# Supplementary material
Source: PubMed Central journal article supplement (PMC7611055)
Supplement: EMS121969-supplement-Supplementary_Material.pdf [file EMS121969-supplement-Supplementary_Material.pdf]

Drugs inhibiting TMEM16 proteins block SARS-CoV-2 Spike-induced syncytia

*L. Braga, H. Ali et al.*

#### SUPPLEMENTARY INFORMATION GUIDE

**Supplementary Information Table 1. Results of the screenings with drugs from the Prestwick Chemical Library (left) and Spectrum Collection (right) using the Cell Fusion Inhibition Assay (CFIA).** Red: z score <-2.58 or >2.58. Blue: z score from <-1.96 to -2.58 or from >1.96 to 2.58.

**Supplementary Information Table 2. Results of the screenings with drugs from the Prestwick Chemical Library (left) and Spectrum Collection (right) using the Syncytium Inhibition Assay (SIA).** Red: z score <-2.58 or >2.58. Blue: z score from <-1.96 to -2.58 or from >1.96 to 2.58. Note that 4-hydroxychalcone is duplicated in the library MS Discovery Spectrum Collection library.

**Supplementary Information Table 3. List of primers used in the study**

**Supplementary Information Figure 1.** Original blots relative to Extended Data Figs. 7b and 8b and 8c. Boxes with red dotted lines are the regions used in the figures.

**Supplementary Video 1. Heterologous cell fusion.** Twelve-hr time lapse imaging of co-cultures of human U2OS cells transfected with a control plasmid (left) or with pEC117-Spike-V5, expressing SARS-CoV-2 S protein (right), together with Vero cells expressing EGFP. At the end of the imaging period, cells were fixed and nuclei were counterstained with DAPI.

**Supplementary Videos 2 and 3. Formation of syncytia.** Twelve-hr time lapse imaging of Vero cells transfected with GCaMP6s (green), showing progressive cell fusion and formation of syncytia.

**Supplementary Video 4. Calcium oscillations in cells undergoing fusion.** Time-lapse imaging of 12-hr co-cultures of Vero cells expressing the GCaMP6s Ca<sup>2+</sup> sensor with U2OS cells expressing Spike and mCherry. Spike-mediated fusion events correlated with numerous oscillations in intracellular Ca<sup>2+</sup> levels. Individual frames from this movie are in **Fig. 2b**.

**Supplementary Video 5. Effect of syncytia-inhibiting drugs on Ca<sup>2+</sup> oscillations.** Time-lapse imaging of Vero cells expressing the GCaMP6s Ca<sup>2+</sup> sensor in the presence of the indicated drugs (1  $\mu$ M Niclosamide and 5  $\mu$ M Clofazimine and Salinomycin) or of DMSO Control. A reduction in Ca<sup>2+</sup> transients is evident with Niclosamide and Clofazimine. Quantification of this Ca<sup>2+</sup> activity is in **Fig. 2d**. Individual frames from the movie with DMSO (Control) are in **Fig. 2c**.

**Supplementary Video 6. Effect of Calcium depletion and SERCA inhibition on Ca<sup>2+</sup> oscillations.**

Time-lapse imaging of Vero cells co-expressing the GCaMP6s Ca<sup>2+</sup> sensor and either an empty vector (Control) or Spike. Cells were cultured in normal medium (upper panels), medium without Ca<sup>2+</sup>, or normal medium supplemented with the SERCA inhibitors thapsigargin (TG) or cyclopiazonic acid (CPA). A reduction in Ca<sup>2+</sup> transients is evident in all the three treatments. Quantification of this Ca<sup>2+</sup> activity is in **Extended Data Figs. 6c and 6d**.

**Supplementary Information Table 1 - Results of the screenings with drugs from the Prestwick Chemical Library (left) and Spectrum Collection (right) using the Cell Fusion Inhibition Assay (CFIA). Red: z score <-2.58 or >2.58. Blue: z score from <-1.96 to -2.58 or from >1.96**

| Cell Fusion Inhibition Assay (CFIA)     |             |         |
|-----------------------------------------|-------------|---------|
| Prestwick Chemical Library              |             |         |
| Chemical name                           | CAS number  | z score |
| Cyclosporin A                           | 59865-13-3  | -3.0882 |
| Fluspirilen                             | 1841-19-6   | -3.0066 |
| Ivermectin                              | 70288-86-7  | -2.9869 |
| Methiothepin maleate                    | 19728-88-2  | -2.7833 |
| Cyclobenzaprine hydrochloride           | 6202-23-9   | -2.7502 |
| Zotepine                                | 26615-21-4  | -2.7274 |
| Perphenazine                            | 58-39-9     | -2.6597 |
| Metergoline                             | 17692-51-2  | -2.6579 |
| (R)-Duloxetine hydrochloride            | 116539-60-7 | -2.5304 |
| Loperamide hydrochloride                | 34552-83-5  | -2.4975 |
| Pimozide                                | 2062-78-4   | -2.4850 |
| Clemastine fumarate                     | 14976-57-9  | -2.4625 |
| Norcyclobenzaprine                      | 303-50-4    | -2.4255 |
| Ethopropazine hydrochloride             | 1094-08-2   | -2.3782 |
| Maprotiline hydrochloride               | 10347-81-6  | -2.3369 |
| Deptropine citrate                      | 2169-75-7   | -2.3144 |
| Monensin sodium salt                    | 22373-78-0  | -2.3037 |
| Zuclopenthixol dihydrochloride          | 633-59-0    | -2.2848 |
| Carvedilol                              | 72956-09-3  | -2.2795 |
| Clofazimine                             | 2030-63-9   | -2.2339 |
| Homochlorcyclizine dihydrochloride      | 1982-36-1   | -2.1783 |
| Pimethixene maleate                     | 13187-06-9  | -2.1415 |
| Desipramine hydrochloride               | 58-28-6     | -2.1407 |
| Pitavastatin calcium                    | 147511-69-1 | -2.1380 |
| Trimipramine maleate salt               | 521-78-8    | -2.1374 |
| Digitoxigenin                           | 143-62-4    | -2.1341 |
| Terconazole                             | 67915-31-5  | -2.1103 |
| Chlorprothixene hydrochloride           | 6469-93-8   | -2.0890 |
| Bepiridil hydrochloride                 | 74764-40-2  | -2.0702 |
| Clomiphene citrate (Z,E)                | 50-41-9     | -2.0567 |
| Cyproheptadine hydrochloride            | 969-33-5    | -2.0205 |
| Digoxigenin                             | 1672-46-4   | -2.0085 |
| Mebhydroline 1,5-naphthalenedisulfonate | 6153-33-9   | -1.9997 |
| Amitriptyline hydrochloride             | 549-18-8    | -1.9914 |
| Dimethisoquin hydrochloride             | 2773-92-4   | -1.9181 |
| Fluphenazine dihydrochloride            | 146-56-5    | -1.9000 |
| Posaconazole                            | 171228-49-2 | -1.8741 |
| Chloroquine diphosphate                 | 50-63-5     | -1.8721 |
| Diphenylpyraline hydrochloride          | 132-18-3    | -1.8688 |
| Mebeverine hydrochloride                | 2753-45-9   | -1.8664 |
| Bromperidol                             | 10457-90-6  | -1.8584 |
| Desloratadine                           | 100643-71-8 | -1.8529 |
| Lovastatin                              | 75330-75-5  | -1.8219 |
| Nisoxetine hydrochloride                | 57754-86-6  | -1.8210 |
| Nylidrin                                | 447-41-6    | -1.8153 |
| Ketotifen fumarate                      | 34580-14-8  | -1.8087 |
| Ketoconazole                            | 65277-42-1  | -1.7552 |
| Ibutilide fumarate                      | 122647-32-9 | -1.7541 |
| Haloperidol                             | 52-86-8     | -1.7535 |
| S(-)-Eticlopride hydrochloride          | 97612-24-3  | -1.7513 |
| Cinoxacin                               | 28657-80-9  | -1.7139 |
| Mesoridazine besylate                   | 32672-69-8  | -1.7111 |
| Nortriptyline hydrochloride             | 894-71-3    | -1.7016 |
| Amodiaquin dihydrochloride dihydrate    | 6398-98-7   | -1.7000 |
| Methyl dopa (L,-)                       | 555-30-6    | -1.6805 |
| Promazine hydrochloride                 | 53-60-1     | -1.6768 |
| Verteporfin                             | 129497-78-5 | -1.6756 |
| Protriptyline hydrochloride             | 1225-55-4   | -1.6696 |
| Toremifene                              | 89778-26-7  | -1.6348 |
| Methotrimeprazine maleat salt           | 7104-38-3   | -1.6218 |
| Fluvastatin sodium salt                 | 93957-55-2  | -1.6111 |
| Citalopram Hydrobromide                 | 59729-32-7  | -1.6101 |
| Cefaclor hydrate                        | 70356-03-5  | -1.6027 |
| Dilazep dihydrochloride                 | 20153-98-4  | -1.5923 |
| Spiperone                               | 749-02-0    | -1.5838 |
| Metixene hydrochloride                  | 1553-34-0   | -1.5769 |
| Carbetapentane citrate                  | 23142-01-0  | -1.5453 |
| Chlorcyclizine hydrochloride            | 1620-21-9   | -1.5449 |

| Cell Fusion Inhibition Assay (CFIA)                  |                        |         |
|------------------------------------------------------|------------------------|---------|
| The Spectrum Collection, MS Discovery System         |                        |         |
| Chemical name                                        | CAS number             | z score |
| HYDROXYZINE HYDROCHLORIDE                            | 2192-30-3              | -3.5386 |
| PERGOLIDE MESYLATE                                   | 66104-22-1             | -3.4141 |
| METITEPINE MESYLATE                                  | 20229-30-5             | -3.3941 |
| METHYL CHOLATE                                       | 1448-36-8              | -3.3284 |
| NORTRIPTYLINE HYDROCHLORIDE                          | 894-71-3, 72-69-5 [no  | -3.2783 |
| ISOPOMIFERIN                                         |                        | -3.2579 |
| ESTRIOL BENZYL ETHER                                 |                        | -3.1300 |
| CLOPERASTINE HYDROCHLORIDE                           | 3703-76-2              | -3.0454 |
| CYCLOSPORINE                                         | 59865-13-3             | -2.9511 |
| ARTENIMOL                                            | 81496-81-3             | -2.8914 |
| CARVEDILOL PHOSPHATE                                 | 610309-89-2            | -2.8863 |
| ALLYLESTRENOL                                        | 432-60-0               | -2.7968 |
| GEDUNOL                                              |                        | -2.6446 |
| LANATOSIDE C                                         | 17575-22-3             | -2.5833 |
| CONESSINE                                            | 5913-82-6, 546-06-5 [  | -2.5747 |
| DIHYDROCELASTROL                                     |                        | -2.5602 |
| DIHYDROGAMBOGIC ACID                                 |                        | -2.5086 |
| TOREMIFENE CITRATE                                   | 89778-27-8             | -2.3984 |
| BROMPERIDOL                                          | 10457-90-6             | -2.3592 |
| 4,6-DIMETHOXY-5-METHYLISOFLAVONE                     |                        | -2.3287 |
| TRIMIPRAMINE MALEATE                                 | 521-78-8, 739-71-9 [tr | -2.3284 |
| BENZTROPINE MESYLATE                                 | 132-17-2, 86-13-5 [be  | -2.3148 |
| OUABAIN OCTAHYDRATE                                  | 11018-89-6             | -2.2981 |
| DIGOXIGENIN                                          | 1672-46-4              | -2.2690 |
| MEVASTATIN                                           | 73573-88-3             | -2.2690 |
| DIGOXIN                                              | 20830-75-5             | -2.2658 |
| CITRININ                                             | 518-75-2               | -2.2642 |
| CANTHAXANTHIN (euglenanone)                          | 514-78-3               | -2.2179 |
| METHYL 7-DESOXYPURPUGALLIN-7-CARBOXYLATE TRIMETHYL E |                        | -2.2156 |
| TRIMEPRAZINE TARTRATE                                | 4330-99-8, 41375-66-   | -2.2119 |
| FENDILINE HYDROCHLORIDE                              | 113042-18-7            | -2.2065 |
| SALINOMYCIN, SODIUM                                  | 55721-31-8; 53003-10   | -2.1939 |
| 1,3-DIDEACETYL-7-DEACETOXY-7-OXOKHIVORIN             |                        | -2.1887 |
| DROFENINE HYDROCHLORIDE                              | 1679-76-1              | -2.1833 |
| CRYPTOTANSINONE                                      | 35825-57-1             | -2.1651 |
| POMIFERIN                                            | 572-03-2               | -2.1632 |
| MEBEVERINE HYDROCHLORIDE                             | 2753-45-9, 3625-06-7   | -2.1437 |
| AMITRIPTYLINE HYDROCHLORIDE                          | 549-18-8               | -2.1179 |
| HARMALINE                                            | 304-21-2               | -2.1063 |
| FLUOXETINE HYDROCHLORIDE                             | 54910-89-3             | -2.0888 |
| BENOXINATE HYDROCHLORIDE                             | 5987-82-6              | -2.0839 |
| THIORIDAZINE HYDROCHLORIDE                           | 130-61-0, 50-52-2 [thi | -2.0838 |
| MUNDULONE                                            | 481-94-7               | -2.0647 |
| OSELTAMIVIR PHOSPHATE                                | 204255-11-8            | -2.0638 |
| BEPRIDIL HYDROCHLORIDE                               | 74764-40-2             | -2.0633 |
| PIMETHIXENE MALEATE                                  | 314-03-4               | -2.0517 |
| CINACALCET HYDROCHLORIDE                             | 364782-34-3            | -2.0359 |
| DIPERODON HYDROCHLORIDE                              | 537-12-2               | -2.0283 |
| DEOXYGEDUNIN                                         | 21963-95-1             | -2.0164 |
| THIOPHANATE METHYL                                   | 23564-06-9             | -2.0014 |
| ASTEMIZOLE                                           | 68844-77-9             | -1.9922 |
| GOSSYPIN                                             | 652-78-8               | -1.9790 |
| BROMPHENIRAMINE MALEATE                              | 980-71-2, 86-22-6 [br  | -1.9645 |
| DARIFENACIN HYDROBROMIDE                             | 133099-07-7            | -1.9626 |
| URIDINE                                              | 58-96-8                | -1.9448 |
| BERBAMINE HYDROCHLORIDE                              | 6078-17-7              | -1.9379 |
| APREPITANT                                           | 170729-80-3            | -1.9358 |
| THEANINE POTASSIUM                                   | 3081-61-6              | -1.9345 |
| CYPROHEPTADINE HYDROCHLORIDE                         | 969-33-5               | -1.9328 |
| TAMOXIFEN CITRATE                                    | 54965-24-1, 10540-29   | -1.9292 |
| 5alpha-CHOLESTAN-3beta-OL-6-ONE                      |                        | -1.8939 |
| SILIBININ                                            | 22888-70-6             | -1.8922 |
| CYCLOBENZAPRINE HYDROCHLORIDE                        | 6202-23-9, 303-53-7 [  | -1.8914 |
| LACTOBIONIC ACID                                     | 96-82-2                | -1.8891 |
| CHLORPROTHIXENE HYDROCHLORIDE                        | 113-59-7               | -1.8886 |
| TERCONAZOLE                                          | 67915-31-5             | -1.8853 |
| TILORONE                                             | 27591-69-1, 27591-97   | -1.8672 |
| AMODIAQUINE DIHYDROCHLORIDE                          | 6398-98-7, 69-44-3 [a  | -1.8583 |

|                                           |               |         |
|-------------------------------------------|---------------|---------|
| Felodipine                                | 72509-76-3    | -1.5354 |
| Xylometazoline hydrochloride              | 1218-35-5     | -1.5019 |
| Nafronyl oxalate                          | 474972        | -1.5003 |
| Nicergoline                               | not available | -1.4885 |
| Proadifen hydrochloride                   | 62-68-0       | -1.4862 |
| Drofenine hydrochloride                   | 548-66-3      | -1.4737 |
| Benztropine mesylate                      | 132-17-2      | -1.4676 |
| Salmeterol                                | 89365-50-4    | -1.4584 |
| (-) -Levobunolol hydrochloride            | 27912-14-7    | -1.4501 |
| Dosulepin hydrochloride                   | 897-15-4      | -1.4474 |
| Itraconazole                              | 84625-61-6    | -1.4399 |
| Diperodon hydrochloride                   | 537-12-2      | -1.4070 |
| Chlormezanone                             | 80-77-3       | -1.3806 |
| Nicardipine hydrochloride                 | 54527-84-3    | -1.3471 |
| Isoflupredone acetate                     | 338-98-7      | -1.3190 |
| (-) -Emtricitabine                        | 143491-57-0   | -1.3080 |
| Oxethazaine                               | 126-27-2      | -1.3020 |
| Pentobarbital                             | 76-74-4       | -1.2997 |
| Amyleine hydrochloride                    | 532-59-2      | -1.2931 |
| Asenapine maleate                         | 85650-56-2    | -1.2867 |
| Molindone hydrochloride                   | 15622-65-8    | -1.2831 |
| Tomoxetine hydrochloride                  | 82248-59-7    | -1.2828 |
| Penbutolol sulfate                        | 38363-32-5    | -1.2691 |
| Methacholine chloride                     | 62-51-1       | -1.2659 |
| Pipenzolate bromide                       | 125-51-9      | -1.2376 |
| Aminopurine, 6-benzyl                     | 1214-39-7     | -1.2338 |
| Reserpine                                 | 50-55-5       | -1.2300 |
| Clemizole hydrochloride                   | 1163-36-6     | -1.2055 |
| Doxylamine succinate                      | 562-10-7      | -1.1975 |
| Urosiol                                   | 128-13-2      | -1.1891 |
| Trimeprazine tartrate                     | 4330-99-8     | -1.1823 |
| Pizotifen malate                          | 1201595       | -1.1807 |
| Benzathine benzylpenicillin               | 5928-84-7     | -1.1719 |
| Clozapine                                 | 5786-21-0     | -1.1708 |
| Benzylamine hydrochloride                 | 132-69-4      | -1.1675 |
| Verapamil hydrochloride                   | 152-11-4      | -1.1652 |
| Piperacetazine                            | 3819-00-9     | -1.1578 |
| Dicumarol                                 | 66-76-2       | -1.1538 |
| Darifenacin hydrobromide                  | 133099-07-7   | -1.1477 |
| Fluvoxamine maleate                       | 61718-82-9    | -1.1460 |
| Diflunisal                                | 22494-42-4    | -1.1401 |
| Cloperastine hydrochloride                | 14984-68-0    | -1.1387 |
| Mephentermine hemisulfate                 | 1212-72-2     | -1.1310 |
| Nizatidine                                | 76963-41-2    | -1.1254 |
| Lithocholic acid                          | 434-13-9      | -1.1116 |
| Venlafaxine                               | 93413-69-5    | -1.1113 |
| Dextromethorphan hydrobromide monohydrate | 6700-34-1     | -1.1078 |
| Equilin                                   | 474-86-2      | -1.1060 |
| Domperidone                               | 57808-66-9    | -1.0901 |
| Orphenadrine hydrochloride                | 341-69-5      | -1.0750 |
| Imatinib                                  | 152459-95-5   | -1.0742 |
| Amoxapine                                 | 14028-44-5    | -1.0681 |
| Perospirone                               | 150915-41-6   | -1.0641 |
| Epiandrosterone                           | 481-29-8      | -1.0605 |
| Thiopropazine dimesylate                  | 2347-80-0     | -1.0549 |
| Acetaminophen                             | 103-90-2      | -1.0544 |
| Betaxolol hydrochloride                   | 63659-19-8    | -1.0494 |
| Tacrine hydrochloride                     | 1684-40-8     | -1.0463 |
| Imipramine hydrochloride                  | 113-52-0      | -1.0451 |
| Irsogladine maleate                       | 84504-69-8    | -1.0451 |
| Promethazine hydrochloride                | 58-33-3       | -1.0435 |
| Clomipramine hydrochloride                | 17321-77-6    | -1.0139 |
| Diphenhydramine hydrochloride             | 147-24-0      | -1.0125 |
| Vinpocetine                               | 42971-09-5    | -0.9842 |
| Lofepamine                                | 23047-25-8    | -0.9824 |
| Alverine citrate salt                     | 5560-59-8     | -0.9715 |
| Pramoxine hydrochloride                   | 637-58-1      | -0.9710 |
| Thiorphan                                 | 76721-89-6    | -0.9583 |
| Clorsulon                                 | 60200-06-8    | -0.9567 |
| Nimodipine                                | 66085-59-4    | -0.9546 |
| Ketorolac tromethamine                    | 74103-07-4    | -0.9522 |
| Doxapram hydrochloride                    | 7081-53-0     | -0.9514 |
| Amisulpride                               | 71675-85-9    | -0.9482 |
| Torse mide                                | 56211-40-6    | -0.9446 |

|                                                         |                       |         |
|---------------------------------------------------------|-----------------------|---------|
| PURPURIN                                                | 81-54-9               | -1.8425 |
| VINPOCETINE                                             | 42971-09-5            | -1.8411 |
| LABELALOL HYDROCHLORIDE                                 | 32780-64-6            | -1.8158 |
| DESTHIOBIOTIN (+)                                       | 15720-25-9            | -1.8154 |
| TANSHINONE IIA                                          | 568-72-9              | -1.8058 |
| GYROMITRIN                                              | 16568-02-8            | -1.7972 |
| CLOMIPHENE CITRATE                                      | 50-41-9, 911-45-5 [cl | -1.7857 |
| NAFTOPIDIL                                              | 57149-07-2            | -1.7677 |
| QUERCETIN                                               | 117-39-5, 6151-25-3(f | -1.7645 |
| BETAMETHASONE                                           | 378-44-9              | -1.7595 |
| HARMOL                                                  |                       | -1.7585 |
| p-ANISIC ACID                                           | 100-09-4              | -1.7541 |
| HARMANE                                                 | 486-84-0              | -1.7533 |
| HOMATROPINE HYDROBROMIDE                                | 51-56-9, 87-00-3 [hon | -1.7515 |
| ORPHENADRINE CITRATE                                    | 4682-36-4, 83-98-7 [o | -1.7376 |
| PYRONARIDINE TETRAPHOSPHATE                             | 76748-86-2            | -1.7262 |
| CARAZOLOL                                               | 57775-29-8            | -1.7253 |
| MAFENIDE HYDROCHLORIDE                                  | 138-39-6              | -1.7219 |
| 21-ACETOXPREGNENOLONE                                   | 566-78-9              | -1.7203 |
| 3beta-ACETOXY-23-BROMO-ISOALLOSPIROST-9 (11)-ENE-12-ONE |                       | -1.7098 |
| PIMOZIDE                                                | 2062-78-4             | -1.7065 |
| STROPHANTHIDIN ACETATE                                  |                       | -1.6891 |
| ELAIDYLPHOSPHOCHOLINE                                   | 156161-89-6           | -1.6879 |
| ISOPIMPINELLIN                                          | 482-27-9              | -1.6758 |
| ERYTHROMYCIN ESTOLATE                                   | 134-36-1, 114-07-8 [e | -1.6697 |
| ISOKOBUSONE                                             | 24173-72-6            | -1.6617 |
| EXALAMIDE                                               | 53370-90-4            | -1.6580 |
| METOPROLOL TARTRATE                                     | 56392-17-7, 37350-58  | -1.6403 |
| ESTRADIOL METHYL ETHER                                  | 1035-77-4             | -1.6375 |
| DIPHENHYDRAMINE HYDROCHLORIDE                           | 147-24-0              | -1.6344 |
| ERYTHROSE                                               | 583-50-6              | -1.6301 |
| LUPEOL                                                  | 545-47-1              | -1.6185 |
| DIMENHYDRINATE                                          | 523-87-5              | -1.6124 |
| ETHOPROPAZINE HYDROCHLORIDE                             | 1094-08-2, 522-00-9 [ | -1.6117 |
| ROSOLIC ACID                                            | 603-45-2              | -1.6081 |
| o-VERATRALDEHYDE                                        | 86-51-1               | -1.6059 |
| MOXISLYTE HYDROCHLORIDE                                 | 54-32-0               | -1.5988 |
| ANABASINE HYDROCHLORIDE                                 | 53912-89-3            | -1.5912 |
| NEROL                                                   | 106-25-2              | -1.5912 |
| NYLIDRIN HYDROCHLORIDE                                  | 849-55-8              | -1.5905 |
| MAPROTILINE HYDROCHLORIDE                               | 10347-81-6, 10262-69  | -1.5821 |
| TRIMETAZIDINE DIHYDROCHLORIDE                           | 5011-34-7             | -1.5751 |
| EBASTINE                                                | 90729-43-4            | -1.5699 |
| 3,6-DIMETHOXYFLAVONE                                    |                       | -1.5684 |
| 2,3,4-TRIMETHOXYPHENYLACETIC ACID                       | 22480-91-7            | -1.5563 |
| NILVADIPINE                                             | 75530-68-6            | -1.5543 |
| DOMPERIDONE                                             | 57808-66-9            | -1.5539 |
| AZELASTINE HYDROCHLORIDE                                | 58581-89-8            | -1.5518 |
| D-(+)-MALTOSE                                           | 69-79-4               | -1.5517 |
| GINKGOLIDE A                                            | 15291-75-5            | -1.5469 |
| METHYL DEOXYCHOLATE                                     | 3245-38-3             | -1.5457 |
| TRIHENXYPHENIDYL HYDROCHLORIDE                          | 52-49-3               | -1.5443 |
| PHENYL AMINOSALICYLATE                                  | 133-11-9              | -1.5361 |
| ANDROSTERONE ACETATE                                    | 1164-95-0             | -1.5272 |
| SODIUM TETRADECYL SULFATE                               | 139-88-8              | -1.5240 |
| DIGITOXIN                                               | 71-63-6               | -1.5234 |
| ELETRIPTAN HYDROBROMIDE                                 | 177834-92-3, 143322-  | -1.5169 |
| p-FLUOROPHENYLALANINE                                   | 51-65-0               | -1.5165 |
| TRIPROLIDINE HYDROCHLORIDE                              | 6138-79-0, 550-70-9 [ | -1.5153 |
| BISABOLOL                                               | 515-69-5              | -1.5071 |
| PERSEITOL                                               | 527-06-0              | -1.5059 |
| PAROXETINE HYDROCHLORIDE                                | 78246-49-8, 61869-08  | -1.5055 |
| MUCIC ACID                                              | 526-99-8              | -1.5054 |
| TRIMETHYLCOLCHICINIC ACID                               | 3482-37-9             | -1.4902 |
| HYDROQUININE HYDROBROMIDE HYDRATE                       | 207386-86-5           | -1.4878 |
| CLEMIZOLE HYDROCHLORIDE                                 | 1163-36-6, 442-52-4(f | -1.4864 |
| 3alpha-ACETOXYDIHYDRODEOXYGEDUNIN                       |                       | -1.4844 |
| POMIFERIN TRIMETHYL ETHER                               |                       | -1.4837 |
| DESOGESTREL                                             | 54024-22-5            | -1.4702 |
| CYCLANDELATE                                            | 456-59-7              | -1.4699 |
| PEMPIDINE TARTRATE                                      | 546-48-5              | -1.4670 |
| SOLIFENACIN SUCCINATE                                   | 242478-37-1           | -1.4610 |
| DEHYDROVARIABILIN                                       |                       | -1.4517 |
| PHENOTHIAZINE                                           | 92-94-2               | -1.4515 |

|                                              |             |         |
|----------------------------------------------|-------------|---------|
| Pyrilamine maleate                           | 59-33-6     | -0.9360 |
| Chloropyramine hydrochloride                 | 6170-42-9   | -0.9334 |
| Opipramol dihydrochloride                    | 909-39-7    | -0.9265 |
| Azelastine hydrochloride                     | 79307-93-0  | -0.9239 |
| Minoxidil                                    | 38304-91-5  | -0.9226 |
| Paromomycin sulfate                          | 1263-89-4   | -0.9197 |
| Bromopride                                   | 4093-35-0   | -0.9184 |
| Pirlindole mesylate                          | 60762-57-4  | -0.9159 |
| Pridinol methanesulfonate salt               | 6856-31-1   | -0.9086 |
| Fipexide hydrochloride                       | 34161-23-4  | -0.8997 |
| Pheniramine maleate                          | 132-20-7    | -0.8987 |
| Dipivefrin hydrochloride                     | 64019-93-8  | -0.8964 |
| Fluoxetine hydrochloride                     | 59333-67-4  | -0.8962 |
| Mifepristone                                 | 84371-65-3  | -0.8933 |
| Aprepitant                                   | 170729-80-3 | -0.8931 |
| Dibucaine                                    | 85-79-0     | -0.8918 |
| Moclobemide                                  | 71320-77-9  | -0.8904 |
| Escitalopram oxalate                         | 128196-01-0 | -0.8882 |
| Milnacipran hydrochloride                    | 101152-94-7 | -0.8870 |
| Dyclonine hydrochloride                      | 536-43-6    | -0.8811 |
| Pilocarpine nitrate                          | 148-72-1    | -0.8772 |
| Norfloxacin                                  | 70458-96-7  | -0.8646 |
| Succinylsulfathiazole                        | 116-43-8    | -0.8624 |
| Ketanserin tartrate hydrate                  | 83846-83-7  | -0.8594 |
| Todalazine hydrochloride                     | 3778-76-5   | -0.8594 |
| Clinafloxacin                                | 105956-97-6 | -0.8550 |
| Methapyrilene hydrochloride                  | 135-23-9    | -0.8527 |
| Chlorhexidine                                | 55-56-1     | -0.8459 |
| Tetracaine hydrochloride                     | 136-47-0    | -0.8382 |
| Tinidazole                                   | 19387-91-8  | -0.8325 |
| Doxepin hydrochloride                        | 1229-29-4   | -0.8303 |
| Pyridostigmine iodide                        | 1017265     | -0.8296 |
| Cefotetan                                    | 69712-56-7  | -0.8268 |
| Aripiprazole                                 | 129722-12-9 | -0.8204 |
| Lopinavir                                    | 192725-17-0 | -0.8195 |
| Pentetic acid                                | 67-43-6     | -0.8173 |
| Tenatoprazole                                | 113712-98-4 | -0.8163 |
| Memantine Hydrochloride                      | 41100-52-1  | -0.8159 |
| Althiazide                                   | 5588-16-9   | -0.8154 |
| Diphenidol hydrochloride                     | 3254-89-5   | -0.8147 |
| Dronedarone hydrochloride                    | 141626-36-0 | -0.8138 |
| Norgestimate                                 | 35189-28-7  | -0.8105 |
| Dihydroergotamine tartrate                   | 5989-77-5   | -0.8056 |
| Gemifloxacin mesylate                        | 175463-14-6 | -0.8056 |
| Racecadotril                                 | 81110-73-8  | -0.8056 |
| Trimethadione                                | 127-48-0    | -0.8056 |
| Bambuterol hydrochloride                     | 81732-46-9  | -0.8023 |
| Rifabutin                                    | 72559-06-9  | -0.8022 |
| Hydroxyzine dihydrochloride                  | 2192-20-3   | -0.8007 |
| Vatalanib                                    | 212141-54-3 | -0.7990 |
| Mepivacaine hydrochloride                    | 1722-62-9   | -0.7931 |
| Dimenhydrinate                               | 523-87-5    | -0.7929 |
| Trimethobenzamide hydrochloride              | 554-92-7    | -0.7897 |
| Tropisetron hydrochloride                    | 105826-92-4 | -0.7854 |
| Esmolol hydrochloride                        | 81161-17-3  | -0.7851 |
| Deflazacort                                  | 14484-47-0  | -0.7844 |
| Furazolidone                                 | 67-45-8     | -0.7838 |
| Meglumine                                    | 6284-40-8   | -0.7802 |
| Phenelzine sulfate                           | 156-51-4    | -0.7706 |
| Dinoprost trometamol                         | 38362-01-5  | -0.7705 |
| Benperidol                                   | 2062-84-2   | -0.7680 |
| Trihexyphenidyl-D,L Hydrochloride            | 58947-95-8  | -0.7663 |
| Deferoxamine mesylate                        | 138-14-7    | -0.7644 |
| Minocycline hydrochloride                    | 13614-98-7  | -0.7602 |
| Trifluoperazine dihydrochloride              | 440-17-5    | -0.7597 |
| Metaproterenol sulfate, orciprenaline sulfat | 5874-97-5   | -0.7588 |
| Antazoline hydrochloride                     | 2508-72-7   | -0.7570 |
| Loxapine succinate                           | 27833-64-3  | -0.7533 |
| Tosufloxacin hydrochloride                   | 100490-36-6 | -0.7525 |
| Mirtazapine                                  | 61337-67-5  | -0.7518 |
| Molsidomine                                  | 25717-80-0  | -0.7476 |
| Bupropion hydrochloride                      | 31677-93-7  | -0.7469 |
| Olanzapine                                   | 132539-06-1 | -0.7405 |
| Ciclesonide                                  | 126544-47-6 | -0.7387 |

|                                        |                       |         |
|----------------------------------------|-----------------------|---------|
| METHYL EUDESMATE                       | 1916-07-0             | -1.4474 |
| 2,3-DIHYDROXY-6,7-DICHLOROQUINOXALINE  |                       | -1.4392 |
| DIBENZOYLMETHANE                       | 120-46-7              | -1.4376 |
| HAEMATOPORPHYRIN                       | 14459-29-1            | -1.4341 |
| HYDROXYPROGESTERONE CAPROATE           | 630-56-8              | -1.4320 |
| CLIMBAZOLE                             | 38083-17-9            | -1.4317 |
| CAPSANTHIN                             | 465-42-9              | -1.4219 |
| NICLOSAMIDE                            | 50-65-7               | -1.4193 |
| METHYL MANDELATE                       | 4358-87-6             | -1.4162 |
| DEOXSAPPANONE B 7,3'-DIMETHYL ETHER    |                       | -1.4123 |
| IMATINIB                               | 152459-95-5           | -1.4072 |
| HARMALOL HYDROCHLORIDE DIHYDRATE       | 1507909               | -1.4041 |
| ACETYL-DIHYDRO-7-EPIKIVORIN            |                       | -1.3924 |
| ORBIFLOXACIN                           | 113617-63-3           | -1.3896 |
| NITAZOXANIDE                           | 55981-09-4            | -1.3864 |
| 7-DEACETYLKIVORIN                      |                       | -1.3773 |
| TRYPTAMINE                             | 61-54-1               | -1.3757 |
| OXELAIDIN CITRATE                      | 52432-72-1, 468-61-1  | -1.3756 |
| EPIANDROSTERONE                        | 481-29-8              | -1.3651 |
| VERATRINE HYDROCHLORIDE                | 17666-25-0; 62-59-9   | -1.3635 |
| GALANGIN TRIMETHYL ETHER               | 26964-29-4            | -1.3565 |
| ISOCOTOIN                              | 81525-12-4            | -1.3563 |
| RALOXIFENE HYDROCHLORIDE               | 82640-04-8            | -1.3532 |
| IRIGENIN                               | 548-76-5              | -1.3478 |
| 7-HYDROXY-2'-METHOXYISOFLAVONE         |                       | -1.3447 |
| SECNIDAZOLE                            | 3366-95-8             | -1.3417 |
| GEMIFLOXACIN MESYLATE                  | 204519-65-3           | -1.3407 |
| XANTHOXYLIN                            | 90-24-4               | -1.3394 |
| SR-2640                                | 105350-26-3           | -1.3346 |
| AVOCADYNE                              | 34524-38-4            | -1.3344 |
| BENZAEPRILOL HYDROCHLORIDE             | 86541-74-4            | -1.3263 |
| GOSSYPOL-ACETIC ACID COMPLEX           |                       | -1.3238 |
| PURPURUGALLIN                          | 569-77-7              | -1.3186 |
| EMEDASTINE DIFUMARATE                  | 87233-62-3            | -1.3158 |
| ERGOSTEROL                             | 57-87-4               | -1.3152 |
| SCLAREOL                               | 515-03-7              | -1.3138 |
| NIALAMIDE                              | 51-12-7               | -1.3132 |
| PTAEROXYLIN                            | 14729-11-4            | -1.3126 |
| FORMESTANE                             | 566-48-3              | -1.3117 |
| CHRYSOPHANOL                           | 481-74-3              | -1.3105 |
| CARVEDILOL                             | 72956-09-3            | -1.3070 |
| HUPERZINE A                            | 102518-79-6           | -1.2950 |
| SPIPERONE                              | 749-02-0              | -1.2950 |
| PREGNENOLONE                           | 145-13-1, 4598-67-8   | -1.2935 |
| CHLORAMPHENICOL PALMITATE              | 530-43-8              | -1.2866 |
| CHOLESTAN-3-ONE                        | 566-88-1              | -1.2782 |
| FLAVONE                                | 525-82-6              | -1.2782 |
| PIPERONYL BUTOXIDE                     | 51-03-6               | -1.2771 |
| DIMETHYLCAFFEIC ACID                   | 14737-89-4            | -1.2770 |
| LEVOCARNITINE PROPIONATE HYDROCHLORIDE | 119793-66-7           | -1.2723 |
| PIZOTYLIN MALATE                       | 1201595               | -1.2665 |
| EVOXINE                                | 522-11-2              | -1.2561 |
| KETOCONAZOLE                           | 65277-42-1            | -1.2548 |
| 3,4',5,6,7-PENTAMETHOXYFLAVONE         | 4472-73-5             | -1.2534 |
| ACETOPHENAZINE MALEATE                 | 5714-00-1             | -1.2526 |
| NIFLUMIC ACID                          | 4394-00-7             | -1.2493 |
| PROPARACAINE HYDROCHLORIDE             | 575-06-98             | -1.2474 |
| DORAMECTIN                             | 117704-25-3           | -1.2441 |
| FENACLON                               | 306-20-7              | -1.2412 |
| OXETHAZAINE                            | 126-27-2              | -1.2369 |
| TACROLIMUS                             | 109581-93-3           | -1.2347 |
| DIPHENYLPYRALINE HYDROCHLORIDE         | 132-18-3 147-20-6 [di | -1.2331 |
| FLUOCINOLONE ACETONIDE                 | 67-73-2               | -1.2304 |
| DAPOXETINE HYDROCHLORIDE               | 1299938-20-1          | -1.2286 |
| 6-(3,4-METHYLENEDIOXYSTYRYL)-alpha-PYR | 1219-50-7             | -1.2285 |
| VESAMICOL HYDROCHLORIDE                | 120447-62-3           | -1.2283 |
| TODRALAZINE HYDROCHLORIDE              | 14679-73-3            | -1.2279 |
| NAFRONYL OXALATE                       | 3200-06-4, 31329-57-  | -1.2249 |
| QUIPAZINE MALEATE                      | 5786-68-5, 4774-24-7  | -1.2150 |
| ABIRATERONE                            | 154229-18-2           | -1.2136 |
| MEBHYDROLIN                            | 524-81-2              | -1.2122 |
| FENOLDOPAM MESYLATE                    | 67227-57-0            | -1.2109 |
| METACRESOL                             | 108-39-4              | -1.2104 |
| DILOXANIDE FUROATE                     | 3736-81-0             | -1.2094 |

|                                        |               |         |
|----------------------------------------|---------------|---------|
| Dirithromycin                          | 62013-04-1    | -0.7371 |
| Methacycline hydrochloride             | 3963-95-9     | -0.7354 |
| Timolol maleate salt                   | 26921-17-5    | -0.7322 |
| Riluzole hydrochloride                 | not available | -0.7300 |
| Ambroxol hydrochloride                 | 23828-92-4    | -0.7283 |
| Metrizamide                            | 31112-62-6    | -0.7269 |
| Clobutinol hydrochloride               | 1215-83-4     | -0.7220 |
| Adrenosterone                          | 382-45-6      | -0.7215 |
| Quetiapine hemifumarate                | 111974-72-2   | -0.7206 |
| Lynestrenol                            | 52-76-6       | -0.7181 |
| Quinapril hydrochloride                | 82586-55-8    | -0.7166 |
| Sildenafil                             | 139755-83-2   | -0.7151 |
| Megestrol acetate                      | 595-33-5      | -0.7089 |
| Selegiline hydrochloride               | 14611-52-0    | -0.7085 |
| Labetalol hydrochloride                | 32780-64-6    | -0.6975 |
| Clocortolone pivalate                  | 34097-16-0    | -0.6946 |
| Allantoin                              | 97-59-6       | -0.6944 |
| Niflumic acid                          | 4394-00-7     | -0.6918 |
| Tramadol hydrochloride                 | 27203-92-5    | -0.6911 |
| Homatropine hydrobromide (R,S)         | 51-56-9       | -0.6897 |
| Urapidil hydrochloride                 | 64887-14-5    | -0.6877 |
| Cefpodoxime proxetil                   | 87239-81-4    | -0.6875 |
| Diethylstilbestrol                     | 56-53-1       | -0.6872 |
| Piretanide                             | 55837-27-9    | -0.6851 |
| Balsalazide Sodium                     | 80573-04-2    | -0.6821 |
| Triflupromazine hydrochloride          | 1098-60-8     | -0.6785 |
| Cleopride maleate                      | 84370-95-6    | -0.6772 |
| Zimelidine dihydrochloride monohydrate | 61129-30-4    | -0.6746 |
| Dioxybenzone                           | 131-53-3      | -0.6667 |
| Dipyridamole                           | 58-32-2       | -0.6666 |
| Diacerein                              | 13739-02-1    | -0.6637 |
| Tiabendazole                           | 148-79-8      | -0.6614 |
| Ceftibuten                             | 97519-39-6    | -0.6580 |
| Reboxetine mesylate                    | 98769-81-4    | -0.6576 |
| Sumatriptan succinate                  | 103628-48-4   | -0.6545 |
| Iodixanol                              | 92339-11-2    | -0.6499 |
| Procyclidine hydrochloride             | 1508-76-5     | -0.6489 |
| Methylatropine nitrate                 | 52-88-0       | -0.6487 |
| Sulfabenzamide                         | 127-71-9      | -0.6478 |
| Ethynylestradiol 3-methyl ether        | 72-33-3       | -0.6463 |
| Josamycin                              | 16846-24-5    | -0.6451 |
| Loratadine                             | 79794-75-5    | -0.6383 |
| (S)-propranolol hydrochloride          | 839971        | -0.6382 |
| Ampiroxicam                            | 99464-64-9    | -0.6351 |
| Progesterone                           | 57-83-0       | -0.6327 |
| Amfepramone hydrochloride              | 90-84-6       | -0.6297 |
| Nitrocaramiphen hydrochloride          | 98636-73-8    | -0.6265 |
| Carprofen                              | 53716-49-7    | -0.6202 |
| Clenbuterol hydrochloride              | 21898-19-1    | -0.6202 |
| Colistin sulfate                       | 1264-72-8     | -0.6202 |
| Aminophylline                          | 317-34-0      | -0.6164 |
| Imiquimod                              | 99011-02-6    | -0.6164 |
| Mevastatin                             | 73573-88-3    | -0.6163 |
| Carbimazole                            | 22232-54-8    | -0.6135 |
| Dicyclomine hydrochloride              | 67-92-5       | -0.6121 |
| Nabumetone                             | 42924-53-8    | -0.6119 |
| Primaquine diphosphate                 | 63-45-6       | -0.6106 |
| Rebamipide                             | 90098-04-7    | -0.6093 |
| Amidopyrine                            | 58-15-1       | -0.6059 |
| Isocarboxazid                          | 59-63-2       | -0.6006 |
| Lofexidine                             | 31036-80-3    | -0.6003 |
| Phentolamine hydrochloride             | 73-05-2       | -0.6003 |
| Doxofylline                            | 69975-86-6    | -0.5946 |
| Bretylum tosylate                      | 61-75-6       | -0.5932 |
| Bezafibrate                            | 41859-67-0    | -0.5921 |
| Emedastine                             | 87233-61-2    | -0.5917 |
| Amikacin hydrate                       | 37517-28-5    | -0.5916 |
| Idebenone                              | 58186-27-9    | -0.5900 |
| Azlocillin sodium salt                 | 37091-65-9    | -0.5893 |
| Dydrogesterone                         | 152-62-5      | -0.5893 |
| Antipyrine                             | 60-80-0       | -0.5888 |
| Cyclizine hydrochloride                | 303-25-3      | -0.5859 |
| Roxatidine Acetate hydrochloride       | 93793-83-0    | -0.5852 |
| Alsetron hydrochloride                 | 122852-69-1   | -0.5835 |

|                                                |                        |         |
|------------------------------------------------|------------------------|---------|
| CYCLOPAMINE                                    | 4449-51-8              | -1.2067 |
| AMPIROXICAM                                    | 99464-64-9             | -1.2030 |
| 5-HYDROXY-2',4',7,8-TETRAMETHOXYFLAVO          | 123316-61-0            | -1.2011 |
| LOMERIZINE HYDROCHLORIDE                       | 101477-55-8            | -1.1994 |
| SOLASODINE                                     | 126-17-0               | -1.1972 |
| DYCLONINE HYDROCHLORIDE                        | 536-43-6               | -1.1960 |
| trans,trans-FARNESOL                           | 4602-84-0              | -1.1933 |
| DOPAMINE HYDROCHLORIDE                         | 62-31-7, 51-61-6 [dop  | -1.1925 |
| HEXAMETHYLQUERCETAGETIN                        | 1251-84-9              | -1.1918 |
| JUGLONE                                        | 481-39-0               | -1.1918 |
| ESTRONE ACETATE                                | 901-93-9               | -1.1876 |
| CAPSAZEPINE                                    | 138977-28-3            | -1.1872 |
| TETRACAINE HYDROCHLORIDE                       | 136-47-0, 94-24-6 [tet | -1.1865 |
| MESTRANOL                                      | 72-33-3                | -1.1863 |
| MEXENEONE                                      | 1641-17-4              | -1.1860 |
| 2-METHOXYRESORCINOL                            | 29267-67-2             | -1.1833 |
| CAMYLOFINE DIHYDROCHLORIDE                     | 54-30-8                | -1.1786 |
| DIPHENYLUREA                                   | 102-07-8               | -1.1784 |
| FLUVASTATIN SODIUM                             | 93957-55-2             | -1.1774 |
| MEMANTINE HYDROCHLORIDE                        | 41100-52-1             | -1.1664 |
| EQUILIN                                        | 474-86-2               | -1.1627 |
| PROXYPHYLLINE                                  | 6003-00-9              | -1.1623 |
| 2,3,4-TRIHYDROXY-4'-ETHOXYBENZOPHENONE         |                        | -1.1596 |
| METHYL 6-HYDROXYANGOLENSATE                    |                        | -1.1585 |
| PROMETHAZINE HYDROCHLORIDE                     | 58-33-3, 60-87-7 [pro  | -1.1559 |
| FLUNISOLIDE                                    | 77326-96-6, 3385-03-   | -1.1551 |
| ACETYLPHENYLALANINE                            |                        | -1.1543 |
| ISOPILOCARPINE NITRATE                         | 531-35-1 (base)        | -1.1523 |
| FISSINOLIDE                                    | 1915-69-1              | -1.1503 |
| N- (9-FLUORENYLMETHOXYCARBONYL)-L-LEU          | 35661-60-0             | -1.1465 |
| NICERGOLINE                                    | 27848-84-6             | -1.1415 |
| 3,4-DIDESMETHYL-5-DESHYDROXY-3'-ETHOXYSCLEROIN |                        | -1.1413 |
| DEACETYLGEDUNIN                                |                        | -1.1324 |
| DIMETHYLSULFONE                                | 67-71-0                | -1.1318 |
| FISETIN                                        | 528-48-3               | -1.1314 |
| TETRAHYDROPALMATINE                            | 2934-97-6              | -1.1299 |
| KOPARIN                                        | 65048-75-1             | -1.1275 |
| NORHARMAN                                      | 244-63-3               | -1.1275 |
| HAEMATOMIC ACID, ETHYL ESTER                   | 39503-14-5             | -1.1241 |
| OXYCLOZANIDE                                   | 2277-92-1              | -1.1238 |
| PHTHALYLSULFACETAMIDE                          | 131-69-1               | -1.1230 |
| PYRIDOSTIGMINE BROMIDE                         | 101-26-8, 155-97-5 [p  | -1.1216 |
| ANTIAROL                                       | 642-71-7               | -1.1204 |
| PROPRANOLOL HYDROCHLORIDE (+/-)                | 318-98-9               | -1.1199 |
| PHENETHYL CAFFEATE (CAPE)                      | 104594-70-9            | -1.1178 |
| 3beta-HYDROXYCHOL-5-ENIC ACID                  | 5255-17-4              | -1.1165 |
| SINENSETIN                                     | 2306-27-6              | -1.1128 |
| TRIPTOPHENOLIDE                                | 74285-86-2             | -1.1111 |
| LORGLUMIDE SODIUM                              | 97964-56-2 (acid)      | -1.1107 |
| CLONIDINE HYDROCHLORIDE                        | 4205-91-8, 4205-90-7   | -1.1097 |
| PHYTOL                                         | 7541-49-3              | -1.1066 |
| LYNESTRENOL                                    | 52-76-6                | -1.1045 |
| PENFLURIDOL                                    | 26864-56-2             | -1.1032 |
| PHLORACETOPHENONE                              | 480-66-0               | -1.0995 |
| SYRINGIC ACID                                  | 530-57-4               | -1.0973 |
| N-BENZOYLPHTHALIMIDE                           | 4583-50-0              | -1.0945 |
| SOLANESOL                                      | 13190-97-1             | -1.0911 |
| CORTEXOLONE                                    | 152-58-9               | -1.0909 |
| FRIEDELIN                                      | 559-74-0               | -1.0890 |
| AZITHROMYCIN                                   | 83905-01-5, 117772-7   | -1.0835 |
| ALLOXAN                                        | 125952                 | -1.0827 |
| ESTRADIOL BENZOATE                             | 50-50-0                | -1.0827 |
| TANGERITIN                                     | 481-53-8               | -1.0802 |
| ISOSAFROLE                                     | 120-58-1               | -1.0781 |
| 4,4'-DIMETHOXYDALBERGIONE                      |                        | -1.0769 |
| ITRACONAZOLE HYDROCHLORIDE                     | 84625-61-6             | -1.0767 |
| STIGMASTA-4,22-DIEN-3-ONE                      | 20817-72-5             | -1.0746 |
| NONIVAMIDE                                     | 2444-46-4              | -1.0709 |
| PENBUTOLOL SULFATE                             | 38363-32-5             | -1.0637 |
| ACETYL HYMETOCHROME                            | 309490                 | -1.0625 |
| MECLOCYCLINE SULFOSALICYLATE                   | 73816-42-9             | -1.0624 |
| MUNDOSERONE                                    | 3564-85-0              | -1.0617 |
| ARBUTIN                                        | 497-76-7               | -1.0589 |
| DEXTROMETHORPHAN HYDROBROMIDE                  | 6700-34-1, 125-69-9 [  | -1.0559 |

|                                  |             |         |
|----------------------------------|-------------|---------|
| Sulfamerazine                    | 127-79-7    | -0.5819 |
| Methazolamide                    | 554-57-4    | -0.5802 |
| Bendroflumethiazide              | 73-48-3     | -0.5801 |
| Allopurinol                      | 315-30-0    | -0.5789 |
| Propylthiouracil                 | 51-52-5     | -0.5694 |
| Oxybutynin chloride              | 1508-65-2   | -0.5694 |
| Isopropamide iodide              | 71-81-8     | -0.5691 |
| 6-Furfurylaminopurine            | 525-79-1    | -0.5686 |
| Amiprilose hydrochloride         | 60414-06-4  | -0.5682 |
| Clorgyline hydrochloride         | 17780-75-5  | -0.5671 |
| Mizolastine                      | 108612-45-9 | -0.5667 |
| Indoprofen                       | 31842-01-0  | -0.5661 |
| Hexetidine                       | 141-94-6    | -0.5637 |
| Proglumide                       | 6620-60-6   | -0.5612 |
| Ceforanide                       | 60925-61-3  | -0.5600 |
| Dihydrostreptomycin sulfate      | 5490-27-7   | -0.5512 |
| Ethionamide                      | 536-33-4    | -0.5498 |
| Troleandomycin                   | 311074      | -0.5476 |
| Biperiden hydrochloride          | 1235-82-1   | -0.5401 |
| Danazol                          | 17230-88-5  | -0.5397 |
| Tioconazole                      | 65899-73-2  | -0.5317 |
| Tolazamide                       | 1156-19-0   | -0.5279 |
| Phenazopyridine hydrochloride    | 136-40-3    | -0.5232 |
| Sulfaquinolaxaline sodium salt   | 967-80-6    | -0.5232 |
| Antipyrine, 4-hydroxy            | 1672-63-5   | -0.5217 |
| Acamprosate calcium              | 77337-73-6  | -0.5203 |
| Tetrahydrozoline hydrochloride   | 522-48-5    | -0.5203 |
| Benserazide hydrochloride        | 14919-77-8  | -0.5185 |
| Sertaconazole nitrate            | 99592-39-9  | -0.5171 |
| Valsartan                        | 137862-53-4 | -0.5135 |
| Isoconazole                      | 27523-40-6  | -0.5115 |
| Alclometasone dipropionate       | 66734-13-2  | -0.5099 |
| Piromidic acid                   | 19562-30-2  | -0.5061 |
| Nimesulide                       | 51803-78-2  | -0.5060 |
| Ropivacaine hydrochloride        | 84057-95-4  | -0.5032 |
| Ifenprodil tartrate              | 23210-58-4  | -0.5016 |
| Ethisterone                      | 434-03-7    | -0.5015 |
| Melatonin                        | 73-31-4     | -0.4992 |
| Isoxsuprine hydrochloride        | 579-56-6    | -0.4968 |
| Thiamine hydrochloride           | 67-03-8     | -0.4965 |
| Erlotinib                        | 183321-74-6 | -0.4950 |
| D-cycloserine                    | 68-41-7     | -0.4939 |
| Repaglinide                      | 135062-02-1 | -0.4904 |
| Iproniazide phosphate            | 305-33-9    | -0.4898 |
| Retinoic acid                    | 302-79-4    | -0.4869 |
| Sulfinpyrazone                   | 57-96-5     | -0.4839 |
| Zoxazolamine                     | 61-80-3     | -0.4811 |
| Etofenamate                      | 30544-47-9  | -0.4795 |
| Guaiacol                         | 90-05-1     | -0.4779 |
| Secnidazole                      | 3366-95-8   | -0.4759 |
| Cromolyn disodium salt           | 15826-37-6  | -0.4755 |
| Naftopidil dihydrochloride       | 57149-08-3  | -0.4752 |
| Lomefloxacin hydrochloride       | 98079-52-8  | -0.4746 |
| Propafenone hydrochloride        | 34183-22-7  | -0.4745 |
| Ciprofibrate                     | 52214-84-3  | -0.4737 |
| Scopolamin-N-oxide hydrobromide  | 6106-81-6   | -0.4669 |
| Benzamil hydrochloride           | 2898-76-2   | -0.4662 |
| Tolvaptan                        | 150683-30-0 | -0.4655 |
| Butylscopolammonium (n-) bromide | 149-64-4    | -0.4623 |
| Cefmetazole sodium salt          | 56796-39-5  | -0.4579 |
| Estradiol-17 beta                | 50-28-2     | -0.4514 |
| Isoetharine mesylate salt        | 7279-75-6   | -0.4514 |
| Methoxamine hydrochloride        | 61-16-5     | -0.4493 |
| Phenoxybenzamine hydrochloride   | 63-92-3     | -0.4490 |
| Pindolol                         | 13523-86-9  | -0.4453 |
| Zoledronic acid hydrate          | 165800-06-6 | -0.4448 |
| Sisomicin sulfate                | 53179-09-2  | -0.4438 |
| Tolnaftate                       | 2398-96-1   | -0.4420 |
| Demeclocycline hydrochloride     | 64-73-3     | -0.4350 |
| Pinaverium bromide               | 53251-94-8  | -0.4347 |
| Lomerizine hydrochloride         | 101477-54-7 | -0.4274 |
| Pyrazinamide                     | 98-96-4     | -0.4241 |
| Isosorbide dinitrate             | 87-33-2     | -0.4236 |
| Hydrochlorothiazide              | 58-93-5     | -0.4230 |

|                                                   |                       |         |
|---------------------------------------------------|-----------------------|---------|
| LAPACHOL METHYL ETHER                             | 17241-45-1            | -1.0486 |
| NORSTICTIC ACID                                   | 571-67-5              | -1.0468 |
| GLAFENINE                                         | 3820-67-5             | -1.0459 |
| ESTRADIOL-3-SULFATE, SODIUM SALT                  | 4999-79-5             | -1.0456 |
| APOCYNIN                                          | 498-02-2              | -1.0439 |
| 7-OXOCALLITRISIC ACID, METHYL ESTER               | 155473-19-1 (acid)    | -1.0394 |
| CEFIDTORIN PIVOXIL                                | 117467-28-4           | -1.0382 |
| TOTAROL-19-CARBOXYLIC ACID, METHYL ESTER          |                       | -1.0324 |
| CARBETAPENTANE CITRATE                            | 23142-01-0, 77-23-6 [ | -1.0300 |
| HYDROXYCHLOROQUINE SULFATE                        | 747-36-4, 118-42-3 [h | -1.0290 |
| 11(12)-EPOXY-URSOLOLACTONE ACETATE                |                       | -1.0272 |
| METHYLDOPA                                        | 41372-08-1            | -1.0272 |
| HESPERIDIN                                        | 520-26-3              | -1.0258 |
| LOBELINE HYDROCHLORIDE                            | 90-69-7               | -1.0243 |
| N-METHYL (-)-EPHEDRINE [1R,2S]                    | 552-79-4              | -1.0242 |
| 3-beta-ACETOXYALLOPREG-16-EN-20-ONE               |                       | -1.0238 |
| TOMATIDINE HYDROCHLORIDE                          | 69004-03-1            | -1.0234 |
| CYSTINE                                           | 56-89-3               | -1.0229 |
| TRYPAN BLUE                                       | 72-57-1               | -1.0227 |
| SUCCINYLLACETONE                                  | 51568-18-4            | -1.0221 |
| ETHYL VANILLIN                                    | 121-32-4              | -1.0205 |
| APIOLE                                            | 523-80-8              | -1.0154 |
| FUSARIC ACID                                      | 536-69-6              | -1.0118 |
|                                                   |                       | -1.0116 |
| METAMECONINE                                      | 531-88-4              | -1.0104 |
| DIALLYL TRISULFIDE                                | 2050-87-5             | -1.0078 |
| 3alpha-HYDROXY-4,4-BISNOR-8,11,13-PODOCARPATRIENE |                       | -1.0075 |
| PHENETHYLAMINE HYDROCHLORIDE                      | 156-28-5, 64-04-0 (ba | -1.0065 |
| PIPERIC ACID                                      | 5285-18-7             | -1.0057 |
| BENZOHYDROXAMIC ACID                              | 495-18-1              | -0.9999 |
| GLYCYRRHIZIC ACID, AMMONIUM SALT                  | 1405-86-3             | -0.9909 |
| OXAPROZIN                                         | 21256-18-8            | -0.9908 |
| METFORMIN HYDROCHLORIDE                           | 1115-70-4             | -0.9815 |
| RIFAMPIN                                          | 13292-46-1            | -0.9815 |
| 2-HYDROXY-3,4-DIMETHOXYBENZOIC ACID               | 5653-46-3             | -0.9811 |
| DEACETOXY-7-OXOGEDUNIN                            | 13072-74-7            | -0.9801 |
| LANOSTEROL ACETATE                                | 2671-68-3             | -0.9792 |
| 4'-METHOXYFLAVONE                                 | 4143-74-2             | -0.9778 |
| 3,7-DIMETHOXYFLAVONE                              | 20950-52-1            | -0.9759 |
| PAROXYPROPIONE                                    | 70-70-2               | -0.9725 |
| LAGOCHILIN                                        | 23554-81-6            | -0.9711 |
| LANOSTEROL                                        | 79-63-0               | -0.9710 |
| CARBINOXAMINE MALEATE                             | 3505-38-2, 486-16-8 [ | -0.9702 |
| PYROGALLIN                                        |                       | -0.9623 |
| 5,4'-DIMETHOXY-7-HYDROXYISOFLAVONE                | 68939-22-0            | -0.9588 |
| DIHYDROERGOTAMINE MESYLATE                        | 6190-39-2             | -0.9577 |
| SQUALENE thiourea clathrate                       | 111-02-4              | -0.9571 |
| GLUCITOL-4-GLUCOPYANOSIDE                         |                       | -0.9537 |
| IMIPRAMINE HYDROCHLORIDE                          | 113-52-0              | -0.9534 |
| AVOCATIN A                                        |                       | -0.9532 |
| ISAXONINE                                         | 4214-72-6             | -0.9447 |
| BAZEDOXIFENE ACETATE                              | 198481-33-3           | -0.9420 |
| DERRUSNIN                                         | 14736-62-0            | -0.9414 |
| CHLORHEXIDINE DIHYDROCHLORIDE                     | 3697-42-5, 55-56-1 [c | -0.9411 |
| CAPOBENIC ACID                                    | 21434-91-3            | -0.9403 |
| L(+/-)-ALLIIN                                     | 556-27-4(-)           | -0.9396 |
| TRANLYCYPROMINE SULFATE                           | 13492-01-8, 155-09-9  | -0.9359 |
| FERROUS FUMARATE                                  | 141-01-5              | -0.9301 |
| 2,6-DIHYDROXY-4-METHOXYTOLUENE                    |                       | -0.9293 |
| 16beta-METHYL-16(17)-EPOXY-5-PREGNENOLONE         |                       | -0.9286 |
| POSACONAZOLE                                      | 171228-49-2           | -0.9243 |
| SALICYL ALCOHOL                                   | 90-01-7               | -0.9237 |
| VANITOLID                                         | 17692-71-6            | -0.9219 |
| RISEDRONATE SODIUM                                | 115436-72-1           | -0.9214 |
| CAFFEINE HYDROBROMIDE                             | 5743-18-0             | -0.9207 |
| ESTRONE                                           | 53-16-7               | -0.9195 |
| AMINOTHIAZOLE                                     | 96-50-4               | -0.9189 |
| ELTROMBOPAG                                       | 496775-61-2           | -0.9163 |
| CARBADOX                                          | 1791337               | -0.9143 |
| EPICATECHIN PENTAACETATE                          |                       | -0.9138 |
| GLUCOSAMINIC ACID                                 | 3646-68-2             | -0.9102 |
| HAEMATOKYLIN PENTAACETATE                         |                       | -0.9102 |
| DEBRISOQUIN SULFATE                               | 581-88-4              | -0.9070 |
| CATECHIN PENTAACETATE                             |                       | -0.9065 |

|                                    |             |         |
|------------------------------------|-------------|---------|
| Donepezil hydrochloride            | 120011-70-3 | -0.4205 |
| Chlortetracycline hydrochloride    | 64-72-2     | -0.4185 |
| Dehydroisoandrosterone 3-acetate   | 853-23-6    | -0.4152 |
| Benoxinate hydrochloride           | 5987-82-6   | -0.4125 |
| Naltrexone hydrochloride dihydrate | 16676-29-2  | -0.4071 |
| Brompheniramine maleate            | 980-71-2    | -0.4071 |
| Zomepirac sodium salt              | 64092-48-4  | -0.4048 |
| Anthralin                          | 1143-38-0   | -0.4013 |
| Hydralazine hydrochloride          | 304-20-1    | -0.4008 |
| Acetohexamide                      | 968-81-0    | -0.3960 |
| Amphotericin B                     | 1397-89-3   | -0.3948 |
| Acarbose                           | 56180-94-0  | -0.3932 |
| Pregnenolone                       | 145-13-1    | -0.3892 |
| Cefotiam hydrochloride             | 61622-34-2  | -0.3889 |
| Sulfachloropyridazine              | 80-32-0     | -0.3872 |
| Propofol                           | 2078-54-8   | -0.3869 |
| Guanabenz acetate                  | 23256-50-0  | -0.3863 |
| Flunisolide                        | 542449      | -0.3832 |
| Metformin hydrochloride            | 1115-70-4   | -0.3831 |
| Trolox                             | 53188-07-1  | -0.3807 |
| Hydroxychloroquine sulfate         | 747-36-4    | -0.3805 |
| Hemicholinium bromide              | 312-45-8    | -0.3784 |
| Isoniazid                          | 54-85-3     | -0.3764 |
| Ropinirole hydrochloride           | 91374-20-8  | -0.3753 |
| Pyridoxine hydrochloride           | 58-56-0     | -0.3744 |
| Cefepime hydrochloride             | 123171-59-5 | -0.3693 |
| Hydrocortisone base                | 50-23-7     | -0.3690 |
| Diflorasone Diacetate              | 33564-31-7  | -0.3678 |
| Thiopramide maleate                | 106243-16-7 | -0.3667 |
| Fluocinonide                       | 356-12-7    | -0.3629 |
| Rosiglitazone Hydrochloride        | 122320-73-4 | -0.3624 |
| Trapidil                           | 15421-84-8  | -0.3620 |
| Aceclidine Hydrochloride           | 6109-70-2   | -0.3616 |
| Piperacillin sodium salt           | 59703-84-3  | -0.3592 |
| Nifuroxazide                       | 965-52-6    | -0.3560 |
| Etodolac                           | 41340-25-4  | -0.3546 |
| Guanadrel sulfate                  | 22195-34-2  | -0.3539 |
| Yohimbine hydrochloride            | 65-19-0     | -0.3518 |
| S-(+)-ibuprofen                    | 51146-56-6  | -0.3498 |
| Camylofine chlorhydrate            | 54-30-8     | -0.3471 |
| Nilvadipine                        | 75530-68-6  | -0.3434 |
| Tocainide hydrochloride            | 71395-14-7  | -0.3433 |
| Nitrendipine                       | 39562-70-4  | -0.3410 |
| Dichlorphenamide                   | 120-97-8    | -0.3397 |
| Deoxycorticosterone                | 64-85-7     | -0.3395 |
| Cilnidipine                        | 132203-70-4 | -0.3356 |
| Theobromine                        | 83-67-0     | -0.3346 |
| Captopril                          | 62571-86-2  | -0.3305 |
| Cyanocobalamin                     | 68-19-9     | -0.3277 |
| Tiaprofenic acid                   | 33005-95-7  | -0.3263 |
| Nitazoxanide                       | 55981-09-4  | -0.3260 |
| Dexfenfluramine hydrochloride      | 3239-45-0   | -0.3236 |
| Ethoxzolamide                      | 452-35-7    | -0.3206 |
| (R) -Naproxen sodium salt          | 23979-41-1  | -0.3201 |
| Alizapride hydrochloride           | 59338-87-3  | -0.3197 |
| Galanthamine hydrobromide          | 19453       | -0.3181 |
| loversol                           | 87771-40-2  | -0.3170 |
| 4-aminosalicylic acid              | 65-49-6     | -0.3099 |
| Bucladesine sodium salt            | 16980-89-5  | -0.3074 |
| Glimepiride                        | 93479-97-1  | -0.3044 |
| Zolmitriptan                       | 139264-17-8 | -0.3044 |
| Metoclopramide monohydrochloride   | 7232-21-5   | -0.3028 |
| Finasteride                        | 98319-26-7  | -0.3027 |
| Tripelennamine hydrochloride       | 154-69-8    | -0.3027 |
| Atropine sulfate monohydrate       | 5908-99-6   | -0.3025 |
| Tibolone                           | 5630-53-5   | -0.3016 |
| Zonisamide                         | 68291-97-4  | -0.3008 |
| Cefotaxime sodium salt             | 64485-93-4  | -0.2996 |
| Methylergometrine maleate          | 57432-61-8  | -0.2993 |
| Probucof                           | 23288-49-5  | -0.2968 |
| Terazosin hydrochloride            | 63590-64-7  | -0.2966 |
| Pronethalol hydrochloride          | 51-02-5     | -0.2965 |
| Leflunomide                        | 75706-12-6  | -0.2938 |
| Nefopam hydrochloride              | 23327-57-3  | -0.2925 |

|                                       |                        |         |
|---------------------------------------|------------------------|---------|
| HYDROXYTACRINE MALEATE                | 118909-22-1            | -0.9043 |
| QUINIZARIN                            | 81-64-1                | -0.9038 |
| ANTAZOLINE PHOSPHATE                  | 91-75-8                | -0.9029 |
| DIPYROCETYL                           | 486-79-3               | -0.9015 |
| ETHOPABATE                            | 59-06-3                | -0.8999 |
| MUSCAMONE                             | 27519-02-4             | -0.8975 |
| GLUTAMINE (L) HYDROCHLORIDE           | 56-85-9                | -0.8962 |
| VOGLIBOSE                             | 83480-29-9             | -0.8958 |
| N-HYDROXYMETHYLNICOTINAMIDE           | 3569-99-1              | -0.8945 |
| SODIUM LACTATE                        | 72-17-3                | -0.8924 |
| DUARTIN (-)                           | 52305-04-1             | -0.8863 |
| DIHYDROSTREPTOMYCIN SESQUISULFATE [5] | 128-46-1               | -0.8856 |
| OLONIUM CHLORIDE                      | 92-31-9                | -0.8852 |
| ASTAXANTHIN                           | 71772-51-5             | -0.8846 |
| SALVINORIN A                          | 83729-01-5             | -0.8833 |
| AMISULPRIDE                           | 71675-85-9             | -0.8811 |
| PHLORETIN                             | 60-82-2                | -0.8800 |
| VINCAMINE                             | 1617-90-9              | -0.8800 |
| YOHIMBIC ACID HYDRATE                 | 522-87-2               | -0.8792 |
| NORCANTHARIDIN                        |                        | -0.8785 |
| LAWSONE                               | 83-72-7                | -0.8772 |
| KHELLIN                               | 82-02-0                | -0.8764 |
| BIOCHANIN A, 7-METHYL ETHER           | 34086-51-6             | -0.8756 |
| BUFLOMEDIL HYDROCHLORIDE              | 35543-24-9, 55837-25   | -0.8718 |
| VANILLIN                              | 121-33-5               | -0.8698 |
| COLISTIN SULFATE                      | 1264-72-8              | -0.8683 |
| ATORVASTATIN CALCIUM                  | 134523-03-8            | -0.8624 |
| ZOXAZOLAMINE                          | 61-80-3                | -0.8622 |
| 3beta-ACETOXYDEOXODIHYDROGEDUNIN      |                        | -0.8609 |
| CHLORTETRACYCLINE HYDROCHLORIDE       | 64-72-2                | -0.8607 |
| ETHIONINE                             | 67-21-0                | -0.8568 |
| TROPISETRON HYDROCHLORIDE             | 105826-92-4            | -0.8568 |
| ACETAMINOSALOL                        | 118-57-0               | -0.8502 |
| ISOBERGAPTEN                          | 482-48-4               | -0.8501 |
| 7,4'-DIHYDROXYFLAVONE                 | 2196-14-7              | -0.8486 |
| SULFATHIAZOLE                         | 72-14-0                | -0.8477 |
| MEFENAMIC ACID                        | 61-68-7                | -0.8437 |
| ACIPIMOX                              | 51037-30-0             | -0.8427 |
| DESIPRAMINE HYDROCHLORIDE             | 58-28-6, 50-47-5 [des] | -0.8418 |
| OMEGA-3-ACID ESTERS (EPA shown)       | 86227-47-6             | -0.8405 |
| TRIMETHOPRIM                          | 738-70-5               | -0.8405 |
| SOLIDAGENONE                          | 23534-56-7             | -0.8382 |
| IMIDAZOL-4-YLACETIC ACID SODIUM SALT  | 56368-58-2             | -0.8373 |
| KETOTIFEN FUMARATE                    | 34580-14-8             | -0.8343 |
| PENICILLAMINE METHYL ESTER HYDROCHLO  | 34297-27-3             | -0.8323 |
| KOPARIN 2,3-DIMETHYL ETHER            |                        | -0.8316 |
| MENTHONE                              | 14073-97-3             | -0.8277 |
| 11a-ACETOXYPROGESTERONE               | 2268-98-6              | -0.8276 |
| EZETIMIBE                             | 163222-33-1            | -0.8267 |
| BENZOYL PEROXIDE                      | 94-36-0                | -0.8252 |
| PARGYLINE HYDROCHLORIDE               | 306-07-0               | -0.8243 |
| PYROCATECHUIC ACID                    | 303-38-8               | -0.8238 |
| XANTHYLETIN                           | 553-19-5               | -0.8232 |
| NALIDIXIC ACID                        | 389-08-2, 3374-05-8 [  | -0.8223 |
| AMINOCYCLOPROPANECARBOXYLIC ACID      | 68781-13-5             | -0.8195 |
| TADALAFIL                             | 171596-29-5            | -0.8179 |
| PENTAMIDINE ISETHIONATE               | 100-33-4               | -0.8154 |
| LAPACHENOL                            | 573-13-7               | -0.8145 |
| 7,2'-DIHYDROXYFLAVONE                 | 77298-66-9             | -0.8138 |
| DIHYDROJASMONIC ACID, METHYL ESTER    | 24851-98-7             | -0.8106 |
| JASMONE                               | 488-10-8               | -0.8104 |
| 3-AMINO-1,2,4-TRIAZOLE                | 61-82-5                | -0.8096 |
| PRIDINOL METHANESULFONATE             | 511-45-5               | -0.8091 |
| PHENAZOPYRIDINE HYDROCHLORIDE         | 136-40-3, 94-78-0 [ph  | -0.8079 |
| 3-METHOXYCATECHOL                     | 934-00-9               | -0.8033 |
| PHTHALYLSULFATHIAZOLE                 | 85-73-4                | -0.8019 |
| 6-AZATHYMINE                          | 932-53-6               | -0.8005 |
| ACTEIN                                | 18642-44-9             | -0.8005 |
| ANHYDROBRAZILIC ACID                  |                        | -0.8005 |
| ARTESUNATE                            | 182824-33-5            | -0.7997 |
| ISOGUVACINE HYDROCHLORIDE             | 68547-87-7             | -0.7996 |
| CURCUMIN                              | 458-37-7               | -0.7991 |
| ODOQUINOL                             | 83-73-8                | -0.7991 |
| SODIUM THIOGLYCOLATE                  | 367-51-1               | -0.7973 |

|                               |             |         |
|-------------------------------|-------------|---------|
| Sulfameter                    | 651-06-9    | -0.2925 |
| Bisacodyl                     | 603-50-9    | -0.2891 |
| Flurandrenolide               | 1524-88-5   | -0.2876 |
| Clofilium tosylate            | 92953-10-1  | -0.2876 |
| Chlormadinone acetate         | 302-22-7    | -0.2829 |
| Acetazolamide                 | 59-66-5     | -0.2803 |
| Estropipate                   | 7280-37-7   | -0.2750 |
| Tripolidine hydrochloride     | 550-70-9    | -0.2740 |
| Trioxsalen                    | 3902-71-4   | -0.2739 |
| Amprenavir                    | 161814-49-9 | -0.2719 |
| Warfarin                      | 81-81-2     | -0.2714 |
| Zileuton                      | 111406-87-2 | -0.2698 |
| Butamben                      | 94-25-7     | -0.2674 |
| Aniracetam                    | 72432-10-1  | -0.2662 |
| Dobutamine hydrochloride      | 49745-95-1  | -0.2652 |
| Nilutamide                    | 63612-50-0  | -0.2639 |
| Phthalylsulfathiazole         | 85-73-4     | -0.2625 |
| Butylparaben                  | 94-26-8     | -0.2612 |
| Nalidixic acid sodium salt    | 538497      | -0.2612 |
| Sulfamethoxypyridazine        | 80-35-3     | -0.2611 |
| Dopamine hydrochloride        | 62-31-7     | -0.2559 |
| Prednisone                    | 53-03-2     | -0.2547 |
| Eprosartan mesylate           | 133040-01-4 | -0.2527 |
| Cefuroxime axetil             | 64544-07-6  | -0.2524 |
| Tranlycypromine hydrochloride | 1986-47-6   | -0.2497 |
| Hexylcaine hydrochloride      | 532-76-3    | -0.2468 |
| Tazarotene                    | 118292-40-3 | -0.2468 |
| Praziquantel                  | 55268-74-1  | -0.2438 |
| Nomegestrol acetate           | 58652-20-3  | -0.2437 |
| Sotalol hydrochloride         | 959-24-0    | -0.2423 |
| (R)-Propranolol hydrochloride | 13071-11-9  | -0.2421 |
| Bephenium hydroxynaphthoate   | 3818-50-6   | -0.2416 |
| Chlorpromazine hydrochloride  | 69-09-0     | -0.2396 |
| Paliperidone                  | 144598-75-4 | -0.2389 |
| Lidoflazine                   | 3416-26-0   | -0.2372 |
| Ethotoin                      | 86-35-1     | -0.2331 |
| Imipenem                      | 74431-23-5  | -0.2302 |
| Quinethazone                  | 73-49-4     | -0.2300 |
| Bicalutamide                  | 90357-06-5  | -0.2279 |
| Oxalamine citrate salt        | 1949-20-8   | -0.2233 |
| Benazepril hydrochloride      | 86541-74-4  | -0.2205 |
| Liothyronine                  | 1823692     | -0.2137 |
| Prothionamide                 | 14222-60-7  | -0.2075 |
| Isopyrin hydrochloride        | 18342-39-7  | -0.2072 |
| Methyldopate hydrochloride    | 2508-79-4   | -0.2054 |
| Flucytosine                   | 2022-85-7   | -0.2051 |
| Pranoprofen                   | 52549-17-4  | -0.2051 |
| Sulfadiazine                  | 68-35-9     | -0.2035 |
| Omeprazole                    | 73590-58-6  | -0.1998 |
| Chlorpheniramine maleate      | 113-92-8    | -0.1991 |
| Cinnarizine                   | 298-57-7    | -0.1987 |
| Tolterodine tartrate          | 209747-05-7 | -0.1975 |
| Sulfanilamide                 | 63-74-1     | -0.1973 |
| Ampyrone                      | 83-07-8     | -0.1972 |
| Carmofur                      | 61422-45-5  | -0.1943 |
| Piroxicam                     | 36322-90-4  | -0.1942 |
| Hexestrol                     | 84-16-2     | -0.1940 |
| Procarbazine hydrochloride    | 366-70-1    | -0.1938 |
| Diltiazem hydrochloride       | 33286-22-5  | -0.1902 |
| Alcuronium chloride           | 15180-03-7  | -0.1875 |
| Halofantrine hydrochloride    | 36167-63-2  | -0.1875 |
| Oxyphenbutazone               | 129-20-4    | -0.1875 |
| Formestane                    | 566-48-3    | -0.1845 |
| Moxalactam disodium salt      | 64953-12-4  | -0.1837 |
| Indinavir sulfate             | 157810-81-6 | -0.1807 |
| Dibenzepine hydrochloride     | 315-80-0    | -0.1781 |
| Mexiletine hydrochloride      | 1267397     | -0.1776 |
| Calcipotriene                 | 112965-21-6 | -0.1772 |
| Acebutolol hydrochloride      | 34381-68-5  | -0.1762 |
| Spiroolactone                 | 52-01-7     | -0.1732 |
| Butoconazole nitrate          | 32872-77-1  | -0.1731 |
| Flcainide acetate             | 54143-56-5  | -0.1724 |
| Itopride                      | 122898-67-3 | -0.1700 |
| N6-methyladenosine            | 1867-73-8   | -0.1682 |

|                                                   |                        |         |
|---------------------------------------------------|------------------------|---------|
| SULINDAC                                          | 38194-50-2             | -0.7960 |
| TRICHLORMETHIAZIDE                                | 133-67-5               | -0.7957 |
| NICORANDIL                                        | 65141-46-0             | -0.7953 |
| TRAMADOL HYDROCHLORIDE                            | 36282-47-0             | -0.7943 |
| CYCLOVERATRYLENE                                  |                        | -0.7899 |
| AZLOCILLIN SODIUM                                 | 37091-66-0             | -0.7898 |
| GARDENIN B                                        | 2798-20-1              | -0.7887 |
| OXYMETAZOLINE HYDROCHLORIDE                       | 2315-02-8, 1491-59-4   | -0.7884 |
| CHLOROBUTANOL                                     | 57-15-8                | -0.7868 |
| LEVULINIC ACID, 3-BENZYLIDENYL-                   |                        | -0.7850 |
| 2-HYDROXYXANTHONE                                 |                        | -0.7846 |
| CORYNANTHINE                                      | 123333-62-0            | -0.7825 |
| IOPANIC ACID                                      | 96-83-3                | -0.7824 |
| BIOCHANIN A                                       | 491-80-5               | -0.7823 |
| ISOFLUPREDONE ACETATE                             | 338-98-7               | -0.7823 |
| FROVATRIPTAN SUCCINATE                            | 158747-02-5            | -0.7820 |
| 1R,2S-PHENYLPROPYLAMINE                           | 14838-15-4             | -0.7818 |
| DIPTERYXIN                                        | 53948-01-9             | -0.7802 |
| ISOROTENONE                                       | 549-22-4               | -0.7802 |
| OXTRIPHYLLINE                                     | 4499-40-5              | -0.7787 |
| ACETYLSALICYLANILIDE                              | 87-17-2                | -0.7784 |
| ESTRONE BENZOATE                                  | 2393-53-5              | -0.7780 |
| BISPHENOL A                                       | 80-05-7                | -0.7773 |
| NONIC ACID                                        |                        | -0.7771 |
| MITRAPHYLLINE                                     | 509-80-8               | -0.7714 |
| 4'-HYDROXYFLAVANONE                               |                        | -0.7671 |
| SULFINPYRAZONE                                    | 57-96-5                | -0.7600 |
| 2-HYDROXY-4-BENZOYLOXYPROPIOPHENONE               |                        | -0.7584 |
| EFLOXATE                                          | 119-41-5               | -0.7582 |
| SALSOLIDINE                                       | 493-48-1               | -0.7582 |
| EPIGALLOTECHIN                                    | 970-74-1               | -0.7565 |
| GLYCYRRHIZIN                                      | 1405-86-3              | -0.7553 |
| CARAPIN-8(9)-ENE                                  |                        | -0.7538 |
| UREA                                              | 57-13-6                | -0.7520 |
| LOPINAVIR                                         | 192725-17-0            | -0.7506 |
| TROPINE                                           | 120-29-6               | -0.7497 |
| FENIPENTOL                                        | 583-03-9               | -0.7463 |
| LEVOSIMENDAN                                      | 141505-33-1            | -0.7455 |
| TRYPTOPHAN (D)                                    | 153-94-6               | -0.7430 |
| AURIN TRICARBOXYLIC ACID                          | 4431-00-9              | -0.7421 |
| DEOXYCHOLIC ACID                                  | 88-44-3                | -0.7413 |
| L-SERYL-L-GLUTAMINE                               | 94421-66-6             | -0.7413 |
| 4-HYDROXYANTIPYRINE                               | 1672-63-5              | -0.7408 |
| TROLOX                                            | 53188-07-1             | -0.7389 |
| 3,7-EPOXYCARYOPHYLLAN-6-OL                        |                        | -0.7387 |
| EPIGALLOTECHIN-3-MONOGALLATE                      | 989-51-5               | -0.7356 |
| ETHYL ORSELLINATE                                 | 2524-37-0              | -0.7330 |
| CHRYSAROBIN                                       | 491-58-7               | -0.7327 |
| 5,7,4'-TRIMETHOXYFLAVONE                          | 5631-70-9              | -0.7309 |
| THREONINE (L)                                     | 72-19-5                | -0.7306 |
| MEPIROXOL                                         | 6968-72-5              | -0.7304 |
| HECOGENIN                                         | 467-55-0               | -0.7297 |
| CEPHALOSPORIN C Zn                                | 61-24-5                | -0.7291 |
| TIGOGENIN                                         | 77-60-1                | -0.7283 |
| 2',4'-DIHYDROXYCHALCONE                           | 13323-66-5             | -0.7274 |
| CYCLIZINE                                         | 82-92-8                | -0.7246 |
| CHOLESTERYL ACETATE                               | 604-35-3               | -0.7236 |
| COUMARIN                                          | 91-64-5                | -0.7234 |
| EPIAFZELECHIN TRIMETHYL ETHER                     |                        | -0.7226 |
| EPROBEMIDE                                        | 87940-60-1             | -0.7210 |
| 2-MERCAPTOETHANOL                                 | 60-24-2                | -0.7180 |
| CELLOBIOSE (D[+])                                 | 528-50-7               | -0.7154 |
| DYPHYLLINE                                        | 479-18-5               | -0.7150 |
| PROTRYPTILINE HYDROCHLORIDE                       | 1225-55-4              | -0.7136 |
| 7,2'-DIMETHOXYFLAVONE                             |                        | -0.7116 |
| PIPERINE                                          | 94-62-2                | -0.7110 |
| REBAMIPIDE                                        | 90098-04-7             | -0.7096 |
| BETULIN                                           | 473-98-3               | -0.7084 |
| IOXILAN                                           | 107793-72-6            | -0.7057 |
| 13-METHYL-4,4-BISNOR-8,11,13-PODOCARPATRIEN-3-ONE |                        | -0.7003 |
| OLEANOLIC ACID                                    | 508-02-1               | -0.6991 |
| OXOLAMINE CITRATE                                 | 959-14-8 (base)        | -0.6986 |
| PRAMOXINE HYDROCHLORIDE                           | 637-58-1, 140-65-8 [p] | -0.6975 |
| ORLISTAT                                          | 96829-58-2             | -0.6972 |



|                                          |             |         |
|------------------------------------------|-------------|---------|
| Diosmin                                  | 520-27-4    | -0.1674 |
| Ascorbic acid                            | 50-81-7     | -0.1663 |
| Procainamide hydrochloride               | 614-39-1    | -0.1630 |
| Meprylcaine hydrochloride                | 956-03-6    | -0.1622 |
| Amrinone                                 | 60719-84-8  | -0.1621 |
| Isradipine                               | 75695-93-1  | -0.1573 |
| Heptaminol hydrochloride                 | 543-15-7    | -0.1539 |
| Tigecycline                              | 220620-09-7 | -0.1538 |
| Moricizine hydrochloride                 | 31883-05-3  | -0.1529 |
| Tetraethylenepentamine pentahydrochlorid | 4961-41-5   | -0.1480 |
| Pepstatin A                              | 26305-03-3  | -0.1453 |
| Mephenytoin                              | 50-12-4     | -0.1447 |
| Nicosamide                               | 50-65-7     | -0.1427 |
| Kanamycin A sulfate                      | 25389-94-0  | -0.1397 |
| Fosfosal                                 | 6064-83-1   | -0.1395 |
| Carbadox                                 | 1791337     | -0.1389 |
| Indapamide                               | 26807-65-8  | -0.1389 |
| Oxandrolone                              | 53-39-4     | -0.1389 |
| Iopromide                                | 73334-07-3  | -0.1373 |
| Sulfisoxazole                            | 127-69-5    | -0.1363 |
| Methicillin sodium                       | 7246-14-2   | -0.1334 |
| Racepinephrine hydrochloride             | 329-63-5    | -0.1330 |
| Alfadolone acetate                       | 23930-37-2  | -0.1316 |
| Gliquidone                               | 33342-05-1  | -0.1308 |
| Oxybenzone                               | 131-57-7    | -0.1293 |
| Alprostadil                              | 745-65-3    | -0.1289 |
| Meptazinol hydrochloride                 | 59263-76-2  | -0.1212 |
| Ketoprofen                               | 22071-15-4  | -0.1204 |
| Ticarcillin sodium                       | 74682-62-5  | -0.1199 |
| Carbarsone                               | 121-59-5    | -0.1182 |
| Erythromycin                             | 114-07-8    | -0.1155 |
| Valdecoxib                               | 181695-72-7 | -0.1120 |
| Trichlormethiazide                       | 133-67-5    | -0.1090 |
| Cilostazol                               | 73963-72-1  | -0.1069 |
| Moroxidine hydrochloride                 | 3160-91-6   | -0.1059 |
| Clofibric acid                           | 882-09-7    | -0.1030 |
| Cloxacillin sodium salt                  | 642-78-4    | -0.1016 |
| Naloxone hydrochloride                   | 357-08-4    | -0.1006 |
| Chlorthalidone                           | 77-36-1     | -0.1002 |
| Acetylsalicylsalicylic acid              | 530-75-6    | -0.0983 |
| Lidocaine hydrochloride                  | 73-78-9     | -0.0959 |
| Dofetilide                               | 115256-11-6 | -0.0941 |
| Etanidazole                              | 22668-01-5  | -0.0908 |
| Norgestrel(-)-D                          | 797-63-7    | -0.0899 |
| Dipyron                                  | 5907-38-0   | -0.0892 |
| Cefazolin sodium salt                    | 27164-46-1  | -0.0886 |
| Pravastatin                              | 81093-37-0  | -0.0884 |
| Edrophonium chloride                     | 116-38-1    | -0.0862 |
| Amiodarone hydrochloride                 | 19774-82-4  | -0.0860 |
| Zardaverine                              | 101975-10-4 | -0.0828 |
| Alendronate sodium                       | 121268-17-5 | -0.0825 |
| Furaltadone hydrochloride                | 3759-92-0   | -0.0824 |
| Bufexamac                                | 2438-72-4   | -0.0773 |
| D,L-Penicillamine                        | 52-66-4     | -0.0761 |
| Gallamine triethiodide                   | 65-29-2     | -0.0754 |
| Tirofiban hydrochloride                  | 150915-40-5 | -0.0746 |
| Levodopa                                 | 59-92-7     | -0.0728 |
| Decamethonium bromide                    | 541-22-0    | -0.0710 |
| Granisetron                              | 109889-09-0 | -0.0697 |
| Dacarbazine                              | 891986      | -0.0587 |
| Desonide                                 | 638-94-8    | -0.0574 |
| Minaprine dihydrochloride                | 25953-17-7  | -0.0568 |
| Cimetidine                               | 51481-61-9  | -0.0566 |
| Efavirenz                                | 154598-52-4 | -0.0549 |
| Fursultiamine Hydrochloride              | 2105-43-3   | -0.0534 |
| Tolmetin sodium salt dihydrate           | 64490-92-2  | -0.0529 |
| Terbinafine                              | 91161-71-6  | -0.0527 |
| Androsterone                             | 53-41-8     | -0.0510 |
| Bupivacaine hydrochloride                | 18010-40-7  | -0.0493 |
| Nicorandil                               | 65141-46-0  | -0.0475 |
| Medrysone                                | 2668-66-8   | -0.0466 |
| Pyrrithydione                            | 77-04-3     | -0.0436 |
| Homosalate                               | 118-56-9    | -0.0426 |
| Pralidoxime chloride                     | 51-15-0     | -0.0414 |

|                                       |                       |         |
|---------------------------------------|-----------------------|---------|
| RIVASTIGMINE TARTRATE                 | 123441-03-2           | -0.6946 |
| KAEMPFEROL                            | 520-18-3              | -0.6927 |
| CYTISINE                              | 485-35-8              | -0.6899 |
| NORDIHYDROGUARETIC ACID               | 500-38-9              | -0.6891 |
| ERGOSTEROL ACETATE                    | 2418-45-3             | -0.6877 |
| BOLDINE                               | 476-70-0              | -0.6859 |
| OXIGLUTATIONE                         | 27025-41-8            | -0.6859 |
| BENZETHONIUM CHLORIDE                 | 121-54-0              | -0.6833 |
| ALLOPREGNANOLONE                      | 516-54-1              | -0.6826 |
|                                       |                       | -0.6824 |
| ALVERINE CITRATE                      | 5560-59-8, 150-59-4 [ | -0.6822 |
| PISCIDIC ACID                         | 35388-57-9            | -0.6818 |
| PIROMIDIC ACID                        | 19562-30-2            | -0.6769 |
| L-BUTHIONINE SULFOXIMINE              | 83730-53-4            | -0.6769 |
| TOLFENAMIC ACID                       | 13710-19-5            | -0.6766 |
| 4-FLUOROPHENYLACETIC ACID             | 156-06-9              | -0.6764 |
| DIPYRIDAMOLE                          | 58-32-2               | -0.6742 |
| LIPOAMIDE                             | 3206-73-3             | -0.6733 |
| ETHENZAMIDE                           | 938-73-8              | -0.6718 |
| METHYL ORSELLINATE                    | 3187-58-4             | -0.6717 |
| AZADRACHTIN                           | 11141-17-6            | -0.6709 |
| MYCOPHENOLATE MOFETIL                 | 115007-34-6           | -0.6702 |
| RISPERIDONE                           | 106266-06-2           | -0.6698 |
| CISPLATIN                             | 15663-27-1            | -0.6676 |
| SULFLURAMID                           | 4151-50-2             | -0.6667 |
| DICLORALUREA                          | 116-52-9              | -0.6666 |
| 6,3'-DIMETHOXYFLAVONE                 | 79786-40-6            | -0.6664 |
| CITICOLINE                            | 987-78-0              | -0.6648 |
| CEFALONIUM                            | 5575-21-3             | -0.6633 |
| DEFERIPRONE                           | 30652-11-0            | -0.6631 |
| FLUPIRTINE MALEATE                    | 75507-68-5            | -0.6631 |
| 4-METHYLESCULETIN                     | 529-84-0              | -0.6629 |
| CELECOXIB                             | 169590-42-5           | -0.6605 |
| PREDNISOLONE                          | 50-24-8 [anhydrous],  | -0.6601 |
| APHYLIC ACID                          | 642-67-1              | -0.6567 |
| MEXAMINE                              | 608-07-1              | -0.6567 |
| 7-DEACETOXY-7-OXOKHIVORIN             | 15004-51-0            | -0.6535 |
| EPRODISATE DISODIUM                   | 36589-58-9            | -0.6534 |
| MIMOSINE                              | 500-44-7              | -0.6505 |
| CITROPTEN                             | 487-06-9              | -0.6502 |
| METICRANE                             | 1084-65-7             | -0.6502 |
| UMBELLIFERONE                         | 93-35-6               | -0.6501 |
| PICEID                                | 27208-80-6            | -0.6500 |
| 6,2'-DIMETHOXYFLAVONE                 |                       | -0.6492 |
| alpha-LAPACHONE                       | 4707-33-9             | -0.6464 |
| DIHYDROGEDUNIN                        |                       | -0.6458 |
| PIPERIDOLATE HYDROCHLORIDE            | 129-77-1, 82-98-4 [pi | -0.6447 |
| BUTYLATED HYDROXYANISOLE              | 25013-16-5            | -0.6442 |
| TERAZOSIN HYDROCHLORIDE               | 70024-40-7            | -0.6439 |
| MEXICANOLIDE                          | 1915-67-9             | -0.6429 |
| HEXAMETHONIUM BROMIDE                 | 55-97-0, 60-26-4 [hex | -0.6427 |
| DIOSMIN                               | 520-27-4              | -0.6411 |
| ACETANILIDE                           | 103-84-4              | -0.6395 |
| IMIDACLOPRID                          | 13826-41-3            | -0.6390 |
| 2',4'-DIHYDROXY-6'-METHOXYACETOPHENOL | 3602-54-8             | -0.6384 |
| LOBENDAZOLE                           | 6306-71-4             | -0.6333 |
| LINDANE                               | 58-89-9               | -0.6328 |
| BIXIN                                 | 39937-23-0            | -0.6325 |
| DES Loratadine Hydrochloride          | 100643-71-8(base)     | -0.6322 |
| Sorbitol                              | 50-70-4               | -0.6313 |
| LUPANINE PERCHLORATE                  | 550-90-3 (base)       | -0.6301 |
| ELLAGIC ACID                          | 476-66-4              | -0.6287 |
| EUDESMIC ACID                         | 118-41-2              | -0.6276 |
| OXINIACIC ACID                        | 2398-81-4             | -0.6257 |
| FENCLOLINE (+/-)                      | 7424-00-2(dl); 14173- | -0.6256 |
| NOBILETIN                             | 478-01-3              | -0.6246 |
| ERDOSTEINE                            | 84611-23-4            | -0.6242 |
| CYCLOCREATINE                         | 35404-50-3            | -0.6234 |
| CHLOROPYRAMINE HYDROCHLORIDE          | 6170-42-9, 59-32-5 (b | -0.6215 |
| MEPENZOLATE BROMIDE                   | 76-90-4, 25990-43-6 [ | -0.6213 |
| DEHYDRODIHYDROROTENONE                | 6659-45-6             | -0.6186 |
| LACITOL                               | 585-86-4, 81025-04-9  | -0.6168 |
| METHYL 7-DESHYDROXYPYROGALLIN-4-CAR   | 77-41-8               | -0.6167 |
| NEFOPAM                               | 23327-57-3, 13669-70  | -0.6158 |

|                                            |             |         |
|--------------------------------------------|-------------|---------|
| Tiratricol, 3,3',5-triiodothyroacetic acid | 51-24-1     | -0.0408 |
| Oxcarbazepine                              | 28721-07-5  | -0.0390 |
| Dantrolene sodium salt                     | 14663-23-1  | -0.0383 |
| Prednisolone                               | 50-24-8     | -0.0383 |
| Fludrocortisone acetate                    | 514-36-3    | -0.0377 |
| Doxazosin mesylate                         | 77883-43-3  | -0.0365 |
| Nomifensine maleate                        | 32795-47-4  | -0.0364 |
| (-)-Eseroline fumarate salt                | 104015-29-4 | -0.0353 |
| Atorvastatin                               | 134523-00-5 | -0.0348 |
| Niacin                                     | 59-67-6     | -0.0344 |
| Diethylcarbamazine citrate                 | 1642-54-2   | -0.0330 |
| Benfluorex                                 | 23602-78-0  | -0.0311 |
| Pentoxifylline                             | 1677687     | -0.0308 |
| Azatadine maleate                          | 3978-86-7   | -0.0290 |
| Sulfathiazole                              | 72-14-0     | -0.0280 |
| Fluticasone propionate                     | 80474-14-2  | -0.0271 |
| Nicotinamide                               | 98-92-0     | -0.0252 |
| Sulfaphenazole                             | 526-08-9    | -0.0242 |
| Bifonazole                                 | 60628-96-8  | -0.0223 |
| Ethacrynic acid                            | 58-54-8     | -0.0211 |
| Methimazole                                | 60-56-0     | -0.0174 |
| Cefpiramide                                | 70797-11-4  | -0.0163 |
| Beta-Escin                                 | 11072-93-8  | -0.0148 |
| Cisapride                                  | 81098-60-4  | -0.0139 |
| Remoxipride Hydrochloride                  | 73220-03-8  | -0.0118 |
| Dexamethasone acetate                      | 1177-87-3   | -0.0114 |
| Phenindione                                | 83-12-5     | -0.0069 |
| Proguanil hydrochloride                    | 637-32-1    | -0.0060 |
| Cefoxitin sodium salt                      | 33564-30-6  | -0.0018 |
| Triclabendazole                            | 68786-66-3  | -0.0015 |
| Cefadroxil                                 | 50370-12-2  | -0.0011 |
| Tolbutamide                                | 64-77-7     | -0.0011 |
| Droperidol                                 | 548-73-2    | 0.0006  |
| Mianserine hydrochloride                   | 21535-47-7  | 0.0015  |
| Losartan                                   | 114798-26-4 | 0.0056  |
| Iodipamide                                 | 606-17-7    | 0.0065  |
| Pirenzepine dihydrochloride                | 29868-97-1  | 0.0071  |
| Folinic acid calcium salt                  | 6035-45-6   | 0.0079  |
| Rufloxacin                                 | 101363-10-4 | 0.0093  |
| Amorolfine hydrochloride                   | 78613-38-4  | 0.0105  |
| 1,8-Dihydroxyanthraquinone                 | 117-10-2    | 0.0106  |
| Risperidone                                | 106266-06-2 | 0.0107  |
| Dimethadione                               | 695-53-4    | 0.0115  |
| Scopolamine hydrochloride                  | 55-16-3     | 0.0115  |
| Azithromycin                               | 83905-01-5  | 0.0123  |
| Pergolide mesylate                         | 66104-23-2  | 0.0130  |
| Nadolol                                    | 42200-33-9  | 0.0143  |
| Zopiclone                                  | 43200-80-2  | 0.0151  |
| N-Acetyl-DL-homocysteine Thiolactone       | 1195-16-0   | 0.0172  |
| Actarit                                    | 18699-02-0  | 0.0188  |
| Ranolazine                                 | 95635-55-5  | 0.0188  |
| Streptomycin sulfate                       | 3810-74-0   | 0.0199  |
| Phenylbutazone                             | 50-33-9     | 0.0211  |
| Phenethicillin potassium salt              | 132-93-4    | 0.0212  |
| Adiphenine hydrochloride                   | 50-42-0     | 0.0250  |
| Triamcinolone                              | 124-94-7    | 0.0250  |
| Bromocryptine mesylate                     | 22260-51-1  | 0.0262  |
| Etretinate                                 | 54350-48-0  | 0.0316  |
| Griseofulvin                               | 126-07-8    | 0.0335  |
| Zidovudine, AZT                            | 30516-87-1  | 0.0355  |
| Theophylline monohydrate                   | 5967-84-0   | 0.0364  |
| Stavudine                                  | 3056-17-5   | 0.0385  |
| Metaraminol bitartrate                     | 33402-03-8  | 0.0405  |
| Hexachlorophene                            | 70-30-4     | 0.0422  |
| Carbinoxamine maleate salt                 | 3505-38-2   | 0.0483  |
| Darunavir                                  | 635728-49-3 | 0.0495  |
| Nefazodone hydrochloride                   | 82752-99-6  | 0.0509  |
| Procaine hydrochloride                     | 51-05-8     | 0.0539  |
| Fenspiride hydrochloride                   | 1151830     | 0.0579  |
| Azaperone                                  | 1649-18-9   | 0.0593  |
| Pramipexole dihydrochloride                | 104632-25-9 | 0.0604  |
| Nateglinide                                | 105816-04-4 | 0.0606  |
| Merbromin                                  | 129-16-8    | 0.0621  |
| Fenipentol                                 | 583-03-9    | 0.0635  |

|                                            |                        |         |
|--------------------------------------------|------------------------|---------|
| FAST GREEN FCF                             | 2353-45-9              | -0.6154 |
| CHOLEST-5-EN-3-ONE                         | 601-54-7               | -0.6146 |
| PAEONOL                                    | 552-41-0               | -0.6139 |
| 7-NITROINDAZOLE                            | 2942-42-9              | -0.6136 |
| BENFLUOREX HYDROCHLORIDE                   | 23602-78-0             | -0.6106 |
| HYPOXANTHINE                               | 68-94-0                | -0.6106 |
| ZONISAMIDE                                 | 68291-97-4             | -0.6106 |
| PRALIDOXIME CHLORIDE                       | 51-15-0                | -0.6105 |
| SPHONDIN                                   | 483-66-9               | -0.6098 |
| PHENOBARBITAL                              | 50-06-6                | -0.6095 |
| PEMIROLAST POTASSIUM                       | 100299-08-9            | -0.6093 |
| CADAVERINE TARTRATE                        | 462-94-2(base)         | -0.6054 |
| TELMISARTAN                                | 144701-48-4            | -0.6047 |
| ETHOXYQUIN                                 |                        | -0.6043 |
| 3,4'-DIHYDROXYFLAVONE                      | 14919-49-4             | -0.6018 |
| HEMATEIN                                   | 475-25-2               | -0.6013 |
| NANOFIN                                    | 504-03-0               | -0.6012 |
| POMIFERIN DIMETHYL ETHER                   |                        | -0.6010 |
| SYMCLOSENE                                 | 87-90-1                | -0.5976 |
| NARINGIN                                   | 10236-47-2             | -0.5965 |
| GALANGIN                                   | 548-83-4               | -0.5948 |
| CARBACHOL                                  | 51-83-2                | -0.5930 |
| AMINOGUANIDINE SULFATE                     | 996-19-0               | -0.5929 |
| MATRINE                                    | 519-02-8               | -0.5912 |
| TRIADIMEFON                                | 43121-43-3             | -0.5910 |
| RITONAVIR                                  | 155213-67-5            | -0.5864 |
| 4-METHYLIMIDAZOLE                          | 822-36-6               | -0.5861 |
| CEFSULODIN SODIUM                          | 52152-93-9, 62587-73   | -0.5858 |
| CLOFOCTOL                                  | 37693-01-9             | -0.5854 |
| BUPIVACAINE HYDROCHLORIDE                  | 14252-80-3             | -0.5840 |
| 5-AMINOPENTANOIC ACID HYDROCHLORIDE        |                        | -0.5832 |
| VULPINIC ACID                              | 521-52-8               | -0.5820 |
| BUTOCONAZOLE                               | 64872-77-1, 64872-76   | -0.5817 |
| DINITOLMIDE                                | 148-01-6               | -0.5803 |
| CEPHARANTHINE                              | 481-49-2               | -0.5785 |
| CHLOROGENIC ACID                           | 327-97-9               | -0.5770 |
| ROPINIROLE HYDROCHLORIDE                   | 91374-21-9             | -0.5769 |
| L-CYSTINE                                  | 56-89-3                | -0.5756 |
| DESVENLAFAXINE SUCCINATE                   | 93413-62-8             | -0.5750 |
| DIFLUBENZURON                              | 35367-38-7             | -0.5737 |
| RAMELTEON                                  | 196597-26-9            | -0.5729 |
| BUMETANIDE                                 | 28395-03-1             | -0.5716 |
| NIFENAZONE                                 | 2139-47-1              | -0.5711 |
| beta-AMYRIN ACETATE                        | 1616-93-9              | -0.5707 |
| ISOTECTORIGENIN, 7-METHYL ETHER            |                        | -0.5679 |
| PHENACYLAMINE HYDROCHLORIDE                | 5468-37-1, 613-89-8(t  | -0.5658 |
| PHENOLPHTHALEIN                            | 77-09-8                | -0.5636 |
| CARZENIDE                                  | 138-41-0               | -0.5626 |
| BAMBUTEROL HYDROCHLORIDE                   | 81732-46-9             | -0.5624 |
| METHIONINE SULFOXIMINE (L)                 | 15985-39-4             | -0.5606 |
| TRIMETHOBENZAMIDE HYDROCHLORIDE            | 554-92-7, 138-56-7 (tr | -0.5582 |
| CLOZAPINE                                  | 5786-21-0              | -0.5576 |
| 3-AMINOPROPIONITRILE FUMARATE              | 2079-89-2              | -0.5571 |
| 3beta-HYDROXY-23,24-BISNORCHOL-5-ENIC ACID |                        | -0.5564 |
| BENACTYZINE HYDROCHLORIDE                  | 57-37-4                | -0.5560 |
| ICARIIN                                    | 489-32-7               | -0.5555 |
| DESACETYLCOLFORSIN                         | 64657-20-1             | -0.5554 |
| SOLANESYL ACETATE                          | 56000-93-4             | -0.5518 |
| TETRAHYDROZOLINE HYDROCHLORIDE             | 522-48-5, 84-22-0 (tet | -0.5508 |
| PRAXADINE HYDROCHLORIDE                    | 4023-02-3, 4023-00-1   | -0.5501 |
| ACETYLTRYPTOPHAN                           | 1218-34-4              | -0.5498 |
| 1,2alpha-EPOXYDEACETOXYDIHYDROGEDUNIN      |                        | -0.5496 |
| PERILLYL ALCOHOL                           | 536-59-4, 18457-55-1   | -0.5466 |
| PIRIBEDIL HYDROCHLORIDE                    | 622744                 | -0.5466 |
| PIRENPERONE                                | 75444-65-4             | -0.5465 |
| EPHEDRINE (1R,2S) HYDROCHLORIDE            | 50-98-6, 299-42-3 ((-) | -0.5450 |
| DIMINAZENE ACETURATE                       | 908-54-3               | -0.5445 |
| LINALOOL (+)                               | 78-70-6                | -0.5443 |
| PIPERACILLIN SODIUM                        | 59703-84-3, 66258-76   | -0.5413 |
| d-LIMONENE                                 | 138-86-7               | -0.5411 |
| DOCONEXENT                                 | 6217-54-5              | -0.5401 |
| DANTHRON                                   | 117-10-2               | -0.5376 |
| CEPHALEXIN                                 | 23325-78-2, 15686-71   | -0.5363 |
| CHRYSIN                                    | 480-40-0               | -0.5347 |

|                                            |             |        |
|--------------------------------------------|-------------|--------|
| Tolazoline hydrochloride                   | 59-97-2     | 0.0637 |
| Pargyline hydrochloride                    | 306-07-0    | 0.0638 |
| Diphepanil methylsulfate                   | 62-97-5     | 0.0670 |
| Glipizide                                  | 29094-61-9  | 0.0670 |
| Pivmecillinam hydrochloride                | 32887-03-9  | 0.0699 |
| Naproxen                                   | 22204-53-1  | 0.0702 |
| Guaiifenesin                               | 93-14-1     | 0.0703 |
| Rifaximin                                  | 80621-81-4  | 0.0706 |
| Fluconazole                                | 86386-73-4  | 0.0747 |
| Flumequine                                 | 42835-25-6  | 0.0761 |
| Gabapentin                                 | 60142-96-3  | 0.0764 |
| Silodosin                                  | 160970-54-7 | 0.0766 |
| Nalmefene hydrochloride                    | 58895-64-0  | 0.0769 |
| Bacitracin                                 | 1405-87-4   | 0.0789 |
| Candesartan                                | 139481-59-7 | 0.0790 |
| Dapsone                                    | 80-08-0     | 0.0795 |
| Lymecycline                                | 992-21-2    | 0.0798 |
| Estramustine                               | 2998-57-4   | 0.0817 |
| Sulconazole nitrate                        | 61318-91-0  | 0.0826 |
| Pefloxacin                                 | 70458-92-3  | 0.0843 |
| Niridazole                                 | 61-57-4     | 0.0847 |
| Sulpiride                                  | 15676-16-1  | 0.0848 |
| Oxiconazole Nitrate                        | 64211-46-7  | 0.0869 |
| Mecamylamine hydrochloride                 | 826-39-1    | 0.0885 |
| (-)-Isoproterenol hydrochloride            | 5984-95-2   | 0.0893 |
| Voriconazole                               | 137234-62-9 | 0.0920 |
| Telmisartan                                | 144701-48-4 | 0.0948 |
| Pinacidil                                  | 85371-64-8  | 0.0955 |
| Hymecromone                                | 90-33-5     | 0.0960 |
| Pancuronium bromide                        | 15500-66-0  | 0.0963 |
| Xamoterol hemifumarate                     | 73210-73-8  | 0.0967 |
| R(-) Apomorphine hydrochloride hemihydrate | 41372-20-7  | 0.0971 |
| Probenecid                                 | 57-66-9     | 0.0976 |
| Tegafur                                    | 17902-23-7  | 0.1001 |
| Halcinonide                                | 3093-35-4   | 0.1017 |
| Thiostrepton                               | 1393-48-2   | 0.1024 |
| Viloxazine hydrochloride                   | 35604-67-2  | 0.1034 |
| Celiprolol hydrochloride                   | 57470-78-7  | 0.1048 |
| Ondansetron Hydrochloride                  | 103639-04-9 | 0.1058 |
| Tropicamide                                | 1508-75-4   | 0.1088 |
| Levopropoxyphene napsylate                 | 5714-90-9   | 0.1109 |
| Haloproglin                                | 777-11-7    | 0.1132 |
| Lacidipine                                 | 103890-78-4 | 0.1157 |
| Nevirapine                                 | 129618-40-2 | 0.1168 |
| Betamethasone                              | 378-44-9    | 0.1174 |
| Acefylline                                 | 652-37-9    | 0.1196 |
| Sarafloxacin                               | 98105-99-8  | 0.1208 |
| Piribedil hydrochloride                    | 78213-63-5  | 0.1228 |
| Idoxuridine                                | 54-42-2     | 0.1242 |
| Pemirrolast potassium                      | 100299-08-9 | 0.1248 |
| Oxymetazoline hydrochloride                | 151615      | 0.1280 |
| Lamotrigine                                | 84057-84-1  | 0.1289 |
| Amprolium hydrochloride                    | 137-88-2    | 0.1297 |
| Sulfadoxine                                | 2447-57-6   | 0.1298 |
| Oxprenolol hydrochloride                   | 6452-73-9   | 0.1300 |
| Pipemidic acid                             | 51940-44-4  | 0.1313 |
| Entacapone                                 | 130929-57-6 | 0.1326 |
| Acitretin                                  | 55079-83-9  | 0.1336 |
| Ethaverine hydrochloride                   | 985-13-7    | 0.1353 |
| Eszopiclone                                | 138729-47-2 | 0.1370 |
| Troxipide                                  | 99777-81-8  | 0.1388 |
| Flutamide                                  | 13311-84-7  | 0.1402 |
| Fenoldopam                                 | 67227-56-9  | 0.1429 |
| Stanozolol                                 | 10418-03-8  | 0.1438 |
| Quinidine hydrochloride monohydrate        | 6151-40-2   | 0.1479 |
| Terbutaline hemisulfate                    | 23031-32-5  | 0.1481 |
| Phenprobamate                              | 673-31-4    | 0.1493 |
| Rofecoxib                                  | 162011-90-7 | 0.1493 |
| Glycopyrrolate                             | 596-51-0    | 0.1496 |
| Nifurtimox                                 | 23256-30-6  | 0.1501 |
| Mirabegron                                 | 223673-61-8 | 0.1519 |
| Pentylentetrazole                          | 54-95-5     | 0.1535 |
| Miconazole                                 | 22916-47-8  | 0.1539 |
| Clonixin Lysinate                          | 55837-30-4  | 0.1557 |

|                                                          |                       |         |
|----------------------------------------------------------|-----------------------|---------|
| PHENYLBUTYRATE SODIUM                                    | 90-27-7 (phenylbutyri | -0.5343 |
| DAPAGLIFLOZIN                                            | 461432-26-8           | -0.5332 |
| SODIUM PHENYLACETATE                                     | 114-70-5              | -0.5332 |
| MANIDIPINE HYDROCHLORIDE                                 | 89226-75-5            | -0.5325 |
| BERBERINE CHLORIDE                                       | 633-65-8, 2086-83-1   | -0.5296 |
| D-PHENYLALANINE                                          | 673-06-3              | -0.5282 |
| FASUDIL HYDROCHLORIDE                                    | 103745-39-7           | -0.5272 |
| METHOPRENE (S)                                           | 40596-69-8            | -0.5267 |
| AGMATINE SULFATE                                         | 2482-00-0             | -0.5255 |
| TETRABENAZINE                                            | 58-46-8               | -0.5255 |
| PURPURUGALLIN-4-CARBOXYLIC ACID                          | 50mg                  | -0.5238 |
| CAPSAICIN                                                | 404-86-4              | -0.5229 |
| PROPIOLACTONE                                            | 57-57-8               | -0.5208 |
| CEFTIBUTEN                                               | 97519-39-6            | -0.5207 |
| SENNOSIDE A                                              | 81-27-6               | -0.5169 |
| XANTHOPTERIN                                             | 119-44-8              | -0.5142 |
| BEPHENIUM HYDROXYNAPHTHOATE                              | 3818-50-6             | -0.5141 |
| 2',5'-DIHYDROXY-4-METHOXYCHALCONE                        | 6342-92-3             | -0.5134 |
| DIMETHYL FUMARATE                                        | 624-49-7              | -0.5120 |
| PROMAZINE HYDROCHLORIDE                                  | 53-60-1, 58-40-2 [pro | -0.5118 |
| DELAPRIL HYDROCHLORIDE                                   | 83435-67-0            | -0.5116 |
| ACETAZOLAMIDE                                            | 59-66-5               | -0.5109 |
| DIPYRONE                                                 | 5907-38-0             | -0.5105 |
| CHLORMADINONE ACETATE                                    | 302-22-7              | -0.5078 |
| DABIGATRAN ETEXILATE MESYLATE                            | 593282-20-3           | -0.5076 |
| 5-METHYLHYDANTOIN                                        | 616-03-5              | -0.5061 |
| CHRYSIN DIMETHYL ETHER                                   | 21392-57-4            | -0.5044 |
| CEPHRADINE                                               | 38821-53-3 [anhydro   | -0.5041 |
| ETHAVERINE HYDROCHLORIDE                                 | 985-13-7, 486-47-5 [b | -0.5029 |
| AGARIC ACID                                              | 666-99-9              | -0.5028 |
| CANTHARIDIN                                              | 56-25-7               | -0.5027 |
| GANGALEOIDIN                                             | 55365-63-4            | -0.5013 |
| ACETYLCARNITINE                                          | 3040-38-8             | -0.5011 |
| 2-METHYLENE-5-(2,5-DIOXOTETRAHYDROFURAN-3-YL)-6-OXO--10, |                       | -0.4998 |
| URSODIOL                                                 | 128-13-2              | -0.4994 |
| BENDIOCARB                                               | 22781-23-3            | -0.4987 |
| METHYLBENZETHONIUM CHLORIDE                              | 1320-44-1, 25155-18-  | -0.4972 |
| IBANDRONATE SODIUM                                       | 138926-19-9           | -0.4961 |
| BACCATIN III                                             | 27548-93-2            | -0.4956 |
| GLYCYL-L-LEUCYL-L-PHENYLALANINE                          |                       | -0.4939 |
| beta-LAPACHONE                                           | 4707-32-8             | -0.4925 |
| TRIMETHADIONE                                            | 127-48-0              | -0.4920 |
| CAMPHOR                                                  | 464-49-3; 76-22-2     | -0.4906 |
| GOSSYPOL                                                 | 303-45-7              | -0.4884 |
| ETHOSUXIMIDE                                             | 77-67-8               | -0.4876 |
| EUCALYPTOL                                               | 470-82-6              | -0.4872 |
| SODIUM GLUCONATE                                         | 527-07-1              | -0.4846 |
| VANCOMYCIN HYDROCHLORIDE                                 | 1404-93-9, 1404-90-6  | -0.4824 |
| AMINOPYRINE                                              | 58-15-1               | -0.4813 |
| TRIOXSALEN                                               | 3902-71-4             | -0.4806 |
| LOSARTAN                                                 | 124750-99-8, 114798-  | -0.4805 |
| MOLINDONE HYDROCHLORIDE                                  | 15622-65-8            | -0.4798 |
| GRAMINE                                                  | 87-52-5               | -0.4785 |
| ISOCONAZOLE NITRATE                                      | 24168-96-5            | -0.4783 |
| BROMOPRIDE                                               | 4093-35-0             | -0.4776 |
| VARDENAFIL HYDROCHLORIDE                                 | 224789-15-5           | -0.4742 |
| 3,4'-DIMETHOXYFLAVONE                                    |                       | -0.4738 |
| AVOCADENOFURAN                                           | 25346-24-1            | -0.4738 |
| PREDNISOLONE ACETATE                                     | 52-21-1               | -0.4728 |
| PRALIDOXIME MESYLATE                                     | 154-97-2              | -0.4698 |
| CITRULLINE                                               | 627-77-0              | -0.4669 |
| TEPRENONE                                                | 6809-52-5             | -0.4654 |
| IDEBENONE                                                | 58186-27-9            | -0.4634 |
| MIRTAZAPINE                                              | 61337-67-5            | -0.4610 |
| TAGATOSE                                                 | 87-81-0               | -0.4607 |
| LEVODOPA                                                 | 59-92-7               | -0.4595 |
| MIFEPRISTONE                                             | 84371-65-3            | -0.4582 |
| THEAFLAVIN                                               | 1011850               | -0.4572 |
| 4-HYDROXY-6-METHYLPYRAN-2-ONE                            | 675-10-5              | -0.4567 |
| TRICHLORFON                                              | 52-68-6               | -0.4547 |
| CROMOLYN SODIUM                                          | 15826-37-6            | -0.4539 |
| RESORCINOL MONOACETATE                                   | 102-29-4              | -0.4535 |
| TEICOPLANIN [A(2-1) shown]                               | 61036-62-2            | -0.4531 |
| FOSFOSAL                                                 | 6064-83-1             | -0.4530 |

|                                    |             |        |
|------------------------------------|-------------|--------|
| Alprenolol hydrochloride           | 13707-88-5  | 0.1575 |
| Vardenafil                         | 224785-90-4 | 0.1600 |
| Chloramphenicol                    | 56-75-7     | 0.1609 |
| Adamantamine fumarate              | 80789-67-9  | 0.1643 |
| Primidone                          | 125-33-7    | 0.1658 |
| Practolol                          | 6673-35-4   | 0.1703 |
| Fluorometholone                    | 426-13-1    | 0.1727 |
| Clidinium bromide                  | 3485-62-9   | 0.1746 |
| Phenacetin                         | 62-44-2     | 0.1803 |
| Aminohippuric acid                 | 61-78-9     | 0.1831 |
| Methylhydantoin-5-(D)              | 55147-68-7  | 0.1843 |
| Clonidine hydrochloride            | 4205-91-8   | 0.1891 |
| Hexamethonium dibromide dihydrate  | 55-97-0     | 0.1893 |
| Budesonide                         | 51333-22-3  | 0.1903 |
| Roxithromycin                      | 80214-83-1  | 0.1908 |
| Beclomethasone dipropionate        | 1327543     | 0.1912 |
| Azacyclonol                        | 115-46-8    | 0.1934 |
| Mepenzolate bromide                | 76-90-4     | 0.1938 |
| Cefsulodin sodium salt             | 52152-93-9  | 0.1943 |
| Lorglumide sodium salt             | 97964-56-2  | 0.1956 |
| Luteolin                           | 491-70-3    | 0.1977 |
| Etofylline                         | 519-37-9    | 0.1994 |
| Cefdinir                           | 91832-40-5  | 0.1998 |
| Idazoxan hydrochloride             | 79944-56-2  | 0.2018 |
| Apramycin                          | 37321-09-8  | 0.2043 |
| Meclofenoxate hydrochloride        | 3685-84-5   | 0.2074 |
| Zaleplon                           | 151319-34-5 | 0.2076 |
| Metoprolol-(+,-) (+)-tartrate salt | 56392-17-7  | 0.2111 |
| Aminocaproic acid                  | 60-32-2     | 0.2133 |
| Meclozine dihydrochloride          | 1104-22-9   | 0.2149 |
| Thalidomide                        | 50-35-1     | 0.2149 |
| Exemestane                         | 107868-30-4 | 0.2153 |
| Tazobactam                         | 89786-04-9  | 0.2185 |
| Famotidine                         | 76824-35-6  | 0.2188 |
| Lacosamide                         | 175481-36-4 | 0.2188 |
| Morantel tartrate                  | 26155-31-7  | 0.2192 |
| Ethosuximide                       | 77-67-8     | 0.2209 |
| Levalbuterol hydrochloride         | 50293-90-8  | 0.2235 |
| Modafinil                          | 68693-11-8  | 0.2263 |
| Rivastigmine                       | 123441-03-2 | 0.2269 |
| Suxibuzone                         | 27470-51-5  | 0.2294 |
| Benzbromarone                      | 3562-84-3   | 0.2316 |
| Famciclovir                        | 104227-87-4 | 0.2328 |
| Sulfasalazine                      | 599-79-1    | 0.2414 |
| Chicago sky blue 6B                | 259444      | 0.2477 |
| Olmesartan                         | 144689-63-4 | 0.2510 |
| Glutethimide, para-amino           | 125-84-8    | 0.2539 |
| Amiloride hydrochloride dihydrate  | 17440-83-4  | 0.2554 |
| Rasagiline                         | 136236-51-6 | 0.2562 |
| Aminonide                          | 51022-69-6  | 0.2572 |
| (S)-(-)-Atenolol                   | 93379-54-5  | 0.2617 |
| Neomycin sulfate                   | 1405-10-3   | 0.2623 |
| Nelarabine                         | 121032-29-9 | 0.2624 |
| Diatrizoic acid dihydrate          | 50978-11-5  | 0.2630 |
| Crotamiton                         | 483-63-6    | 0.2641 |
| Clobetasol propionate              | 25122-46-7  | 0.2648 |
| Dorzolamide hydrochloride          | 130693-82-2 | 0.2652 |
| Lisinopril                         | 83915-83-7  | 0.2685 |
| Carbenoxolone disodium salt        | 7421-40-1   | 0.2689 |
| Isosorbide mononitrate             | 16051-77-7  | 0.2693 |
| Bumetanide                         | 28395-03-1  | 0.2735 |
| Brimonidine L-Tartrate             | 70359-46-5  | 0.2738 |
| Famprofazone                       | 22881-35-2  | 0.2741 |
| Levonordefrin                      | 829-74-3    | 0.2765 |
| Pidotimod                          | 121808-62-6 | 0.2776 |
| Dicloxacillin sodium salt hydrate  | 13412-64-1  | 0.2784 |
| Metronidazole                      | 443-48-1    | 0.2784 |
| Olopatadine hydrochloride          | 140462-76-6 | 0.2784 |
| Carisoprodol                       | 78-44-4     | 0.2793 |
| Prednicarbate                      | 73771-04-7  | 0.2794 |
| Propantheline bromide              | 50-34-0     | 0.2811 |
| Ritonavir                          | 155213-67-5 | 0.2830 |
| Ipsapirone                         | 95847-70-4  | 0.2853 |
| Piperidolate hydrochloride         | 129-77-1    | 0.2855 |

|                                                        |                        |         |
|--------------------------------------------------------|------------------------|---------|
| CYPROTERONE ACETATE                                    | 427-51-0               | -0.4526 |
| DIBUTYL PHTHALATE                                      | 84-74-2                | -0.4506 |
| SULFAPHENAZOLE                                         | 526-08-9               | -0.4502 |
| SINAPIC ACID                                           | 530-59-6               | -0.4489 |
| PARACHLOROPHENOL                                       | 106-48-9               | -0.4488 |
| 12a-HYDROXY-9-DEMETHYLMUNDUSERONE-8-CARBOXYLIC ACID    |                        | -0.4482 |
| PHENTOLAMINE HYDROCHLORIDE                             | 73-05-2, 50-60-2 [phe  | -0.4473 |
| SULFAMOXYLE                                            | 729-99-7               | -0.4462 |
| HYDROLYSIS PRODUCT OF BUSSEIN                          |                        | -0.4456 |
| AMEZINIUM METILSULFATE                                 | 30578-37-1             | -0.4452 |
| HARMINE                                                | 442-51-3               | -0.4446 |
| TRIMEBUTINE MALEATE                                    | 34140-59-5(base)       | -0.4436 |
| beta-SITOSTEROL                                        | 83-46-5                | -0.4413 |
| BENZANTHRONE                                           | 82-05-3                | -0.4395 |
| GARCINOLIC ACID                                        | 91893-83-3             | -0.4391 |
| GUAIAZULENE                                            | 489-84-9               | -0.4391 |
| CASANTHRANOL [cascarioside A shown]                    | 8024-48-4              | -0.4388 |
| GEFITINIB                                              | 184475-35-2            | -0.4355 |
| QUINOXYFEN                                             | 124495-18-7            | -0.4346 |
| EPINEPHRINE BITARTRATE                                 | 51-42-3                | -0.4335 |
| ARECOLINE HYDROBROMIDE                                 | 300-08-3, 63-75-2 [are | -0.4326 |
| AZOBENZENE                                             | 103-33-3               | -0.4306 |
| METHYL CAFFEATE                                        | 3843-74-1              | -0.4296 |
| CINTRIAMIDE                                            | 5588-21-6              | -0.4287 |
| L-PHENYLALANINOL                                       | 3182-95-4              | -0.4285 |
| FLUMETHAZONE PIVALATE                                  | 2002-29-1, 2135-17-3   | -0.4276 |
| CARISOPRODOL                                           | 78-44-4                | -0.4257 |
| OXOLINIC ACID                                          | 14698-29-4 (acid)      | -0.4255 |
| PENTETIC ACID                                          | 67-43-6                | -0.4240 |
| GALLAMINE TRIETHIODIDE                                 | 65-29-2, 153-76-4 [ga  | -0.4223 |
| PELLETIERINE HYDROCHLORIDE                             | 5984-61-2              | -0.4218 |
| AVOCADENE                                              | 24607-08-7             | -0.4217 |
| FAMPROFAZONE                                           | 22881-35-2             | -0.4212 |
| AFALANINE                                              | 2901-75-9              | -0.4193 |
| SULFAPYRIDINE                                          | 144-83-2               | -0.4191 |
| ACEFYLLINE                                             | 652-37-9               | -0.4163 |
| ENTACAPONE                                             | 116314-67-1            | -0.4158 |
| PROPARGITE                                             | 2312-35-8              | -0.4145 |
| VISNAGIN                                               | 82-57-5                | -0.4143 |
| METHOXYVONE                                            | 82517-12-2             | -0.4138 |
| FINASTERIDE                                            | 98319-26-7             | -0.4122 |
| GRISEOFULVIC ACID                                      | 469-54-5               | -0.4122 |
| PHENYLETHYL ALCOHOL                                    | 60-12-8                | -0.4118 |
| ARIPIRAZOLE                                            | 129722-12-9            | -0.4111 |
| AMPICILLIN SODIUM                                      | 69-52-3, 69-53-4 [amp  | -0.4106 |
| D-ARABITOL                                             | 488-82-4               | -0.4106 |
| FORMONONETIN                                           | 485-72-3               | -0.4092 |
| 12-HYDROXY-4,4-BISNOR-4,8,11,13-PODOCARPATETRAEN-3-ONE |                        | -0.4088 |
| BUSULFAN                                               | 55-98-1                | -0.4068 |
| 4,6-DIMETHOXYTOLUQUINONE                               |                        | -0.4065 |
| URSOLOLACTONE ACETATE                                  | 28290-51-9             | -0.4061 |
| CHLOROXAZONE                                           | 95-25-0                | -0.4050 |
| METHOXYAMINE HYDROCHLORIDE                             | 593-56-6               | -0.4035 |
| INDOLE-3-CARBINOL                                      | 700-06-1               | -0.4012 |
| CHRYSANTHEMIC ACID, ETHYL ESTER                        | 97-41-6                | -0.4007 |
| PREGABALIN                                             | 148553-50-8            | -0.4005 |
| PICOLAMINE                                             | 3731-52-0              | -0.3976 |
| PYRITINOL                                              | 1098-97-1              | -0.3970 |
| TRETINOIN                                              | 302-79-4               | -0.3966 |
| 4-METHOXYDALBERGIONE                                   | 4646-86-0              | -0.3963 |
| CARBAMAZEPINE                                          | 298-46-4               | -0.3953 |
| AMPHOTERICIN B                                         | 1397-89-3              | -0.3935 |
| FLECAINIDE ACETATE                                     | 54143-56-5             | -0.3930 |
| ORSELLINIC ACID                                        | 480-64-8               | -0.3928 |
| TIMOLOL MALEATE                                        | 26921-17-5, 91524-16   | -0.3928 |
| CEFCAPENE PIVOXIL HYDROCHLORIDE                        | 147816-23-7            | -0.3926 |
| BAICALIN                                               | 21967-41-9             | -0.3924 |
| MEDRYSONE                                              | 2668-66-8              | -0.3920 |
| SODIUM FLUOROACETATE                                   | 62-74-8                | -0.3876 |
| N-METHYLANTHRANILIC ACID                               | 119-68-6               | -0.3873 |
| CEFAZOLIN SODIUM                                       | 27164-46-1, 25953-19   | -0.3855 |
| ETOSALAMIDE                                            | 15302-15-5             | -0.3844 |
| INAMRINONE                                             | 60719-84-8             | -0.3835 |
| PROBUCOL                                               | 23288-49-5             | -0.3832 |

|                                         |               |        |
|-----------------------------------------|---------------|--------|
| Nifedipine                              | 21829-25-4    | 0.2924 |
| Ziprasidone Hydrochloride               | 138982-67-9   | 0.2940 |
| Disopyramide                            | 671200        | 0.2951 |
| Nalbuphine hydrochloride                | 23277-43-2    | 0.2951 |
| Isotretinoin                            | 4759-48-2     | 0.2960 |
| Pentolinium bitartrate                  | 52-62-0       | 0.2973 |
| Lansoprazole                            | 103577-45-3   | 0.2992 |
| Canrenoic acid potassium salt           | 102731        | 0.3031 |
| 3-alpha-Hydroxy-5-beta-androstan-17-one | 53-42-9       | 0.3038 |
| Hesperidin                              | 520-26-3      | 0.3051 |
| Etilefrine hydrochloride                | 534-87-2      | 0.3052 |
| Hydroflumethiazide                      | 135-09-1      | 0.3052 |
| Flurbiprofen                            | 5104-49-4     | 0.3061 |
| Alfaxalone                              | 23930-19-0    | 0.3089 |
| Cefoperazone dihydrate                  | not available | 0.3102 |
| Sulbactam                               | 68373-14-8    | 0.3102 |
| Argatroban                              | 74863-84-6    | 0.3146 |
| Zaprinast                               | 37762-06-4    | 0.3155 |
| Sulfamethizole                          | 144-82-1      | 0.3160 |
| Pantoprazole sodium                     | 138786-67-1   | 0.3220 |
| Pregabalin                              | 148553-50-8   | 0.3224 |
| Midodrine hydrochloride                 | 3092-17-9     | 0.3238 |
| Betahistine mesylate                    | 54856-23-4    | 0.3243 |
| Loracarbef                              | 121961-22-6   | 0.3281 |
| Histamine dihydrochloride               | 56-92-8       | 0.3305 |
| Corticosterone                          | 50-22-6       | 0.3357 |
| Sulfamonomethoxine                      | 1220-83-3     | 0.3371 |
| Tetramisole hydrochloride               | 5086-74-8     | 0.3381 |
| Chlorzoxazone                           | 95-25-0       | 0.3383 |
| Dequalinium dichloride                  | 522-51-0      | 0.3399 |
| Fentiazac                               | 18046-21-4    | 0.3399 |
| Tetracycline hydrochloride              | 64-75-5       | 0.3411 |
| Ceftazidime pentahydrate                | 78439-06-2    | 0.3427 |
| Benzonatate                             | 104-31-4      | 0.3429 |
| Mercaptopurine                          | 50-44-2       | 0.3487 |
| Spectinomycin dihydrochloride           | 21736-83-4    | 0.3533 |
| Tracazolate hydrochloride               | 41094-88-6    | 0.3564 |
| Levetiracetam                           | 102767-28-2   | 0.3574 |
| Cisatracurium besylate                  | 64228-79-1    | 0.3577 |
| Picotamide monohydrate                  | 80530-63-8    | 0.3604 |
| (R)-(+)-Atenolol                        | 56715-13-0    | 0.3620 |
| Picrotoxinin                            | 17617-45-7    | 0.3642 |
| Cephalosporanic acid, 7-amino           | 957-68-6      | 0.3743 |
| Acetylsalicylic acid                    | 50-78-2       | 0.3768 |
| Ritodrine hydrochloride                 | 23239-51-2    | 0.3788 |
| Misoprostol                             | 59122-46-2    | 0.3790 |
| Chlorotrianisene                        | 569-57-3      | 0.3815 |
| Ubenimex                                | 58970-76-6    | 0.3839 |
| Imidurea                                | 39236-46-9    | 0.3873 |
| Sparfloxacin                            | 110871-86-8   | 0.3880 |
| (+) -Levobunolol hydrochloride          | 47141-41-3    | 0.3881 |
| Mefexamide hydrochloride                | 3413-64-7     | 0.3888 |
| Glafenine hydrochloride                 | 65513-72-6    | 0.3966 |
| Melengestrol acetate                    | 2919-66-6     | 0.3966 |
| Carbamazepine                           | 298-46-4      | 0.3981 |
| Benzocaine                              | 94-09-7       | 0.3995 |
| Latanoprost                             | 145773-22-4   | 0.4028 |
| Tizanidine hydrochloride                | 51322-75-9    | 0.4033 |
| Demecarium bromide                      | 56-94-0       | 0.4040 |
| Tranilast                               | 53902-12-8    | 0.4045 |
| Rizatriptan benzoate                    | 145202-66-0   | 0.4066 |
| N-Acetyl-L-leucine                      | 1188-21-2     | 0.4103 |
| Caffeine                                | 58-08-2       | 0.4137 |
| Iobenguane sulfate                      | 103346-16-3   | 0.4149 |
| Triflusal                               | 322-79-2      | 0.4211 |
| Cefixime                                | 79350-37-1    | 0.4242 |
| Phentermine hydrochloride               | 1197-21-3     | 0.4251 |
| Oxacillin sodium                        | 1173-88-2     | 0.4255 |
| Oxantel pamoate                         | 68813-55-8    | 0.4264 |
| Amoxicillin                             | 26787-78-0    | 0.4298 |
| Ethynodiol diacetate                    | 297-76-7      | 0.4305 |
| Ethambutol dihydrochloride              | 1070-11-7     | 0.4324 |
| Streptozotocin                          | 18883-66-4    | 0.4333 |
| Cyclopentolate hydrochloride            | 5870-29-1     | 0.4364 |

|                                                    |                       |         |
|----------------------------------------------------|-----------------------|---------|
| QUINETHAZONE                                       | 73-49-2               | -0.3824 |
| MEVALONIC ACID LACTONE                             | 503-48-0              | -0.3813 |
| ACETOHEXAMIDE                                      | 968-81-0              | -0.3802 |
| GABOXADOL HYDROCHLORIDE                            | 64603-91-4            | -0.3801 |
| ASCORBYL PALMITATE                                 | 137-66-6              | -0.3796 |
| ATRACURIUM BESYLATE                                | 64228-81-5            | -0.3773 |
| CIPROFIBRATE                                       | 52214-84-3            | -0.3772 |
| ANDROSTERONE                                       | 53-41-8               | -0.3771 |
| ENROFLOXACIN                                       | 93106-60-6            | -0.3770 |
| LOXOPROFEN                                         | 68767-14-6            | -0.3767 |
| ESCITALOPRAM OXALATE                               | 219861-08-2           | -0.3765 |
| GATIFLOXACIN                                       | 160738-57-8           | -0.3733 |
| METAXALONE                                         | 1665-48-1             | -0.3733 |
| TILETAMINE HYDROCHLORIDE                           | 14176-50-2            | -0.3733 |
| BUCLADESINE SODIUM                                 | 16980-89-5, 362-74-3  | -0.3703 |
| MONTELUKAST SODIUM                                 | 151767-02-1           | -0.3667 |
| 4-(3-BUTOXY-4-METHOXYBENZYL)IMIDAZOL               | 29925-17-5            | -0.3662 |
| VALPROATE SODIUM                                   | 1069-66-5             | -0.3662 |
| CLOFAZIMINE                                        | 2030-63-9             | -0.3646 |
| TROXIPIDE                                          | 30751-05-4, 99777-81  | -0.3638 |
| 3H-1,2-DITHIOLE-3-THIONE                           | 534-25-8              | -0.3637 |
| AGOMELATINE                                        | 138112-76-2           | -0.3629 |
| GOSSYPETIN                                         | 489-35-0              | -0.3629 |
| 3alpha-HYDROXY-3-DEOXYANGOLENSIC ACID METHYL ESTER |                       | -0.3610 |
| MEGESTROL ACETATE                                  | 595-33-5, 3562-63-8   | -0.3610 |
| S-CARBAMOYL-L-CYSTEINE                             | 2072-71-1             | -0.3605 |
| ANAZOLENE SODIUM                                   | 3861-73-2             | -0.3601 |
| ARMODAFINIL                                        | 112111-43-0           | -0.3566 |
| MEPHENTERMINE SULFATE                              | 1212-72-2             | -0.3566 |
| CHLORANIL                                          | 118-75-2              | -0.3550 |
| BENFOTIAMINE                                       | 22457-89-2            | -0.3543 |
| USNIC ACID                                         | 125-46-2              | -0.3533 |
| CITIOLONE                                          | 1195-16-0             | -0.3521 |
| GENETICIN                                          | 49863-47-0, 108321-4  | -0.3516 |
| SUBERIC ACID                                       | 505-48-6              | -0.3507 |
| BUTAMBEN                                           | 94-25-7               | -0.3504 |
| FLUMEQUINE                                         | 42835-25-6            | -0.3502 |
| SULFADIMETHOXINE                                   | 122-11-2              | -0.3498 |
| CARMOFUR                                           | 61422-45-5            | -0.3482 |
| LEODIN DIMETHYL ETHER                              |                       | -0.3477 |
| RANITIDINE HYDROCHLORIDE                           | 66357-59-3; 66357-35  | -0.3456 |
| 8beta-HYDROXYCARAPIN, 3,8-HEMIACETAL               |                       | -0.3453 |
| PIMOBENDAN                                         | 74150-27-9            | -0.3445 |
| BISSALICYL FUMARATE                                |                       | -0.3411 |
| FESOTERODINE FUMARATE                              | 286930-03-8           | -0.3405 |
| PRONETALOL HYDROCHLORIDE                           | 54-80-8               | -0.3405 |
| DEMETHYLNIBILETIN                                  | 2174-59-6             | -0.3389 |
| CLOSTAZOL                                          | 73963-72-1            | -0.3386 |
| DEFLAZACORT                                        | 14484-47-0            | -0.3369 |
| THONZYLAMINE HYDROCHLORIDE                         | 63-56-9, 91-85-0 (tho | -0.3369 |
| beta-CARYOPHYLLENE ALCOHOL                         | 472-97-9              | -0.3364 |
| IRIDIN                                             | 491-74-7              | -0.3351 |
| DIETHYLCARBAMAZINE CITRATE                         | 1642-54-2             | -0.3340 |
| ROCCELIC ACID                                      | 22139-54-4            | -0.3315 |
| ACEXAMIC ACID                                      | 57-08-9               | -0.3296 |
| DIACETAMATE                                        | 2623-33-8             | -0.3296 |
| SINAPIC ACID METHYL ETHER                          | 90-50-6               | -0.3295 |
| DOXAZOSIN MESYLATE                                 | 77883-43-3            | -0.3292 |
| SPERMINE                                           | 71-44-3               | -0.3286 |
| TACRINE HYDROCHLORIDE                              | 1684-40-8             | -0.3240 |
| TRIMEDLURE                                         | 12002-53-8            | -0.3218 |
| DEOXSAPPANONE B TRIMETHYL ETHER                    |                       | -0.3185 |
| ANABASAMINE HYDROCHLORIDE                          | 20410-87-1(base)      | -0.3185 |
| CHICAGO SKY BLUE                                   | 259444                | -0.3176 |
| CYPROTERONE                                        | 2098-66-0             | -0.3167 |
| BETAMIPRON                                         | 3440-28-6             | -0.3160 |
| TOSUFLOXACIN TOLUENESULFONATE HYDRA                | 115964-29-9           | -0.3147 |
| BENDAZAC                                           | 20187-55-7            | -0.3140 |
| HYDROQUINIDINE                                     | 1435-55-8             | -0.3112 |
| ETHYLENEDIAMINE TETRACETIC ACID                    | 60-00-4               | -0.3111 |
| PUTRESCINE DIHYDROCHLORIDE                         | 333-93-7              | -0.3107 |
| GRAYANOTOXIN I                                     | 1030234               | -0.3099 |
| METHIONINE (L)                                     | 63-68-3               | -0.3077 |
| 16(17)-EPOXY-21-ACETOXY-5-PREGNENOLONE             |                       | -0.3076 |

|                                         |              |        |
|-----------------------------------------|--------------|--------|
| Zalcitabine                             | 7481-89-2    | 0.4383 |
| Meticrane                               | 1084-65-7    | 0.4401 |
| Cyproterone acetate                     | 427-51-0     | 0.4422 |
| Tylosin                                 | 1401-69-0    | 0.4495 |
| Debrisoquin sulfate                     | 581-88-4     | 0.4522 |
| Isoxicam                                | 34552-84-6   | 0.4522 |
| Amifostine                              | 20537-88-6   | 0.4531 |
| Tyloxapol                               | 25301-02-4   | 0.4539 |
| Khellin                                 | 82-02-0      | 0.4582 |
| Aztreonam                               | 78110-38-0   | 0.4614 |
| Anastrozole                             | 120511-73-1  | 0.4635 |
| Nitrofurantoin                          | 67-20-9      | 0.4644 |
| Nadifloxacin                            | 124858-35-1  | 0.4672 |
| Rimexolone                              | 49697-38-3   | 0.4689 |
| Meloxicam                               | 71125-38-7   | 0.4696 |
| Miglitol                                | 72432-03-2   | 0.4716 |
| Diclazuril                              | 101831-37-2  | 0.4720 |
| Pioglitazone                            | 111025-46-8  | 0.4720 |
| Sulindac                                | 38194-50-2   | 0.4739 |
| Raclopride                              | 84225-95-6   | 0.4756 |
| Diprophylline                           | 479-18-5     | 0.4768 |
| Gentamicine sulfate                     | 1405-41-0    | 0.4772 |
| Nisdolipine                             | 63675-72-9   | 0.4806 |
| Methenamine                             | 100-97-0     | 0.4857 |
| Lodoxamide                              | 53882-12-5   | 0.4872 |
| Tiapride hydrochloride                  | 51012-33-0   | 0.4877 |
| Sulfamethazine sodium salt              | 1981-58-4    | 0.4894 |
| Metyrapone                              | 54-36-4      | 0.4897 |
| Estrone                                 | 53-16-7      | 0.4920 |
| Fenoterol hydrobromide                  | 16409        | 0.4944 |
| Flunixin meglumine                      | 42461-84-7   | 0.4956 |
| Acetylcysteine                          | 616-91-1     | 0.4975 |
| Phenformin hydrochloride                | 834-28-6     | 0.4978 |
| Carbidopa                               | 28860-95-9   | 0.5026 |
| Proparacaine hydrochloride              | 1452000      | 0.5026 |
| Iopamidol                               | 60166-93-0   | 0.5041 |
| Propoxycaine hydrochloride              | 550-83-4     | 0.5043 |
| Letrozole                               | 112809-51-5  | 0.5044 |
| Enrofloxacin                            | 93106-60-6   | 0.5103 |
| (+)-Isoproterenol (+)-bitartrate salt   | 14638-70-1   | 0.5121 |
| Benidipine hydrochloride                | 91599-74-5   | 0.5153 |
| Pempidine                               | 79-55-0      | 0.5153 |
| Pranlukast                              | 103177-37-3  | 0.5191 |
| Ganciclovir                             | 82410-32-0   | 0.5225 |
| Diazoxide                               | 364-98-7     | 0.5246 |
| Atracurium besylate                     | 64228-81-5   | 0.5274 |
| Disulfiram                              | 97-77-8      | 0.5277 |
| Indomethacin                            | 53-86-1      | 0.5287 |
| Fenofibrate                             | 49562-28-9   | 0.5291 |
| Pentamidine isethionate                 | 140-64-7     | 0.5303 |
| Phenothiazine                           | 92-84-2      | 0.5320 |
| Furosemide                              | 54-31-9      | 0.5329 |
| Brinzolamide                            | 138890-62-7  | 0.5335 |
| Flumethasone pivalate                   | 2002-29-1    | 0.5358 |
| Nandrolone                              | 434-22-0     | 0.5374 |
| Flufenamic acid                         | 530-78-9     | 0.5401 |
| Canrenone                               | 976-71-6     | 0.5403 |
| Azapropazone                            | 13539-59-8   | 0.5414 |
| Carbachol                               | 51-83-2      | 0.5418 |
| Fluocinolone acetonide                  | 67-73-2      | 0.5422 |
| Chlorphensin carbamate                  | 886-74-8     | 0.5437 |
| Ciprofloxacin hydrochloride monohydrate | 93107-08-5   | 0.5443 |
| Vigabatrin hydrochloride                | 1391054-02-6 | 0.5470 |
| Moxisylyte hydrochloride                | 964-52-3     | 0.5485 |
| Mesna                                   | 19767-45-4   | 0.5511 |
| Thyroxine (L)                           | 51-48-9      | 0.5511 |
| Fenoprofen calcium salt dihydrate       | 53746-45-5   | 0.5549 |
| Guanethidine sulfate                    | 60-02-6      | 0.5584 |
| (S)-(-)-Cycloserine                     | 339-72-0     | 0.5620 |
| Hyoscyamine (L)                         | 101-31-5     | 0.5623 |
| Cortisol acetate                        | 50-03-3      | 0.5662 |
| Testosterone propionate                 | 57-85-2      | 0.5693 |
| Rifapentine                             | 61379-65-5   | 0.5695 |
| Ethoxyquin                              | 91-53-2      | 0.5696 |

|                                     |                       |         |
|-------------------------------------|-----------------------|---------|
| ETHION                              | 563-12-2              | -0.3076 |
| CROTAMITON                          | 483-63-6              | -0.3074 |
| CHROMOCARB                          | 4940-39-0             | -0.3065 |
| HEPTAMINOL HYDROCHLORIDE            | 543-15-7, 372-66-7 [h | -0.3058 |
| alpha-TOCHOPHERYL ACETATE           | 58-95-7               | -0.3053 |
| METHOXSALEN                         | 298-81-7              | -0.3046 |
| BUTACAINE SULFATE                   | 149-15-5; 149-16-6 (b | -0.3041 |
| BERGAPTEN                           | 484-20-8              | -0.3032 |
| LEVETIRACETAM                       | 102767-28-2           | -0.3029 |
| DIBUCAINE                           | 85-79-0, 61-12-1 [hyc | -0.3026 |
| NICARDIPINE HYDROCHLORIDE           | 54527-84-3, 55985-32  | -0.3022 |
| METHYLATROPINE NITRATE              | 52-88-0               | -0.3016 |
| DEXAMETHASONE                       | 50-02-2               | -0.3006 |
| EDOXABAN TOSYLATE HYDRATE           | 480449-71-6           | -0.3006 |
| FLUVOXAMINE MALEATE                 | 61718-82-9            | -0.2993 |
| BIOCHANIN A DIACETATE               | 54443-59-3            | -0.2989 |
| FOMEPIZOLE                          | 7554-65-6             | -0.2981 |
| FLUCONAZOLE                         | 86386-73-4            | -0.2947 |
| OXIRACETAM                          | 62613-82-5            | -0.2946 |
| BORNYL ACETATE                      | 76-49-3               | -0.2937 |
| DICLAZURIL                          | 101831-37-2           | -0.2937 |
| MONENSIN SODIUM                     | 22373-78-0            | -0.2937 |
| VERAPAMIL HYDROCHLORIDE             | 152-11-4, 52-53-9 [ve | -0.2923 |
| 5alpha-ANDROSTAN-3,17-DIONE         | 846-46-8              | -0.2921 |
| SISOMICIN SULFATE                   | 32385-11-8            | -0.2915 |
| MADECASSIC ACID                     | 18449-41-7            | -0.2881 |
| CAMPTOTHECIN                        | 2114454               | -0.2868 |
| CHRYSANTHEMIC ACID                  | 10453-89-1            | -0.2866 |
| MELOXICAM                           | 71125-38-7            | -0.2857 |
| EPOXYGEDUNIN                        |                       | -0.2856 |
| CYACETACIDE                         | 140-87-4              | -0.2827 |
| 2-METHOXY-4,5-METHYLENEDIOXYBENZALD | 5780-00-7             | -0.2817 |
| TROXERUTIN                          | 7085-55-4             | -0.2810 |
| ROLIPRAM                            | 61413-54-5            | -0.2796 |
| ISOPEONOL                           | 493-33-4              | -0.2783 |
| HALOPERIDOL                         | 52-86-8               | -0.2780 |
| DIIODOTYROSINE DIHYDRATE            | 18835-59-1            | -0.2770 |
| TIOXOLONE                           | 4991-65-5             | -0.2768 |
| LINEZOLID                           | 165800-03-3           | -0.2757 |
| RIBOFLAVIN                          | 83-88-5               | -0.2740 |
| 4-TRIFLUOROMETHYLPHENYLACETIC ACID  | 32857-62-8            | -0.2737 |
| 5,2'-DIMETHOXYFLAVONE               |                       | -0.2726 |
| BRAZILIN                            | 474-07-7              | -0.2697 |
| POTASSIUM p-AMINOBENZOATE           | 150-13-0 (acid)       | -0.2691 |
| NITHIAMIDE                          | 140-40-9              | -0.2670 |
| IODOFORM                            | 75-47-8               | -0.2668 |
| L-GLUTAMIC ACID                     | 56-86-0               | -0.2660 |
| RANOLAZINE DIHYDROCHLORIDE          | 95635-55-5            | -0.2659 |
| ALTRENOGEST                         | 850-52-2              | -0.2642 |
| CACODYLIC ACID                      | 75-60-5               | -0.2639 |
| GALANGIN 3-O-METHYL ETHER           | 6665-74-3             | -0.2639 |
| CEAROIN 3-METHYL ETHER              |                       | -0.2637 |
| 3,5-DIHYDROXYFLAVONE                | 6665-69-6             | -0.2631 |
| EPICATECHIN MONOGALLATE             | 1257-08-5             | -0.2613 |
| GUANETHIDINE MONOSULFATE            | 55-65-2               | -0.2611 |
| ISOOSAJIN                           | 5745-54-0             | -0.2600 |
| RETUSIN                             | 1245-15-4             | -0.2596 |
| PHYSOSTIGMINE SULFATE               | 64-47-1               | -0.2592 |
| LACTOSE MONOHYDRATE                 | 62-42-3               | -0.2583 |
| QUASSIN                             | 76-78-8               | -0.2583 |
| OLMESARTAN                          | 144689-24-7           | -0.2570 |
| BETAHISTINE DIHYDROCHLORIDE         | 5579-84-0, 5638-76-6  | -0.2562 |
| GLIPIZIDE                           | 29094-61-9            | -0.2558 |
| ACETYLGUTAMIC ACID                  | 1430871               | -0.2553 |
| INOSITOL                            | 87-89-8               | -0.2532 |
| MYCLOBUTANIL                        | 88671-89-0            | -0.2532 |
| PROLINE (L)                         | 147-85-3              | -0.2532 |
| NEOHESPERIDIN DIHYDROCHALCONE       | 20702-77-6            | -0.2511 |
| CLORSULON                           | 60200-06-8            | -0.2494 |
| DANTROLENE SODIUM                   | 24868-20-0, 14663-23  | -0.2477 |
| NORDEFRIIN HYDROCHLORIDE            | 138-61-4, 6539-57-7 [ | -0.2466 |
| DILTIAZEM HYDROCHLORIDE             | 33286-22-5, 42399-41  | -0.2463 |
| CEFADROXIL                          | 66592-87-8, 50370-12  | -0.2463 |
| THALIDOMIDE                         | 50-35-1               | -0.2463 |

|                                           |             |        |
|-------------------------------------------|-------------|--------|
| (+,-)-Octopamine hydrochloride            | 770-05-8    | 0.5697 |
| Ofloxacin                                 | 82419-36-1  | 0.5703 |
| Ronidazole                                | 7681-76-7   | 0.5709 |
| Viomycin sulfate                          | 37883-00-4  | 0.5718 |
| Altretamine                               | 645-05-6    | 0.5745 |
| Fusidic acid sodium salt                  | 751-94-0    | 0.5748 |
| Busulfan                                  | 55-98-1     | 0.5749 |
| Clopamide                                 | 636-54-4    | 0.5752 |
| (+,-)-Synephrine                          | 94-07-5     | 0.5781 |
| Mupirocin                                 | 12650-69-0  | 0.5813 |
| Tobramycin                                | 32986-56-4  | 0.5871 |
| Propidium iodide                          | 25535-16-4  | 0.5878 |
| Sulfaguanidine                            | 57-67-0     | 0.5880 |
| Clarithromycin                            | 81103-11-9  | 0.5898 |
| Nitrofurazone                             | 59-87-0     | 0.5916 |
| Meclofenamic acid sodium salt monohydrate | 6385-02-0   | 0.5918 |
| Trimetazidine dihydrochloride             | 13171-25-0  | 0.5926 |
| 2-Aminobenzenesulfonamide                 | 3306-62-5   | 0.5944 |
| Neostigmine bromide                       | 114-80-7    | 0.5947 |
| Benzthiazide                              | 91-33-8     | 0.5963 |
| Troglitazone                              | 97322-87-7  | 0.6016 |
| Glibenclamide                             | 10238-21-8  | 0.6020 |
| Gemfibrozil                               | 25812-30-0  | 0.6024 |
| Diclofenac sodium                         | 15307-79-6  | 0.6038 |
| Tribenoside                               | 10310-32-4  | 0.6050 |
| Mesalamine                                | 89-57-6     | 0.6094 |
| Algestone acetophenide                    | 24356-94-3  | 0.6111 |
| Temozolomide                              | 85622-93-1  | 0.6125 |
| Telenzepine dihydrochloride               | 147416-96-4 | 0.6167 |
| Baclofen (R,S)                            | 1134-47-0   | 0.6179 |
| Nystatine                                 | 1400-61-9   | 0.6194 |
| Chenodiol                                 | 474-25-9    | 0.6213 |
| Butacaine                                 | 149-16-6    | 0.6220 |
| Moxonidine                                | 75438-57-2  | 0.6224 |
| Nifenazone                                | 2139-47-1   | 0.6248 |
| Clindamycin hydrochloride                 | 21462-39-5  | 0.6308 |
| Norethynodrel                             | 68-23-5     | 0.6315 |
| Anagrelide                                | 68475-42-3  | 0.6316 |
| Iopanoic acid                             | 96-83-3     | 0.6325 |
| Cephalothin sodium salt                   | 58-71-9     | 0.6354 |
| Trimetozine                               | 635-41-6    | 0.6378 |
| Fosinopril                                | 98048-97-6  | 0.6385 |
| Acemetacin                                | 53164-05-9  | 0.6408 |
| Chlorothiazide                            | 58-94-6     | 0.6441 |
| Fenbufen                                  | 36330-85-5  | 0.6478 |
| Enalapril maleate                         | 76095-16-4  | 0.6497 |
| Topiramate                                | 97240-79-4  | 0.6499 |
| Sulfacetamide sodic hydrate               | 6209-17-2   | 0.6507 |
| Meropenem                                 | 96036-03-2  | 0.6559 |
| Phenylpropanolamine hydrochloride         | 154-41-6    | 0.6572 |
| Levocabastine hydrochloride               | 79547-78-7  | 0.6586 |
| Levamisole hydrochloride                  | 16595-80-5  | 0.6588 |
| Florfenicol                               | 73231-34-2  | 0.6589 |
| Vincamine                                 | 1617-90-9   | 0.6600 |
| Ramipril                                  | 87333-19-5  | 0.6603 |
| Sibutramine hydrochloride                 | 125494-59-9 | 0.6631 |
| Felbamate                                 | 25451-15-4  | 0.6692 |
| Prilocaine hydrochloride                  | 1786-81-8   | 0.6740 |
| Lamivudine                                | 134678-17-4 | 0.6815 |
| Nialamide                                 | 51-12-7     | 0.6818 |
| Epirizole                                 | 18694-40-1  | 0.6847 |
| Linezolid                                 | 165800-03-3 | 0.6874 |
| Naphazoline hydrochloride                 | 550-99-2    | 0.6886 |
| Mephesisin                                | 59-47-2     | 0.6892 |
| Benfotiamine                              | 22457-89-2  | 0.6896 |
| Tolfenamic acid                           | 13710-19-5  | 0.6914 |
| Clavulanate potassium salt                | 58001-44-8  | 0.6928 |
| Ornidazole                                | 16773-42-5  | 0.6973 |
| Mafenide hydrochloride                    | 138-37-4    | 0.6992 |
| Etoricoxib                                | 202409-33-4 | 0.7009 |
| Folic acid                                | 59-30-3     | 0.7035 |
| Flumethasone                              | 2135-17-3   | 0.7037 |
| Cetirizine dihydrochloride                | 83881-52-1  | 0.7048 |
| Artemisinin                               | 63968-64-9  | 0.7057 |

|                                              |                       |         |
|----------------------------------------------|-----------------------|---------|
| ETOMIDATE                                    | 33125-97-2            | -0.2461 |
| BEKANAMYCIN SULFATE                          | 4696-76-8 (base)      | -0.2434 |
| CHLOROXYLENOL                                | 88-04-0               | -0.2433 |
| TOLAZAMIDE                                   | 1156-19-0             | -0.2426 |
| TRIBROMOETHANOL                              | 75-80-9               | -0.2424 |
| PROCODAZOLE                                  | 23249-97-0            | -0.2414 |
| WARFARIN                                     | 81-81-2               | -0.2409 |
| SKATOLE                                      | 83-34-1               | -0.2389 |
| DOXIFLURIDINE                                | 436349                | -0.2386 |
| 3-DESMETHYL-5-DESHYDROXYSCLEROIN             |                       | -0.2381 |
| BISACODYL                                    | 603-50-9              | -0.2355 |
| GUANABENZ ACETATE                            | 23256-50-0            | -0.2326 |
| TREHALOSE DIHYDRATE                          | 6138-23-4             | -0.2326 |
| PYRETHRINS                                   | 121-21-1              | -0.2324 |
| DOCUSATE SODIUM                              | 577-11-7              | -0.2314 |
| 8-HYDROXYCARAPINIC ACID                      |                       | -0.2296 |
| HESPERETIN                                   | 520-33-2              | -0.2287 |
| 7-DESHYDROXYPYROGALLIN-4-CARBOXYLIC ACID     |                       | -0.2285 |
| METHAPYRILENE HYDROCHLORIDE                  | 135-23-9, 91-80-5 (me | -0.2283 |
| 4-ANISALDEHYDE                               | 123-11-5              | -0.2277 |
| PHYSOSTIGMINE                                | 57-47-6               | -0.2273 |
| LITHOCHOLIC ACID                             | 434-13-9              | -0.2268 |
| BENZYL ALCOHOL                               | 100-51-6              | -0.2257 |
| MINOXIDIL                                    | 38304-91-5 (base)     | -0.2254 |
| 2-THIOURACIL                                 | 141-90-2              | -0.2245 |
| SULFANILIC ACID                              | 121-57-3              | -0.2242 |
| ACTARIT                                      | 18699-02-2            | -0.2237 |
| CHLOROXINE                                   | 773-76-2              | -0.2229 |
| PANGAMIC ACID SODIUM                         | 20858-86-0            | -0.2228 |
| NIPECOTIC ACID                               | 498-95-3              | -0.2206 |
| alpha-CYANO-3-HYDROXYCINNAMIC ACID           | 54673-07-3            | -0.2205 |
| alpha-METHYL-L-TYROSINE                      | 672-87-7              | -0.2205 |
| PANTOTHENIC ACID(d) Na salt                  | 63409-48-3            | -0.2204 |
| 1,2-DIMETHYLHYDRAZINE HYDROCHLORIDE          | 306-37-6              | -0.2188 |
| SHIKIMIC ACID                                | 138-59-0              | -0.2188 |
| UBIDECARENONE                                | 303-98-0              | -0.2188 |
| CITRIC ACID                                  | 77-92-9               | -0.2170 |
| METHAZOLAMIDE                                | 554-57-4              | -0.2170 |
| N-METHYLBENZYLAMINE HYDROCHLORIDE            | 13426-94-3, 103-67-3  | -0.2169 |
| XYLOSE                                       | 58-86-6               | -0.2102 |
| DIACERIN                                     | 13739-02-1            | -0.2088 |
| MOGUISTEINE                                  | 119637-67-1           | -0.2084 |
| EUPHOL                                       | 514-47-6              | -0.2079 |
| CIANIDANOL [+catechin]                       | 154-23-4              | -0.2070 |
| TOBRAMYCIN                                   | 32986-56-4            | -0.2070 |
| TRIGONELLINE                                 | 535-83-1              | -0.2070 |
| IMEXON                                       | 59643-91-3            | -0.2068 |
| OXYTHIAMINE CHLORIDE HYDROCHLORIDE           | 614-05-1              | -0.2065 |
| MEPARFYLON                                   | 77-75-8               | -0.2053 |
| PHYTONADIONE [5mM]                           | 84-80-0               | -0.2037 |
| OXYMATRINE                                   | 16837-52-8            | -0.2019 |
| NALTREXONE HYDROCHLORIDE                     | 16676-29-2, 16590-41  | -0.2014 |
| COSMOSIIN                                    | 578-74-5              | -0.2010 |
| DIHYDROFISSINOLIDE                           |                       | -0.2010 |
| NEBIVOLOL HYDROCHLORIDE                      | 99200-09-6            | -0.2006 |
| ETHYL DICHLOROORSELLINATE                    |                       | -0.2002 |
| ALISKIREN HEMIFUMARATE                       | 173334-57-1           | -0.1998 |
| 6-HYDROXYFLAVONE                             | 6665-83-4             | -0.1988 |
| 1,7-DIDEACETOXY-1,7-DIOXO-3-DEACETYLKHIVORIN |                       | -0.1960 |
| 5-FLUOROINDOLE-2-CARBOXYLIC ACID             | 399-76-8              | -0.1925 |
| 2-CARENE-3-ONE                               |                       | -0.1868 |
| MYCOPHENOLIC ACID                            | 24280-93-1            | -0.1868 |
| PERILLIC ACID (-)                            | 7694-45-3             | -0.1868 |
| GENISTEIN                                    | 446-72-0              | -0.1853 |
| ABACAVIR SULFATE                             | 188062-50-2           | -0.1846 |
| LARIXINIC ACID                               | 118-71-8              | -0.1834 |
| METHOCARBAMOL                                | 532-03-6              | -0.1829 |
| EPINASTINE HYDROCHLORIDE                     | 80012-43-7            | -0.1827 |
| ENTANDROPHRAGMIN                             | 11013-05-1            | -0.1826 |
| alpha-MANGOSTIN                              | 1551491               | -0.1813 |
| alpha-TOXICAROL (dl)                         | 82-09-7               | -0.1811 |
| APOMORPHINE HYDROCHLORIDE                    | 41372-20-7, 314-19-2  | -0.1796 |
| SULFANILAMIDE                                | 63-74-1               | -0.1795 |
| DIMETHYLFRAXETIN                             | 6035-49-0             | -0.1787 |

|                                   |             |        |
|-----------------------------------|-------------|--------|
| Ribostamycin sulfate salt         | 53797-35-6  | 0.7064 |
| Metolazone                        | 17560-51-9  | 0.7082 |
| Palonosetron hydrochloride        | 135729-62-3 | 0.7094 |
| GBR 12909 dihydrochloride         | 67469-78-7  | 0.7100 |
| Tenoxicam                         | 59804-37-4  | 0.7115 |
| Cefuroxime sodium salt            | 56238-63-2  | 0.7153 |
| Mefenamic acid                    | 61-68-7     | 0.7153 |
| Zafirlukast                       | 107753-78-6 | 0.7175 |
| Trimethoprim                      | 738-70-5    | 0.7227 |
| Dolasetron mesilate               | 115956-13-3 | 0.7229 |
| Oxaprozin                         | 21256-18-8  | 0.7231 |
| Pyrantel tartrate                 | 33401-94-4  | 0.7246 |
| Atovaquone                        | 95233-18-4  | 0.7246 |
| Mitotane                          | 53-19-0     | 0.7306 |
| Acipimox                          | 51037-30-0  | 0.7342 |
| Toltrazuril                       | 69004-03-1  | 0.7375 |
| Avobenzon                         | 70356-09-1  | 0.7415 |
| Dienestrol                        | 84-17-3     | 0.7509 |
| Nafcillin sodium salt monohydrate | 7177-50-6   | 0.7549 |
| Oxytetracycline dihydrate         | 6153-64-6   | 0.7576 |
| Saquinavir mesylate               | 149845-06-7 | 0.7610 |
| Serotonin hydrochloride           | 153-98-0    | 0.7628 |
| Iohexol                           | 66108-95-0  | 0.7638 |
| Pirenperone                       | 75444-65-4  | 0.7657 |
| Clopidogrel                       | 113665-84-2 | 0.7696 |
| Sulfamethoxazole                  | 723-46-6    | 0.7720 |
| Meclocycline sulfosalicylate      | 73816-42-9  | 0.7721 |
| Ethinylestradiol                  | 57-63-6     | 0.7746 |
| Flunarizine dihydrochloride       | 30484-77-6  | 0.7762 |
| Capecitabine                      | 154361-50-9 | 0.7765 |
| Vancomycin hydrochloride          | 1404-93-9   | 0.7807 |
| Etifenin                          | 63245-28-3  | 0.7816 |
| Rifampicin                        | 13292-46-1  | 0.7827 |
| Valproic acid                     | 99-66-1     | 0.7926 |
| Bimatoprost                       | 155206-00-1 | 0.7971 |
| Papaverine hydrochloride          | 61-25-6     | 0.7987 |
| Ambrisentan                       | 177036-94-1 | 0.7994 |
| Anethole-trithione                | 532-11-6    | 0.8013 |
| Alfuzosin hydrochloride           | 81403-68-1  | 0.8016 |
| Nifekalant                        | 130636-43-0 | 0.8133 |
| Ozagrel hydrochloride             | 78712-43-3  | 0.8140 |
| Dehydrocholic acid                | 81-23-2     | 0.8163 |
| Irbesartan                        | 138402-11-6 | 0.8192 |
| Thiamphenicol                     | 15318-45-3  | 0.8193 |
| Grepafloxacin                     | 146863-02-7 | 0.8238 |
| Xylazine                          | 7361-61-7   | 0.8243 |
| Didanosine                        | 69655-05-6  | 0.8254 |
| Enalaprilat dihydrate             | 84680-54-6  | 0.8273 |
| Clioquinol                        | 130-26-7    | 0.8287 |
| Suprofen                          | 40828-46-4  | 0.8299 |
| Lincomycin hydrochloride          | 859-18-7    | 0.8363 |
| Ethamivan                         | 304-84-7    | 0.8368 |
| Betazole hydrochloride            | 138-92-1    | 0.8383 |
| Biotin                            | 58-85-5     | 0.8417 |
| Iocetamic acid                    | 16034-77-8  | 0.8504 |
| Vecuronium bromide                | 50700-72-6  | 0.8504 |
| Besifloxacin hydrochloride        | 141388-76-3 | 0.8545 |
| Floxacin                          | 79660-72-3  | 0.8550 |
| Ranitidine hydrochloride          | 66357-59-3  | 0.8626 |
| Thiocolchicoside                  | 602-41-5    | 0.8717 |
| Tolcapone                         | 134308-13-7 | 0.8816 |
| Celecoxib                         | 169590-42-5 | 0.8910 |
| Butenafine Hydrochloride          | 101828-21-1 | 0.8932 |
| Bemegride                         | 64-65-3     | 0.8941 |
| Methocarbamol                     | 532-03-6    | 0.8970 |
| Levofloxacin                      | 100986-85-4 | 0.8980 |
| Azathioprine                      | 446-86-6    | 0.9085 |
| Salbutamol                        | 18559-94-9  | 0.9094 |
| Flucloxacillin sodium             | 1847-24-1   | 0.9096 |
| Felbinac                          | 5728-52-9   | 0.9134 |
| Enoxacin                          | 84294-96-2  | 0.9217 |
| Norethindrone                     | 68-22-4     | 0.9399 |
| Acenocoumarol                     | 152-72-7    | 0.9460 |
| Mometasone furoate                | 83919-23-7  | 0.9612 |

|                                |                        |         |
|--------------------------------|------------------------|---------|
| PHENOLSULFONPHTHALEIN          | 143-74-8               | -0.1787 |
| TOLBUTAMIDE                    | 64-77-7                | -0.1782 |
| NEPAFENAC                      | 78281-72-8             | -0.1781 |
| MEFEXAMIDE HYDROCHLORIDE       | 1227-61-8              | -0.1781 |
| CEFTAZOLE                      | 26973-24-0             | -0.1774 |
| PROGESTERONE                   | 57-83-0                | -0.1746 |
| SMILAGENIN                     | 126-18-1               | -0.1699 |
| RIFAXIMIN                      | 80621-81-4             | -0.1695 |
| DEXAMETHASONE SODIUM PHOSPHATE | 2392-39-4, 312-93-6 [  | -0.1686 |
| DICLOXACILLIN SODIUM           | 13412-64-1, 343-55-5   | -0.1673 |
| DEOXYPEGANINE HYDROCHLORIDE    | 61939-05-7             | -0.1664 |
| DIATRIZOIC ACID                | 117-96-4               | -0.1663 |
| 4-HYDROXYBENZOIC ACID          |                        | -0.1652 |
| NORETHYNODREL                  | 68-23-5                | -0.1627 |
| ASPARAGINE (L) HYDRATE         | 5794-13-8              | -0.1616 |
| 7-HYDROXYFLAVONE               | 6665-86-7              | -0.1586 |
| SULFAMERAZINE                  | 127-79-7               | -0.1579 |
| JOSAMYCIN                      | 56689-45-3             | -0.1579 |
| EVERNINIC ACID                 | 570-10-5               | -0.1574 |
| CREATININE                     | 60-27-5                | -0.1562 |
| CAPECITABINE                   | 154361-50-9            | -0.1561 |
| PHYSCION                       | 521-61-9               | -0.1553 |
| KASUGAMYCIN HYDROCHLORIDE      | 19408-46-9, 6980-18-   | -0.1550 |
| NABUMETONE                     | 42924-53-8             | -0.1536 |
| QUINACRINE HYDROCHLORIDE       | 6151-30-0              | -0.1512 |
| GLYCOCHOLIC ACID               | 475-31-0               | -0.1507 |
| FENOFIBRIC ACID                | 42017-89-0             | -0.1505 |
| FLUMETHASONE                   | 2135-17-3              | -0.1502 |
| FLAVANONE                      | 487-26-3               | -0.1502 |
| hederagenin                    | 465-99-6               | -0.1481 |
| EMODIN                         | 518-82-1               | -0.1471 |
| VECURONIUM BROMIDE             | 50700-72-6             | -0.1465 |
| AMIODARONE HYDROCHLORIDE       | 1951-25-3              | -0.1434 |
| ETHOXZOLAMIDE                  | 452-35-7               | -0.1407 |
| CHLORPYRIFOS                   | 2921-88-2              | -0.1405 |
| FOSCARNET SODIUM               | 63585-09-1             | -0.1405 |
| 2-ACETAMIDOFLUORENE            | 53-96-3                | -0.1391 |
| NATEGLINIDE                    | 105816-04-4            | -0.1380 |
| TRICLOSAN                      | 3380-34-5              | -0.1380 |
| XANTHONE                       | 90-47-1                | -0.1380 |
| CEPHALOTHIN SODIUM             | 58-71-9, 153-61-7 [ce  | -0.1357 |
| CEFPODOXIME PROXETIL           | 87239-81-4             | -0.1355 |
| 2-ACETYLPYRROLE                | 1072-83-9              | -0.1339 |
| CEFTIOFUR HYDROCHLORIDE        | 80370-57-6             | -0.1336 |
| LEUCOVORIN CALCIUM             | 1492-18-8              | -0.1322 |
| BRIVUDINE                      | 69304-47-8             | -0.1313 |
| MECYSTEINE HYDROCHLORIDE       | 2485-62-3, 18598-63-   | -0.1311 |
| LOVASTATIN                     | 75330-75-5             | -0.1307 |
| CINCHOPHEN                     | 132-60-5               | -0.1305 |
| SUCRALFATE [5mM]               | 54182-58-0 (free acid) | -0.1301 |
| GLUCONOLACTONE                 | 90-80-2                | -0.1299 |
| DICTAMNINE                     | 484-29-7               | -0.1284 |
| CARAPIN                        | 3463-88-5              | -0.1272 |
| N-METHYL-D-ASPARTIC ACID       | 6384-92-5              | -0.1259 |
| ISOXSUPRINE HYDROCHLORIDE      | 579-56-6, 395-28-8 [is | -0.1215 |
| ZOLEDRONIC ACID                | 165800-06-6            | -0.1215 |
| DIALLYL SULFIDE                | 592-88-1               | -0.1208 |
| MELATONIN                      | 73-31-4                | -0.1207 |
| DACARBAZINE                    | 891986                 | -0.1171 |
| LAWSONE METHYL ETHER           | 2348-82-5              | -0.1171 |
| ROXITHROMYCIN                  | 80214-83-1             | -0.1168 |
| THIODIGLYCOL                   | 111-48-8               | -0.1166 |
| alpha-HYDROXYDEOXYCHOLIC ACID  | 83-49-8                | -0.1164 |
| NIFURSOL                       | 16915-70-1             | -0.1155 |
| PHYSOSTIGMINE SALICYLATE       | 57-64-7                | -0.1151 |
| BIAPENEM                       | 120410-24-4            | -0.1143 |
| LECANORIC ACID                 | 480-56-8               | -0.1139 |
| TRANILAST                      | 53902-12-8             | -0.1137 |
| DAPSONE                        | 80-08-0                | -0.1092 |
| PODOTOTARIN                    |                        | -0.1087 |
| CARBARIL                       | 63-25-2                | -0.1086 |
| ASCORBIC ACID                  | 50-81-7                | -0.1078 |
| SPICULISPORIC ACID             | 469-77-2               | -0.1074 |
| RHAMNETIN                      | 90-19-7                | -0.1065 |



|                                        |             |        |
|----------------------------------------|-------------|--------|
| Valacyclovir hydrochloride             | 124832-27-5 | 0.9713 |
| Sulfapyridine                          | 144-83-2    | 0.9966 |
| Liranaftate                            | 88678-31-3  | 0.9980 |
| Azilsartan kamedoxomil                 | 863031-21-4 | 1.0022 |
| Guanfacine hydrochloride               | 29110-48-3  | 1.0053 |
| Triamterene                            | 396-01-0    | 1.0141 |
| Clozantel                              | 57808-65-8  | 1.0167 |
| Ethamsylate                            | 2624-44-4   | 1.0188 |
| Sulmazole                              | 73384-60-8  | 1.0288 |
| Gliclazide                             | 21187-98-4  | 1.0339 |
| Spaglumic acid                         | 3106-85-2   | 1.0349 |
| Cyclopenthiiazide                      | 742-20-1    | 1.0377 |
| THIP Hydrochloride                     | 85118-33-8  | 1.0412 |
| Diloxanide furoate                     | 3736-81-0   | 1.0527 |
| Fludarabine                            | 21679-14-1  | 1.0540 |
| Montelukast                            | 158966-92-8 | 1.0579 |
| Benzylpenicillin sodium                | 69-57-8     | 1.0601 |
| Bethanechol chloride                   | 590-63-6    | 1.0667 |
| Acyclovir                              | 59277-89-3  | 1.0742 |
| Oxymetholone                           | 434-07-1    | 1.0752 |
| Phensuximide                           | 86-34-0     | 1.0886 |
| Econazole nitrate                      | 24169-02-6  | 1.0910 |
| Gestrinone                             | 16320-04-0  | 1.0925 |
| Altrenogest                            | 850-52-2    | 1.0999 |
| Ezetimibe                              | 163222-33-1 | 1.1023 |
| Gabexate mesilate                      | 56974-61-9  | 1.1116 |
| Dimaprit dihydrochloride               | 23256-33-9  | 1.1179 |
| Piracetam                              | 7491-74-9   | 1.1184 |
| Trimebutine                            | 39133-31-8  | 1.1213 |
| Denatonium benzoate                    | 3734-33-6   | 1.1241 |
| Adenosine 5'-monophosphate monohydrate | 18422-05-4  | 1.1273 |
| Ibandronate sodium                     | 114084-78-5 | 1.1292 |
| Methantheline bromide                  | 53-46-3     | 1.1365 |
| Butalbital                             | 77-26-9     | 1.1474 |
| Fulvestrant                            | 129453-61-8 | 1.1532 |
| Dropropizine (R,S)                     | 17692-31-8  | 1.1595 |
| Spiramycin                             | 8025-81-8   | 1.1610 |
| Amlexanox                              | 68302-57-8  | 1.1626 |
| Penciclovir                            | 39809-25-1  | 1.1627 |
| Methylprednisolone, 6-alpha            | 83-43-2     | 1.1632 |
| Homoveratrylamine                      | 120-20-7    | 1.1695 |
| Bisoprolol fumarate                    | 104344-23-2 | 1.1720 |
| Perindopril                            | 82834-16-0  | 1.1843 |
| Aceclofenac                            | 89796-99-6  | 1.2002 |
| Azacytidine-5                          | 320-67-2    | 1.2318 |
| Chlorpropamide                         | 94-20-2     | 1.2421 |
| Camptothecin (S,+)                     | 2114454     | 1.2613 |
| Pivampicillin                          | 33817-20-8  | 1.2641 |
| Sulfadimethoxine                       | 122-11-2    | 1.2662 |
| Tulobuterol                            | 41570-61-0  | 1.2780 |
| Ampicillin trihydrate                  | 7177-48-2   | 1.3417 |
| Alfacalcidol                           | 41294-56-8  | 1.3421 |
| Chloroxine                             | 773-76-2    | 1.3426 |
| Loteprednol etabonate                  | 82034-46-6  | 1.3461 |
| Triclosan                              | 3380-34-5   | 1.3758 |
| Antimycin A                            | 1397-94-0   | 1.3894 |
| Cefprozil                              | 121123-17-9 | 1.3949 |
| Estriol                                | 50-27-1     | 1.4021 |
| Novobiocin sodium salt                 | 1476-53-5   | 1.4043 |
| Panthenol (D)                          | 81-13-0     | 1.4164 |
| Estradiol Valerate                     | 979-32-8    | 1.4217 |
| Thioguanosine                          | 85-31-4     | 1.4262 |
| Moxifloxacin                           | 151096-09-2 | 1.4293 |
| Etomidate                              | 33125-97-2  | 1.4344 |
| Risedronic acid monohydrate            | 105462-24-6 | 1.4362 |
| Bromhexine hydrochloride               | 611-75-6    | 1.4409 |
| Cortisone                              | 53-06-5     | 1.4514 |
| Ticlopidine hydrochloride              | 53885-35-1  | 1.4528 |
| Buspirone hydrochloride                | 33386-08-2  | 1.4549 |
| Tridihexethyl chloride                 | 4310-35-4   | 1.4567 |
| Isometheptene mucate                   | 7492-31-1   | 1.4706 |
| Oxibendazol                            | 20559-55-1  | 1.4905 |
| Ibudilast                              | 50847-11-5  | 1.5011 |
| Flubendazol                            | 31430-15-6  | 1.5186 |

|                                              |                         |         |
|----------------------------------------------|-------------------------|---------|
| UTILIN                                       | 31218-22-1              | -0.1047 |
| CANAVANINE                                   | 543-38-4                | -0.1046 |
| HALAZONE                                     | 80-13-7                 | -0.1044 |
| AVOCADYNE ACETATE                            | 24607-06-5              | -0.1043 |
| BETAMETHASONE 17,21-DIPROPIONATE             | 5593-20-4               | -0.1041 |
| PIRINIXIC ACID                               | 50892-23-4              | -0.1036 |
| LORATADINE                                   | 79794-75-5              | -0.1031 |
| 2',2'-BISEPIGALLOECATECHIN DIGALLATE         |                         | -0.1025 |
| ENALAPRILAT                                  | 84680-54-6              | -0.1025 |
| PHENYL BUTAZONE                              | 50-33-9                 | -0.1025 |
| NIMUSTINE HYDROCHLORIDE                      | 55661-38-6              | -0.1020 |
| 3-ACETAMIDOCOUMARIN                          | 779-30-6                | -0.1015 |
| KHIVORIN                                     | 2524-38-1               | -0.0999 |
| CARBAZOCHROME                                | 69-81-8                 | -0.0996 |
| PIRENZEPINE HYDROCHLORIDE                    | 29868-97-1, 28797-61    | -0.0988 |
| NIMESULIDE                                   | 51803-78-2              | -0.0982 |
| APRAMYCIN SULFATE                            | 65710-07-8              | -0.0981 |
| CRESOPIRINE                                  | 4386-39-4               | -0.0976 |
| SUCCIMER                                     | 304-55-2                | -0.0973 |
| STRYCHNINE METHIODIDE                        |                         | -0.0962 |
| TYRAMINE                                     | 51-67-2                 | -0.0958 |
| EPIESTRIOL                                   | 547-81-9                | -0.0951 |
| SULBENTINE                                   | 350-12-9                | -0.0929 |
| CATECHIN TETRAMETHYLETHER                    |                         | -0.0890 |
| DIBENZOTHIOPHENE                             | 132-65-0                | -0.0883 |
| TELITHROMYCIN                                | 191114-48-4             | -0.0883 |
| PERINDOPRIL ERBUMINE                         | 107133-36-8; 82834-1    | -0.0879 |
| ACETYLCHOLINE CHLORIDE                       | 60-31-1, 51-84-3 [acef] | -0.0864 |
| BENZOIC ACID                                 | 65-85-0                 | -0.0856 |
| HYGROMYCIN B                                 | 31282-04-9              | -0.0855 |
| FELODIPINE                                   | 72509-76-3              | -0.0843 |
| ISOXICAM                                     | 34552-84-6              | -0.0842 |
| 4'-HYDROXYCHALCONE                           | 2657-25-2               | -0.0835 |
| PIMAGEDINE HYDROCHLORIDE                     | 1937-19-5               | -0.0827 |
| MALEIC ACID                                  | 110-16-7                | -0.0816 |
| CYTIDINE                                     | 65-46-3                 | -0.0802 |
| DOBUTAMINE HYDROCHLORIDE                     | 49745-95-1, 34368-04    | -0.0800 |
| BETAMETHASONE VALERATE                       | 2152-44-5               | -0.0794 |
| CEFOTETAN                                    | 6971256-7               | -0.0777 |
| DIHYDRODEHYDROEROSONE                        |                         | -0.0771 |
| AJMALINE                                     | 4360-17-7               | -0.0768 |
| GLIQUIDONE                                   | 33342-05-1              | -0.0761 |
| EUPATORIOCHROMENE                            | 19013-03-7              | -0.0750 |
| AMMONIUM LACTATE                             | 52003-58-4              | -0.0746 |
| EVANS BLUE                                   | 314-13-6                | -0.0739 |
| CEFPROZIL                                    | 121123-17-9             | -0.0731 |
| ANTIMYCIN A (A1 shown)                       | 1397-94-0               | -0.0724 |
| N-METHYL-L-ISOLEUCINE                        | 5125-98-8               | -0.0722 |
| BISOPROLOL FUMARATE                          | 104344-23-2             | -0.0711 |
| HYOSCYAMINE                                  | 101-31-5                | -0.0703 |
| O-BENZYL-L-SERINE                            |                         | -0.0701 |
| GLYBURIDE                                    | 10238-21-8              | -0.0696 |
| IPRONIAZID PHOSPHATE                         | 305-33-9                | -0.0684 |
| CYANIDIN CHLORIDE                            | 528-58-5                | -0.0660 |
| ADIPHENINE HYDROCHLORIDE                     | 50-42-0, 64-95-9 [adip] | -0.0659 |
| EPALRESTAT                                   | 82159-09-9              | -0.0657 |
| MOEXIPRIL HYDROCHLORIDE                      | 82586-52-5              | -0.0657 |
| SULFANILATE ZINC                             | 31884-76-1              | -0.0648 |
| ALANYL-DL-LEUCINE                            |                         | -0.0646 |
| ACONITIC ACID                                | 585-84-2                | -0.0643 |
| DOXEPIN HYDROCHLORIDE                        | 1229-29-4, 1668-19-5    | -0.0634 |
| ESTRIOL                                      | 50-27-1, 514-68-1 [as]  | -0.0626 |
| SUCRALOSE                                    | 56038-13-2              | -0.0621 |
| 2-HYDROXY-5 (6)EPOXY-TETRAHYDROCARVOPHYLLENE |                         | -0.0619 |
| PIPERONYLIC ACID                             | 94-53-1                 | -0.0618 |
| DIENESTROL                                   | 84-17-3, 13029-44-2 [   | -0.0613 |
| PYRIDOXINE HYDROCHLORIDE                     | 65-23-6                 | -0.0611 |
| ISOVANILLIN                                  | 621-59-0                | -0.0583 |
| 4-HYDROXYBENZYL ALCOHOL                      | 623-05-2                | -0.0581 |
| SEDANOIC ACID                                | 6697-07-0               | -0.0579 |
| RACECADOTRIL                                 | 81110-73-8              | -0.0546 |
| SIMVASTATIN                                  | 79902-63-9              | -0.0546 |
| ALLANTOIN                                    | 97-59-6                 | -0.0510 |
| PALMIDROL [5mM]                              | 544-31-0                | -0.0510 |

|                                     |             |        |
|-------------------------------------|-------------|--------|
| 5-fluorouracil                      | 51-21-8     | 1.5409 |
| Flavoxate hydrochloride             | 3717-88-2   | 1.5680 |
| Oxolinic acid                       | 14698-29-4  | 1.5755 |
| Nelfinavir mesylate                 | 159989-65-8 | 1.6268 |
| Trazodone hydrochloride             | 25332-39-2  | 1.6544 |
| Tranexamic acid                     | 1197-18-8   | 1.6602 |
| Methylhydantoin-5-(L)               | 40856-73-3  | 1.6824 |
| Enilconazole                        | 35554-44-0  | 1.6949 |
| Ribavirin                           | 36791-04-5  | 1.7717 |
| Ipriflavone                         | 35212-22-7  | 1.7790 |
| Vidarabine                          | 5536-17-4   | 1.8211 |
| Clotrimazole                        | 23593-75-1  | 1.8255 |
| Naftifine hydrochloride             | 65473-14-5  | 1.9069 |
| Milrinone                           | 78415-72-2  | 1.9478 |
| Ioxaglic acid                       | 59017-64-0  | 1.9667 |
| Fexofenadine hydrochloride          | 153439-40-8 | 1.9702 |
| Abacavir Sulfate                    | 188062-50-2 | 1.9757 |
| Rabeprazole Sodium salt             | 117976-89-3 | 1.9944 |
| Pyrimethamine                       | 58-14-0     | 2.0067 |
| Oxfendazol                          | 53716-50-0  | 2.0803 |
| Aliskiren hemifumarate              | 173334-57-1 | 2.0825 |
| Floxuridine                         | 50-91-9     | 2.1169 |
| Clofibrate                          | 637-07-0    | 2.1514 |
| Albendazole                         | 54965-21-8  | 2.1537 |
| Doxycycline hydrochloride           | 10592-13-9  | 2.2031 |
| Benzoxiquine                        | 86-75-9     | 2.2160 |
| Azaguanine-8                        | 134-58-7    | 2.2204 |
| Dexrazoxane hydrochloride           | 24584-09-6  | 2.2301 |
| Amethopterin (R,S)                  | 60388-53-6  | 2.4635 |
| Raltitrexed                         | 112887-68-0 | 2.9269 |
| Fenbendazole                        | 43210-67-9  | 3.7991 |
| Trifluridine                        | 70-00-8     | 4.3369 |
| Pemetrexed disodium                 | 357166-30-4 | 4.7140 |
| Irinotecan hydrochloride trihydrate | 136572-09-3 |        |
| Methiazole                          | 108579-67-5 |        |
| Articaine hydrochloride             | 23964-57-0  |        |
| Monobenzene                         | 103-16-2    |        |
| Mebendazole                         | 31431-39-7  |        |
| Formoterol fumarate                 | 43229-80-7  |        |
| Nocodazole                          | 31430-18-9  |        |
| Paclitaxel                          | 33069-62-4  |        |
| Bosentan                            | 147536-97-8 |        |
| Colchicine                          | 64-86-8     |        |
| Parbendazole                        | 14255-87-9  |        |
| Cytarabine                          | 147-94-4    |        |
| Acetpromazine maleate salt          | 3598-37-6   |        |
| Adapalene                           | 106685-40-9 |        |
| Alexidine dihydrochloride           | 22573-93-9  |        |
| Aminacrine                          | 90-45-9     |        |
| Amlodipine                          | 88150-42-9  |        |
| Astemizole                          | 68844-77-9  |        |
| Auranofin                           | 34031-32-8  |        |
| Avermectin B1                       | 71751-41-2  |        |
| Bacampicillin hydrochloride         | 37661-08-8  |        |
| Benzethonium chloride               | 121-54-0    |        |
| Buflomedil hydrochloride            | 35543-24-9  |        |
| Carteolol hydrochloride             | 51781-21-6  |        |
| Ciclopirox ethanolamine             | 41621-49-2  |        |
| Cladribine                          | 4291-63-8   |        |
| Cycloheximide                       | 66-81-9     |        |
| Daunorubicin hydrochloride          | 23541-50-6  |        |
| Delavirdine                         | 136817-59-9 |        |
| Digoxin                             | 20830-75-5  |        |
| Docetaxel                           | 114977-28-5 |        |
| Doxorubicin hydrochloride           | 25316-40-9  |        |
| Epirubicin hydrochloride            | 56390-09-1  |        |
| Eserine hemisulfate salt            | 64-47-1     |        |
| Etoposide                           | 33419-42-0  |        |
| Fendiline hydrochloride             | 13636-18-5  |        |
| Fomepizole                          | 7554-65-6   |        |
| Gatifloxacin                        | 112811-59-3 |        |
| Gefitinib                           | 184475-35-2 |        |
| Gemcitabine                         | 95058-81-4  |        |
| Hycanthone                          | 3105-97-3   |        |

|                                      |                       |         |
|--------------------------------------|-----------------------|---------|
| LARIXOL ACETATE                      |                       | -0.0509 |
| 2'-HYDROXYCHALCONE                   | 1214-47-7             | -0.0507 |
| LIOTHYRONINE                         | 1823692               | -0.0470 |
| ABRINE (L)                           | 526-31-8              | -0.0469 |
| CARBENOXOLONE SODIUM                 | 7421-40-1, 5697-56-3  | -0.0465 |
| NICOTINYL ALCOHOL TARTRATE           | 100-55-0              | -0.0460 |
| L-LEUCYL-L-ALANINE                   | 7298-84-2             | -0.0445 |
| 2',4'-DIHYDROXYCHALCONE 4'-GLUCOSIDE |                       | -0.0439 |
| CLARITHROMYCIN                       | 81103-11-9            | -0.0413 |
| MICONAZOLE NITRATE                   | 22832-87-7, 22916-47  | -0.0406 |
| HETEROPEUCENIN, METHYL ETHER         | 26213-95-6            | -0.0397 |
| ETODOLAC                             | 41340-25-4            | -0.0390 |
| PRENYLETIN                           | 15870-91-4            | -0.0348 |
| PECTOLINARIN                         | 28978-02-1            | -0.0333 |
| ZIDOVUDINE [AZT]                     | 30516-87-1            | -0.0322 |
| PHENYLPIRUVIC ACID                   | 156-06-9              | -0.0317 |
| METHYLPREDNISOLONE SODIUM SUCCINATE  | 173553                | -0.0308 |
| MECLIZINE HYDROCHLORIDE              | 31884-77-2, 1104-22-  | -0.0303 |
| FLOPROPIONE                          | 2295-58-1             | -0.0295 |
| APIGENIN                             | 520-36-5              | -0.0290 |
| DEQUALINIUM CHLORIDE                 | 522-51-0              | -0.0287 |
| PYRIPROXYFEN                         | 95737-68-1            | -0.0287 |
| BETULINIC ACID                       | 472-15-1              | -0.0284 |
| CHLORAMINE-T                         | 127-65-1              | -0.0278 |
| PALIPERIDONE                         | 144598-74-4           | -0.0271 |
| SODIUM CYCLAMATE                     | 100-88-9(acid)        | -0.0271 |
| MYRICETIN                            | 529-44-2              | -0.0269 |
| SULFISOXAZOLE ACETYL                 | 80-74-0               | -0.0265 |
| 5,7,4'-TRIMETHOXYISOFLAVONE          | 1162-82-9             | -0.0259 |
| DEGUELIN(-)                          | 522-17-8              | -0.0257 |
| IPRIFLAVONE                          | 35212-22-7            | -0.0243 |
| BUCETIN                              | 1083-57-4             | -0.0243 |
| CARBOPLATIN                          | 41575-94-4            | -0.0236 |
| MELIBIOSE                            | 585-99-9              | -0.0230 |
| MELPERONE HYDROCHLORIDE              | 3575-80-2             | -0.0227 |
| LEFLUNOMIDE                          | 75706-12-6            | -0.0216 |
| CEFACLOR                             | 70356-03-5, 53994-73  | -0.0201 |
| LUPEOL ACETATE                       | 1617-68-1             | -0.0201 |
| SPARTEINE SULFATE                    | 6160-12-9, 299-39-8 [ | -0.0187 |
| OSAJIN                               | 482-53-1              | -0.0179 |
| PENTAGASTRIN                         | 5534-95-2             | -0.0179 |
| L(-)-SORBOSE                         | 87-79-6               | -0.0167 |
| PALMATINE CHLORIDE                   | 10605-02-4            | -0.0158 |
| 3,7-DIHYDROXYFLAVONE                 | 492-00-2              | -0.0152 |
| BISMUTH SUBSALICYLATE                | 14882-18-9            | -0.0152 |
| ACTINOQUINOL SODIUM                  | 1952772               | -0.0115 |
| RHOIFOLIN                            | 17306-46-6            | -0.0115 |
| QUINIC ACID                          | 77-95-2               | -0.0076 |
| PICROTIN                             | 21416-53-5            | -0.0068 |
| TIOCONAZOLE                          | 65899-73-2            | -0.0051 |
| CALCIUM GLUCEPTATE                   | 29039-00-7            | -0.0043 |
| QUININE HDROCHLORIDE                 | 6119-47-7             | -0.0042 |
| beta-NAPHTHOL                        | 135-19-3              | -0.0031 |
| FLUOROURACIL                         | 51-21-8               | -0.0013 |
| PROTOPORPHYRIN IX                    | 553-12-8              | -0.0002 |
| PROPIDIUM IODIDE                     | 25535-16-4            | 0.0012  |
| CITALOPRAM HYDROBROMIDE              | 59729-33-8            | 0.0013  |
| TRANEXAMIC ACID                      | 1197-18-8 (acid)      | 0.0031  |
| DICYANDIAMIDE                        | 461-58-5              | 0.0033  |
| PIMPINELLIN                          | 131-12-4              | 0.0036  |
| DJENKOLIC ACID                       | 28052-93-9            | 0.0037  |
| NEROLIDOL                            | 7212-44-4             | 0.0042  |
| TYROSINE HYDROCHLORIDE               | 60-18-4               | 0.0054  |
| MEROGEDUNIN                          |                       | 0.0058  |
| TIAPRIDE HYDROCHLORIDE               | 51012-32-9            | 0.0066  |
| PROCARBAZINE HYDROCHLORIDE           | 671-16-9              | 0.0090  |
| MARBOFLOXACIN                        | 115550-35-1           | 0.0099  |
| SULFISOMIDINE                        | 515-64-0              | 0.0099  |
| ARTHONOIC ACID                       | 25556-24-5            | 0.0102  |
| TULOButEROL HYDROCHLORIDE            | 41570-61-0            | 0.0126  |
| ATOVAQUONE                           | 95233-18-4            | 0.0131  |
| 3-NOR-3-OXOPANASINSAN-6-OL           |                       | 0.0133  |
| ANAGRELIDE HYDROCHLORIDE             | 58579-51-4            | 0.0140  |
| ATENOLOL                             | 29122-68-7            | 0.0140  |

|                                    |             |  |
|------------------------------------|-------------|--|
| Indatraline hydrochloride          | 86939-10-8  |  |
| Lanatoside C                       | 17575-22-3  |  |
| Mefloquine hydrochloride           | 51773-92-3  |  |
| Methyl benzethonium chloride       | 25155-18-4  |  |
| Mitoxantrone dihydrochloride       | 70476-82-3  |  |
| Nebivolol hydrochloride            | 99200-09-6  |  |
| Paroxetine Hydrochloride           | 110429-35-1 |  |
| Perhexiline maleate                | 6724-53-4   |  |
| Podophyllotoxin                    | 518-28-5    |  |
| Prazosin hydrochloride             | 19237-84-4  |  |
| Prenylamine lactate                | 69-43-2     |  |
| Prochlorperazine dimaleate         | 84-02-6     |  |
| Pyruvium pamoate                   | 3546-41-6   |  |
| Quinacrine dihydrochloride hydrate | 69-05-6     |  |
| Raloxifene hydrochloride           | 82640-04-8  |  |
| Rimantadine Hydrochloride          | 13392-28-4  |  |
| Sertindole                         | 106516-24-9 |  |
| Sertraline                         | 79617-96-2  |  |
| Simvastatin                        | 79902-63-9  |  |
| Suloctidil                         | 54063-56-8  |  |
| Tamoxifen citrate                  | 54965-24-1  |  |
| Tegaserod maleate                  | 189188-57-6 |  |
| Terfenadine                        | 50679-08-8  |  |
| Thiethylperazine dimaleate         | 52239-63-1  |  |
| Thioridazine hydrochloride         | 130-61-0    |  |
| Thonzonium bromide                 | 553-08-2    |  |
| Topotecan                          | 123948-87-8 |  |
| Vorinostat                         | 149647-78-9 |  |

|                                                   |                        |        |
|---------------------------------------------------|------------------------|--------|
| ETHIONAMIDE                                       | 536-33-4               | 0.0140 |
| beta-AMYRIN BENZOATE                              | 3607-93-0              | 0.0147 |
| DEXCHLORPHENIRAMINE MALEATE                       | 2438-32-6              | 0.0157 |
| SITAGLIPTIN PHOSPHATE                             | 486460-32-6            | 0.0166 |
| THIABENDAZOLE                                     | 148-79-8               | 0.0179 |
| FLOXURIDINE                                       | 50-91-9                | 0.0179 |
| CETIRIZINE HYDROCHLORIDE                          | 83881-52-1             | 0.0183 |
| RIBOSTAMYCIN SULFATE                              | 25546-65-0             | 0.0184 |
| FENOFIBRATE                                       | 49562-28-9             | 0.0196 |
| OLANZAPINE                                        | 132539-06-1            | 0.0199 |
| LIMONIN                                           | 1180-71-8              | 0.0205 |
| PREGNENOLONE SUCCINATE                            | 4598-67-8              | 0.0205 |
| ANDIROBIN                                         | 6488-63-7              | 0.0209 |
| GUANFACINE HYDROCHLORIDE                          | 29110-48-3             | 0.0217 |
| 2,3-DIHYDROXY-4-METHOXY-4'-ETHOXYBENZOPHENONE     |                        | 0.0222 |
| KAWAIN                                            | 3155-48-4              | 0.0229 |
| CHLORTHALIDONE                                    | 77-36-1                | 0.0250 |
| ACETOSYRINGONE                                    | 2478-38-8              | 0.0267 |
| BRUCINE                                           | 4845-99-2, 357-57-3 [  | 0.0269 |
| NIACINAMIDE                                       | 98-92-0                | 0.0279 |
| NORGESTIMATE                                      | 35189-28-7             | 0.0287 |
| CLOSANTEL                                         | 57808-65-8             | 0.0293 |
| CARBENICILLIN DISODIUM                            | 4800-94-6, 4697-36-3   | 0.0297 |
| PIRACETAM                                         | 7491-74-9              | 0.0303 |
| FENSPIRIDE HYDROCHLORIDE                          | 5053-08-7, 5053-06-5   | 0.0304 |
| IRSOGLADINE MALEATE                               | 84504-69-8, 57381-26   | 0.0304 |
| 7-DEHYDROXYCHOL-8(14)-ENIC ACID                   |                        | 0.0314 |
| CARMINIC ACID                                     | 1260-17-9              | 0.0314 |
| LUPANYL ACID HYDROCHLORIDE                        |                        | 0.0314 |
| TRIA CETIN                                        | 102-76-1               | 0.0314 |
| AMPYRONE                                          | 83-07-8                | 0.0324 |
| RAMIFENAZONE                                      | 3615-24-5              | 0.0332 |
| 3-HYDROXY-4-(SUCCIN-2-YL)-CARYOLANE delta-LACTONE |                        | 0.0352 |
| CHLORINDIONE                                      | 1146-99-2              | 0.0354 |
| ROXARSONE                                         | 121-19-7               | 0.0356 |
| GESTODENE                                         | 60282-87-3             | 0.0368 |
| EPIANDROSTERONE BENZOATE                          |                        | 0.0394 |
| ALGINIC ACID [Mol Wt ~200,000; monomers           | 9005-32-7              | 0.0397 |
| SULFASALAZINE                                     | 599-79-1               | 0.0413 |
| TRIAMCINOLONE ACETONIDE                           | 76-25-5                | 0.0419 |
| SULISOBENZONE                                     | 4065-45-6              | 0.0434 |
| AMOROLFINE HYDROCHLORIDE                          | 78613-38-4             | 0.0451 |
| STIGMASTEROL                                      | 83-48-7                | 0.0454 |
| CLOPIDOGREL SULFATE                               | 113665-84-2            | 0.0467 |
| OROTIC ACID                                       | 65-86-1                | 0.0489 |
| BUTYL PARABEN                                     | 94-26-8                | 0.0493 |
| QUERCITRIN                                        | 522-12-3               | 0.0519 |
| ISOBUTYLMETHYLXANTHINE                            |                        | 0.0522 |
| DEOXYKHIVORIN                                     |                        | 0.0525 |
| THIAMYLAL SODIUM                                  | 337-47-3, 77-27-0 [thi | 0.0531 |
| MIDODRINE HYDROCHLORIDE                           | 3092-17-9, 42794-76-   | 0.0531 |
| CEFUROXIME SODIUM                                 | 56238-63-2             | 0.0533 |
| MENBUTONE                                         | 3562-99-0              | 0.0538 |
| L-DEOXYALLIIN                                     | 21593-77-1             | 0.0541 |
| D-LACTITOL MONOHYDRATE                            | 81025-04-9, 585-86-4   | 0.0548 |
| BUSPIRONE HYDROCHLORIDE                           | 33386-08-2             | 0.0563 |
| ANDROSTA-1,4-DIEN-3,17-DIONE                      | 897-06-3               | 0.0569 |
| CARGLUMIC ACID                                    | 1188-38-1              | 0.0572 |
| HALCINONIDE                                       | 3093-35-4              | 0.0595 |
| DROPERIDOL                                        | 548-73-2               | 0.0636 |
| CAPTOPRIL                                         | 62571-86-2             | 0.0644 |
| ACETYLSEROTONIN                                   | 1210-83-9              | 0.0646 |
| ERGOCALCIFEROL                                    | 50-14-6                | 0.0666 |
| TRIFLUMURON                                       | 64628-44-0             | 0.0666 |
| ETHACRIDINE LACTATE                               | 1837-57-6; 6402-23-9   | 0.0671 |
| MEGLUTOL                                          | 503-49-1               | 0.0691 |
| BENZOCAINE                                        | 94-09-7                | 0.0717 |
| METHYLXANTHOXYLIN                                 | 23121-32-6             | 0.0735 |
| DEACETOXY(7)-7-OXOKHIVORINIC ACID                 |                        | 0.0742 |
| FIPRONIL                                          | 120068-37-3            | 0.0750 |
| SURAMIN HEXASODIUM                                | 129-46-4, 145-63-1 [s  | 0.0750 |
| 2-MERCAPTOBENZOTHIAZOLE                           | 149-30-4               | 0.0754 |
| CARSALAM                                          | 2037-95-8              | 0.0764 |
| NEOSTIGMIINE METHYLSULFATE                        | 51-60-5                | 0.0769 |

|                                      |                        |        |
|--------------------------------------|------------------------|--------|
| DROSPIRENONE                         | 67392-87-4             | 0.0772 |
| MANGIFERIN                           | 4773-96-0              | 0.0792 |
| OXCARBAZEPINE                        | 28721-07-5             | 0.0815 |
| TRIMETOZINE                          | 635-41-6               | 0.0815 |
| NILUTAMIDE                           | 63612-50-0             | 0.0818 |
| CLOPIDOL                             | 2971-90-6              | 0.0835 |
| EPICATECHIN                          | 490-46-0               | 0.0843 |
| PRASTERONE                           | 53-43-0                | 0.0843 |
| ALANYL-DI-PHENYLALANINE              |                        | 0.0877 |
| BENDROFLUMETHIAZIDE                  | 73-48-3                | 0.0882 |
| CHLORAZANIL HYDROCHLORIDE            | 2019-25-2              | 0.0894 |
| FIROCOXIB                            | 189954-96-9            | 0.0907 |
| CEFTRIAZONE SODIUM TRIHYDRATE        | 104376-79-6, 73384-5   | 0.0909 |
| CEFOPERAZONE                         | 62893-20-3             | 0.0914 |
| JUAREZIC ACID                        | 1552-94-9              | 0.0916 |
| ENOXOLONE                            | 471-53-4               | 0.0926 |
| RIZATRIPTAN BENZOATE                 | 144034-80-0            | 0.0935 |
| HAEMATOKSYLIN                        | 517-28-2               | 0.0945 |
| OFLOXACIN                            | 82419-36-1 (acid)      | 0.0945 |
| SERATRODAST                          | 112665-43-7            | 0.0951 |
| PHENYLACETOHYDROXAMIC ACID           |                        | 0.0951 |
| EUGENOL                              | 97-53-0                | 0.0953 |
| CHLORAMBUCIL                         | 305-03-3               | 0.0959 |
| EXEMESTANE                           | 107868-30-4            | 0.0959 |
| LEOIDIN                              | 105350-54-7            | 0.0966 |
| CRYOFLURANE                          | 76-14-2                | 0.0968 |
| GADOTERIDOL                          | 120066-54-8            | 0.0977 |
| MORIN                                | 480-16-0               | 0.0991 |
| PENTYLENETETRAZOL                    | 54-95-5                | 0.0994 |
| CYCLOLEUCINE                         | 52-52-8                | 0.1015 |
| BARBITAL                             | 57-44-3                | 0.1028 |
| ACACETIN                             | 480-44-4               | 0.1035 |
| TRIPLENNAMINE CITRATE                | 6138-56-3, 91-81-6 [tr | 0.1038 |
| QUININE ETHYL CARBONATE              | 83-75-0                | 0.1069 |
| SKYRIN                               | 602-06-2               | 0.1072 |
| ADONITOL                             | 488-81-3               | 0.1075 |
| d,l-threo-3-HYDROXYASPARTIC ACID     | 4294-45-5              | 0.1075 |
| PIDOLIC ACID                         | 98-79-3                | 0.1075 |
| ALTRETAMINE                          | 645-05-6               | 0.1091 |
| MELENGESTROL ACETATE                 | 2919-66-6              | 0.1102 |
| TIRATRICOL                           | 51-24-1                | 0.1111 |
| NAPHAZOLINE HYDROCHLORIDE            | 550-99-2, 835-31-4 [n  | 0.1125 |
| PUERARIN                             | 3681-99-0              | 0.1127 |
| SULCONAZOLE NITRATE                  | 61318-91-0, 61318-90   | 0.1127 |
| BENDAMUSTINE HYDROCHLORIDE           | 3543-75-7              | 0.1128 |
| METHYLPREDNISOLONE                   | 83-43-2                | 0.1128 |
| CINOCTRAMIDE                         | 28598-08-5             | 0.1144 |
| PARAXANTHINE                         | 611-59-6               | 0.1158 |
| BUTOPYRNOXYL                         | 532-34-3               | 0.1162 |
| SANTONIN                             | 481-06-1               | 0.1164 |
| LEVOMILNACIPRAN HYDROCHLORIDE        | 175131-60-9            | 0.1167 |
| ACETYL EVERNINIC ACID                |                        | 0.1202 |
| STREPTOMYCIN SULFATE [5mM; 10% aq DM | 3810-74-0              | 0.1202 |
| 3',6-DIHYDROXYFLAVONE                | 71592-46-6             | 0.1221 |
| TOLMETIN SODIUM                      | 64490-92-2, 26171-23   | 0.1224 |
| AMINOGLUTETHIMIDE                    | 125-84-8               | 0.1238 |
| ARPRINOCID                           | 55779-18-5             | 0.1238 |
| DICYCLOHEXYLUREA                     | 2387-23-7              | 0.1258 |
| GALLIC ACID                          | 149-91-7               | 0.1258 |
| COTININE                             | 486-56-6, 5695-98-7 [f | 0.1262 |
| PERINDOPRILAT                        | 95153-31-4             | 0.1262 |
| URETHANE                             | 51-79-6                | 0.1281 |
| METHYLTHIOURACIL                     | 56-04-2                | 0.1301 |
| AMYGDALIN                            | 29883-15-6             | 0.1308 |
| THREONINE (dl)                       | 924-49-2               | 0.1310 |
| NADIFLOXACIN                         | 124858-35-1            | 0.1320 |
| DOXOFYLLINE                          | 69975-86-6             | 0.1323 |
| MEPHENESIN                           | 59-47-2                | 0.1347 |
| NIKETHAMIDE                          | 59-26-7                | 0.1360 |
| CYROMAZINE                           | 66215-27-8             | 0.1370 |
| HYCANTHONE                           | 3105-97-3              | 0.1393 |
| TESTOSTERONE PROPIONATE              | 57-85-2                | 0.1393 |
| TROCLOSENE SODIUM                    | 2893-78-9              | 0.1393 |
| ALOIN                                | 5133-19-7              | 0.1395 |

|                                                        |                       |        |
|--------------------------------------------------------|-----------------------|--------|
| LACCAIC ACID A                                         | 15979-35-8            | 0.1395 |
| METHYL PARATHIONE                                      | 298-00-0              | 0.1398 |
| QUETIAPINE FUMARATE                                    | 111974-69-7           | 0.1399 |
| LAMOTRIGINE                                            | 84057-84-1            | 0.1408 |
| CLINAFOXACIN HYDROCHLORIDE                             | 105956--99-8          | 0.1424 |
| SELENOMETHIONINE                                       | 1464-42-2             | 0.1424 |
| ESTRIOL TRIPROPIONATE                                  | 2236-31-9             | 0.1433 |
| CARNOSINE                                              | 305-84-0              | 0.1440 |
| KHAYASIN C                                             |                       | 0.1440 |
| BRAZILEIN                                              | 600-76-0              | 0.1448 |
| VALSARTAN                                              | 137862-53-4           | 0.1450 |
| GRANISETRON HYDROCHLORIDE                              | 107007-99-8           | 0.1456 |
| TRIAMTERENE                                            | 396-01-0              | 0.1461 |
| FLUTAMIDE                                              | 13311-84-7            | 0.1472 |
| PAROMOMYCIN SULFATE                                    | 1263-89-4, 7542-37-2  | 0.1483 |
| EDETATE DISODIUM                                       | 60-00-4(acid)         | 0.1492 |
| CLIDINIUM BROMIDE                                      | 3485-62-9             | 0.1500 |
| HEMICHOLINIUM BROMIDE                                  | 312-45-8              | 0.1507 |
| SCLAREOLIDE                                            | 564-20-5              | 0.1511 |
| OXYBUTYNIN CHLORIDE                                    | 1508-65-2             | 0.1519 |
| HYMECROMONE METHYL ETHER                               | 2555-28-4             | 0.1527 |
| 1-MONOPALMITIN                                         | 542-44-9              | 0.1532 |
| ADENINE                                                | 73-24-5               | 0.1535 |
| ETHYNODIOL DIACETATE                                   | 297-76-7              | 0.1551 |
| ANGOLENSIN (R)                                         | 4842-48-2             | 0.1558 |
| BEXAROTENE                                             | 153559-49-0           | 0.1565 |
| TRICHLORMETHINE HYDROCHLORIDE                          | 555-77-1              | 0.1582 |
| THEOBROMINE                                            | 83-67-0 [base]        | 0.1586 |
| DEHYDROROTENONE                                        | 30990-44-4            | 0.1590 |
| DICHLOROPROP                                           | 120-36-5              | 0.1595 |
| RABEPRAZOLE SODIUM                                     | 117976-90-6           | 0.1597 |
| DICHLORODIPHENYLTRICHLOROETHANE                        | 50-29-3               | 0.1599 |
| MANNITOL                                               | 69-65-8               | 0.1604 |
| PHENIRAMINE MALEATE                                    | 132-20-7, 86-21-5 [ph | 0.1608 |
| ANTHRAQUINONE                                          | 84-65-1               | 0.1637 |
| GLUTAMINE (D)                                          | 1825942               | 0.1641 |
| SINOMENINE                                             | 115-53-7              | 0.1643 |
| CYPERMETHRIN                                           | 52315-07-8            | 0.1647 |
| CAFFEINE                                               | 58-08-2               | 0.1653 |
| LEVOFLOXACIN                                           | 138199-71-0           | 0.1681 |
| TRIAMCINOLONE DIACETATE                                | 67-78-7               | 0.1681 |
| METHYL 6-METHYL-PYROGALLIN-4-CARBOXLATE TETRAMETHYL ET |                       | 0.1685 |
| XYLAZINE                                               | 23076-35-9, 7361-61-  | 0.1702 |
| ISOSORBIDE MONONITRATE                                 | 16051-77-7            | 0.1708 |
| TRAMIPROSATE                                           | 3687-18-1             | 0.1708 |
| STRYCHNINE SULFATE                                     | 60-41-3               | 0.1712 |
| CYSTAMINE DIHYDROCHLORIDE                              | 56-17-7               | 0.1740 |
| D-ERYTHOBIC ACID                                       | 89-65-6               | 0.1749 |
| GABAPENTIN                                             | 60142-96-3            | 0.1749 |
| SITOSTERYL ACETATE                                     | 915-05-9              | 0.1749 |
| DESONIDE                                               | 638-94-8              | 0.1764 |
| RESORCINOL                                             | 108-46-3              | 0.1766 |
| DICHLOROEVERNIC ACID                                   |                       | 0.1768 |
| MANGOSTIN TRIMETHYL ETHER                              |                       | 0.1768 |
| MITOTANE                                               | 53-19-0               | 0.1769 |
| DEOXYADENOSINE                                         | 16373-93-6            | 0.1773 |
| PROPOXUR                                               | 114-26-1              | 0.1773 |
| THEAFLAVIN DIGALLATE                                   | 30462-35-2            | 0.1777 |
| BICUCULLINE (+)                                        | 485-49-4              | 0.1787 |
| PROPAFENONE HYDROCHLORIDE                              | 34183-22-7, 54063-53  | 0.1790 |
| CREATINE HYDRATE                                       | 6020-87-7             | 0.1798 |
| FLUNARIZINE HYDROCHLORIDE                              | 30484-77-6, 52468-60  | 0.1810 |
| OCTOPAMINE HYDROCHLORIDE                               | 104-14-3              | 0.1810 |
| TERPENE HYDRATE                                        | 201256                | 0.1810 |
| 10-HYDROXYCAMPOTHECIN                                  | 19685-09-7            | 0.1828 |
| AMINOPHYLLINE                                          | 317-34-0              | 0.1843 |
| METHACHOLINE CHLORIDE                                  | 62-51-1, 55-92-5 [met | 0.1845 |
| ANTHRACENE-9-CARBOXYLIC ACID                           | 723-62-6              | 0.1868 |
| PEUCENIN                                               | 578-72-3              | 0.1873 |
| 3-HYDROXYFLAVONE                                       | 577-85-5              | 0.1882 |
| CETILISAT                                              | 282526-98-1           | 0.1896 |
| ASTRAGALOSIDE IV                                       | 84687-43-4            | 0.1899 |
| AMYLENE HYDRATE                                        | 75-85-4               | 0.1902 |
| REPAGLINIDE                                            | 135062-02-1           | 0.1902 |

|                                        |                       |        |
|----------------------------------------|-----------------------|--------|
| ACEDAPSONE                             | 77-46-3               | 0.1913 |
| OBLIQUIN                               | 22161-48-4 [hydrate]  | 0.1929 |
| MENAQUINONE-4                          |                       | 0.1952 |
| SULFAGUANIDINE                         | 57-67-0               | 0.1960 |
| TILMICOSIN                             | 108050-54-0           | 0.1962 |
| BACAMPICILLIN HYDROCHLORIDE            | 37661-08-8, 50972-17  | 0.1977 |
| 7,3'-DIMETHOXYFLAVONE                  |                       | 0.1986 |
| ARTEPAULIN                             | 13902-54-0            | 0.1992 |
| gamma-AMINO BUTYRIC ACID HYDROCHLORIDE | 56-12-2 (base)        | 0.1996 |
| PRILOCAINE HYDROCHLORIDE               | 1786-81-8, 721-50-6 [ | 0.2003 |
| DOXYLAMINE SUCCINATE                   | 562-10-7, 469-21-6 [d | 0.2016 |
| ETEBENECID                             | 1213-06-5             | 0.2031 |
| PIPAMPERONE                            | 1893-33-0             | 0.2043 |
| METYRAPONE                             | 54-36-4               | 0.2044 |
| TOLPERISONE HYDROCHLORIDE              | 70312-00-4            | 0.2045 |
| ESTRAMUSTINE                           | 2998-57-4             | 0.2046 |
| POLYMYXIN B SULFATE                    | 1405-20-5, 1404-26-8  | 0.2060 |
| 7-AMINOCEPHALOSPORANIC ACID            | 957-68-6              | 0.2068 |
| METHIMAZOLE                            | 60-56-0               | 0.2083 |
| SALICYLAMIDE                           | 65-45-2               | 0.2101 |
| PREDNISOLONE HEMISUCCINATE             | 2920-86-7             | 0.2103 |
| SARAFLOXACIN HYDROCHLORIDE             | 91296-87-6            | 0.2109 |
| KYNURENIC ACID                         | 492-27-3              | 0.2109 |
| 2,4-DIMETHOXY-2'-HYDROXYCHALCONE       | 32272-18-7            | 0.2110 |
| ADIPIC ACID                            | 124-04-9              | 0.2119 |
| FIUMAZENIL                             | 78755-81-4            | 0.2129 |
| CYCLOTHIAZIDE                          | 2259-96-3             | 0.2131 |
| COTARNINE CHLORIDE                     | 10018-19-6, 82-54-2 [ | 0.2138 |
| NITROFURANTOIN                         | 67-20-9               | 0.2153 |
| ATROPINE SULFATE                       | 51-55-8, 5908-99-6 [a | 0.2160 |
| LACTULOSE                              | 4618-18-2             | 0.2165 |
| HYDROXYPROGESTERONE                    | 463130                | 0.2176 |
| MODALINE SULFATE                       | 2856-75-9             | 0.2178 |
| DROPROPIZINE                           | 17692-31-8            | 0.2178 |
| ESTRADIOL                              | 50-28-2               | 0.2191 |
| TETRAMIZOLE HYDROCHLORIDE              | 5086-74-8             | 0.2214 |
| DIRITHROMYCIN                          | 62013-04-1            | 0.2215 |
| GLUCOSAMINE HYDROCHLORIDE              | 3416-24-8             | 0.2223 |
| PAZUFLOXACIN MESYLATE                  | 163680-77-1           | 0.2228 |
| GENTISIC ACID                          | 490-79-9              | 0.2231 |
| OXEDRINE                               | 94-07-5               | 0.2239 |
| SULBACTAM                              | 68373-14-8            | 0.2243 |
| URACIL                                 | 66-22-8               | 0.2279 |
| METRONIDAZOLE                          | 443-48-1, 69198-10-3  | 0.2298 |
| ORNITHINE alpha-KETOGLUTARATE          | 5191-97-9, 70-26-8 (b | 0.2306 |
| NEFIRACETAM                            | 77191-36-7            | 0.2313 |
| BEXAROTENE                             | 153559-49-0           | 0.2314 |
| LUFENURON                              | 103055-07-8           | 0.2314 |
| CAPRYLIDENE                            | 538-23-8              | 0.2321 |
| PIPENZOLATE BROMIDE                    | 125-51-9, 13473-38-6  | 0.2321 |
| THIOSTREPTON                           | 1393-48-2             | 0.2335 |
| CORTISONE                              | 53-06-5               | 0.2343 |
| THEOPHYLLINE                           | 5967-84-0             | 0.2363 |
| MODAFINIL                              | 68693-11-8            | 0.2366 |
| MILTEFOSINE [5mM]                      | 58066-85-6            | 0.2378 |
| RAFOXANIDE                             | 22662-39-1            | 0.2378 |
| MILNACIPRAN HYDROCHLORIDE              | 101152-94-7           | 0.2383 |
| CILNIDIPINE                            | 132203-70-4           | 0.2386 |
| DIHYDROJASMONIC ACID                   | 98674-52-3            | 0.2389 |
| CINNARAZINE                            | 298-57-7              | 0.2443 |
| DEXIBUPROFEN                           | 51146-56-6            | 0.2450 |
| FAMCICLOVIR                            | 104227-87-4           | 0.2467 |
| BATYL ALCOHOL                          | 544-62-7              | 0.2468 |
| CHLORALOSE                             | 15879-93-3            | 0.2474 |
| CYCLOSERINE (L)                        | 339-72-0              | 0.2480 |
| MESALAMINE                             | 89-57-6               | 0.2491 |
| INDOLE-2-CARBOXYLIC ACID               | 1477-50-5             | 0.2494 |
| DEHYDROACETIC ACID                     | 520-45-6              | 0.2496 |
| BIFONAZOLE                             | 60628-96-8            | 0.2498 |
| TINIDAZOLE                             | 19387-91-8            | 0.2503 |
| TERBUTALINE HEMISULFATE                | 23031-32-5            | 0.2526 |
| FENTHION                               | 55-38-9               | 0.2541 |
| WILFORLIDE A                           | 84104-71-2            | 0.2542 |
| PROCYCLIDINE HYDROCHLORIDE             | 1508-76-5, 77-37-2 [p | 0.2557 |

|                                                     |                        |        |
|-----------------------------------------------------|------------------------|--------|
| ACITRETIN                                           | 55079-83-9             | 0.2564 |
| ESTRAGOLE                                           | 140-67-0               | 0.2570 |
| ISOLIQURITIGENIN                                    | 961-29-5               | 0.2573 |
| BETAMETHASONE ACETATE                               | 987-24-6               | 0.2577 |
| LITHIUM CITRATE HYDRATE                             | 6080-58-6, 919-16-4 [  | 0.2603 |
| 5,7-DIHYDROXY-4-METHYLCOUMARIN                      |                        | 0.2608 |
| BENZYL ISOTHIOCYANATE                               | 622-78-6               | 0.2637 |
| ETHYL EVERNINATE                                    | 6110-36-7              | 0.2654 |
| APIGENIN DIMETHYL ETHER                             | 5728-44-9              | 0.2666 |
| SULFAMETHIZOLE                                      | 144-82-1               | 0.2677 |
| ALIZARIN                                            | 72-48-0                | 0.2680 |
| ECONAZOLE NITRATE                                   | 68797-31-9, 27220-47   | 0.2697 |
| TOLVAPTAN                                           | 150683-30-0            | 0.2732 |
| HOMIDIUM BROMIDE                                    | 1239-45-8              | 0.2747 |
| NORGESTREL                                          | 6533-00-2              | 0.2747 |
| SULFADOXINE                                         | 2447-57-6              | 0.2775 |
| XANTHURENIC ACID                                    | 59-00-7                | 0.2780 |
| METHYL PARABEN                                      | 99-76-3                | 0.2781 |
| MESOTRIONE                                          | 104206-82-8            | 0.2787 |
| L-PHENYLEPHRINE HYDROCHLORIDE                       | 61-76-7                | 0.2801 |
| BETA-AMINOALANINE HYDROCHLORIDE                     | 54897-59-5             | 0.2814 |
| 2',6'-DIMETHOXYACETOPHENONE                         | 51228                  | 0.2841 |
| PHLORIDZIN                                          | 60-81-1                | 0.2841 |
| HECOGENIN ACETATE                                   | 915-35-5               | 0.2843 |
| THEAFLAVIN MONOGALLATES                             |                        | 0.2845 |
| NADOLOL                                             | 42200-33-9             | 0.2856 |
| ALENDRONATE SODIUM TRIHYDRATE                       | 121268-17-5            | 0.2856 |
| BEZAFIBRATE                                         | 41859-67-0             | 0.2856 |
| 6,7-DICHLORO-3-HYDROXY-2-QUINOXALINECARBOXYLIC ACID |                        | 0.2871 |
| ARTEMETHER                                          | 71963-77-4             | 0.2888 |
| AGELASINE                                           |                        | 0.2889 |
| FTAXILIDE                                           | 19368-18-4             | 0.2913 |
| METHYCLOTHIAZIDE                                    | 135-07-9               | 0.2919 |
| MONOCROTALINE                                       | 315-22-0               | 0.2931 |
| PASINIAZID                                          | 2066-89-9              | 0.2932 |
| LIDOCAINE HYDROCHLORIDE                             | 6108-05-0, 73-78-9 [a  | 0.2957 |
| MEPRYLCAINE HYDROCHLORIDE                           | 956-03-6               | 0.2962 |
| CEFEPIME HYDROCHLORIDE                              | 123171-59-5            | 0.2969 |
| ROBUSTIC ACID                                       | 5307-59-5              | 0.2985 |
| NITENPYRAM                                          | 150824-47-8            | 0.2992 |
| ONDANSETRON HYDROCHLORIDE                           | 99614-02-5             | 0.3017 |
| FERULIC ACID                                        | 1135-24-6              | 0.3026 |
| SODIUM MONOFLUOROPHOSPHATE                          | 10163-15-2             | 0.3027 |
| RESERPINE                                           | 50-55-5                | 0.3031 |
| ALEURETIC ACID                                      | 533-87-9               | 0.3066 |
| MELEZITOSE                                          | 597-12-6               | 0.3066 |
| TRIAMCINOLONE                                       | 124-94-7               | 0.3066 |
| CLONIXIN                                            | 17737-65-4             | 0.3103 |
| THIOCTIC ACID                                       | 1077-24-7              | 0.3104 |
| CHLOROPHYLLIDE Cu COMPLEX Na SALT                   | 11006-34-1             | 0.3107 |
| ALLYLTHIOUREA                                       | 109-57-9               | 0.3112 |
| TOLAZOLINE HYDROCHLORIDE                            | 59-97-2, 59-98-3 [tola | 0.3145 |
| CAPECITABINE                                        | 154361-50-9            | 0.3147 |
| SORBITOL HEXAACETATE                                | 7208-47-1              | 0.3154 |
| TETROQUINONE                                        | 319-89-1               | 0.3162 |
| DIETHYLTOLUAMIDE                                    | 134-62-3               | 0.3165 |
| ZOMEPIRAC SODIUM                                    | 64092-49-5, 64092-48   | 0.3165 |
| FLEROXACIN                                          | 79660-72-3             | 0.3172 |
| 8-CYCLOPENTYLTHEOPHYLLINE                           | 35873-49-5             | 0.3179 |
| PHENYLALANINE (L) HYDROCHLORIDE                     | 63-91-2                | 0.3185 |
| ISOPROPAMIDE IODIDE                                 | 71-81-8, 7492-32-2 [is | 0.3197 |
| TRYPTOPHAN (L)                                      | 73-22-3                | 0.3219 |
| SALSALATE                                           | 552-94-3               | 0.3221 |
| PYRITHYLDIONE                                       | 77-04-3                | 0.3226 |
| LOBARIC ACID                                        | 522-53-2               | 0.3231 |
| MALATHION                                           | 121-75-5               | 0.3239 |
| HOMOPTEROCARPIN                                     | 606-91-7               | 0.3246 |
| TENYLIDONE                                          | 893-01-6               | 0.3249 |
| PIRFENIDONE                                         | 53179-13-8             | 0.3254 |
| HYMECHROME                                          | 90-33-5                | 0.3256 |
| QUINOLINIC ACID                                     | 89-00-9                | 0.3268 |
| QUEBRACHITOL                                        | 642-38-6               | 0.3270 |
| BACLOFEN HYDROCHLORIDE (+/-)                        | 70206-22-3             | 0.3274 |
| DICHLORISONE ACETATE                                | 79-61-8                | 0.3283 |

|                                                  |                       |        |
|--------------------------------------------------|-----------------------|--------|
| beta-CAROTENE [2mM]                              | 7235-40-7             | 0.3321 |
| OLSALAZINE SODIUM                                | 6054-98-4             | 0.3322 |
| SYNEPHRINE TARTRATE                              | 16589-24-5            | 0.3327 |
| AMBROXIDE (-)                                    | 6790-58-5             | 0.3337 |
| ACEDOBEN                                         | 556-08-1              | 0.3346 |
| SPECTINOMYCIN HYDROCHLORIDE                      | 22189-32-8, 21736-83  | 0.3352 |
| BUSSEIN                                          | 41060-14-4            | 0.3355 |
| ATOMOXETINE HYDROCHLORIDE                        | 82248-59-7            | 0.3357 |
| 3-ISOBUTYL-1-METHYLXANTHINE                      | 28822-58-4            | 0.3367 |
| KYNURENINE                                       | 343-65-7              | 0.3367 |
| CANDESARTAN                                      | 139481-59-7           | 0.3378 |
| ENILCONAZOLE SULFATE                             | 58594-72-2; 35554-44  | 0.3379 |
| FLUNIXIN MEGLUMINE                               | 42461-84-7            | 0.3382 |
| CEFMETAZOLE SODIUM                               | 56796-39-5            | 0.3407 |
| SULFAMETHOXAZOLE                                 | 723-46-6              | 0.3425 |
| ACETARSOL                                        | 97-44-9               | 0.3443 |
| TROPICAMIDE                                      | 1508-75-4             | 0.3454 |
| 6-AZA-2-THIOTHYMININE                            | 615-76-9              | 0.3458 |
| DIETHYLSTILBESTROL                               | 56-53-1               | 0.3462 |
| DAIDZEIN                                         | 486-66-8              | 0.3469 |
| OXONITINE                                        |                       | 0.3479 |
| DIOXYBENZONE                                     | 131-53-3              | 0.3490 |
| SULFANITRAN                                      | 122-16-7              | 0.3502 |
| DIMETHICONE (1%/ DMSO)                           | 9016-00-6             | 0.3507 |
| SMILAGENIN ACETATE                               |                       | 0.3528 |
| ACECAINIDE HYDROCHLORIDE                         | 34118-92-8, 32795-44  | 0.3542 |
| OCTINOXATE                                       | 5466-77-3             | 0.3568 |
| TRIACETYLRISVERATROL                             | 42206-94-0            | 0.3573 |
| INDOMETHACIN                                     | 53-86-1               | 0.3592 |
| IMIQUIMOD HYDROCHLORIDE                          | 99011-02-6 (base)     | 0.3595 |
| EMPAGLIFLOZIN                                    | 864070-44-0           | 0.3622 |
| LINACLOTIDE (1 mg/ml)                            | 851199-59-2           | 0.3633 |
| TENOFOVIR                                        | 206184-49-8 (acid)    | 0.3635 |
| LUMIRACOXIB                                      | 220991-20-8           | 0.3643 |
| MEROPENEM                                        | 96036-03-2            | 0.3644 |
| TAZOBACTAM                                       | 89786-04-9            | 0.3656 |
| HYDROCORTISONE                                   | 50-23-7               | 0.3659 |
| NITROMIDE                                        | 121-81-3              | 0.3660 |
| DIFFRACTAIC ACID                                 | 436-32-8              | 0.3669 |
| PHENELZINE SULFATE                               | 156-51-4, 51-71-8 [ph | 0.3675 |
| AMITRAZ                                          | 33089-61-1            | 0.3709 |
| ZALTOPROFEN                                      | 74711-43-6            | 0.3716 |
| FLURBIPROFEN                                     | 5104-49-4             | 0.3722 |
| ANETHOLE                                         | 4180-23-8             | 0.3730 |
| MIANSERIN HYDROCHLORIDE                          | 21535-47-7, 24219-97  | 0.3734 |
| DEXPANTHENOL                                     | 81-13-0               | 0.3736 |
| MOMETASONE FUROATE                               | 83919-23-7            | 0.3749 |
| 3-DEACETYLKHIVORIN                               |                       | 0.3779 |
| ZANAMIVIR                                        | 139110-80-8           | 0.3786 |
| AMIDOL DIHYDROCHLORIDE                           | 137-09-7              | 0.3792 |
| CEFORANIDE                                       | 60925-61-3            | 0.3810 |
| CINROMIDE                                        | 58473-74-8            | 0.3817 |
| METHYLPHENIDATE HYDROCHLORIDE                    | 298-59-9, 113-45-1(ba | 0.3826 |
| RETINYL PALMITATE                                | 79-81-2               | 0.3833 |
| CLOFIBRATE                                       | 637-07-0              | 0.3838 |
| ACETYL-L-LEUCINE                                 | 99-15-0               | 0.3840 |
| IRBESARTAN                                       | 138402-11-6           | 0.3840 |
| OXICONAZOLE NITRATE                              | 64211-46-7            | 0.3848 |
| GUAIFENESIN                                      | 93-14-1               | 0.3854 |
| ALLOPURINOL                                      | 315-30-0              | 0.3856 |
| CIMICIFUGOSIDE H1                                | 163046-73-9           | 0.3856 |
| TENATOPRAZOLE                                    | 113712-98-4           | 0.3871 |
| SCOPOLAMINE HYDROBROMIDE                         | 6533-68-2, 114-49-8 [ | 0.3879 |
| MERBROMIN                                        | 129-16-8              | 0.3881 |
| METHYLENE BLUE                                   | 7220-79-3             | 0.3881 |
| 1,2-EPOXY-3,18-DIDEOXY-3beta,18-DIACETOXYGEDUNIN |                       | 0.3889 |
| BENZYL BENZOATE                                  | 120-51-4              | 0.3894 |
| ADENOSINE                                        | 58-61-7               | 0.3896 |
| BENZOYLPAAS                                      | 13898-58-3            | 0.3923 |
| PIPEMIDIC ACID                                   | 51940-44-4 (acid)     | 0.3923 |
| RHODOCLADONIC ACID                               | 26984-15-6            | 0.3931 |
| ERYTHROMYCIN ETHYLSUCCINATE                      | 1264-62-6, 114-07-8 [ | 0.3940 |
| NALED                                            | 300-76-5              | 0.3966 |
| AMPYZINE SULFATE                                 | 7082-29-3             | 0.3983 |



|                                          |                       |        |
|------------------------------------------|-----------------------|--------|
| PIOGLITAZONE HYDROCHLORIDE               | 112529-15-4           | 0.3988 |
| SAFROLE                                  | 94-59-7               | 0.3990 |
| AMLEXANOX                                | 68302-57-8            | 0.3990 |
| PYRANTEL PAMOATE                         | 22204-24-6, 15686-83  | 0.3991 |
| HYDROXYZINE PAMOATE                      | 10246-75-0, 68-88-2 [ | 0.3992 |
| TRAZODONE HYDROCHLORIDE                  | 25332-39-2, 19794-93  | 0.3995 |
| DEXPROPRANOLOL HYDROCHLORIDE [R(+)]      | 13071-11-9            | 0.4010 |
| PRAVASTATIN SODIUM                       | 81131-70-6            | 0.4015 |
| 6,4'-DIMETHOXYFLAVONE                    | 54401-47-7            | 0.4017 |
| TOPIRAMATE                               | 97240-79-4            | 0.4025 |
| GUANIDINE CARBONATE                      | 593-85-1              | 0.4035 |
| BISOCTRIZOLE                             | 103597-45-1           | 0.4037 |
| ALLYLSIOTHIOCYANATE                      | 57-06-7               | 0.4057 |
| SUMATRIPTAN                              | 103628-46-2           | 0.4058 |
| ROSUVASTATIN CALCIUM                     | 147098-20-2           | 0.4096 |
| GENTAMICIN SULFATE                       | 1403-66-3             | 0.4110 |
| VALETHAMATE BROMIDE                      | 90-22-2               | 0.4133 |
| ACEGLUTAMIDE                             | 2490-97-3 (acid)      | 0.4151 |
| FAMOTIDINE                               | 76824-35-6            | 0.4155 |
| ADELMIDROL                               | 1675-66-7             | 0.4178 |
| OLTIPRAZ                                 | 64224-21-1            | 0.4194 |
| ACRISORCIN                               | 7527-91-5             | 0.4198 |
| PEONOL METHYL ETHER                      | 829-20-9              | 0.4201 |
| PRULIFLOXACIN                            | 123447-62-1           | 0.4218 |
| ACETOHYDROXAMIC ACID                     | 546-88-3              | 0.4222 |
| RIBAVIRIN                                | 36791-04-5            | 0.4222 |
| COLFORSIN                                | 66575-29-9            | 0.4254 |
| VIOMYCIN SULFATE                         | 37883-00-4            | 0.4265 |
| OZAGREL HYDROCHLORIDE                    | 82571-53-7            | 0.4271 |
| 7-METHOXYCHROMONE                        |                       | 0.4274 |
| SALICIN                                  | 138-52-3              | 0.4293 |
| CAFFEIC ACID                             | 331-39-5              | 0.4301 |
| 3-HYDROXYBENZYLHYDRAZINE DIHYDROCHLORIDE | 81012-99-9            | 0.4303 |
| CYCLOPENTOLATE HYDROCHLORIDE             | 5870-29-1, 512-15-2 [ | 0.4317 |
| OXYPHENCYCLIMINE HYDROCHLORIDE           | 125-52-0, 125-53-1 [o | 0.4326 |
| NEFAZODONE HYDROCHLORIDE                 | 82752-99-6            | 0.4337 |
| METHOXAMINE HYDROCHLORIDE                | 61-16-5, 390-28-3 [me | 0.4345 |
| SULFACARBAMIDE                           | 547-44-4              | 0.4353 |
| TRANDOLAPRIL                             | 87679-37-6            | 0.4355 |
| DIMPYLATE                                | 333-41-5              | 0.4356 |
| meta-CRESYL ACETATE                      | 122-46-3              | 0.4380 |
| MINAPRINE HYDROCHLORIDE                  | 25953-17-7            | 0.4380 |
| RONIDAZOLE                               | 7681-76-7             | 0.4380 |
| BECLAMIDE                                | 501-68-8              | 0.4421 |
| BUFEXAMAC                                | 2438-72-4             | 0.4430 |
| 2',4'-DIHYDROXY-4-METHOXYCHALCONE        | 81674-91-1            | 0.4437 |
| TYLOXAPOL                                | 25301-02-4            | 0.4439 |
| BRIMONIDINE                              | 59803-98-4            | 0.4442 |
| SALICYLIC ACID                           | 69-72-7               | 0.4445 |
| LEVAMISOLE HYDROCHLORIDE                 | 16595-80-5, 14769-73  | 0.4456 |
| ARSANILIC ACID                           | 98-50-0               | 0.4457 |
| ORNIDAZOLE                               | 16773-42-5            | 0.4466 |
| MOLSIDOMINE                              | 25717-80-0            | 0.4471 |
| GUANIDINE HYDROCHLORIDE                  | 50-01-1               | 0.4482 |
| SODIUM SALICYLATE                        | 54-21-7               | 0.4484 |
| ASPARTIC ACID (L)                        | 1825910               | 0.4489 |
| RUTILANTINONE                            | 21288-61-9            | 0.4495 |
| DEXFOSFOSERINE HYDROCHLORIDE             | 407-41-0              | 0.4506 |
| N-ACETYLPROLINE (dl)                     |                       | 0.4524 |
| CEFONICID SODIUM                         | 71420-79-6            | 0.4529 |
| ADRENALONE HYDROCHLORIDE                 | 62-13-5               | 0.4531 |
| AMANTADINE HYDROCHLORIDE                 | 665-66-7, 768-94-5 [a | 0.4534 |
| DIFLORASONE DIACETATE                    | 33564-31-7            | 0.4548 |
| TOLNAFTATE                               | 2398-96-1             | 0.4571 |
| IRETOL                                   | 487-71-8              | 0.4578 |
| RAMIPRIL                                 | 87333-19-5            | 0.4596 |
| ACETYLGUCOSAMINE                         |                       | 0.4605 |
| DIDANOSINE                               | 69655-05-6            | 0.4605 |
| PROPYLTHIOURACIL                         | 51-52-5               | 0.4605 |
| ETIDRONATE DISODIUM                      | 7414-83-7             | 0.4611 |
| DECAMETHONIUM BROMIDE                    | 541-22-0              | 0.4621 |
| SULFABENZAMIDE                           | 127-71-9              | 0.4621 |
| CEFOTAXIME SODIUM                        | 64485-93-4, 63527-52  | 0.4633 |
| EUPARIN                                  | 532-48-9              | 0.4642 |

|                                         |                         |        |
|-----------------------------------------|-------------------------|--------|
| ACEMETACIN                              | 53164-05-9              | 0.4642 |
| GLYCERIN                                | 56-81-5                 | 0.4650 |
| THIOPENTAL SODIUM                       | 71-73-8, 76-75-5 [thio] | 0.4650 |
| PREDNISOLONE SODIUM PHOSPHATE           | 125-02-0                | 0.4664 |
| ADENOSINE TRIPHOSPHATE DISODIUM         | 34369-07-8              | 0.4682 |
| SUPLATAST TOSYLATE                      | 94055-76-2              | 0.4682 |
| 16(17)-EPOXY-5-PREGNENOLONE             |                         | 0.4685 |
| IRIGENOL HEXAACETATE                    |                         | 0.4685 |
| ATROPINE OXIDE                          | 4438-22-6               | 0.4687 |
| GIBBERELIC ACID                         | 77-06-5                 | 0.4700 |
| SPIRAMYCIN                              | 8025-81-8               | 0.4722 |
| ISOPROTERENOL HYDROCHLORIDE             | 51-30-9                 | 0.4725 |
| TRIENTINE HYDROCHLORIDE                 | 38260-01-4              | 0.4728 |
| EUGENYL BENZOATE                        | 531-26-0                | 0.4731 |
| NALOXONE HYDROCHLORIDE                  | 357-08-4, 51481-60-8    | 0.4736 |
| CANDICIDIN                              | 1403-17-4               | 0.4740 |
| TEBUCONAZOLE                            | 107534-96-3             | 0.4742 |
| KUHLMANNIN                              |                         | 0.4749 |
| TUBOCURARINE CHLORIDE PENTAHYDRATE      | 6989-98-6, 57-94-3 [a]  | 0.4766 |
| BROXYQUINOLINE                          | 521-74-4                | 0.4772 |
| ITOPRIDE HYDROCHLORIDE                  | 122898-67-3             | 0.4779 |
| PAPAVERINE HYDROCHLORIDE                | 61-25-6, 58-74-2 [pap]  | 0.4782 |
| NAPROXEN                                | 22204-53-1              | 0.4783 |
| NITRENDIPINE                            | 84845-75-0              | 0.4783 |
| HYDROCORTISONE VALERATE                 | 57524-89-7              | 0.4815 |
| MEGLUMINE                               | 6284-40-8               | 0.4815 |
| alpha-CYANO-4-HYDROXYCINNAMIC ACID      | 28166-41-8              | 0.4822 |
| LANSOPRAZOLE                            | 103577-45-3             | 0.4822 |
| CARBARSONE                              | 121-59-5                | 0.4827 |
| 1-HYDROXY-3,6,7-TRIMETHOXY-2,8-DIPRENYL | 15404-76-9              | 0.4836 |
| SULFACHLORPYRIDAZINE                    | 80-32-0                 | 0.4836 |
| DIMETRIDAZOLE                           | 551-92-8                | 0.4861 |
| FURALTADONE                             | 139-91-3                | 0.4865 |
| LYSINE (L) HYDROCHLORIDE                | 657-27-2                | 0.4865 |
| SULFADIAZINE                            | 68-35-9                 | 0.4873 |
| MECLOFENAMATE SODIUM                    | 6385-02-0               | 0.4876 |
| 7,3'-DIHYDROXYFLAVONE                   | 108238-40-0             | 0.4877 |
| XYLOMETAZOLINE HYDROCHLORIDE            | 1218-35-5, 526-36-3 [x] | 0.4882 |
| METHYL 7-DESACETYLKHIVORINATE           |                         | 0.4892 |
| TERBINAFINE HYDROCHLORIDE               | 78628-80-5              | 0.4897 |
| LINAGLIPTIN                             | 668270-12-0             | 0.4905 |
| OCTOCRYLENE                             | 6197-30-4               | 0.4906 |
| LAMIVUDINE                              | 134678-17-4             | 0.4911 |
| BEMOTRIZINOL                            | 187393-00-6             | 0.4913 |
| PENTOLINIUM TARTRATE                    | 52-62-0, 144-44-5 [pe]  | 0.4914 |
| HETACILLIN POTASSIUM                    | 5321-32-4, 3511-16-8    | 0.4915 |
| MEPIVACAINE HYDROCHLORIDE               | 1722-62-9, 96-88-8 [m]  | 0.4920 |
| ALRESTATIN                              | 51411-04-2, 51876-97    | 0.4925 |
| AMINOETHOXYDIPHENYLBORANE               | 524-95-8                | 0.4934 |
| NEOMYCIN TRISULFATE                     | 1405-10-3, 1404-04-2    | 0.4941 |
| HYDROCORTISONE ACETATE                  | 50-03-3                 | 0.4949 |
| CYSTEINE HYDROCHLORIDE                  | 1880366                 | 0.4973 |
| AMINOHIPPURIC ACID                      | 61-78-9, 94-16-6 [ami]  | 0.5002 |
| PIPERAZINE                              | 110-85-0, 144-29-6 [a]  | 0.5018 |
| CHOLESTEROL                             | 57-88-5                 | 0.5038 |
| URSOCHOLANIC ACID                       | 546-18-9                | 0.5038 |
| DERACOXIB                               | 169590-41-4             | 0.5039 |
| CEFUROXIME AXETIL                       | 64544-07-6, 55268-75    | 0.5060 |
| HYDROCORTISONE PHOSPHATE TRIETHYLAMINE  | 3863-59-0 [cortisol 21] | 0.5060 |
| TAPENTADOL HYDROCHLORIDE                | 175591-23-8             | 0.5060 |
| BICALUTAMIDE                            | 90357-06-5              | 0.5080 |
| NIZATIDINE                              | 76963-41-2              | 0.5081 |
| RITANSERIN                              | 87051-43-2              | 0.5101 |
| LOMEFLOXACIN HYDROCHLORIDE              | 98079-51-7 (acid)       | 0.5102 |
| PILOCARPINE NITRATE                     | 148-72-1, 92-13-7 [pil] | 0.5109 |
| DICYCLOMINE HYDROCHLORIDE               | 67-92-5, 77-19-0 [dicy] | 0.5126 |
| DEXRAZOXANE                             | 24584-09-6              | 0.5142 |
| PHENINDIONE                             | 83-12-5                 | 0.5174 |
| DIAZOXIDE                               | 364-98-7                | 0.5191 |
| PROTIONAMIDE                            | 14222-60-7              | 0.5192 |
| HYDRASTININE HYDROCHLORIDE              | 4884-68-8, 6592-85-4    | 0.5194 |
|                                         |                         | 0.5214 |
| NOCODAZOLE                              | 31430-18-9              | 0.5228 |
| FIPEXIDE HYDROCHLORIDE                  | 34161-24-5              | 0.5251 |

|                                      |                       |        |
|--------------------------------------|-----------------------|--------|
| LEVOCARNITINE                        | 541-15-1              | 0.5274 |
| CHINIOFON                            | 8002-90-2             | 0.5276 |
| AVANAFIL                             | 330784-47-9           | 0.5280 |
| NIFUROXAZIDE                         | 965-52-6              | 0.5280 |
| QUINAPRIL                            | 85441-61-8            | 0.5295 |
| SALIDROSIDE                          | 10338-51-9            | 0.5298 |
| CHLORMIDAZOLE                        | 3689-76-7             | 0.5308 |
| SULFISOXAZOLE                        | 127-69-5              | 0.5361 |
| QUINAPRILAT                          | 85441-60-7            | 0.5376 |
| CEPHAPIRIN SODIUM                    | 24356-60-3, 21593-23  | 0.5409 |
| TOLTRAZURIL                          | 69004-03-1            | 0.5433 |
| DONEPEZIL HYDROCHLORIDE              | 142057-77-0           | 0.5452 |
| PREDNISON                            | 53-03-2               | 0.5452 |
| TROSPIMUM CHLORIDE                   | 10405-02-4            | 0.5461 |
| INDOPROFEN                           | 31842-01-0            | 0.5475 |
| PROCAINE HYDROCHLORIDE               | 51-05-8, 59-46-1 [pro | 0.5475 |
| LUPININE                             | 486-70-4              | 0.5493 |
| LINCOMYCIN HYDROCHLORIDE             | 7179-49-9             | 0.5505 |
| PRIMIDONE                            | 125-33-7              | 0.5505 |
| BROMHEXINE HYDROCHLORIDE             | 611-75-6, 3572-43-8 [ | 0.5539 |
| PIPERONAL                            | 120-57-0              | 0.5552 |
| NORETHINDRONE                        | 68-22-4               | 0.5554 |
| 6-AMINONICOTINAMIDE                  | 329-89-5              | 0.5557 |
| FENBUFEN                             | 36330-85-5            | 0.5561 |
| TAURINE                              | 107-35-7              | 0.5569 |
| HYDROXYTOLUIC ACID                   | 83-40-9               | 0.5590 |
| RUFLOXACIN HYDROCHLORIDE             | 106017-08-7, 101363-  | 0.5616 |
| CANRENOIC ACID, POTASSIUM SALT       | 2181-04-6, 4138-96-9  | 0.5631 |
| BROXALDINE                           | 3684-48-6             | 0.5635 |
| ACETRIAZOIC ACID                     | 85-36-9, 129-63-5 [ac | 0.5642 |
| CINCHONIDINE                         | 485-71-2              | 0.5652 |
| CRUSTECDYSONE                        | 5289-74-7             | 0.5670 |
| TICLOPIDINE HYDROCHLORIDE            | 53885-35-1            | 0.5670 |
| URAPIDIL HYDROCHLORIDE               | 34661-75-1            | 0.5679 |
| ENOXACIN                             | 74011-58-8            | 0.5694 |
| PHENYTOIN SODIUM                     | 630-93-3, 57-41-0 [ph | 0.5697 |
| SULPIRIDE (S [-])                    | 15676-16-1            | 0.5701 |
| VENLAFAXINE HYDROCHLORIDE            | 99300-78-4, 93413-69  | 0.5703 |
| TIOPRONIN                            | 19392                 | 0.5712 |
| BENSERAZIDE HYDROCHLORIDE            | 322-35-0              | 0.5715 |
| HYDROCORTISONE HEMISUCCINATE         | 83784-20-7, 2203-97-  | 0.5729 |
| BENZBROMARONE                        | 3562-84-3             | 0.5741 |
| PALMATINE                            | 3486-67-7             | 0.5755 |
| BENZOCLIDINE                         | 16852-81-6            | 0.5768 |
| 2,2'-AZO-bis-2-AMINOPROPANE          | 2997-92-4             | 0.5780 |
| IZALPININ                            | 480-14-4              | 0.5783 |
| SALSOLINE                            | 89-31-6               | 0.5793 |
| DROXYDOPA                            | 23651-95-8            | 0.5796 |
| 4-NAPHTHALIMIDOBUTYRIC ACID          | 88909-96-0            | 0.5798 |
| CEFTAZIDIME                          | 72558-82-8            | 0.5813 |
| RUFINAMIDE                           | 106308-44-5           | 0.5822 |
| CLINDAMYCIN PALMITATE HYDROCHLORIDE  | 25507-04-4            | 0.5829 |
| CYCLOSERINE (D)                      | 68-41-7               | 0.5831 |
| LISINAPRIL                           | 83915-83-7, 76547-98  | 0.5831 |
| OXYPHENONIUM BROMIDE                 | 50-10-2               | 0.5843 |
| AMIFOSTINE                           | 20537-88-6            | 0.5849 |
| ISORESERPINE                         | 482-85-9              | 0.5851 |
| CARPROFEN                            | 53716-49-7            | 0.5881 |
| DAVERIDINE                           | 5355-16-18            | 0.5888 |
| CHOLESTERYL HEMISUCCINATE            | 1510-21-0             | 0.5892 |
| QUININE                              | 130-95-0              | 0.5908 |
| 3-HYDROXYQUINOXALINE CARBOXYLIC ACID | 1204-75-7             | 0.5916 |
| NICOTINE BITARTRATE                  | 65-31-6               | 0.5921 |
| BUPROPION                            | 31677-93-7            | 0.5923 |
| AMINOSALICYLATE SODIUM               | 6018-19-5             | 0.5944 |
| AMILORIDE HYDROCHLORIDE              | 17440-83-4, 2016-88-  | 0.5966 |
| ARSENIC TRIOXIDE DIETHANOLAMINE SALT | 1327-53-3             | 0.6003 |
| PANTOPRAZOLE                         | 102625-70-7           | 0.6023 |
| SPARASSOL                            | 520-43-4              | 0.6023 |
| ALTHIAZIDE                           | 5588-16-9             | 0.6028 |
| THIAMPHENICOL                        | 15318-45-3            | 0.6032 |
| ASPARTAME                            | 22839-47-0            | 0.6057 |
| PEONIFLORIN                          | 23180-57-6            | 0.6099 |
| NOVOBIOCIN SODIUM                    | 1476-53-5, 303-81-1 [ | 0.6119 |

|                                         |                       |        |
|-----------------------------------------|-----------------------|--------|
| ARISTOLOCHIC ACID                       | 313-67-7              | 0.6129 |
| ETHISTERONE                             | 434-03-7              | 0.6129 |
| RITODRINE HYDROCHLORIDE                 | 23239-51-2, 26652-09  | 0.6130 |
| HALOTHANE                               | 151-67-7              | 0.6133 |
| FLUFENAMIC ACID                         | 530-78-9              | 0.6136 |
| BILIRUBIN                               | 635-65-4              | 0.6156 |
| METHYL 3-DEOXY-3beta-HYDROXYANGOLENSATE |                       | 0.6171 |
| ACETAMINOPHEN                           | 103-90-2              | 0.6213 |
| LETROZOLE                               | 112809-51-5           | 0.6227 |
| TUAMINOHEPTANE SULFATE                  | 6411-75-2, 123-82-0 [ | 0.6237 |
| PRAMIPEXOLE DIHYDROCHLORIDE             | 104632-26-0           | 0.6240 |
| KARANJIN                                | 521-88-0              | 0.6244 |
| alpha-TOCHOPHEROL                       | 59-02-9               | 0.6254 |
| ETHACRYNIC ACID                         | 58-54-8               | 0.6254 |
| PROPOXYCAINE HYDROCHLORIDE              | 550-83-4              | 0.6293 |
| SOTALOL HYDROCHLORIDE                   | 959-24-0              | 0.6294 |
| DICHLORVOS                              | 62-73-7               | 0.6296 |
| QUINALIZARIN                            | 81-61-8               | 0.6314 |
| DEHYDROCHOLATE SODIUM                   | 145-41-5              | 0.6323 |
| ORNITHINE HYDROCHLORIDE                 | 70-26-8               | 0.6323 |
| PARAMETHADIONE                          | 115-67-3              | 0.6323 |
| FOLIC ACID                              | 59-30-3               | 0.6352 |
| EDROPHONIUM CHLORIDE                    | 116-38-1, 312-48-1 [e | 0.6368 |
| LAPACHOL                                | 84-79-7               | 0.6371 |
| NIMODIPINE                              | 66085-59-4            | 0.6371 |
| KITASAMYCINS [A1 shown]                 | 1329-21-8             | 0.6383 |
| DIMESNA                                 | 16208-51-8            | 0.6405 |
| STAVUDINE                               | 3056-17-5             | 0.6411 |
| BUDESONIDE                              | 51333-22-3, 51372-29  | 0.6435 |
| IFOSFAMIDE                              | 3778-73-2             | 0.6437 |
| FLUORESCIEIN                            | 153954                | 0.6440 |
| PYRAZINAMIDE                            | 98-96-4               | 0.6456 |
| BENZONATATE                             | 104-31-4              | 0.6466 |
| GUAIACOL                                | 90-05-1               | 0.6466 |
| LEVOCETIRIZINE DIHYDROCHLORIDE          | 130018-77-8 (base)    | 0.6487 |
| PROCAINAMIDE HYDROCHLORIDE              | 614-39-1              | 0.6499 |
| LEAD ACETATE                            | 301-04-2              | 0.6515 |
| DIPLOSALSALATE                          | 530-75-6              | 0.6525 |
| SAXAGLIPTIN                             | 945667-22-1           | 0.6534 |
| CYANOCOBALAMIN                          | 68-19-9               | 0.6546 |
| METHICILLIN SODIUM                      | 7246-14-2, 132-92-3 [ | 0.6585 |
| ERYTHROSINE SODIUM                      | 16423-68-0            | 0.6586 |
| HEXESTROL                               | 84-16-2               | 0.6636 |
| NATAMYCIN                               | 7681-93-8             | 0.6636 |
| OXACILLIN SODIUM                        | 7240-38-2, 1173-88-2  | 0.6662 |
| OZAGREL HYDROCHLORIDE                   | 74003-18-2, 82571-53  | 0.6684 |
| KETANSERIN                              | 83846-83-7, 74050-98  | 0.6686 |
| KINETIN                                 | 525-79-1              | 0.6726 |
| AMINOETHYLISOTHIUREA DIHYDROBROMI       | 56-10-0               | 0.6756 |
| HISTAMINE DIHYDROCHLORIDE               | 51-45-6 [histamine]   | 0.6756 |
| DIFUCOL HEXAMETHYL ETHER                | 14262-07-8            | 0.6761 |
| CARMUSTINE                              | 154-93-8              | 0.6770 |
| STREPTOZOSIN                            | 18883-66-4            | 0.6773 |
| NARINGENIN                              | 480-41-1              | 0.6776 |
| ACESULFAME POTASSIUM                    | 55589-62-3            | 0.6788 |
| IODIPAMIDE                              | 606-17-7, 2618-26-0 [ | 0.6789 |
| ACADESINE                               | 2627-69-2             | 0.6802 |
| HYDROCHLOROTHIAZIDE                     | 58-93-5               | 0.6819 |
| DANAZOL                                 | 17230-88-5            | 0.6835 |
| BRINZOLAMIDE                            | 138890-62-7           | 0.6853 |
| DICLOFENAC SODIUM                       | 15307-79-6            | 0.6881 |
| TIGECYCLINE                             | 220620-09-7           | 0.6888 |
| ROTENONIC ACID, METHYL ETHER            |                       | 0.6891 |
| SPIRONOLACTONE                          | 52-01-7               | 0.6893 |
| METHSUXIMIDE                            | 77-41-8               | 0.6912 |
| FENOPROFEN                              | 31879-05-7            | 0.6930 |
| PENICILLAMINE ETHANOLAMINE SALT         | 52-67-5 (acid)        | 0.6934 |
| FENOTEROL HYDROBROMIDE                  | 16409                 | 0.6945 |
| BENZYL NICOTINATE                       | 94-44-0               | 0.6952 |
| DETOMIDINE HYDROCHLORIDE                | 90038-01-1            | 0.6952 |
| SILDENAFIL CITRATE                      | 139755-83-2           | 0.6953 |
| GEMFIBROZIL                             | 25812-30-0            | 0.6955 |
| FLUOROMETHOLONE                         | 426-13-1              | 0.6961 |
| OLMESARTAN MEDOXOMIL                    | 144689-63-4           | 0.6985 |

|                                        |                       |        |
|----------------------------------------|-----------------------|--------|
| COUMOPHOS                              | 56-72-4               | 0.6989 |
| ZOLPIDEM                               | 82626-48-0            | 0.7027 |
| ERYTHRITOL                             | 149-32-6              | 0.7030 |
| KANAMYCIN A SULFATE                    | 25389-94-0, 133-92-6  | 0.7033 |
| ANTIMONY POTASSIUM TARTRATE TRIHYDRATE | 28300-74-5            | 0.7034 |
| LEVOTHYROXINE SODIUM                   | 51-48-9               | 0.7047 |
| VALINE (L)                             | 72-18-4               | 0.7058 |
| CARYOPHYLLENE [t(-)]                   | 87-44-5               | 0.7060 |
| EFLORNITHINE HYDROCHLORIDE HYDRATE     | 96020-91-6            | 0.7080 |
| ANTIPYRINE                             | 60-80-0               | 0.7195 |
| CINCHONINE                             | 118-10-5              | 0.7195 |
| EDARAVONE                              | 89-25-8               | 0.7195 |
| VILAZODONE HYDROCHLORIDE               | 163521-12-8 (base)    | 0.7195 |
| AMINOPTERIN                            | 54-62-6, 58602-66-7 [ | 0.7235 |
| 6,2'-DIHYDROXYFLAVONE                  | 92439-20-8            | 0.7237 |
| YOHIMBINE HYDROCHLORIDE                | 65-19-0               | 0.7237 |
| CARBIDOPA                              | 28860-95-9            | 0.7241 |
| FLUTICASON PROPIONATE                  | 80474-14-2            | 0.7266 |
| NAFTIFINE HYDROCHLORIDE                | 65473-14-5            | 0.7279 |
| BETAZOLE HYDROCHLORIDE                 | 138-92-1              | 0.7284 |
| DIBEKACIN                              | 34493-98-6            | 0.7322 |
| CEFAMANDOLE NAFATE                     | 42540-40-9, 34444-01  | 0.7394 |
| RETORSINE                              | 480-54-6              | 0.7413 |
| CIPROFLOXACIN                          | 85721-33-1            | 0.7415 |
| BROMINDIONE                            | 1146-98-1             | 0.7419 |
| CLENBUTEROL HYDROCHLORIDE              | 21898-19-1            | 0.7429 |
| GLICLAZIDE                             | 21187-98-4            | 0.7479 |
| ANISODAMINE HYDROBROMIDE (+/-)         | 17659-49-3            | 0.7569 |
| OXIDOPAMINE HYDROCHLORIDE              | 28094-15-7            | 0.7579 |
| PHENFORMIN HYDROCHLORIDE               | 834-28-6              | 0.7608 |
| CYCLAMIC ACID                          | 100-88-9              | 0.7626 |
| UNDECYLENIC ACID                       | 112-38-9              | 0.7636 |
| TRICHLOROETHYLENE                      | 79-01-6               | 0.7645 |
| TETRACYCLINE HYDROCHLORIDE             | 64-75-5               | 0.7671 |
| SEMUSTINE                              | 13909-09-6            | 0.7677 |
| TORSEMIDE                              | 56211-40-6            | 0.7697 |
| APIXABAN                               | 503612-47-3           | 0.7705 |
| ETHAMIVAN                              | 304-84-7              | 0.7724 |
| SULFAMETER                             | 651-06-9              | 0.7739 |
| RACTOPAMINE HYDROCHLORIDE              | 90274-24-1            | 0.7743 |
| TIZANIDINE HYDROCHLORIDE               | 64461-82-1            | 0.7746 |
| FURAZOLIDONE                           | 67-45-8               | 0.7747 |
| ASIATICOSIDE                           | 16830-15-2            | 0.7748 |
| PANTHENOL (dl)                         | 16485-10-2            | 0.7758 |
| 2-HYDROXY-4-METHOXY-BENZOPHENONE       | 131-57-7              | 0.7777 |
| SEROTONIN HYDROCHLORIDE                | 50-67-9               | 0.7787 |
| CEFPYRAMIDE                            | 70797-11-4            | 0.7787 |
| CAPTAMINE                              | 108-02-1              | 0.7799 |
| DICUMAROL                              | 66-76-2 (acid)        | 0.7808 |
| CEFAMANDOLE SODIUM                     | 34444-01-4            | 0.7814 |
| SULFACETAMIDE                          | 144-80-9, 127-56-0 [a | 0.7826 |
| BIOTIN                                 | 58-85-5               | 0.7827 |
| CHOLECALCIFEROL                        | 67-97-0               | 0.7845 |
| NETILMICIN SULFATE                     | 56391-56-1            | 0.7850 |
| IDOXURIDINE                            | 54-42-2               | 0.7859 |
| INDINAVIR SULFATE                      | 0157810-81-6          | 0.7870 |
| CANDESARTAN CILEXTIL                   | 139481-59-7           | 0.7872 |
| TRILOSTANE                             | 13647-35-3            | 0.7899 |
| 3beta-HYDROXYDEOXODIHYDRODEOXYGEDUNIN  |                       | 0.7911 |
| AZILSARTAN MEDOXOMIL                   | 863031-24-7           | 0.7934 |
| ANASTROZOLE                            | 120511-73-1           | 0.7957 |
| LEVONORDEFRIN                          | 829-74-3, 18829-78-2  | 0.7969 |
| DIHYDROATRANORIN                       | 69168-12-3            | 0.7985 |
| PENICILLIN G POTASSIUM                 | 69-57-8, 61-33-6 [pen | 0.8025 |
| VORICONAZOLE                           | 137234-62-9           | 0.8025 |
| DORZOLAMIDE                            | 130693-82-2           | 0.8042 |
| METOLAZONE                             | 17560-51-9            | 0.8042 |
| TIMONACIC                              | 444-27-9              | 0.8049 |
| CINNAMIC ACID                          | 621-82-9              | 0.8066 |
| ATROPINE                               | 51-55-8               | 0.8068 |
| VERATRIC ACID                          | 93-07-2               | 0.8092 |
| SALICYLANILIDE                         | 87-17-2               | 0.8103 |
| DOCOSANOL                              | 661-19-8              | 0.8114 |
| CHOLIC ACID                            | 81-25-4               | 0.8121 |

|                                  |                       |        |
|----------------------------------|-----------------------|--------|
| FLUCYTOSINE                      | 2022-85-7             | 0.8126 |
| METACETAMOL                      | 621-42-1              | 0.8129 |
| NEOSTIGMINE BROMIDE              | 114-80-7              | 0.8138 |
| HYDROCORTISONE BUTYRATE          | 13609-67-1            | 0.8146 |
| RETINOL                          | 68-26-8               | 0.8158 |
| SERINE (L)                       | 56-45-1               | 0.8189 |
| AZELAIC ACID                     | 123-99-9              | 0.8200 |
| ACETYLCYSTEINE                   | 616-91-1              | 0.8203 |
| NISOLDIPINE                      | 63675-72-9            | 0.8247 |
| BETAMETHASONE SODIUM PHOSPHATE   | 151-73-5              | 0.8254 |
| ENALAPRIL MALEATE                | 76095-16-4, 75847-73  | 0.8261 |
| BERGENIN                         | 108032-11-7 (hydrate) | 0.8280 |
| AMOXICILLIN                      | 61336-70-7, 26787-78  | 0.8331 |
| PANTETHINE                       | 16816-67-4            | 0.8331 |
| TEGASEROD MALEATE                | 189188-57-6           | 0.8355 |
| EMTRICITABINE                    | 143491-57-0           | 0.8363 |
| ZALCITABINE                      | 7481-89-2             | 0.8383 |
| NORETHINDRONE ACETATE            | 51-98-9               | 0.8421 |
| CHLORAMPHENICOL SODIUM SUCCINATE | 982-57-0, 56-75-7 (ch | 0.8425 |
| PICONOL                          | 586-98-1              | 0.8430 |
| BROMOCRIPTINE MESYLATE           | 22260-51-1, 25614-03  | 0.8433 |
| SPARFLOXACIN                     | 110871-86-8           | 0.8433 |
| EFAROXAN HYDROCHLORIDE           | 89197-32-0            | 0.8453 |
| 4-HYDROXYINDOLE                  | 2380-94-1             | 0.8460 |
| PERSEITOL HEPTAACETATE           | 19147-10-5            | 0.8472 |
| LEUCODIN                         | 17946-87-1            | 0.8485 |
| SULFAMONOMETHOXINE               | 1220-83-3             | 0.8491 |
| CHAULMOGRIC ACID                 | 502-30-7              | 0.8511 |
| CHLORAMPHENICOL                  | 56-75-7               | 0.8532 |
| ROCURONIUM BROMIDE               | 119302-91-9           | 0.8534 |
| AZAPERONE                        | 1649-18-9             | 0.8546 |
| SULFAMETHAZINE                   | 57-68-1               | 0.8555 |
| PROCHLORPERAZINE EDISYLATE       | 1257-78-9, 84-02-6 [p | 0.8565 |
| NYSTATIN                         | 114-90-9              | 0.8626 |
| METARAMINOL BITARTRATE           | 33402-03-8            | 0.8627 |
| INOSINE                          | 58-63-9               | 0.8631 |
| MIGLITOL                         | 72432-03-2            | 0.8637 |
| DEHYDROCHOLIC ACID               | 81-23-2               | 0.8743 |
| CYCLOPHOSPHAMIDE                 | 6055-19-2             | 0.8746 |
| BUTENAFINE HYDROCHLORIDE         | 101827-46-7           | 0.8810 |
| LENALIDOMIDE                     | 191732-72-6           | 0.8829 |
| GALANTAMINE                      | 357-70-0, 1953-04-4 [ | 0.8842 |
| HEXYLENE GLYCOL                  | 107-41-5              | 0.8883 |
| BACITRACIN                       | 1405-87-4             | 0.8889 |
| EPLERENONE                       | 107724-20-9           | 0.8910 |
| RONNEL                           | 299-84-3              | 0.8918 |
| DESOXYMETASONE                   | 382-67-2              | 0.8918 |
| IRIGENIN TRIMETHYL ETHER         |                       | 0.8929 |
| AZTREONAM                        | 78110-38-0            | 0.8951 |
| NINHYDRIN                        | 485-47-2              | 0.8995 |
| CHOLINE CHLORIDE                 | 67-48-1, 62-49-7 [cho | 0.8996 |
| 4-PHENYLBUTYRIC ACID             | 1821-12-1, 1716-12-7  | 0.9016 |
| BURAMATE                         | 4663-83-6             | 0.9043 |
| RESVERATROL 4'-METHYL ETHER      | 33626-08-3            | 0.9074 |
| ARGININE HYDROCHLORIDE           | 1119-34-2             | 0.9166 |
| CYTIDINE TRIPHOSPHATE DISODIUM   | 65-47-4               | 0.9183 |
| CARNITINE (dl) HYDROCHLORIDE     | 461-06-3              | 0.9211 |
| PHENACEMIDE                      | 63-98-9               | 0.9247 |
| IOVERSOL                         | 8771-40-2             | 0.9248 |
| PHENOXYBENZAMINE HYDROCHLORIDE   | 63-92-3, 59-96-1 [phe | 0.9269 |
| FOMEPIZOLE HYDROCHLORIDE         | 56010-88-8            | 0.9283 |
| LEVOSULPIRIDE                    | 23672-07-3            | 0.9296 |
| CHLORQUINALDOL                   | 72-80-0               | 0.9306 |
| AMINOCAPROIC ACID HYDROCHLORIDE  | 4321-58-8             | 0.9319 |
| ISOETHARINE MESYLATE             | 7279-75-6             | 0.9333 |
| SUCCINYL-SULFATHIAZOLE           | 116-43-8              | 0.9346 |
| HYDRALAZINE HYDROCHLORIDE        | 86-54-4               | 0.9402 |
| OXANTEL PAMOATE                  | 68813-55-8            | 0.9402 |
| CANRENONE                        | 976-71-6              | 0.9438 |
| NITARSONE                        | 98-72-6               | 0.9468 |
| 4-METHYLDAPHNETIN                | 2107-77-9             | 0.9489 |
| ZINC UNDECYLENATE [4mM]          | 557-08-4              | 0.9534 |
| TENOXCAM                         | 59804-37-4            | 0.9539 |
| TROMETHAMINE                     | 77-86-1               | 0.9564 |

|                                       |                        |        |
|---------------------------------------|------------------------|--------|
| METOCLOPRAMIDE HYDROCHLORIDE          | 54143-57-6             | 0.9606 |
| SODIUM SUCCINATE                      | 110-15-6               | 0.9608 |
| GLYCOPYRROLATE                        | 596-51-0               | 0.9634 |
| GADODIAMIDE                           | 131410-48-5            | 0.9664 |
| GLAUCONIC ACID                        | 745-10-8               | 0.9691 |
| PRAZOSIN HYDROCHLORIDE                | 19237-84-4, 19216-56   | 0.9721 |
| ABIETIC ACID                          | 514-10-3               | 0.9734 |
| ACEBUTOLOL HYDROCHLORIDE              | 34381-68-5, 37517-30   | 0.9744 |
| THIOTEPA                              | 52-24-4                | 0.9754 |
| BETHANECHOL CHLORIDE                  | 590-63-6, 674-38-4 [b] | 0.9782 |
| beta-AMYRIN                           | 559-70-6               | 0.9787 |
| ACECLOFENAC                           | 89796-99-6             | 0.9848 |
| FLUROTHYL                             | 333-36-8               | 0.9871 |
| CHLORPHENIRAMINE MALEATE              | 113-92-8               | 0.9877 |
| LEVONORGESTREL                        | 797-63-7               | 0.9958 |
| ISONIAZID                             | 54-85-3                | 0.9960 |
| METAPROTERENOL                        | 586-06-1, 5874-97-5 [  | 0.9996 |
| LUMEFANTRINE                          | 82186-77-4             | 0.9999 |
| PRIMAQUINE PHOSPHATE                  | 63-45-6                | 1.0034 |
| GLUTATHIONE                           | 70-18-8                | 1.0058 |
| MECLOFENOXATE HYDROCHLORIDE           | 3685-84-5, 51-68-3(ba  | 1.0076 |
| CHLOROTHIAZIDE                        | 58-94-6                | 1.0089 |
| ESZOPICLONE                           | 138729-47-2            | 1.0258 |
| OLOPATADINE HYDROCHLORIDE             | 140462-76-6            | 1.0291 |
| CLOFIBRIC ACID                        | 882-09-7               | 1.0306 |
| CLEROCIDIN                            |                        | 1.0314 |
| CORTISONE ACETATE                     | 50-04-4, 53-06-5 [cort | 1.0338 |
| VALACYCLOVIR HYDROCHLORIDE            | 124832-27-5            | 1.0342 |
| ISOTRETINON                           | 4759-48-2              | 1.0353 |
| BICUCULLINE(-) METHIODIDE             | 55950-07-7             | 1.0361 |
| METHACYCLINE HYDROCHLORIDE            | 3963-95-9, 914-00-1 [  | 1.0390 |
| FEBUXOSTAT                            | 144060-53-7            | 1.0396 |
| FOSFOMYCIN CALCIUM                    | 26472-47-9, 23112-90   | 1.0402 |
| LOMUSTINE                             | 13010-47-4             | 1.0483 |
| BENURESTAT                            | 38274-54-3             | 1.0493 |
| BALSALAZIDE DISODIUM                  | 150399-21-6            | 1.0495 |
| LAPATINIB                             | 231277-92-2            | 1.0540 |
| NITROFURAZONE                         | 59-87-0                | 1.0549 |
| PRASTERONE ACETATE                    | 853-23-6               | 1.0563 |
| ARTEMOTIL                             | 75887-54-6             | 1.0580 |
| FEXOFENADINE HYDROCHLORIDE            | 138452-21-8            | 1.0584 |
| FLUDROCORTISONE ACETATE               | 514-36-3, 127-31-1 [fl | 1.0621 |
| KETOPROFEN                            | 22071-15-4             | 1.0626 |
| PIROCTONE OLAMINE                     | 68890-66-4             | 1.0650 |
| ADRENOSTERONE                         | 382-45-6               | 1.0666 |
| PRAZIQUANTEL                          | 55268-74-1             | 1.0675 |
| COLESEVALAM HYDROCHLORIDE (high mol v | 182815-44-7            | 1.0712 |
| ETHANOLAMINE OLEATE                   | 136185                 | 1.0729 |
| TICARCILLIN DISODIUM                  | 4697-14-7              | 1.0753 |
| PANCURONIUM BROMIDE                   | 15500-66-0             | 1.0773 |
| CHLORPROPAMIDE                        | 94-20-2                | 1.0791 |
| TANSHINONE IIA SULFONATE SODIUM       |                        | 1.0815 |
| NEVIRAPINE                            | 129618-40-2            | 1.0820 |
| NORFLOXACIN                           | 70458-96-7             | 1.0831 |
| ACARBOSE                              | 56180-94-0             | 1.0844 |
| PICROTOXININ                          | 17617-45-7             | 1.0856 |
| ZALEPLON                              | 151319-34-5            | 1.0905 |
| DENATONIUM BENZOATE                   | 3734-33-6              | 1.0921 |
| AURAPTENE                             | 495-02-3               | 1.0939 |
| DIFLOXACIN HYDROCHLORIDE              | 91296-86-5             | 1.1010 |
| LOXAPINE SUCCINATE                    | 27833-64-3, 1977-10-   | 1.1020 |
| MILRINONE                             | 78415-72-2             | 1.1044 |
| LEVOMENTHOL                           | 2216-51-5              | 1.1080 |
| FUROSEMIDE                            | 54-31-9                | 1.1094 |
| CEFDINIR                              | 91832-40-5             | 1.1099 |
| TIOGUANINE                            | 154-42-7               | 1.1104 |
| DEXLANSOPRAZOLE                       | 138530-94-6            | 1.1114 |
| PROGLUMIDE SODIUM                     | 6620-60-6              | 1.1123 |
| PSEUDOEPHEDRINE HYDROCHLORIDE         | 345-78-8               | 1.1193 |
| CHLORMEZANONE                         | 80-77-3                | 1.1234 |
| THIOGUANINE                           | 154-42-7, 5580-03-0 [  | 1.1234 |
| FAMPRIDINE                            | 504-24-5               | 1.1256 |
| CITRONELLAL (R+)                      | 2385-77-5              | 1.1275 |
| IDRAMANTONE                           | 20098-14-0             | 1.1300 |

|                                   |                       |        |
|-----------------------------------|-----------------------|--------|
| CALCEIN                           | 1461-15-0             | 1.1302 |
| 3-OXOURSAN(28-13)OLIDE            |                       | 1.1347 |
| ZOLMITRIPTAN                      | 139264-17-8           | 1.1347 |
| SULFAMETHOXYPYRIDAZINE            | 80-35-3               | 1.1350 |
| IVABRADINE HYDROCHLORIDE          | 148849-67-6           | 1.1388 |
| 7,8-DIMETHOXYFLAVONE              |                       | 1.1441 |
| HEPARIN SODIUM                    | 2608411               | 1.1507 |
| RIBOFLAVIN 5-PHOSPHATE SODIUM     | 130-40-5              | 1.1534 |
| MOXIFLOXACIN HYDROCHLORIDE        | 186826-86-8           | 1.1551 |
| TEMAZEPAM                         | 846-50-4              | 1.1639 |
| NADIDE                            | 53-84-9               | 1.1648 |
| CARTEOLOL HYDROCHLORIDE           | 51781-21-6            | 1.1708 |
| D-SERINE                          | 312-84-5              | 1.1717 |
| MEXILETINE HYDROCHLORIDE          | 5370-01-4, 31828-71-  | 1.1743 |
| ETHAMBUTOL HYDROCHLORIDE          | 1070-11-7, 74-55-5 [e | 1.1855 |
| DISOPYRAMIDE PHOSPHATE            | 22059-60-5            | 1.1881 |
| CALCIUM CHLORIDE                  | 10043-52-4            | 1.1908 |
| DIMERCAPROL                       | 59-52-9               | 1.1909 |
| COLISTIMETHATE SODIUM             | 8068-28-8, 21362-08-  | 1.1959 |
| SODIUM PHENYL BUTYRATE            | 1716-12-7             | 1.1959 |
| TEMOZOLOMIDE                      | 85622-93-1            | 1.1959 |
| ARACHIDONIC ACID                  | 506-32-1              | 1.2003 |
| FUMARPROTOCETRARIC ACID           | 489-50-9              | 1.2004 |
| CLINDAMYCIN HYDROCHLORIDE         | 21462-39-5, 58207-19  | 1.2021 |
| CLIOQUINOL                        | 130-26-7              | 1.2039 |
| DIBUTYL SUBERATE                  | 16090-77-0            | 1.2052 |
| MESNA                             | 19767-45-4, 3375-50-  | 1.2086 |
| 4'-METHOXYCHALCONE                | 22966-19-4            | 1.2101 |
| SELEGILINE HYDROCHLORIDE          | 14611-52-0            | 1.2127 |
| RETINYL ACETATE                   | 127-47-9              | 1.2133 |
| PAMABROM                          | 606-04-2              | 1.2162 |
| AMCINONIDE                        | 51022-69-6            | 1.2193 |
| MINOCYCLINE HYDROCHLORIDE         | 13614-98-7, 10118-90  | 1.2195 |
| ALOGLIPTIN BENZOATE               | 850649-62-6           | 1.2211 |
| ASPIRIN                           | 50-78-2               | 1.2237 |
| NIACIN                            | 59-67-6               | 1.2310 |
| HOMATROPINE METHYLBROMIDE         | 80-49-9, 87-00-3 [hon | 1.2330 |
| FLUOCINONIDE                      | 356-12-7              | 1.2393 |
| SUVOREXANT                        | 1030377-33-3          | 1.2403 |
| DESOXYCORTICOSTERONE ACETATE      | 56-47-3               | 1.2445 |
| FLORFENICOL                       | 76639-94-6            | 1.2490 |
| SAPPANONE A DIMETHYL ETHER        |                       | 1.2533 |
| PENICILLIN V POTASSIUM            | 132-98-9, 87-08-1 [pe | 1.2565 |
| OLEIC ACID                        | 112-80-1              | 1.2574 |
| DEFERASIROX                       | 0201530-41-8          | 1.2643 |
| ANTHRALIN                         | 480-22-8, 1143-38-0   | 1.2686 |
| FUSIDIC ACID                      | 1859240               | 1.2700 |
| CLEMASTINE FUMARATE               | 14976-57-9, 15686-51  | 1.2715 |
| EDOXUDINE                         | 15176-29-1            | 1.2800 |
| CIMETIDINE                        | 51481-61-9            | 1.2801 |
| PIROXICAM                         | 36322-90-4            | 1.2851 |
| AMINOLEVULINIC ACID HYDROCHLORIDE | 1297222               | 1.2891 |
| GLIMEPIRIDE                       | 93479-97-1            | 1.2950 |
| OCTODRINE                         | 543-82-8              | 1.2966 |
| ARTEMISININ                       | 63968-64-9            | 1.2991 |
| PHENOTHRLIN                       | 26002-80-2            | 1.3253 |
| CYSTEAMINE HYDROCHLORIDE          | 60-23-1               | 1.3326 |
| CHLOROCRESOL                      | 59-50-7               | 1.3379 |
| ROBENIDINE HYDROCHLORIDE          | 25875-50-7            | 1.3407 |
| CHLOROACETOXYQUINOLINE            | 10173-02-1            | 1.3424 |
| BUTYLATED HYDROXYTOLUENE          | 128-37-0              | 1.3457 |
| ALBUTEROL                         | 18559-94-9            | 1.3495 |
| AMIKACIN HYDRATE                  | 37517-28-5            | 1.3550 |
| AMPROLIUM                         | 121-25-5              | 1.3610 |
| DEXAMETHASONE ACETATE             | 55812-90-3, 1177-87-  | 1.3651 |
| DEHYDRODEGUELIN                   | 3466-23-7             | 1.3661 |
| 5-CHLOROINDOLE-2-CARBOXYLIC ACID  | 10517-21-2            | 1.3681 |
| VALGANCICLOVIR HYDROCHLORIDE      | 175865-59-5           | 1.3681 |
| ETHYL PARABEN                     | 120-47-8              | 1.3728 |
| MOXALACTAM DISODIUM               | 64953-12-4            | 1.3747 |
| MUPIROCIN                         | 12650-69-0            | 1.3753 |
| QUINIDINE GLUCONATE               | 7054-25-3             | 1.3768 |
| ADENOSINE 5-MONOPHOSPHATE         | 61-19-8               | 1.3806 |
| ISOSORBIDE DINITRATE              | 87-33-2               | 1.3911 |



|                                                |                        |        |
|------------------------------------------------|------------------------|--------|
| CINOXACIN                                      | 28657-80-9             | 1.3939 |
| ANISINDIONE                                    | 117-37-3               | 1.3992 |
| 1S,2R-PHENYLPROPANOLAMINE HYDROCHL             | 154-41-6               | 1.3999 |
| DOXAPRAM HYDROCHLORIDE                         | 7081-53-0              | 1.4024 |
| ONONETIN                                       | 487-49-0               | 1.4058 |
| ROSIGLITAZONE MALEATE                          | 122320-73-4            | 1.4147 |
| CHLOROGUANIDE HYDROCHLORIDE                    | 637-32-1               | 1.4291 |
| MOROXYDINE HYDROCHLORIDE                       | 3731-59-7              | 1.4306 |
| METHSCOPOLAMINE BROMIDE                        | 155-41-9               | 1.4335 |
| CEFOXITIN SODIUM                               | 66309-69-1, 61622-34   | 1.4340 |
| OLEANOLIC ACID ACETATE                         | 4339-72-4              | 1.4347 |
| SIROLIMUS                                      | 53123-88-9             | 1.4352 |
| BETAINE HYDROCHLORIDE                          | 590-46-5               | 1.4360 |
| AKLOMIDE                                       | 3011-89-0              | 1.4421 |
| CANAGLIFLOZIN                                  | 928672-86-0            | 1.4433 |
| BENZYLHYDRAZINE HYDROCHLORIDE                  | 3287-99-8; 100-46-9(t  | 1.4448 |
| ERYTHROMYCIN                                   | 114-07-8               | 1.4448 |
| ROFLUMILAST                                    | 162401-32-3            | 1.4490 |
| PIPOBROMAN                                     | 54-91-1                | 1.4571 |
| PROPANTHELIN BROMIDE                           | 50-34-0, 298-50-0 [pr  | 1.4599 |
| PINDOLOL                                       | 13523-86-9             | 1.4626 |
| PENCICLOVIR                                    | 39809-25-1             | 1.4653 |
| CLOBETASOL PROPIONATE                          | 25122-46-7, 25122-41   | 1.4737 |
| 3-BENZYLOXY-4,4-BISNOR-8,11,13-PODOCARPATRIENE |                        | 1.4769 |
| DEFEROXAMINE MESYLATE                          | 138-14-7, 70-51-9 [de  | 1.4902 |
| PEFLOXACIN MESYLATE                            | 149676-40-4            | 1.4931 |
| BITHIONOL                                      | 97-18-7                | 1.4936 |
| 4-ACETOXYPHENOL                                | 3233-32-7              | 1.4988 |
| 7,4'-DIMETHOXYISOFLAVONE                       |                        | 1.5025 |
| RIVAROXABAN                                    | 366789-02-8            | 1.5025 |
| RIFAPENTINE                                    | 61379-65-5             | 1.5104 |
| DIOSGENIN                                      | 512-04-9               | 1.5128 |
| OMEPRAZOLE                                     | 73590-58-6             | 1.5147 |
| IOHEXOL                                        | 66108-95-0             | 1.5205 |
| LIOTHYRONINE (L- isomer) SODIUM                | 55-06-1, 6893-02-3 [li | 1.5245 |
| NOREPINEPHRINE TARTRATE                        | 69815-49-2, 51-41-2 [  | 1.5434 |
| AZATHIOPRINE                                   | 446-86-6               | 1.5479 |
| BECLOMETHASONE DIPROPIONATE                    | 5534-09-8, 4419-39-0   | 1.5654 |
| OXFENDAZOLE                                    | 53716-50-0             | 1.5738 |
| ESCULIN MONOHYDRATE                            | 531-75-9               | 1.5773 |
| HYDRASTINE (1R, 9S)                            | 118-08-1               | 1.5773 |
| PENTOXIFYLLINE                                 | 1677687                | 1.5899 |
| ACYCLOVIR                                      | 59277-89-3             | 1.6074 |
| MERCAPTOPYRINE                                 | 6112-76-1, 50-44-2 [a  | 1.6134 |
| AVOBENZONE                                     | 70356-09-1             | 1.6158 |
| 7,8-DIHYDROXYFLAVONE                           | 38183-03-8             | 1.6189 |
| GANCICLOVIR HYDRATE                            | 82410-32-0             | 1.6249 |
| BITOSCANATE                                    | 4044-65-9              | 1.6281 |
| PRASUGREL                                      | 150322-43-3            | 1.6429 |
| MORANTEL CITRATE                               | 26155-31-7, 20574-50   | 1.6432 |
| KETOROLAC TROMETHAMINE                         | 74103-07-4             | 1.6443 |
| ESTROPIPATE                                    | 7280-37-7              | 1.6526 |
| NICOPHOLINE                                    | 492-85-3               | 1.6771 |
| CLOXACILLIN SODIUM                             | 7081-44-9, 642-78-4 [  | 1.6785 |
| ZAPRINAST                                      | 37762-06-4             | 1.6789 |
| PIDOTIMOD                                      | 121808-62-6            | 1.6846 |
| OXYQUINOLINE HEMISULFATE                       | 134-31-6               | 1.6860 |
| CHENODIOL                                      | 474-25-9               | 1.7002 |
| ANIRACETAM                                     | 72432-10-1             | 1.7111 |
| PROTAMINE SULFATE [10mg/ ml]                   | 53597-25-4             | 1.7175 |
| NIFEDIPINE                                     | 21829-25-4             | 1.7178 |
| TRICAIN MESYLATE                               | 886-86-2               | 1.7307 |
| ESTRADIOL VALERATE                             | 979-32-8               | 1.7328 |
| LORNOXICAM                                     | 70374-39-9             | 1.7730 |
| DIFLUNISAL                                     | 22494-42-4             | 1.8081 |
| TESTOSTERONE                                   | 58-22-0                | 1.8097 |
| EDITOL                                         | 102-60-3               | 1.8372 |
| FELBINAC                                       | 5728-52-9              | 1.8436 |
| TRICLABENDAZOLE                                | 68786-66-3             | 1.8443 |
| 2,4-DINITROPHENOL                              | 51-28-5                | 1.8462 |
| ZILEUTON                                       | 111406-87-2            | 1.8514 |
| RUTIN                                          | 153-18-4               | 1.8606 |
| TANNIC ACID                                    | 1401-55-4              | 1.8687 |
| RESVERATROL                                    | 501-36-0               | 1.8741 |

|                                     |                       |        |
|-------------------------------------|-----------------------|--------|
| NAFCILLIN SODIUM                    | 7177-50-6, 985-16-0 [ | 1.8795 |
| SPERMIDINE TRIHYDROCHLORIDE         | 334-50-9              | 1.8933 |
| CEFIXIME                            | 79350-37-1            | 1.9288 |
| BENZTHIAZIDE                        | 91-33-8               | 1.9349 |
| SACCHARIN                           | 81-07-2               | 1.9363 |
| 5alpha-CHOLESTANOL                  | 80-97-7               | 1.9409 |
| IRINOTECAN HYDROCHLORIDE            | 136572-09-3           | 1.9426 |
| ACAMPROSATE CALCIUM                 | 77337-73-6            | 1.9655 |
| DEMECLOCYCLINE HYDROCHLORIDE        | 127-33-3              | 1.9833 |
| CRESOL                              | 1319-77-3             | 1.9847 |
| ATAZANAVIR SULFATE                  | 229975-97-7           | 1.9908 |
| SODIUM OXYBATE                      | 502-85-2              | 2.0046 |
| DIMETHADIONE                        | 695-53-4              | 2.0232 |
| HYDROFLUMETHIAZIDE                  | 135-09-1              | 2.0361 |
| MEDROXYPROGESTERONE ACETATE         | 71-58-9, 520-85-4     | 2.0538 |
| ISOVALERAMIDE                       | 541-46-8              | 2.0657 |
| MELPHALAN                           | 148-82-3              | 2.0963 |
| ETHINYL ESTRADIOL                   | 57-63-6               | 2.0992 |
| CLOTRIMAZOLE                        | 23593-75-1            | 2.1346 |
| LOFEXIDINE HYDROCHLORIDE            | 21498-08-8            | 2.1486 |
| INDAPAMIDE                          | 26807-65-8            | 2.1659 |
| BENZOXIQUINE                        | 86-75-9               | 2.1694 |
| OXYTETRACYCLINE                     | 6153-64-6, 79-57-2 [a | 2.1717 |
| DOXYCYCLINE HYDROCHLORIDE           | 17086-28-1, 564-25-0  | 2.2122 |
| GRISEOFULVIN                        | 126-07-8              | 2.2317 |
| GEMCITABINE HYDROCHLORIDE           | 122111-03-9           | 2.2333 |
| CLOFARABINE                         | 123318-82-1           | 2.2441 |
| MONOBENZONE                         | 103-16-2              | 2.2531 |
| METHENAMINE                         | 100-97-0              | 2.2625 |
| PROBENECID                          | 57-66-9               | 2.2949 |
| PERMETHRIN                          | 52341-33-0, 52645-53  | 2.3427 |
| SODIUM NITROPRUSSIDE DIHYDRATE      | 13755-38-9            | 2.3479 |
| ALBENDAZOLE                         | 54965-21-8            | 2.3561 |
| PTEROSTILBENE                       | 537-42-8              | 2.3701 |
| IBUPROFEN                           | 15687-27-1            | 2.4032 |
| NITROXOLINE                         | 4008-48-4             | 2.4788 |
| TEPOXALIN                           | 103475-41-8           | 2.4832 |
| DECOQUINATE [5mM]                   | 18507-89-6            | 2.4968 |
| THIAMINE HYDROCHLORIDE              | 67-03-8               | 2.5008 |
| ESTRADIOL CYPIONATE                 | 313-06-4              | 2.5879 |
| DEOXSAPPANONE B 7,4'-DIMETHYL ETHER |                       | 2.6186 |
| MECHLORETHAMINE                     | 55-86-7, 51-75-2      | 2.6418 |
| SULFAQUINOXALINE SODIUM             | 59-40-5               | 2.7204 |
| PEMETREXED                          | 137281-23-3           | 2.9210 |
| OXALIPLATIN                         | 61825-94-3            | 3.0127 |
| VIDARABINE                          | 24356-66-9            | 3.1369 |
| HYDROQUINONE                        | 123-31-9              | 3.1796 |
| HYDROXYUREA                         | 127-07-1              | 3.4325 |
| PHENSUCCIMIDE                       | 86-34-0               | 3.4977 |
| ANCITABINE HYDROCHLORIDE            | 10212-25-6            | 3.6064 |
| CLOXYQUIN                           | 130-16-5              | 3.6139 |
| ADEFOVIR DIPIVOXYL                  | 142340-99-6           | 3.7980 |
| TRIFLURIDINE                        | 70-00-8               | 3.9052 |
| BLEOMYCIN                           | 9041-93-4             | 4.0530 |
| MEQUINOL                            | 150-76-5              | 4.0571 |
| EPIRUBICIN HYDROCHLORIDE            | 56390-09-1            | 4.1132 |
| FLUBENDAZOLE                        | 31430-15-6            | 4.1142 |
| FENBENDAZOLE                        | 43210-67-9            | 4.1475 |
| ENTECAVIR MONOHYDRATE               | 209216-23-9           | 4.1765 |
| METHOTREXATE HYDRATE                | 59-05-2               |        |
| ROTENONE                            | 83-79-4               |        |
| PODOPHYLLIN ACETATE                 | 1180-34-3             |        |
| RILUZOLE                            | 1744-22-5             |        |
| DIHYDROROTENONE                     | 6659-45-6             |        |
| DUARTIN, DIMETHYL ETHER             |                       |        |
| MITOMYCIN                           | 50-07-7               |        |
| FLUDARABINE PHOSPHATE               | 75607-67-9            |        |
| NOSCAPINE HYDROCHLORIDE             | 912-60-7, 128-62-1    |        |
| PICROPODOPHYLLIN ACETATE            |                       |        |
| IDAZOXAN HYDROCHLORIDE              | 79944-58-4            |        |
| CARBIMAZOLE                         | 22232-54-8            |        |
| VINCRIStINE SULFATE                 | 2068-78-2             |        |
| 4'-DEMETHYLEPICROPODOPHYLLOTOXIN    |                       |        |
| CICLOPIROX OLAMINE                  | 41621-49-2            |        |

|                                       |                                 |  |
|---------------------------------------|---------------------------------|--|
| OXIBENDAZOLE                          | 20559-55-1                      |  |
| PICROPODOPHYLLIN                      | 477-47-4                        |  |
| MEBENDAZOLE                           | 31431-39-7                      |  |
| CABAZITAXEL                           | 183133-96-2                     |  |
| COLCHICINE                            | 64-86-8                         |  |
| RHETSININE                            | 526-43-2                        |  |
| CYTARABINE                            | 147-94-4                        |  |
| 4-METHOXY-4'-HYDROXY-DALBERGIONE      |                                 |  |
| 1,4-NAPHTHOQUINONE                    | 130-15-4                        |  |
| 18-AMINOABIETA-8,11,13-TRIENE SULFATE |                                 |  |
| 2,5-DI-t-BUTYL-4-HYDROXYANISOLE       | 1991-52-2                       |  |
| 4-HYDROXYCHALCONE                     | 20426-12-4                      |  |
| 7-DESACETOXY-6,7-DEHYDROGEDUNIN       |                                 |  |
| ABAMECTIN (avermectin B1a shown)      | 71751-41-2                      |  |
| ACETOXOLONE                           |                                 |  |
| ACRIFLAVINIUM HYDROCHLORIDE           | 8063-24-9                       |  |
| ADAPALENE                             | 106685-40-9                     |  |
| AMINACRINE                            | 90-45-9, 134-50-9 [aminacrine h |  |
| AMLODIPINE BESYLATE                   | 111470-99-6                     |  |
| AMOXAPINE                             | 14028-44-5                      |  |
| AMSACRINE                             | 51264-14-3                      |  |
| ANDROGRAPHOLIDE                       | 5508-58-7                       |  |
| ANTHOTHECOL                           | 10410-83-0                      |  |
| ANTHRACENE-1,4-DIONE                  | 635-12-1                        |  |
| AVERMECTIN A1a                        | 71827-03-7                      |  |
| AZACITIDINE                           | 320-67-2                        |  |
| BENZALKONIUM CHLORIDE HYDRATE         | 8001-54-5                       |  |
| BENZYDAMINE HYDROCHLORIDE             | 132-69-4                        |  |
| BRONOPOL                              | 52-51-7                         |  |
| CAPTAN                                | 133-06-2                        |  |
| CEDRELONE                             | 1254-85-9                       |  |
| CELASTROL                             | 34157-83-0                      |  |
| CETALKONIUM CHLORIDE                  | 122-18-9                        |  |
| CETRIMONIUM BROMIDE                   | 57-09-0, 6899-10-1 [cetrimoniu  |  |
| CETYLPYRIDINIUM CHLORIDE              | 6004-24-6, 123-03-5 [anhydrous  |  |
| CHLOROQUINE DIPHOSPHATE               | 50-63-5                         |  |
| CHLOROTHALONIL                        | 1897-45-6                       |  |
| CHLORPROMAZINE HYDROCHLORIDE          | 69-09-0                         |  |
| CHRYSENEQUINONE                       | 100900-16-1                     |  |
| CLOMIPRAMINE HYDROCHLORIDE            | 17321-77-6, 303-49-1 [clomipra  |  |
| CYCLOHEXIMIDE                         | 66-81-9                         |  |
| DACTINOMYCIN                          | 50-76-0                         |  |
| DALBERGIONE                           | 28396-75-0                      |  |
| DAUNORUBICIN HYDROCHLORIDE            | 20830-81-3                      |  |
| DESLORATIDINE                         | 100643-71-8                     |  |
| DICHLOROPHEN                          | 97-23-4                         |  |
| DIHYDROCELASTRYL DIACETATE            |                                 |  |
| DIMETHYL GAMBOGINATE                  |                                 |  |
| DISULFIRAM                            | 97-77-8                         |  |
| DOCETAXEL                             | 148408-66-6                     |  |
| DOXORUBICIN                           | 23214-92-8                      |  |
| DRONEDARONE HYDROCHLORIDE             | 141625-93-6                     |  |
| DULOXETINE HYDROCHLORIDE              | 136434-34-9                     |  |
| EBSELEN                               | 60940-34-3                      |  |
| EMETINE DIHYDROCHLORIDE               | 316-42-7, 483-18-1 [emetine]    |  |
| EPIAFZELECHIN (2R,3R)(-)              | 24808-04-6                      |  |
| ERYTHROMYCIN STEARATE                 | 643-22-1; 114-07-8(base)        |  |
| ESCIN                                 | 6805-41-0                       |  |
| FLUPHENAZINE HYDROCHLORIDE            | 146-56-5                        |  |
| GAMBOGIC ACID                         | 2752-65-0                       |  |
| GENTIAN VIOLET                        | 548-62-9                        |  |
| GRAMICIDIN (gramicidin A shown)       | 1405-97-6                       |  |
| HELENINE                              | 546-43-0                        |  |
| HEXACHLOROPHENE                       | 70-30-4                         |  |
| HEXETIDINE                            | 141-94-6                        |  |
| HEXYLRESORCINOL                       | 136-77-6                        |  |
| HOMOSALATE                            | 118-56-9                        |  |
| INDOXYL ACETATE                       |                                 |  |
| IVERMECTIN                            | 70288-86-7                      |  |
| LOPERAMIDE HYDROCHLORIDE              | 34552-83-5, 53179-11-6 [lopera  |  |
| MEFLOQUINE HYDROCHLORIDE              | 53230-10-7                      |  |
| MENADIONE                             | 58-27-5                         |  |
| MENTHYL BENZOATE                      | 71617-14-6                      |  |
| METERGOLINE                           | 17692-51-2                      |  |

|                               |                                       |  |
|-------------------------------|---------------------------------------|--|
| METHYL GAMBOGATE              |                                       |  |
| METHYL GAMBOGATE METHYL ETHER |                                       |  |
| METHYL GAMBOGINATE            |                                       |  |
| MITOXANTRONE HYDROCHLORIDE    | 70476-82-3, 65271-80-9 [base]         |  |
| MOXIDECTIN                    | 113507-06-5                           |  |
| NONOXYNOL-9                   | 26027-38-3                            |  |
| OBTUSAQUINONE                 | 21105-15-7                            |  |
| OCTISALATE                    | 118-60-5                              |  |
| OXYPHENBUTAZONE               | 7081-38-1, 129-20-4 [anhydrous]       |  |
| PACLITAXEL                    | 33069-62-4                            |  |
| PARTHENOLIDE                  | 20554-84-1                            |  |
| PATULIN                       | 149-29-1                              |  |
| PERHEXILINE MALEATE           | 6724-53-4, 6621-47-2 [perhexilin]     |  |
| PERPHENAZINE                  | 58-39-9                               |  |
| PHENACETIN                    | 62-44-2                               |  |
| PHENYLMERCURIC ACETATE        | 62-38-4                               |  |
| PIPLARTINE                    | 20069-09-4                            |  |
| PLUMBAGIN                     | 481-42-5                              |  |
| PODOFILOX                     | 518-28-5                              |  |
| POMIFERIN TRIACETATE          |                                       |  |
| PROADIFEN HYDROCHLORIDE       | 62-68-0                               |  |
| PROFLAVINE HEMISULFATE        | 553-30-0, 1811-28-5                   |  |
| PROPOFOL                      | 2078-54-8                             |  |
| PUROMYCIN DIHYDROCHLORIDE     | 58-58-2, 53-79-2 [puromycin]          |  |
| PYRILAMINE MALEATE            | 59-33-6, 91-84-9 [pyrilamine]         |  |
| PYRIMETHAMINE                 | 58-14-0                               |  |
| PYRITHIONE ZINC               | 13463-41-7                            |  |
| PYRROMYCIN                    | 668-17-7                              |  |
| PYRVINIUM PAMOATE             | 3546-41-6                             |  |
| QUINESTROL                    | 152-43-2                              |  |
| RIMANTADINE HYDROCHLORIDE     | 1501-84-4                             |  |
| SANGUINARIUM CHLORIDE         | 5578-73-4                             |  |
| SECURININE                    | 5610-40-2                             |  |
| SELAMECTIN                    | 165108-07-6                           |  |
| SERTRALINE HYDROCHLORIDE      | 79559-97-0; 79617-96-2(base)          |  |
| SULOCTIDIL                    | 54063-56-8, 54767-75-8                |  |
| TENIPOSIDE                    | 29767-20-2                            |  |
| TERFENADINE                   | 50679-08-8                            |  |
| THIMEROSAL                    | 54-64-8                               |  |
| THIRAM                        | 137-26-8                              |  |
| TOPOTECAN HYDROCHLORIDE       | 119413-54-6                           |  |
| TOTAROL                       | 511-15-9                              |  |
| TRIFLUOPERAZINE HYDROCHLORIDE | 440-17-5                              |  |
| TRIFLUPROMAZINE HYDROCHLORIDE | 1098-60-8, 146-54-3 [triflupromazine] |  |
| TRIPTOLIDE                    | 38748-32-2                            |  |
| URSOLIC ACID                  | 77-52-1                               |  |
| VERBENALIN                    | 548-37-8                              |  |
| VINBLASTINE SULFATE           | 143-67-9, 865-21-4 [vinblastine]      |  |
| VORINOSTAT                    | 149647-78-9                           |  |
| VORTIOXETINE HYDROBROMIDE     | 508233-74-7                           |  |

**Supplementary Information Table 2 - Results of the screenings with drugs from the Prestwick Chemical Library (left) and Spectrum Collection (right) using the Syncytium Inhibition Assay (SIA). Red: z score <-2.58 or >2.58. Blue: z score from <-1.96 to -2.58 or from >1.96 to 2.58.**

| Syncytium Inhibition Assay (SIA) |             |         |
|----------------------------------|-------------|---------|
| Prestwick Chemical Library       |             |         |
| Chemical name                    | CAS number  | Z score |
| Niclosamide                      | 50-65-7     | -4.8338 |
| Monensin sodium salt             | 22373-78-0  | -4.7132 |
| Amlodipine                       | 88150-42-9  | -4.2955 |
| Spiperone                        | 749-02-0    | -4.2575 |
| Paroxetine Hydrochloride         | 110429-35-1 | -3.8382 |
| Indatraline hydrochloride        | 86939-10-8  | -3.7783 |
| Prenylamine lactate              | 69-43-2     | -3.7513 |
| Gefitinib                        | 184475-35-2 | -3.5856 |
| Pizotifen malate                 | 1201595     | -3.5510 |
| Nebivolol hydrochloride          | 99200-09-6  | -3.4915 |
| Imatinib                         | 152459-95-5 | -3.3525 |
| Metixene hydrochloride           | 1553-34-0   | -3.2361 |
| Fendiline hydrochloride          | 13636-18-5  | -3.1143 |
| Aprepitant                       | 170729-80-3 | -3.0725 |
| Zuclopenthixol dihydrochloride   | 633-59-0    | -3.0453 |
| (R)-Duloxetine hydrochloride     | 116539-60-7 | -3.0190 |
| Maprotiline hydrochloride        | 10347-81-6  | -3.0003 |
| Clofazimine                      | 2030-63-9   | -2.9947 |
| Clomiphene citrate (Z,E)         | 50-41-9     | -2.9893 |
| Terconazole                      | 67915-31-5  | -2.9684 |
| Sertindole                       | 106516-24-9 | -2.9231 |
| Thioridazine hydrochloride       | 130-61-0    | -2.9188 |
| Metergoline                      | 17692-51-2  | -2.8891 |
| Thiethylperazine dimaleate       | 52239-63-1  | -2.8741 |
| Lanatoside C                     | 17575-22-3  | -2.8459 |
| Thonzonium bromide               | 553-08-2    | -2.8395 |
| Fluphenazine dihydrochloride     | 146-56-5    | -2.7884 |
| Digitoxigenin                    | 143-62-4    | -2.7765 |
| Cyclosporin A                    | 59865-13-3  | -2.7663 |
| Norcyclobenzaprine               | 303-50-4    | -2.7514 |
| Cycloheximide                    | 66-81-9     | -2.7317 |
| Thiopropazine dimesylate         | 2347-80-0   | -2.6904 |
| Lopinavir                        | 192725-17-0 | -2.6815 |
| Astemizole                       | 68844-77-9  | -2.6799 |
| Carvedilol                       | 72956-09-3  | -2.6552 |
| Protriptyline hydrochloride      | 1225-55-4   | -2.6267 |
| Clemastine fumarate              | 14976-57-9  | -2.6092 |
| Vatalanib                        | 212141-54-3 | -2.5684 |
| Desloratadine                    | 100643-71-8 | -2.5628 |
| Digoxigenin                      | 1672-46-4   | -2.5390 |
| Hexachlorophene                  | 70-30-4     | -2.4618 |
| Methiothepin maleate             | 19728-88-2  | -2.4302 |
| Nortriptyline hydrochloride      | 894-71-3    | -2.3930 |
| Pirlindole mesylate              | 60762-57-4  | -2.3792 |
| Simvastatin                      | 79902-63-9  | -2.3694 |
| Prochlorperazine dimaleate       | 84-02-6     | -2.3199 |
| Mevastatin                       | 73573-88-3  | -2.2524 |
| Trifluoperazine dihydrochloride  | 440-17-5    | -2.2397 |
| Atorvastatin                     | 134523-00-5 | -2.1483 |
| Azelastine hydrochloride         | 79307-93-0  | -2.1375 |
| Chloroquine diphosphate          | 50-63-5     | -2.1051 |
| Darifenacin hydrobromide         | 133099-07-7 | -2.0967 |
| Amitriptyline hydrochloride      | 549-18-8    | -2.0897 |
| Cisatracurium besylate           | 64228-79-1  | -2.0757 |
| Dipivefrin hydrochloride         | 64019-93-8  | -2.0737 |
| Fluspirilen                      | 1841-19-6   | -2.0058 |
| Itraconazole                     | 84625-61-6  | -1.9617 |
| Piperacetazine                   | 3819-00-9   | -1.9592 |
| Posaconazole                     | 171228-49-2 | -1.9541 |
| Phensuximide                     | 86-34-0     | -1.9440 |
| Hycanthone                       | 3105-97-3   | -1.8945 |
| Cyproheptadine hydrochloride     | 969-33-5    | -1.8856 |
| Chlorhexidine                    | 55-56-1     | -1.8565 |
| Canrenone                        | 976-71-6    | -1.8417 |
| Nitazoxanide                     | 55981-09-4  | -1.8384 |
| Isradipine                       | 75695-93-1  | -1.8228 |
| Salmeterol                       | 89365-50-4  | -1.8197 |
| Fluoxetine hydrochloride         | 59333-67-4  | -1.8123 |
| Desonide                         | 638-94-8    | -1.8114 |
| Benzotropine mesylate            | 132-17-2    | -1.7723 |
| Chlorprothixene hydrochloride    | 6469-93-8   | -1.7523 |
| Isoetharine mesylate salt        | 7279-75-6   | -1.7243 |

| Syncytium Inhibition Assay (SIA)                           |                             |         |
|------------------------------------------------------------|-----------------------------|---------|
| The Spectrum Collection, MS Discovery System               |                             |         |
| Chemical name                                              | CAS number                  | z score |
| MONENSIN SODIUM                                            | 22373-78-0                  | -4.7221 |
| NICLOSAMIDE                                                | 50-65-7                     | -4.4942 |
| PERGOLIDE MESYLATE                                         | 66104-22-1                  | -4.4923 |
| SERTRALINE HYDROCHLORIDE                                   | 79559-97-0; 79617-96-2(ba   | -4.4217 |
| HYDROXYZINE HYDROCHLORIDE                                  | 2192-30-3                   | -3.9617 |
| DULOXETINE HYDROCHLORIDE                                   | 136434-34-9                 | -4.2951 |
| HEXACHLOROPHENE                                            | 70-30-4                     | -4.2276 |
| FLUPHENAZINE HYDROCHLORIDE                                 | 146-56-5                    | -4.0758 |
| ARTENIMOL                                                  | 81496-81-3                  | -3.9988 |
| NONOXYNOL-9                                                | 26027-38-3                  | -3.9882 |
| METHYL CHOLATE                                             | 1448-36-8                   | -3.9306 |
| LOPERAMIDE HYDROCHLORIDE                                   | 34552-83-5, 53179-11-6 [lo  | -3.9034 |
| SALINOMYCIN, SODIUM                                        | 55721-31-8; 53003-10-4 (ac  | -3.8316 |
| DICHLOROPHEN                                               | 97-23-4                     | -3.7467 |
| CYCLOBENZAPRINE HYDROCHLORIDE                              | 6202-23-9, 303-53-7 [cyclot | -3.7332 |
| APREPITANT                                                 | 170729-80-3                 | -3.7264 |
| LOPINAVIR                                                  | 192725-17-0                 | -3.5734 |
| ESCIN                                                      | 6805-41-0                   | -3.4840 |
| IMATINIB                                                   | 152459-95-5                 | -3.3923 |
| DIGITOXIN                                                  | 71-63-6                     | -3.3280 |
| BENZYDAMINE HYDROCHLORIDE                                  | 132-69-4                    | -3.2928 |
| 2',4'-DIHYDROXY-4-METHOXYCHALCONE                          | 81674-91-1                  | -3.2048 |
| TRICLOSAN                                                  | 3380-34-5                   | -3.1978 |
| 4-HYDROXYCHALCONE                                          | 20426-12-4                  | -3.1851 |
| CHLORHEXIDINE DIHYDROCHLORIDE                              | 3697-42-5, 55-56-1 [chlorhe | -3.1463 |
| TERCONAZOLE                                                | 67915-31-5                  | -3.0931 |
| NORTRIPTYLINE HYDROCHLORIDE                                | 894-71-3, 72-69-5 [nortript | -3.0848 |
| PERPHENAZINE                                               | 58-39-9                     | -3.0777 |
| CARVEDILOL                                                 | 72956-09-3                  | -3.0445 |
| BRAZILIN                                                   | 474-07-7                    | -2.9647 |
| OUABAIN OCTAHYDRATE                                        | 11018-89-6                  | -2.9566 |
| BENZTROPINE MESYLATE                                       | 132-17-2, 86-13-5 [benztrop | -2.8622 |
| CONESSINE                                                  | 5913-82-6, 546-06-5 [cones  | -2.8264 |
| PROMETHAZINE HYDROCHLORIDE                                 | 58-33-3, 60-87-7 [prometha  | -2.7919 |
| ANTHRACENE-1,4-DIONE                                       | 635-12-1                    | -2.7844 |
| METITEPINE MESYLATE                                        | 20229-30-5                  | -2.7808 |
| ACRIFLAVINIUM HYDROCHLORIDE                                | 8063-24-9                   | -2.7745 |
| 4'-HYDROXYCHALCONE                                         | 2657-25-2                   | -2.7619 |
| NITAZOXANIDE                                               | 55981-09-4                  | -2.7560 |
| 7-DESACETOXY-6,7-DEHYDROGEDUNIN                            |                             | -2.7452 |
| 1,3-DIDEACETYL-7-DEACETOXY-7-OXOKHIVORIN                   |                             | -2.7256 |
| PROCHLORPERAZINE EDISYLATE                                 | 1257-78-9, 84-02-6 [prochlc | -2.7044 |
| ETHOPROPazine HYDROCHLORIDE                                | 1094-08-2, 522-00-9 [ethop  | -2.6856 |
| HARMINE                                                    | 442-51-3                    | -2.6800 |
| METERGOLINE                                                | 17692-51-2                  | -2.6686 |
| EMETINE DIHYDROCHLORIDE                                    | 316-42-7, 483-18-1 [emetin  | -2.6266 |
| CYCLOSPORINE                                               | 59865-13-3                  | -2.6090 |
| NYLIDRIN HYDROCHLORIDE                                     | 849-55-8                    | -2.5564 |
| DIGOXIN                                                    | 20830-75-5                  | -2.5553 |
| ATORVASTATIN CALCIUM                                       | 134523-03-8                 | -2.5529 |
| TERFENADINE                                                | 50679-08-8                  | -2.5516 |
| METHYL 6-METHYL-PYROGALLIN-4-CARBOXYLATE TETRAMETHYL ETHER |                             | -2.4967 |
| MEVASTATIN                                                 | 73573-88-3                  | -2.4922 |
| PHENETHYL CAFFEATE (CAPE)                                  | 104594-70-9                 | -2.4623 |
| BITHIONOL                                                  | 97-18-7                     | -2.4513 |
| CARVEDILOL PHOSPHATE                                       | 610309-89-2                 | -2.3863 |
| DESLORATADINE HYDROCHLORIDE                                | 100643-71-8(base)           | -2.3377 |
| DIHYDROCELASTROL                                           |                             | -2.2995 |
| PRIMAQUINE PHOSPHATE                                       | 63-45-6                     | -2.2405 |
| STROPHANTHIDIN ACETATE                                     |                             | -2.1893 |
| DEGUELIN(-)                                                | 522-17-8                    | -2.1649 |
| CEDRELONE                                                  | 1254-85-9                   | -2.1580 |
| beta-NAPHTHOL                                              | 135-19-3                    | -2.1579 |
| THIOPHANATE METHYL                                         | 23564-06-9                  | -2.1269 |
| ANTAZOLINE PHOSPHATE                                       | 91-75-8                     | -2.1261 |
| TOLONIUM CHLORIDE                                          | 92-31-9                     | -2.1192 |
| DIGOXIGENIN                                                | 1672-46-4                   | -2.1100 |
| SPIPERONE                                                  | 749-02-0                    | -2.1050 |
| EIAIDYLPHOSPHOCHOLINE                                      | 156161-89-6                 | -2.1000 |
| KETOCONAZOLE                                               | 65277-42-1                  | -2.0904 |
| THIORIDAZINE HYDROCHLORIDE                                 | 130-61-0, 50-52-2 [thiorida | -2.0708 |
| DISULFIRAM                                                 | 97-77-8                     | -2.0699 |

|                                           |             |         |
|-------------------------------------------|-------------|---------|
| Homochlorcyclizine dihydrochloride        | 1982-36-1   | -1.7096 |
| Zotepine                                  | 26615-21-4  | -1.6992 |
| Ethopropazine hydrochloride               | 1094-08-2   | -1.6626 |
| Imidurea                                  | 39236-46-9  | -1.6418 |
| Suloctidil                                | 54063-56-8  | -1.6374 |
| Tomoxetine hydrochloride                  | 82248-59-7  | -1.5801 |
| Desipramine hydrochloride                 | 58-28-6     | -1.5600 |
| Perphenazine                              | 58-39-9     | -1.5191 |
| Ioxaglic acid                             | 59017-64-0  | -1.5162 |
| Valsartan                                 | 137862-53-4 | -1.5120 |
| Nifekalant                                | 130636-43-0 | -1.5119 |
| Dosulepin hydrochloride                   | 897-15-4    | -1.5019 |
| Primaquine diphosphate                    | 63-45-6     | -1.4880 |
| Orphenadrine hydrochloride                | 341-69-5    | -1.4846 |
| Lofepamine                                | 23047-25-8  | -1.4773 |
| Brimonidine L-Tartrate                    | 70359-46-5  | -1.4635 |
| Racemephrine hydrochloride                | 329-63-5    | -1.4580 |
| Zardaverine                               | 101975-10-4 | -1.4518 |
| Alfaxalone                                | 23930-19-0  | -1.4398 |
| Asenapine maleate                         | 85650-56-2  | -1.4297 |
| Melengestrol acetate                      | 2919-66-6   | -1.4179 |
| Tamoxifen citrate                         | 54965-24-1  | -1.3971 |
| Clozapine                                 | 5786-21-0   | -1.3960 |
| Dilazep dihydrochloride                   | 20153-98-4  | -1.3782 |
| Loratadine                                | 79794-75-5  | -1.3664 |
| THIP Hydrochloride                        | 85118-33-8  | -1.3630 |
| Oxalamine citrate salt                    | 1949-20-8   | -1.3536 |
| Citalopram Hydrobromide                   | 59729-32-7  | -1.3520 |
| Iopanoic acid                             | 96-83-3     | -1.3519 |
| Rufloxacin                                | 101363-10-4 | -1.3507 |
| Tolazamide                                | 1156-19-0   | -1.3502 |
| Mebhydroline 1,5-naphthalenedisulfonate   | 6153-33-9   | -1.3402 |
| Rimantadine Hydrochloride                 | 13392-28-4  | -1.3389 |
| Methotrimeprazine maleat salt             | 7104-38-3   | -1.3302 |
| Moricizine hydrochloride                  | 31883-05-3  | -1.3270 |
| Silodosin                                 | 160970-54-7 | -1.3261 |
| Lansoprazole                              | 103577-45-3 | -1.3130 |
| Hexetidine                                | 141-94-6    | -1.2949 |
| Nitrocaramiphen hydrochloride             | 98636-73-8  | -1.2858 |
| Dronedrone hydrochloride                  | 141626-36-0 | -1.2584 |
| Alfadolone acetate                        | 23930-37-2  | -1.2534 |
| Doxepin hydrochloride                     | 1229-29-4   | -1.2482 |
| Clomipramine hydrochloride                | 17321-77-6  | -1.2406 |
| Palonosetron hydrochloride                | 135729-62-3 | -1.2223 |
| Dextromethorphan hydrobromide monohydrate | 6700-34-1   | -1.2175 |
| Atracurium besylate                       | 64228-81-5  | -1.2111 |
| Hexestrol                                 | 84-16-2     | -1.1990 |
| Cloperastine hydrochloride                | 14984-68-0  | -1.1836 |
| Zoledronic acid hydrate                   | 165800-06-6 | -1.1773 |
| Chlorcyclizine hydrochloride              | 1620-21-9   | -1.1763 |
| Nisoxetine hydrochloride                  | 57754-86-6  | -1.1728 |
| Clarithromycin                            | 81103-11-9  | -1.1679 |
| Opipramol dihydrochloride                 | 909-39-7    | -1.1481 |
| Amlexanox                                 | 68302-57-8  | -1.1471 |
| Diphenylpyraline hydrochloride            | 132-18-3    | -1.1461 |
| (S)-propranolol hydrochloride             | 839971      | -1.1457 |
| Promethazine hydrochloride                | 58-33-3     | -1.1393 |
| Pimozide                                  | 2062-78-4   | -1.0924 |
| Bepidil hydrochloride                     | 74764-40-2  | -1.0765 |
| Clofilium tosylate                        | 92953-10-1  | -1.0650 |
| Ezetimibe                                 | 163222-33-1 | -1.0595 |
| Cyclobenzaprine hydrochloride             | 6202-23-9   | -1.0517 |
| Florfenicol                               | 73231-34-2  | -1.0408 |
| Moxifloxacin                              | 151096-09-2 | -1.0385 |
| Nevirapine                                | 129618-40-2 | -1.0253 |
| Cyclizine hydrochloride                   | 303-25-3    | -1.0232 |
| Acetylsalicylic acid                      | 50-78-2     | -1.0171 |
| Trimipramine maleate salt                 | 521-78-8    | -1.0152 |
| Dicumarol                                 | 66-76-2     | -1.0133 |
| Efavirenz                                 | 154598-52-4 | -1.0113 |
| Actarit                                   | 18699-02-0  | -1.0090 |
| Tetracaine hydrochloride                  | 136-47-0    | -1.0010 |
| Reboxetine mesylate                       | 98769-81-4  | -0.9915 |
| Benzamil hydrochloride                    | 2898-76-2   | -0.9784 |
| Medrysone                                 | 2668-66-8   | -0.9589 |
| Doxazosin mesylate                        | 77883-43-3  | -0.9539 |
| Benperidol                                | 2062-84-2   | -0.9356 |
| Pinaverium bromide                        | 53251-94-8  | -0.9261 |
| Camptothecin (S,+)                        | 2114454     | -0.9082 |

|                                    |                                   |         |
|------------------------------------|-----------------------------------|---------|
| DIPHENHYDRAMINE HYDROCHLORIDE      | 147-24-0                          | -2.0615 |
| CETALKONIUM CHLORIDE               | 122-18-9                          | -2.0581 |
| CYCLOHEXIMIDE                      | 66-81-9                           | -2.0488 |
| FLUVASTATIN SODIUM                 | 93957-55-2                        | -2.0464 |
| BERBAMINE HYDROCHLORIDE            | 6078-17-7                         | -2.0398 |
| ZOXAZOLAMINE                       | 61-80-3                           | -2.0315 |
| PHENOLPHTHALEIN                    | 77-09-8                           | -2.0152 |
| ACRISORCIN                         | 7527-91-5                         | -2.0150 |
| DESIPRAMINE HYDROCHLORIDE          | 58-28-6, 50-47-5 [desipramine]    | -1.9876 |
| CHLORAZANIL HYDROCHLORIDE          | 2019-25-2                         | -1.9798 |
| ETHINYL ESTRADIOL                  | 57-63-6                           | -1.9669 |
| TRIMEPRAZINE TARTRATE              | 4330-99-8, 41375-66-0 [repro]     | -1.9591 |
| TRIFLUOPERAZINE HYDROCHLORIDE      | 440-17-5                          | -1.9507 |
| CHLOROACETOXYQUINOLINE             | 10173-02-1                        | -1.9465 |
| IMIPRAMINE HYDROCHLORIDE           | 113-52-0                          | -1.9450 |
| ESTRIOL BENZYL ETHER               |                                   | -1.9442 |
| PROMAZINE HYDROCHLORIDE            | 53-60-1, 58-40-2 [promazine]      | -1.9402 |
| PICOLAMINE                         | 3731-52-0                         | -1.9236 |
| ZAPRINAST                          | 37762-06-4                        | -1.9077 |
| PROCYCLIDINE HYDROCHLORIDE         | 1508-76-5, 77-37-2 [procyclidine] | -1.8942 |
| TIOGUANINE                         | 154-42-7                          | -1.8789 |
| DICHLORVOS                         | 62-73-7                           | -1.8764 |
| 4'-METHOXYCHALCONE                 | 22966-19-4                        | -1.8630 |
| ORPHENADRINE CITRATE               | 4682-36-4, 83-98-7 [orphenadrine] | -1.8558 |
| OXOLAMINE CITRATE                  | 959-14-8 (base)                   | -1.8521 |
| KAEMPFEROL                         | 520-18-3                          | -1.8421 |
| CITRININ                           | 518-75-2                          | -1.8365 |
| LOVASTATIN                         | 75330-75-5                        | -1.8308 |
| ISOPOMIFERIN                       |                                   | -1.8306 |
| L(+/-)-ALLIIN                      | 556-27-4(-)                       | -1.8228 |
| TRIPTOLIDE                         | 38748-32-2                        | -1.7846 |
| 4'-HYDROXYFLAVANONE                |                                   | -1.7822 |
| 2-HYDROXYXANTHONE                  |                                   | -1.7770 |
| DACTINOMYCIN                       | 50-76-0                           | -1.7766 |
| CHLOROQUINE DIPHOSPHATE            | 50-63-5                           | -1.7698 |
| FLUOXETINE HYDROCHLORIDE           | 54910-89-3                        | -1.7649 |
| METHOTREXATE HYDRATE               | 59-05-2                           | -1.7605 |
| HEXESTROL                          | 84-16-2                           | -1.7602 |
| 4,6-DIMETHOXYTOLUQUINONE           |                                   | -1.7556 |
| PARACHLOROPHENOL                   | 106-48-9                          | -1.7494 |
| DICLAZURIL                         | 101831-37-2                       | -1.7432 |
| PIZOTYLIN MALATE                   | 1201595                           | -1.7253 |
| OBTUSAQUINONE                      | 21105-15-7                        | -1.7242 |
| SORBITOL HEXAACETATE               | 7208-47-1                         | -1.7198 |
| CHLORPROMAZINE HYDROCHLORIDE       | 69-09-0                           | -1.7092 |
| EFAROXAN HYDROCHLORIDE             | 89197-32-0                        | -1.6798 |
| DROSPIRONONE                       | 67392-87-4                        | -1.6589 |
| TRIPROLIDINE HYDROCHLORIDE         | 6138-79-0, 550-70-9 [anhydrous]   | -1.6536 |
| METHYL GAMBOGATE                   |                                   | -1.6524 |
| AVOCADYNE ACETATE                  | 24607-06-5                        | -1.6519 |
| OXELADIN CITRATE                   | 52432-72-1, 468-61-1 (base)       | -1.6160 |
| TRYPAN BLUE                        | 72-57-1                           | -1.6134 |
| ISOCOTOIN                          | 81525-12-4                        | -1.6049 |
| PILOCARPINE NITRATE                | 148-72-1, 92-13-7 [pilocarpine]   | -1.5992 |
| IRIGENIN TRIMETHYL ETHER           |                                   | -1.5959 |
| alpha-CYANO-3-HYDROXYCINNAMIC ACID | 54673-07-3                        | -1.5887 |
| EUGENOL                            | 97-53-0                           | -1.5821 |
| MYCOPHENOLIC ACID                  | 24280-93-1                        | -1.5816 |
| DEOXYSPAPPANONE B TRIMETHYL ETHER  |                                   | -1.5649 |
| alpha-MANGOSTIN                    | 1551491                           | -1.5636 |
| TETRACAINE HYDROCHLORIDE           | 136-47-0, 94-24-6 [tetracaine]    | -1.5634 |
| EPOXYGEDUNIN                       |                                   | -1.5606 |
| DIMENHYDRINATE                     | 523-87-5                          | -1.5543 |
| BAZEDOXIFENE ACETATE               | 198481-33-3                       | -1.5490 |
| IDOXURIDINE                        | 54-42-2                           | -1.5474 |
| LAPATINIB                          | 231277-92-2                       | -1.4936 |
| MAFENIDE HYDROCHLORIDE             | 138-39-6                          | -1.4865 |
| beta-LAPACHONE                     | 4707-32-8                         | -1.4821 |
| FASUDIL HYDROCHLORIDE              | 103745-39-7                       | -1.4809 |
| LEVONORDEFIN                       | 829-74-3, 18829-78-2 [replaxin]   | -1.4694 |
| LAWSONE METHYL ETHER               | 2348-82-5                         | -1.4607 |
| CORTEXOLONE                        | 152-58-9                          | -1.4548 |
| BETAMIPRON                         | 3440-28-6                         | -1.4487 |
| DIPERODON HYDROCHLORIDE            | 537-12-2                          | -1.4483 |
| CHLORPROTHIXENE HYDROCHLORIDE      | 113-59-7                          | -1.4371 |
| CLEMIZOLE HYDROCHLORIDE            | 1163-36-6, 442-52-4(base)         | -1.4334 |
| ISOPILOCARPINE NITRATE             | 531-35-1 (base)                   | -1.4260 |
| NILVADIPINE                        | 75530-68-6                        | -1.4178 |
| PIMETHIXENE MALEATE                | 314-03-4                          | -1.4141 |

|                                         |             |         |
|-----------------------------------------|-------------|---------|
| Azapropazone                            | 13539-59-8  | -0.9080 |
| Diloxanide furoate                      | 3736-81-0   | -0.9058 |
| Megestrol acetate                       | 595-33-5    | -0.8994 |
| Brompheniramine maleate                 | 980-71-2    | -0.8952 |
| Iopamidol                               | 60166-93-0  | -0.8949 |
| Rifabutin                               | 72559-06-9  | -0.8949 |
| Terbutaline hemisulfate                 | 23031-32-5  | -0.8930 |
| Disulfiram                              | 97-77-8     | -0.8810 |
| Clofibrate                              | 637-07-0    | -0.8759 |
| Dimenhydrinate                          | 523-87-5    | -0.8536 |
| Nialamide                               | 51-12-7     | -0.8523 |
| Cyanocobalamin                          | 68-19-9     | -0.8500 |
| Tripeleminamine hydrochloride           | 154-69-8    | -0.8499 |
| Escitalopram oxalate                    | 128196-01-0 | -0.8496 |
| Thioperamide maleate                    | 106243-16-7 | -0.8418 |
| Ticarcillin sodium                      | 74682-62-5  | -0.8413 |
| Dopamine hydrochloride                  | 62-31-7     | -0.8350 |
| Ketotifen fumarate                      | 34580-14-8  | -0.8343 |
| Butacaine                               | 149-16-6    | -0.8303 |
| Furosemide                              | 54-31-9     | -0.8253 |
| Memantine Hydrochloride                 | 41100-52-1  | -0.8233 |
| Trapidil                                | 15421-84-8  | -0.8177 |
| 1,8-Dihydroxyanthraquinone              | 117-10-2    | -0.8143 |
| Tripolidine hydrochloride               | 550-70-9    | -0.8127 |
| Valdecoxib                              | 181695-72-7 | -0.8039 |
| Diperodon hydrochloride                 | 537-12-2    | -0.8023 |
| Dimethisoquin hydrochloride             | 2773-92-4   | -0.8011 |
| Piretanide                              | 55837-27-9  | -0.7938 |
| Formestane                              | 566-48-3    | -0.7913 |
| 3-alpha-Hydroxy-5-beta-androstan-17-one | 53-42-9     | -0.7861 |
| Benzocaine                              | 94-09-7     | -0.7838 |
| Pramipexole dihydrochloride             | 104632-25-9 | -0.7676 |
| Nylidrin                                | 447-41-6    | -0.7669 |
| Sulfapyridine                           | 144-83-2    | -0.7656 |
| Propofol                                | 2078-54-8   | -0.7630 |
| Vardenafil                              | 224785-90-4 | -0.7630 |
| Chlorpheniramine maleate                | 113-92-8    | -0.7628 |
| (+)-Isoproterenol (+)-bitartrate salt   | 14638-70-1  | -0.7623 |
| Nalmefene hydrochloride                 | 58895-64-0  | -0.7582 |
| Urapidil hydrochloride                  | 64887-14-5  | -0.7545 |
| Sulfisoxazole                           | 127-69-5    | -0.7502 |
| Mirabegron                              | 223673-61-8 | -0.7397 |
| Enilconazole                            | 35554-44-0  | -0.7357 |
| Dydrogesterone                          | 152-62-5    | -0.7294 |
| Vinpocetine                             | 42971-09-5  | -0.7294 |
| Benzydamine hydrochloride               | 132-69-4    | -0.7273 |
| Alendronate sodium                      | 121268-17-5 | -0.7270 |
| Oxyphenbutazone                         | 129-20-4    | -0.7252 |
| Pentetic acid                           | 67-43-6     | -0.7223 |
| Ethoxzolamide                           | 452-35-7    | -0.7203 |
| Acetpromazine maleate salt              | 3598-37-6   | -0.7134 |
| Lomerizine hydrochloride                | 101477-54-7 | -0.7132 |
| Mesoridazine besylate                   | 32672-69-8  | -0.7047 |
| Etomidate                               | 33125-97-2  | -0.7029 |
| Gliquidone                              | 33342-05-1  | -0.6984 |
| Flurandrenolide                         | 1524-88-5   | -0.6967 |
| Pramoxine hydrochloride                 | 637-58-1    | -0.6950 |
| Tolterodine tartrate                    | 209747-05-7 | -0.6948 |
| Altrenogest                             | 850-52-2    | -0.6948 |
| Lidoflazine                             | 3416-26-0   | -0.6806 |
| Hexamethonium dibromide dihydrate       | 55-97-0     | -0.6802 |
| Ascorbic acid                           | 50-81-7     | -0.6797 |
| Thiocolchicoside                        | 602-41-5    | -0.6784 |
| Sulmazole                               | 73384-60-8  | -0.6769 |
| Nifuroxazide                            | 965-52-6    | -0.6718 |
| Chlormadinone acetate                   | 302-22-7    | -0.6698 |
| Delavirdine                             | 136817-59-9 | -0.6652 |
| Doxapram hydrochloride                  | 7081-53-0   | -0.6649 |
| Nateglinide                             | 105816-04-4 | -0.6645 |
| Pefloxacin                              | 70458-92-3  | -0.6625 |
| Procyclidine hydrochloride              | 1508-76-5   | -0.6536 |
| Levonordefrin                           | 829-74-3    | -0.6524 |
| Dolasetron mesilate                     | 115956-13-3 | -0.6478 |
| Propafenone hydrochloride               | 34183-22-7  | -0.6461 |
| Methyl benzethonium chloride            | 25155-18-4  | -0.6441 |
| Nabumetone                              | 42924-53-8  | -0.6432 |
| Triclosan                               | 3380-34-5   | -0.6431 |
| Phenothiazine                           | 92-84-2     | -0.6390 |
| Ambrisentan                             | 177036-94-1 | -0.6369 |

|                                                            |                                      |         |
|------------------------------------------------------------|--------------------------------------|---------|
| BISPHENOL A                                                | 80-05-7                              | -1.3939 |
| ISOLIQURITIGENIN                                           | 961-29-5                             | -1.3897 |
| FLAVONE                                                    | 525-82-6                             | -1.3776 |
| EPIAFZELECHIN TRIMETHYL ETHER                              |                                      | -1.3725 |
| 5-HYDROXY-2',4',7,8-TETRAMETHOXYFLAVONE                    | 123316-61-0                          | -1.3614 |
| 3-ISOBUTYL-1-METHYLXANTHINE                                | 28822-58-4                           | -1.3425 |
| 3,6-DIMETHOXYFLAVONE                                       |                                      | -1.3399 |
| N-HYDROXYMETHYLNICOTINAMIDE                                | 3569-99-1                            | -1.3385 |
| DIHYDROFISSINOLIDE                                         |                                      | -1.3340 |
| N-(9-FLUORENYLMETHOXYCARBONYL)-L-LEUCINE                   | 35661-60-0                           | -1.3268 |
| OXIDOPAMINE HYDROCHLORIDE                                  | 28094-15-7                           | -1.3243 |
| LEOIDIN                                                    | 105350-54-7                          | -1.3202 |
| MUNDULONE                                                  | 481-94-7                             | -1.3155 |
| beta-AMYRIN ACETATE                                        | 1616-93-9                            | -1.3039 |
| PROCODAZOLE                                                | 23249-97-0                           | -1.2978 |
| SULOCTIDIL                                                 | 54063-56-8, 54767-75-8               | -1.2907 |
| QUINACRINE HYDROCHLORIDE                                   | 6151-30-0                            | -1.2840 |
| KETOTIFEN FUMARATE                                         | 34580-14-8                           | -1.2839 |
| 3H-1,2-DITHIOLE-3-THIONE                                   | 534-25-8                             | -1.2791 |
| 1S,2R-PHENYLPROPANOLAMINE HYDROCHLORIDE                    | 154-41-6                             | -1.2788 |
| CARBINOXAMINE MALEATE                                      | 3505-38-2, 486-16-8 [carbinolamine]  | -1.2745 |
| HEMATEIN                                                   | 475-25-2                             | -1.2738 |
| CYPERMETHRIN                                               | 52315-07-8                           | -1.2571 |
| ERGOSTEROL                                                 | 57-87-4                              | -1.2519 |
| CARBIDOPA                                                  | 28860-95-9                           | -1.2509 |
| 6-AZATHYMINE                                               | 932-53-6                             | -1.2504 |
| METHYL 7-DESOXYPURPURUGALLIN-7-CARBOXYLATE TRIMETHYL ETHER |                                      | -1.2415 |
| L-PHENYLEPHRINE HYDROCHLORIDE                              | 61-76-7                              | -1.2378 |
| NITROXOLINE                                                | 4008-48-4                            | -1.2355 |
| HYDROCORTISONE HEMISUCCINATE                               | 83784-20-7, 2203-97-6 [anhydrous]    | -1.2333 |
| PRONETALOL HYDROCHLORIDE                                   | 54-80-8                              | -1.2288 |
| 6,2'-DIMETHOXYFLAVONE                                      |                                      | -1.2274 |
| TETRAHYDROPALMATINE                                        | 2934-97-6                            | -1.2259 |
| POMIFERIN                                                  | 572-03-2                             | -1.2255 |
| STRYCHNINE METHIODIDE                                      |                                      | -1.2213 |
| TOLPERISONE HYDROCHLORIDE                                  | 70312-00-4                           | -1.2145 |
| MELIBIOSE                                                  | 585-99-9                             | -1.2003 |
| FUSARIC ACID                                               | 536-69-6                             | -1.1941 |
| ROSOLIC ACID                                               | 603-45-2                             | -1.1920 |
| CLENBUTEROL HYDROCHLORIDE                                  | 21898-19-1                           | -1.1915 |
| BIOCHANIN A, 7-METHYL ETHER                                | 34086-51-6                           | -1.1879 |
| HYDROCORTISONE PHOSPHATE TRIETHYLAMINE SALT                | 3863-59-0 [cortisol 21-(dihydroxy)]  | -1.1780 |
| DESTHIOBIOTIN (+)                                          | 15720-25-9                           | -1.1768 |
| CITROPTEN                                                  | 487-06-9                             | -1.1764 |
| GEDUNOL                                                    |                                      | -1.1760 |
| DIMERCAPROL                                                | 59-52-9                              | -1.1758 |
| CLOPERASTINE HYDROCHLORIDE                                 | 3703-76-2                            | -1.1681 |
| IRIDIN                                                     | 491-74-7                             | -1.1664 |
| MYCOPHENOLATE MOFETIL                                      | 115007-34-6                          | -1.1440 |
| ISOPROTERENOL HYDROCHLORIDE                                | 51-30-9                              | -1.1387 |
| PHENYLBUZAZONE                                             | 50-33-9                              | -1.1360 |
| SINENSETIN                                                 | 2306-27-6                            | -1.1339 |
| IRIGENIN                                                   | 548-76-5                             | -1.1297 |
| DICYANDIAMIDE                                              | 461-58-5                             | -1.1236 |
| CAFFEIC ACID                                               | 331-39-5                             | -1.1219 |
| LORATADINE                                                 | 79794-75-5                           | -1.1186 |
| NORHARMAN                                                  | 244-63-3                             | -1.1130 |
| PHENYTOIN SODIUM                                           | 630-93-3, 57-41-0 [phenytoin]        | -1.1107 |
| GENISTEIN                                                  | 446-72-0                             | -1.1100 |
| ENALAPRIL MALEATE                                          | 76095-16-4, 75847-73-3 [enalapril]   | -1.1091 |
| BUFEXAMAC                                                  | 2438-72-4                            | -1.1063 |
| OBLIQUIN                                                   | 22161-48-4 [hydrate]                 | -1.1047 |
| JUGLONE                                                    | 481-39-0                             | -1.0969 |
| 3-HYDROXYFLAVONE                                           | 577-85-5                             | -1.0921 |
| AMIDOL DIHYDROCHLORIDE                                     | 137-09-7                             | -1.0892 |
| VINPOCETINE                                                | 42971-09-5                           | -1.0835 |
| 2,3-DIHYDROXY-6,7-DICHLOROQUINOXALINE                      |                                      | -1.0766 |
| AMITRIPTYLINE HYDROCHLORIDE                                | 549-18-8                             | -1.0752 |
| BRINZOLAMIDE                                               | 138890-62-7                          | -1.0743 |
| SIMVASTATIN                                                | 79902-63-9                           | -1.0732 |
| ADONITOL                                                   | 488-81-3                             | -1.0709 |
| DEXCHLORPHENIRAMINE MALEATE                                | 2438-32-6                            | -1.0668 |
| TRIMIPRAMINE MALEATE                                       | 521-78-8, 739-71-9 [trimipramine]    | -1.0631 |
| MAPROTILINE HYDROCHLORIDE                                  | 10347-81-6, 10262-69-8 [maprotiline] | -1.0591 |
| 13-METHYL-4,4-BISNOR-8,11,13-PODOCARPATRIEN-3-ONE          |                                      | -1.0572 |
| DEXTROMETHORPHAN HYDROBROMIDE                              | 6700-34-1, 125-69-9 [anhydrous]      | -1.0545 |
| MECLOFENAMATE SODIUM                                       | 6385-02-0                            | -1.0486 |
| SULINDAC                                                   | 38194-50-2                           | -1.0480 |
| PRASTERONE                                                 | 53-43-0                              | -1.0459 |

|                                      |             |         |
|--------------------------------------|-------------|---------|
| Pimethixene maleate                  | 13187-06-9  | -0.6356 |
| Avobenzene                           | 70356-09-1  | -0.6293 |
| Azithromycin                         | 83905-01-5  | -0.6284 |
| Drofenine hydrochloride              | 548-66-3    | -0.6180 |
| Aripiprazole                         | 129722-12-9 | -0.6178 |
| Pidotimod                            | 121808-62-6 | -0.6169 |
| Mirtazapine                          | 61337-67-5  | -0.6113 |
| Promazine hydrochloride              | 53-60-1     | -0.6106 |
| Formoterol fumarate                  | 43229-80-7  | -0.6086 |
| Risperidone                          | 106266-06-2 | -0.6054 |
| Etofenamate                          | 30544-47-9  | -0.6050 |
| Nimodipine                           | 66085-59-4  | -0.6040 |
| Amprenavir                           | 161814-49-9 | -0.6039 |
| Erlotinib                            | 183321-74-6 | -0.6019 |
| Imipramine hydrochloride             | 113-52-0    | -0.5961 |
| Imiquimod                            | 99011-02-6  | -0.5951 |
| Reserpine                            | 50-55-5     | -0.5948 |
| (-)-Isoproterenol hydrochloride      | 5984-95-2   | -0.5888 |
| Diflorasone Diacetate                | 33564-31-7  | -0.5888 |
| Isopyrin hydrochloride               | 18342-39-7  | -0.5852 |
| Carbarsone                           | 121-59-5    | -0.5826 |
| Cefprozil                            | 121123-17-9 | -0.5808 |
| Proguanil hydrochloride              | 637-32-1    | -0.5785 |
| Idebenone                            | 58186-27-9  | -0.5781 |
| Dipyridamole                         | 58-32-2     | -0.5750 |
| Methapyrilene hydrochloride          | 135-23-9    | -0.5707 |
| Nicotinamide                         | 98-92-0     | -0.5704 |
| Dexfenfluramine hydrochloride        | 3239-45-0   | -0.5608 |
| Budesonide                           | 51333-22-3  | -0.5589 |
| Amorolfine hydrochloride             | 78613-38-4  | -0.5576 |
| Flunisolide                          | 542449      | -0.5574 |
| Benzathine benzylpenicillin          | 5928-84-7   | -0.5554 |
| Diphenhydramine hydrochloride        | 147-24-0    | -0.5501 |
| Pempidine                            | 79-55-0     | -0.5482 |
| Entacapone                           | 130929-57-6 | -0.5415 |
| Spiramycin                           | 8025-81-8   | -0.5411 |
| N6-methyladenosine                   | 1867-73-8   | -0.5322 |
| Toremifene                           | 89778-26-7  | -0.5236 |
| Betamethasone                        | 378-44-9    | -0.5232 |
| Phenazopyridine hydrochloride        | 136-40-3    | -0.5198 |
| Pentobarbital                        | 76-74-4     | -0.5167 |
| (-) -Levobunolol hydrochloride       | 27912-14-7  | -0.5143 |
| Milnacipran hydrochloride            | 101152-94-7 | -0.5134 |
| Benzoxiquine                         | 86-75-9     | -0.5089 |
| Loteprednol etabonate                | 82034-46-6  | -0.5023 |
| Rimexolone                           | 49697-38-3  | -0.5008 |
| Gemifloxacin mesylate                | 175463-14-6 | -0.5001 |
| Topotecan                            | 123948-87-8 | -0.4995 |
| Ifenprodil tartrate                  | 23210-58-4  | -0.4994 |
| Amethopterin (R,S)                   | 60388-53-6  | -0.4870 |
| Alfacalcidol                         | 41294-56-8  | -0.4864 |
| Selegiline hydrochloride             | 14611-52-0  | -0.4826 |
| Cefdinir                             | 91832-40-5  | -0.4820 |
| Cyclopentolate hydrochloride         | 5870-29-1   | -0.4791 |
| Mifepristone                         | 84371-65-3  | -0.4790 |
| Amodiaquin dihydrochloride dihydrate | 6398-98-7   | -0.4773 |
| Oxacillin sodium                     | 1173-88-2   | -0.4759 |
| Methylodopate hydrochloride          | 2508-79-4   | -0.4757 |
| Alosetron hydrochloride              | 122852-69-1 | -0.4645 |
| Triclabendazole                      | 68786-66-3  | -0.4637 |
| Cyproterone acetate                  | 427-51-0    | -0.4607 |
| Nilutamide                           | 63612-50-0  | -0.4594 |
| Methanetheline bromide               | 53-46-3     | -0.4577 |
| Sulfadimethoxine                     | 122-11-2    | -0.4560 |
| Irbesartan                           | 138402-11-6 | -0.4554 |
| Trimebutine                          | 39133-31-8  | -0.4545 |
| Amoxapine                            | 14028-44-5  | -0.4531 |
| Acitretin                            | 55079-83-9  | -0.4463 |
| Procarbazine hydrochloride           | 366-70-1    | -0.4444 |
| Chlorpropamide                       | 94-20-2     | -0.4433 |
| Epiandrosterone                      | 481-29-8    | -0.4433 |
| Benazepril hydrochloride             | 86541-74-4  | -0.4385 |
| Ciclopirox ethanolamine              | 41621-49-2  | -0.4369 |
| Risedronic acid monohydrate          | 105462-24-6 | -0.4334 |
| Guanabenz acetate                    | 23256-50-0  | -0.4323 |
| Sulfachloropyridazine                | 80-32-0     | -0.4316 |
| Tiabendazole                         | 148-79-8    | -0.4276 |
| Loracarbef                           | 121961-22-6 | -0.4263 |
| Dimaprit dihydrochloride             | 23256-33-9  | -0.4260 |

|                                                         |                            |         |
|---------------------------------------------------------|----------------------------|---------|
| CLEMASTINE FUMARATE                                     | 14976-57-9, 15686-51-8 (ba | -1.0420 |
| SINAPIC ACID                                            | 530-59-6                   | -1.0392 |
| 4,6-DIMETHOXY-5-METHYLISOFLAVONE                        |                            | -1.0390 |
| ORSELLINIC ACID                                         | 480-64-8                   | -1.0361 |
| MEGESTROL ACETATE                                       | 595-33-5, 3562-63-8 [mege  | -1.0341 |
| TOTAROL-19-CARBOXYLIC ACID, METHYL ESTER                |                            | -1.0338 |
| EOVIXINE                                                | 522-11-2                   | -1.0303 |
| METAPROTERENOL                                          | 586-06-1, 5874-97-5 [metap | -1.0303 |
| 6,7-DICHLORO-3-HYDROXY-2-QUINOXALINECARBOXYLIC ACID     |                            | -1.0288 |
| BOLDINE                                                 | 476-70-0                   | -1.0223 |
| AZELASTINE HYDROCHLORIDE                                | 58581-89-8                 | -1.0218 |
| 4'-DEMETHYLEPICROPODOPHYLLOTOXIN                        |                            | -1.0194 |
| KITASAMYCINS [A1 shown]                                 | 1329-21-8                  | -1.0185 |
| CYPROTERONE ACETATE                                     | 427-51-0                   | -1.0171 |
| METHOCARBAMOL                                           | 532-03-6                   | -1.0169 |
| TROPINE                                                 | 120-29-6                   | -1.0163 |
| HYDROXYZINE PAMOATE                                     | 10246-75-0, 68-88-2 [hydro | -1.0113 |
| ANABASINE HYDROCHLORIDE                                 | 53912-89-3                 | -1.0092 |
| TERBUTALINE HEMISULFATE                                 | 23031-32-5                 | -1.0046 |
| 2,3,4-TRIHYDROXY-4'-ETHOXYBENZOPHENONE                  |                            | -1.0042 |
| PRAMOXINE HYDROCHLORIDE                                 | 637-58-1, 140-65-8 [pramo  | -1.0042 |
| CRUSTECDYSONE                                           | 5289-74-7                  | -1.0036 |
| ESTRONE ACETATE                                         | 901-93-9                   | -1.0028 |
| CLOXYQUIN                                               | 130-16-5                   | -1.0015 |
| NICERGOLINE                                             | 27848-84-6                 | -0.9977 |
| BRAZILEIN                                               | 600-76-0                   | -0.9937 |
| CAPSANTHIN                                              | 465-42-9                   | -0.9915 |
| SQUALENE thiourea clathrate                             | 111-02-4                   | -0.9907 |
| PIROCTONE OLAMINE                                       | 68890-66-4                 | -0.9862 |
| 7-HYDROXYFLAVONE                                        | 6665-86-7                  | -0.9833 |
| p-FLUOROPHENYLALANINE                                   | 51-65-0                    | -0.9794 |
| METOPROLOL TARTRATE                                     | 56392-17-7, 37350-58-6 [m  | -0.9770 |
| 3,7-DIHYDROXYFLAVONE                                    | 492-00-2                   | -0.9764 |
| GEFITINIB                                               | 184475-35-2                | -0.9728 |
| NIFLUMIC ACID                                           | 4394-00-7                  | -0.9689 |
| IMIDAZOL-4-YLACETIC ACID SODIUM SALT                    | 56368-58-2                 | -0.9669 |
| PENTAMIDINE ISETHIONATE                                 | 100-33-4                   | -0.9662 |
| 2-ACETAMIDOFLOURENE                                     | 53-96-3                    | -0.9649 |
| AMPYRONE                                                | 83-07-8                    | -0.9649 |
| AMINOETHOXYDIPHENYLBORANE                               | 524-95-8                   | -0.9648 |
| TANSHINONE IIA                                          | 568-72-9                   | -0.9623 |
| LUPEOL ACETATE                                          | 1617-68-1                  | -0.9523 |
| o-VERATRALDEHYDE                                        | 86-51-1                    | -0.9510 |
| ITOPRIDE HYDROCHLORIDE                                  | 122898-67-3                | -0.9502 |
| VARDENAFIL HYDROCHLORIDE                                | 224789-15-5                | -0.9500 |
| CINNARAZINE                                             | 298-57-7                   | -0.9497 |
| POMIFERIN TRIACETATE                                    |                            | -0.9481 |
| PREDNISOLONE ACETATE                                    | 52-21-1                    | -0.9421 |
| 2',4'-DIHYDROXY-6'-METHOXYACETOPHENONE                  | 3602-54-8                  | -0.9388 |
| HYDROCORTISONE                                          | 50-23-7                    | -0.9339 |
| 5-AMINOPENTANOIC ACID HYDROCHLORIDE                     |                            | -0.9333 |
| METHYLBENZETHONIUM CHLORIDE                             | 1320-44-1, 25155-18-4 [anf | -0.9329 |
| PROGESTERONE                                            | 57-83-0                    | -0.9307 |
| SMILAGENIN ACETATE                                      |                            | -0.9297 |
| DEFLAZACORT                                             | 14484-47-0                 | -0.9234 |
| TRAMIPROSATE                                            | 3687-18-1                  | -0.9230 |
| AMODIAQUINE DIHYDROCHLORIDE                             | 6398-98-7, 69-44-3 [anhydr | -0.9202 |
| TROPICAMIDE                                             | 1508-75-4                  | -0.9188 |
| AMINOCYCLOPROPANECARBOXYLIC ACID                        | 68781-13-5                 | -0.9167 |
| 2',5'-DIHYDROXY-4-METHOXYCHALCONE                       | 6342-92-3                  | -0.9117 |
| ANDROSTERONE ACETATE                                    | 1164-95-0                  | -0.9070 |
| NYSTATIN                                                | 114-90-9                   | -0.9050 |
| BUMETANIDE                                              | 28395-03-1                 | -0.9043 |
| 3beta-ACETOXY-23-BROMO-ISOALLOSPIROST-9 (11)-ENE-12-ONE |                            | -0.9031 |
| 2-MERCAPTOETHANOL                                       | 60-24-2                    | -0.9023 |
| MUNDOSERONE                                             | 3564-85-0                  | -0.9004 |
| DUARTIN (-)                                             | 52305-04-1                 | -0.8999 |
| CRYPTOTANSHINONE                                        | 35825-57-1                 | -0.8989 |
| DEQUALINIUM CHLORIDE                                    | 522-51-0                   | -0.8979 |
| ANDROSTA-1,4-DIEN-3,17-DIONE                            | 897-06-3                   | -0.8961 |
| BITOSCANATE                                             | 4044-65-9                  | -0.8961 |
| PERSEITOL                                               | 527-06-0                   | -0.8924 |
| p-ANISIC ACID                                           | 100-09-4                   | -0.8919 |
| METHIMAZOLE                                             | 60-56-0                    | -0.8892 |
| CRESOPIRINE                                             | 4386-39-4                  | -0.8885 |
| METHIONINE SULFOXIMINE (L)                              | 15985-39-4                 | -0.8881 |
| PYRIMETHAMINE                                           | 58-14-0                    | -0.8822 |
| HEXYLRESORCINOL                                         | 136-77-6                   | -0.8820 |
| BUPIVACAINE HYDROCHLORIDE                               | 14252-80-3                 | -0.8797 |



|                                      |             |         |
|--------------------------------------|-------------|---------|
| Furaltadone hydrochloride            | 3759-92-0   | -0.4222 |
| Nizatidine                           | 76963-41-2  | -0.4214 |
| Sulfamethoxyypyridazine              | 80-35-3     | -0.4214 |
| Pemetrexed disodium                  | 357166-30-4 | -0.4201 |
| Avermectin B1                        | 71751-41-2  | -0.4194 |
| Quinethazone                         | 73-49-4     | -0.4194 |
| Triflupromazine hydrochloride        | 1098-60-8   | -0.4189 |
| Idazoxan hydrochloride               | 79944-56-2  | -0.4157 |
| Procainamide hydrochloride           | 614-39-1    | -0.4139 |
| Indinavir sulfate                    | 157810-81-6 | -0.4072 |
| Doxofylline                          | 69975-86-6  | -0.4050 |
| Nomegestrol acetate                  | 58652-20-3  | -0.4011 |
| Roxithromycin                        | 80214-83-1  | -0.4004 |
| Theobromine                          | 83-67-0     | -0.4000 |
| Levetiracetam                        | 102767-28-2 | -0.3978 |
| Flucytosine                          | 2022-85-7   | -0.3956 |
| Biperiden hydrochloride              | 1235-82-1   | -0.3932 |
| Floxuridine                          | 50-91-9     | -0.3917 |
| Paromomycin sulfate                  | 1263-89-4   | -0.3915 |
| Deferoxamine mesylate                | 138-14-7    | -0.3870 |
| Pregabalin                           | 148553-50-8 | -0.3852 |
| Hydroxychloroquine sulfate           | 747-36-4    | -0.3826 |
| Aceclidine Hydrochloride             | 6109-70-2   | -0.3809 |
| Ibandronate sodium                   | 114084-78-5 | -0.3807 |
| Ketoconazole                         | 65277-42-1  | -0.3797 |
| Isosorbide dinitrate                 | 87-33-2     | -0.3779 |
| Flucinonide                          | 356-12-7    | -0.3745 |
| Cefepime hydrochloride               | 123171-59-5 | -0.3730 |
| Methicillin sodium                   | 7246-14-2   | -0.3709 |
| Cephalosporanic acid, 7-amino        | 957-68-6    | -0.3643 |
| Azaperone                            | 1649-18-9   | -0.3640 |
| Clebopride maleate                   | 84370-95-6  | -0.3634 |
| N-Acetyl-DL-homocysteine Thiolactone | 1195-16-0   | -0.3626 |
| Sulfameter                           | 651-06-9    | -0.3624 |
| Nitrendipine                         | 39562-70-4  | -0.3587 |
| Xylazine                             | 7361-61-7   | -0.3585 |
| Beta-Escin                           | 11072-93-8  | -0.3541 |
| Doxylamine succinate                 | 562-10-7    | -0.3522 |
| Meclofenoxate hydrochloride          | 3685-84-5   | -0.3468 |
| Nafronyl oxalate                     | 474972      | -0.3467 |
| Etoricoxib                           | 202409-33-4 | -0.3436 |
| Ondansetron Hydrochloride            | 103639-04-9 | -0.3433 |
| Dequalinium dichloride               | 522-51-0    | -0.3422 |
| Alfuzosin hydrochloride              | 81403-68-1  | -0.3420 |
| Propoxycaine hydrochloride           | 550-83-4    | -0.3385 |
| Pivmecillinam hydrochloride          | 32887-03-9  | -0.3384 |
| Crotamiton                           | 483-63-6    | -0.3369 |
| Aminohippuric acid                   | 61-78-9     | -0.3355 |
| Bromhexine hydrochloride             | 611-75-6    | -0.3312 |
| Calcipotriene                        | 112965-21-6 | -0.3300 |
| Tranilast                            | 53902-12-8  | -0.3271 |
| Bromopride                           | 4093-35-0   | -0.3234 |
| Nifedipine                           | 21829-25-4  | -0.3222 |
| Dirithromycin                        | 62013-04-1  | -0.3195 |
| Dexrazoxane hydrochloride            | 24584-09-6  | -0.3178 |
| Chlorpromazine hydrochloride         | 69-09-0     | -0.3171 |
| Carbinoxamine maleate salt           | 3505-38-2   | -0.3147 |
| Cefpiramide                          | 70797-11-4  | -0.3147 |
| Bacampicillin hydrochloride          | 37661-08-8  | -0.3137 |
| Azatadine maleate                    | 3978-86-7   | -0.3130 |
| Clorsulon                            | 60200-06-8  | -0.3119 |
| Tridihexethyl chloride               | 4310-35-4   | -0.3098 |
| Clavulanate potassium salt           | 58001-44-8  | -0.3062 |
| Phenethicillin potassium salt        | 132-93-4    | -0.3032 |
| Ceftibuten                           | 97519-39-6  | -0.3001 |
| Flecainide acetate                   | 54143-56-5  | -0.2997 |
| Fluconazole                          | 86386-73-4  | -0.2967 |
| Ubenimex                             | 58970-76-6  | -0.2954 |
| Donepezil hydrochloride              | 120011-70-3 | -0.2948 |
| Iopromide                            | 73334-07-3  | -0.2947 |
| Guanethidine sulfate                 | 60-02-6     | -0.2915 |
| Fenoterol hydrobromide               | 16409       | -0.2846 |
| Equilin                              | 474-86-2    | -0.2840 |
| Halcinonide                          | 3093-35-4   | -0.2832 |
| Piribedil hydrochloride              | 78213-63-5  | -0.2794 |
| Dipyron                              | 5907-38-0   | -0.2692 |
| Vecuronium bromide                   | 50700-72-6  | -0.2685 |
| Cefmetazole sodium salt              | 56796-39-5  | -0.2684 |
| Pentamidine isethionate              | 140-64-7    | -0.2684 |

|                                              |                             |         |
|----------------------------------------------|-----------------------------|---------|
| PROLINE (L)                                  | 147-85-3                    | -0.8788 |
| BETAMETHASONE 17,21-DIPROPIONATE             | 5593-20-4                   | -0.8780 |
| MUCIC ACID                                   | 526-99-8                    | -0.8780 |
| TOLMETIN SODIUM                              | 64490-92-2, 26171-23-3 [to  | -0.8780 |
| MIFEPRISTONE                                 | 84371-65-3                  | -0.8734 |
| REBAMIPIDE                                   | 90098-04-7                  | -0.8688 |
| CITRULLINE                                   | 627-77-0                    | -0.8672 |
| WARFARIN                                     | 81-81-2                     | -0.8644 |
| OLMESARTAN                                   | 144689-24-7                 | -0.8589 |
| 3-ACETAMIDOCOUMARIN                          | 779-30-6                    | -0.8560 |
| TOREMIFENE CITRATE                           | 89778-27-8                  | -0.8559 |
| 2'-HYDROXYCHALCONE                           | 1214-47-7                   | -0.8559 |
| N-METHYLANTHRANILIC ACID                     | 119-68-6                    | -0.8549 |
| CYCLOCREATINE                                | 35404-50-3                  | -0.8525 |
| BETULIN                                      | 473-98-3                    | -0.8524 |
| CEFALONIUM                                   | 5575-21-3                   | -0.8512 |
| ADELMIDROL                                   | 1675-66-7                   | -0.8459 |
| ANHYDROBRAZILIC ACID                         |                             | -0.8459 |
| PENTOLINIUM TARTRATE                         | 52-62-0, 144-44-5 [pentolin | -0.8450 |
| CHRYSIN DIMETHYL ETHER                       | 21392-57-4                  | -0.8435 |
| alpha-LAPACHONE                              | 4707-33-9                   | -0.8428 |
| BUCETIN                                      | 1083-57-4                   | -0.8410 |
| AVOCADENOFURAN                               | 25346-24-1                  | -0.8404 |
| DIPHENYLPYRALINE HYDROCHLORIDE               | 132-18-3 147-20-6 [dipheny  | -0.8385 |
| SISOMICIN SULFATE                            | 32385-11-8                  | -0.8378 |
| POSACONAZOLE                                 | 171228-49-2                 | -0.8375 |
| KHELLIN                                      | 82-02-0                     | -0.8314 |
| MEPENZOLATE BROMIDE                          | 76-90-4, 25990-43-6 [mepe   | -0.8302 |
| MANGOSTIN TRIMETHYL ETHER                    |                             | -0.8287 |
| EXALAMIDE                                    | 53370-90-4                  | -0.8277 |
| ALIZARIN                                     | 72-48-0                     | -0.8224 |
| METHOXYAMINE HYDROCHLORIDE                   | 593-56-6                    | -0.8220 |
| TIGOGENIN                                    | 77-60-1                     | -0.8205 |
| 3beta-HYDROXYCHOL-5-ENIC ACID                | 5255-17-4                   | -0.8196 |
| PARAXANTHINE                                 | 611-59-6                    | -0.8190 |
| TAMOXIFEN CITRATE                            | 54965-24-1, 10540-29-1 [ta  | -0.8170 |
| 1,2alpha-EPOXYDEACETOXYDIHYDROGEDUNIN        |                             | -0.8157 |
| PHENYL AMINOSALICYLATE                       | 133-11-9                    | -0.8148 |
| AMINOETHYLISOTHIOUREA DIHYDROBROMI           | 56-10-0                     | -0.8144 |
| CLARITHROMYCIN                               | 81103-11-9                  | -0.8132 |
| DEOXYGEDUNIN                                 | 21963-95-1                  | -0.8112 |
| MEROGEDUNIN                                  |                             | -0.8108 |
| PIPERIDOLATE HYDROCHLORIDE                   | 129-77-1, 82-98-4 [piperido | -0.8032 |
| SOLANESOL                                    | 13190-97-1                  | -0.7995 |
| GALANTAMINE                                  | 357-70-0, 1953-04-4 [hydro  | -0.7979 |
| 1-HYDROXY-3,6,7-TRIMETHOXY-2,8-DIPRENY       | 15404-76-9                  | -0.7975 |
| RACECADOTRIL                                 | 81110-73-8                  | -0.7930 |
| NITRENDIPINE                                 | 84845-75-0                  | -0.7923 |
| COLFORSIN                                    | 66575-29-9                  | -0.7923 |
| SULFLURAMID                                  | 4151-50-2                   | -0.7895 |
|                                              |                             | -0.7863 |
| LAWSONE                                      | 83-72-7                     | -0.7860 |
| METHENAMINE                                  | 100-97-0                    | -0.7851 |
| PREDNISONE                                   | 53-03-2                     | -0.7848 |
| AVANAFIL                                     | 330784-47-9                 | -0.7842 |
| PIDOTIMOD                                    | 121808-62-6                 | -0.7816 |
| BENZYL NICOTINATE                            | 94-44-0                     | -0.7808 |
| METHYL 7-DESHYDROXYPYROGALLIN-4-CARI         | 77-41-8                     | -0.7793 |
| PROPAFENONE HYDROCHLORIDE                    | 34183-22-7, 54063-53-5 [pr  | -0.7774 |
| BENZOHYDROXAMIC ACID                         | 495-18-1                    | -0.7756 |
| TROLOX                                       | 53188-07-1                  | -0.7752 |
| AVOCADENE                                    | 24607-08-7                  | -0.7745 |
| 4-METHOXYDALBERGIONE                         | 4646-86-0                   | -0.7739 |
| 1,7-DIDEACETOXY-1,7-DIOXO-3-DEACETYLKHIVORIN |                             | -0.7729 |
| 5,7,4'-TRIMETHOXYFLAVONE                     | 5631-70-9                   | -0.7711 |
| LOFEXIDINE HYDROCHLORIDE                     | 21498-08-8                  | -0.7709 |
| ABACAVIR SULFATE                             | 188062-50-2                 | -0.7684 |
| beta-CAROTENE [2mM]                          | 7235-40-7                   | -0.7634 |
| LANSOPRAZOLE                                 | 103577-45-3                 | -0.7629 |
| SULFACHLORPYRIDAZINE                         | 80-32-0                     | -0.7625 |
| LARIXINIC ACID                               | 118-71-8                    | -0.7599 |
| 5,4'-DIMETHOXY-7-HYDROXYISOFLAVONE           | 68939-22-0                  | -0.7597 |
| PYROGALLIN                                   |                             | -0.7591 |
| DEXAMETHASONE                                | 50-02-2                     | -0.7588 |
| 2',4'-DIHYDROXYCHALCONE 4'-GLUCOSIDE         |                             | -0.7558 |
| TANSHINONE IIA SULFONATE SODIUM              |                             | -0.7546 |
| CHOLEST-5-EN-3-ONE                           | 601-54-7                    | -0.7534 |
| BRIVUDINE                                    | 69304-47-8                  | -0.7533 |
| METHYLDOPA                                   | 41372-08-1                  | -0.7532 |

|                                               |               |         |
|-----------------------------------------------|---------------|---------|
| Articaine hydrochloride                       | 23964-57-0    | -0.2675 |
| Ibudilast                                     | 50847-11-5    | -0.2657 |
| Ronidazole                                    | 7681-76-7     | -0.2646 |
| Alprenolol hydrochloride                      | 13707-88-5    | -0.2630 |
| Dibenzepine hydrochloride                     | 315-80-0      | -0.2614 |
| Thiamine hydrochloride                        | 67-03-8       | -0.2604 |
| Olanzapine                                    | 132539-06-1   | -0.2599 |
| Fentiazac                                     | 18046-21-4    | -0.2569 |
| Gestrinone                                    | 16320-04-0    | -0.2565 |
| Phenprobamate                                 | 673-31-4      | -0.2553 |
| Rizatriptan benzoate                          | 145202-66-0   | -0.2545 |
| Enalaprilat dihydrate                         | 84680-54-6    | -0.2506 |
| Methylhydantoin-5-(D)                         | 55147-68-7    | -0.2480 |
| Tramadol hydrochloride                        | 27203-92-5    | -0.2471 |
| Lacidipine                                    | 103890-78-4   | -0.2469 |
| Itopride                                      | 122898-67-3   | -0.2467 |
| Pindolol                                      | 13523-86-9    | -0.2430 |
| Butalbital                                    | 77-26-9       | -0.2408 |
| Troxipide                                     | 99777-81-8    | -0.2406 |
| Carbetapentane citrate                        | 23142-01-0    | -0.2406 |
| Flucinolone acetonide                         | 67-73-2       | -0.2403 |
| Trimetozine                                   | 635-41-6      | -0.2335 |
| Fomepizole                                    | 7554-65-6     | -0.2331 |
| Metaproterenol sulfate, orciprenaline sulfate | 5874-97-5     | -0.2330 |
| Azacytidine-5                                 | 320-67-2      | -0.2320 |
| Cefaclor hydrate                              | 70356-03-5    | -0.2316 |
| Fenoldopam                                    | 67227-56-9    | -0.2309 |
| Moclobemide                                   | 71320-77-9    | -0.2309 |
| Methacholine chloride                         | 62-51-1       | -0.2286 |
| Ethinylestradiol                              | 57-63-6       | -0.2278 |
| Alclometasone dipropionate                    | 66734-13-2    | -0.2248 |
| Clobetasol propionate                         | 25122-46-7    | -0.2196 |
| Corticosterone                                | 50-22-6       | -0.2186 |
| Chlorthalidone                                | 77-36-1       | -0.2172 |
| Ipriflavone                                   | 35212-22-7    | -0.2168 |
| Dorzolamide hydrochloride                     | 130693-82-2   | -0.2156 |
| Folic acid                                    | 59-30-3       | -0.2136 |
| Rivastigmine                                  | 123441-03-2   | -0.2134 |
| Clofibric acid                                | 882-09-7      | -0.2110 |
| Bacitracin                                    | 1405-87-4     | -0.2103 |
| Nicergoline                                   | not available | -0.2060 |
| Naloxone hydrochloride                        | 357-08-4      | -0.2022 |
| Etilefrine hydrochloride                      | 534-87-2      | -0.2019 |
| Estradiol-17 beta                             | 50-28-2       | -0.2006 |
| 5-fluorouracil                                | 51-21-8       | -0.1968 |
| (S)-(-)-Atenolol                              | 93379-54-5    | -0.1965 |
| Proparacaine hydrochloride                    | 1452000       | -0.1947 |
| Tracazolate hydrochloride                     | 41094-88-6    | -0.1921 |
| Benserazide hydrochloride                     | 14919-77-8    | -0.1887 |
| Propantheline bromide                         | 50-34-0       | -0.1886 |
| Xamoterol hemifumarate                        | 73210-73-8    | -0.1871 |
| Pantoprazole sodium                           | 138786-67-1   | -0.1866 |
| Flumethasone pivalate                         | 2002-29-1     | -0.1811 |
| Meglumine                                     | 6284-40-8     | -0.1782 |
| Nefopam hydrochloride                         | 23327-57-3    | -0.1782 |
| Tinidazole                                    | 19387-91-8    | -0.1739 |
| Isopropamide iodide                           | 71-81-8       | -0.1735 |
| Urosiol                                       | 128-13-2      | -0.1712 |
| Phentermine hydrochloride                     | 1197-21-3     | -0.1698 |
| Dobutamine hydrochloride                      | 49745-95-1    | -0.1617 |
| Clocortolone pivalate                         | 34097-16-0    | -0.1600 |
| Cloпамide                                     | 636-54-4      | -0.1585 |
| Biotin                                        | 58-85-5       | -0.1578 |
| Methyldopa (L,-)                              | 555-30-6      | -0.1557 |
| Enrofloxacin                                  | 93106-60-6    | -0.1555 |
| Nafcillin sodium salt monohydrate             | 7177-50-6     | -0.1538 |
| Anastrozole                                   | 120511-73-1   | -0.1529 |
| Denatonium benzoate                           | 3734-33-6     | -0.1502 |
| Hesperidin                                    | 520-26-3      | -0.1484 |
| Carbidopa                                     | 28860-95-9    | -0.1434 |
| Salbutamol                                    | 18559-94-9    | -0.1424 |
| Pridinol methanesulfonate salt                | 6856-31-1     | -0.1423 |
| Anagrelide                                    | 68475-42-3    | -0.1406 |
| Zidovudine, AZT                               | 30516-87-1    | -0.1400 |
| Betaxolol hydrochloride                       | 63659-19-8    | -0.1397 |
| Benzethonium chloride                         | 121-54-0      | -0.1379 |
| Ampiroxicam                                   | 99464-64-9    | -0.1372 |
| Methacycline hydrochloride                    | 3963-95-9     | -0.1357 |
| Exemestane                                    | 107868-30-4   | -0.1341 |

|                                  |                                        |         |
|----------------------------------|----------------------------------------|---------|
| NOBILETIN                        | 478-01-3                               | -0.7525 |
| 3,4'-DIMETHOXYFLAVONE            |                                        | -0.7520 |
| HYDROCORTISONE ACETATE           | 50-03-3                                | -0.7494 |
| CHLORANIL                        | 118-75-2                               | -0.7482 |
| CLIOQUINOL                       | 130-26-7                               | -0.7473 |
| IDEBENONE                        | 58186-27-9                             | -0.7457 |
| BETAMETHASONE                    | 378-44-9                               | -0.7454 |
| HUPERZINE A                      | 102518-79-6                            | -0.7438 |
| ERYTHROMYCIN ESTOLATE            | 134-36-1, 114-07-8 [erythroc]          | -0.7414 |
| MEDROXYPROGESTERONE ACETATE      | 71-58-9, 520-85-4 [medroxy]            | -0.7396 |
| BENZOIC ACID                     | 65-85-0                                | -0.7382 |
| RITODRINE HYDROCHLORIDE          | 23239-51-2, 26652-09-5 [ritodrine]     | -0.7367 |
| LEUCODIN                         | 17946-87-1                             | -0.7358 |
| PIPERIC ACID                     | 5285-18-7                              | -0.7303 |
| BROXALDINE                       | 3684-48-6                              | -0.7291 |
| CYCLOLEUCINE                     | 52-52-8                                | -0.7253 |
| L-BUTHIONINE SULFOXIMINE         | 83730-53-4                             | -0.7246 |
| NIMODIPINE                       | 66085-59-4                             | -0.7236 |
| L-CYSTINE                        | 56-89-3                                | -0.7194 |
| ISOXSUPRINE HYDROCHLORIDE        | 579-56-6, 395-28-8 [isoxsuprine]       | -0.7188 |
| CYCLOPHOSPHAMIDE                 | 6055-19-2                              | -0.7179 |
| PROPRANOLOL HYDROCHLORIDE (+/-)  | 318-98-9                               | -0.7179 |
| 5-FLUOROINDOLE-2-CARBOXYLIC ACID | 399-76-8                               | -0.7178 |
| QUINALIZARIN                     | 81-61-8                                | -0.7178 |
| BUTOPYRONOXYL                    | 532-34-3                               | -0.7166 |
| CHLOROGENIC ACID                 | 327-97-9                               | -0.7132 |
| CANAGLIFLOZIN                    | 928672-86-0                            | -0.7128 |
| DIPYRIDAMOLE                     | 58-32-2                                | -0.7086 |
| METOCLOPRAMIDE HYDROCHLORIDE     | 54143-57-6                             | -0.7082 |
| XANTHOPTERIN                     | 119-44-8                               | -0.7072 |
| DEACETYLGEDUNIN                  |                                        | -0.7070 |
| NIFURSOL                         | 16915-70-1                             | -0.7059 |
| 7-NITROINDAZOLE                  | 2942-42-9                              | -0.7054 |
| SUBERIC ACID                     | 505-48-6                               | -0.7040 |
| MYRICETIN                        | 529-44-2                               | -0.7030 |
| INDOLE-2-CARBOXYLIC ACID         | 1477-50-5                              | -0.6930 |
| NORGESTREL                       | 6533-00-2                              | -0.6916 |
| OLEANOLIC ACID ACETATE           | 4339-72-4                              | -0.6916 |
| METHOXAMINE HYDROCHLORIDE        | 61-16-5, 390-28-3 [methoxamine]        | -0.6897 |
| ARBUTIN                          | 497-76-7                               | -0.6886 |
| N-ACETYLPROLINE (dl)             |                                        | -0.6883 |
| TRIAMCINOLONE DIACETATE          | 67-78-7                                | -0.6826 |
| GYROMITRIN                       | 16568-02-8                             | -0.6825 |
| CARAPIN                          | 3463-88-5                              | -0.6815 |
| LEVODOPA                         | 59-92-7                                | -0.6813 |
| METHACHOLINE CHLORIDE            | 62-51-1, 55-92-5 [methacholine]        | -0.6803 |
| PIPERONYLIC ACID                 | 94-53-1                                | -0.6795 |
| SALICIN                          | 138-52-3                               | -0.6792 |
| ARPRINOCID                       | 55779-18-5                             | -0.6790 |
| SERATRODAST                      | 112665-43-7                            | -0.6776 |
| METHOXSALEN                      | 298-81-7                               | -0.6774 |
| PHENOLSULFONPHTHALEIN            | 143-74-8                               | -0.6767 |
| TIGECYCLINE                      | 220620-09-7                            | -0.6740 |
| HAEMATOPORPHYRIN                 | 14459-29-1                             | -0.6730 |
| QUERCITRIN                       | 522-12-3                               | -0.6681 |
| DEHYDRODIHYDROROTENONE           | 6659-45-6                              | -0.6673 |
| ETOSALAMIDE                      | 15302-15-5                             | -0.6671 |
| CHLOROTHALONIL                   | 1897-45-6                              | -0.6662 |
| APIGENIN                         | 520-36-5                               | -0.6662 |
| AVOCATIN A                       |                                        | -0.6647 |
| LINCOMYCIN HYDROCHLORIDE         | 7179-49-9                              | -0.6647 |
| UREA                             | 57-13-6                                | -0.6639 |
| SULFANILIC ACID                  | 121-57-3                               | -0.6636 |
| FLUCONAZOLE                      | 86386-73-4                             | -0.6623 |
| PURPURIN                         | 81-54-9                                | -0.6611 |
| DEFERIPRONE                      | 30652-11-0                             | -0.6600 |
| 4-METHOXY-4'-HYDROXY-DALBERGIONE |                                        | -0.6593 |
| FRIEDELIN                        | 559-74-0                               | -0.6579 |
| CHLOROXINE                       | 773-76-2                               | -0.6554 |
| TRIAMTERENE                      | 396-01-0                               | -0.6527 |
| AMPROLIUM                        | 121-25-5                               | -0.6526 |
| DIHYDROERGOTAMINE MESYLATE       | 6190-39-2                              | -0.6478 |
| OXYCLOZANIDE                     | 2277-92-1                              | -0.6472 |
| EPINEPHRINE BITARTRATE           | 51-42-3                                | -0.6472 |
| OXYMATRINE                       | 16837-52-8                             | -0.6465 |
| AZITHROMYCIN                     | 83905-01-5, 117772-70-0 [azithromycin] | -0.6455 |
| PINDOLOL                         | 13523-86-9                             | -0.6452 |
| KHIVORIN                         | 2524-38-1                              | -0.6451 |
| CYCLOPENTOLATE HYDROCHLORIDE     | 5870-29-1, 512-15-2 [cyclopentolate]   | -0.6437 |

|                                   |             |         |
|-----------------------------------|-------------|---------|
| Fexofenadine hydrochloride        | 153439-40-8 | -0.1313 |
| Deoxycorticosterone               | 64-85-7     | -0.1289 |
| Mesalamine                        | 89-57-6     | -0.1265 |
| Zileuton                          | 111406-87-2 | -0.1243 |
| Famciclovir                       | 104227-87-4 | -0.1241 |
| Felodipine                        | 72509-76-3  | -0.1148 |
| Histamine dihydrochloride         | 56-92-8     | -0.1130 |
| Gliclazide                        | 21187-98-4  | -0.1126 |
| Hymecromone                       | 90-33-5     | -0.1101 |
| Dihydrostreptomycin sulfate       | 5490-27-7   | -0.1070 |
| Ramipril                          | 87333-19-5  | -0.1020 |
| Amiloride hydrochloride dihydrate | 17440-83-4  | -0.0998 |
| Repaglinide                       | 135062-02-1 | -0.0981 |
| Racecadotril                      | 81110-73-8  | -0.0966 |
| Bisoprolol fumarate               | 104344-23-2 | -0.0958 |
| Alizapride hydrochloride          | 59338-87-3  | -0.0934 |
| Hemicholinium bromide             | 312-45-8    | -0.0899 |
| Amiprilose hydrochloride          | 60414-06-4  | -0.0876 |
| Labetalol hydrochloride           | 32780-64-6  | -0.0826 |
| Celecoxib                         | 169590-42-5 | -0.0816 |
| Cefuroxime axetil                 | 64544-07-6  | -0.0792 |
| Zoxazolamine                      | 61-80-3     | -0.0791 |
| Minocycline hydrochloride         | 13614-98-7  | -0.0787 |
| Althiazide                        | 5588-16-9   | -0.0784 |
| Amisulpride                       | 71675-85-9  | -0.0777 |
| Rofecoxib                         | 162011-90-7 | -0.0748 |
| Nilvadipine                       | 75530-68-6  | -0.0714 |
| Bephenium hydroxynaphthoate       | 3818-50-6   | -0.0712 |
| Candesartan                       | 139481-59-7 | -0.0712 |
| Oxethazaine                       | 126-27-2    | -0.0711 |
| Zomepirac sodium salt             | 64092-48-4  | -0.0704 |
| Oxaprozin                         | 21256-18-8  | -0.0688 |
| Rosiglitazone Hydrochloride       | 122320-73-4 | -0.0680 |
| Acenocoumarol                     | 152-72-7    | -0.0671 |
| Amphotericin B                    | 1397-89-3   | -0.0666 |
| Latanoprost                       | 145773-22-4 | -0.0661 |
| Etanidazole                       | 22668-01-5  | -0.0657 |
| Ciclesonide                       | 126544-47-6 | -0.0649 |
| Thiorphan                         | 76721-89-6  | -0.0607 |
| Telenzepine dihydrochloride       | 147416-96-4 | -0.0599 |
| Haloprogyn                        | 777-11-7    | -0.0595 |
| Sulfanilamide                     | 63-74-1     | -0.0589 |
| Debrisoquin sulfate               | 581-88-4    | -0.0582 |
| Phthalylsulfathiazole             | 85-73-4     | -0.0562 |
| Zaleplon                          | 151319-34-5 | -0.0554 |
| Amifostine                        | 20537-88-6  | -0.0547 |
| Vidarabine                        | 5536-17-4   | -0.0541 |
| Penciclovir                       | 39809-25-1  | -0.0532 |
| Ciprofibrate                      | 52214-84-3  | -0.0527 |
| Mepivacaine hydrochloride         | 1722-62-9   | -0.0430 |
| Tazarotene                        | 118292-40-3 | -0.0357 |
| Isoxsuprine hydrochloride         | 579-56-6    | -0.0355 |
| Cilostazol                        | 73963-72-1  | -0.0332 |
| Felbamate                         | 25451-15-4  | -0.0332 |
| Cefoxitin sodium salt             | 33564-30-6  | -0.0332 |
| Lodoxamide                        | 53882-12-5  | -0.0331 |
| Mepenzolate bromide               | 76-90-4     | -0.0307 |
| Anethole-trithione                | 532-11-6    | -0.0258 |
| Oxybenzone                        | 131-57-7    | -0.0256 |
| Bezafibrate                       | 41859-67-0  | -0.0231 |
| Clidinium bromide                 | 3485-62-9   | -0.0231 |
| Cetirizine dihydrochloride        | 83881-52-1  | -0.0230 |
| Cisapride                         | 81098-60-4  | -0.0227 |
| Flurbiprofen                      | 5104-49-4   | -0.0149 |
| Chloropyramine hydrochloride      | 6170-42-9   | -0.0113 |
| Nisoldipine                       | 63675-72-9  | -0.0086 |
| Dacarbazine                       | 891986      | -0.0083 |
| (R)-(+)-Atenolol                  | 56715-13-0  | -0.0075 |
| Quinapril hydrochloride           | 82586-55-8  | -0.0060 |
| Grepafloxacin                     | 146863-02-7 | -0.0059 |
| Felbinac                          | 5728-52-9   | -0.0042 |
| Loxapine succinate                | 27833-64-3  | 0.0001  |
| Fleroxacin                        | 79660-72-3  | 0.0002  |
| Anthralin                         | 1143-38-0   | 0.0009  |
| Ethynylestradiol 3-methyl ether   | 72-33-3     | 0.0027  |
| Toltrazuril                       | 69004-03-1  | 0.0036  |
| Dioxybenzone                      | 131-53-3    | 0.0045  |
| (-)-Emtricitabine                 | 143491-57-0 | 0.0074  |
| Ampicillin trihydrate             | 7177-48-2   | 0.0081  |

|                                       |                              |         |
|---------------------------------------|------------------------------|---------|
| BROMPHENIRAMINE MALEATE               | 980-71-2, 86-22-6 [bromph    | -0.6417 |
| TOLVAPTAN                             | 150683-30-0                  | -0.6410 |
| DOXEPIN HYDROCHLORIDE                 | 1229-29-4, 1668-19-5 [doxe   | -0.6405 |
| CYCLOPAMINE                           | 4449-51-8                    | -0.6393 |
| ESTRADIOL                             | 50-28-2                      | -0.6366 |
| MEDRYSONE                             | 2668-66-8                    | -0.6361 |
| NINHYDRIN                             | 485-47-2                     | -0.6358 |
| OFLOXACIN                             | 82419-36-1 (acid)            | -0.6353 |
| 5-METHYLHYDANTOIN                     | 616-03-5                     | -0.6318 |
| CHLORPHENIRAMINE MALEATE              | 113-92-8                     | -0.6296 |
| PHENYLALANINE (L) HYDROCHLORIDE       | 63-91-2                      | -0.6294 |
| NEFOPAM                               | 23327-57-3, 13669-70-0 [ne   | -0.6273 |
| ESTRADIOL METHYL ETHER                | 1035-77-4                    | -0.6266 |
| BROXYQUINOLINE                        | 521-74-4                     | -0.6250 |
| OXYMETAZOLINE HYDROCHLORIDE           | 2315-02-8, 1491-59-4 [oxyn   | -0.6250 |
| DIALLYL TRISULFIDE                    | 2050-87-5                    | -0.6234 |
| DAPSONE                               | 80-08-0                      | -0.6223 |
| LUPININE                              | 486-70-4                     | -0.6199 |
| PROPARACAINE HYDROCHLORIDE            | 575-06-98                    | -0.6149 |
| GLICLAZIDE                            | 21187-98-4                   | -0.6135 |
| CHRYSOPHANOL                          | 481-74-3                     | -0.6109 |
| PROPYLTHIOURACIL                      | 51-52-5                      | -0.6104 |
| CAMYLOFINE DIHYDROCHLORIDE            | 54-30-8                      | -0.6102 |
| PREDNISOLONE                          | 50-24-8 [anhydrous], 52438   | -0.6090 |
| LIOTHYRONINE                          | 1823692                      | -0.6080 |
| EPHEDRINE (1R,2S) HYDROCHLORIDE       | 50-98-6, 299-42-3 [(-)-ephe  | -0.6052 |
| CALCEIN                               | 1461-15-0                    | -0.6044 |
| 7,4'-DIMETHOXYISOFLAVONE              |                              | -0.6007 |
| CATECHIN TETRAMETHYLETHER             |                              | -0.6007 |
| TIOXOLONE                             | 4991-65-5                    | -0.6004 |
| EPICATECHIN                           | 490-46-0                     | -0.5991 |
| INDAPAMIDE                            | 26807-65-8                   | -0.5986 |
| DEOXYSPAPPANONE B 7,3'-DIMETHYL ETHER |                              | -0.5985 |
| DIBENZOYLMETHANE                      | 120-46-7                     | -0.5981 |
| PROPIDIUM IODIDE                      | 25535-16-4                   | -0.5974 |
| TRIMETHYLCOLCHICINIC ACID             | 3482-37-9                    | -0.5952 |
| LOXAPINE SUCCINATE                    | 27833-64-3, 1977-10-2 [lox   | -0.5943 |
| PHENYLACETOHYDROXAMIC ACID            |                              | -0.5935 |
| GADOTERIDOL                           | 120066-54-8                  | -0.5932 |
| TRYPTAMINE                            | 61-54-1                      | -0.5917 |
| CEPHARANTHINE                         | 481-49-2                     | -0.5888 |
| PAPAVERINE HYDROCHLORIDE              | 61-25-6, 58-74-2 [papaverin  | -0.5884 |
| ANGOLENSIN (R)                        | 4842-48-2                    | -0.5875 |
| LIPOAMIDE                             | 3206-73-3                    | -0.5870 |
| LUMIRACOXIB                           | 220991-20-8                  | -0.5866 |
| CARBAZOCHROME                         | 69-81-8                      | -0.5855 |
| ANTIAROL                              | 642-71-7                     | -0.5850 |
| 3,5-DIHYDROXYFLAVONE                  | 6665-69-6                    | -0.5849 |
| BUDESONIDE                            | 51333-22-3, 51372-29-3       | -0.5836 |
| CHINIOFON                             | 8002-90-2                    | -0.5819 |
| TOPOTECAN HYDROCHLORIDE               | 119413-54-6                  | -0.5797 |
| DROFENINE HYDROCHLORIDE               | 1679-76-1                    | -0.5788 |
| LEVONORGESTREL                        | 797-63-7                     | -0.5785 |
| ENTECAVIR MONOHYDRATE                 | 209216-23-9                  | -0.5765 |
| AVOCADYNE                             | 34524-38-4                   | -0.5763 |
| DEOXYSPAPPANONE B 7,4'-DIMETHYL ETHER |                              | -0.5757 |
| PHENYL BUTYRATE SODIUM                | 90-27-7 (phenylbutyric acid  | -0.5724 |
| gamma-AMINOBUTYRIC ACID HYDROCHLOR    | 56-12-2 (base)               | -0.5714 |
| ACETYL HYMETOCHROME                   | 309490                       | -0.5702 |
| HEXAMETHYLQUERCETAGETIN               | 1251-84-9                    | -0.5694 |
| LISINAPRIL                            | 83915-83-7, 76547-98-3 [ar   | -0.5692 |
| DESACETYL COLFORISIN                  | 64657-20-1                   | -0.5664 |
| ISOSORBIDE DINITRATE                  | 87-33-2                      | -0.5661 |
| ASCORBIC ACID                         | 50-81-7                      | -0.5653 |
| PANGAMIC ACID SODIUM                  | 20858-86-0                   | -0.5648 |
| PHENINDIONE                           | 83-12-5                      | -0.5647 |
| TRICHLOROETHYLENE                     | 79-01-6                      | -0.5641 |
| TRIFLUPROMAZINE HYDROCHLORIDE         | 1098-60-8, 146-54-3 [triflup | -0.5613 |
| HYDROFLUMETHIAZIDE                    | 135-09-1                     | -0.5603 |
| HYDROXYUREA                           | 127-07-1                     | -0.5588 |
| LOMEFLOXACIN HYDROCHLORIDE            | 98079-51-7 (acid)            | -0.5575 |
| SODIUM FLUOROACETATE                  | 62-74-8                      | -0.5569 |
| ALOGLIPTIN BENZOATE                   | 850649-62-6                  | -0.5558 |
| L-SERYL-L-GLUTAMINE                   | 94421-66-6                   | -0.5545 |
| MILTEFOSINE [5mM]                     | 58066-85-6                   | -0.5545 |
| MEMANTINE HYDROCHLORIDE               | 41100-52-1                   | -0.5532 |
| 3,4',5,6,7-PENTAMETHOXYFLAVONE        | 4472-73-5                    | -0.5513 |
| BIXIN                                 | 39937-23-0                   | -0.5509 |
| FLUROTHYL                             | 333-36-8                     | -0.5504 |

|                                        |               |        |
|----------------------------------------|---------------|--------|
| Losartan                               | 114798-26-4   | 0.0153 |
| Amcinonide                             | 51022-69-6    | 0.0160 |
| Nelarabine                             | 121032-29-9   | 0.0167 |
| Benfotiamine                           | 22457-89-2    | 0.0170 |
| Mometasone furoate                     | 83919-23-7    | 0.0180 |
| Raloxifene hydrochloride               | 82640-04-8    | 0.0202 |
| Acetylcysteine                         | 616-91-1      | 0.0224 |
| Bambuterol hydrochloride               | 81732-46-9    | 0.0235 |
| Cinoxacin                              | 28657-80-9    | 0.0254 |
| Closantel                              | 57808-65-8    | 0.0264 |
| Amiodarone hydrochloride               | 19774-82-4    | 0.0268 |
| 2-Aminobenzenesulfonamide              | 3306-62-5     | 0.0276 |
| Cefoperazone dihydrate                 | not available | 0.0289 |
| Butylscopolammonium (n-) bromide       | 149-64-4      | 0.0291 |
| Flumethasone                           | 2135-17-3     | 0.0319 |
| Imipenem                               | 74431-23-5    | 0.0321 |
| S-(+)-ibuprofen                        | 51146-56-6    | 0.0325 |
| Flunixin meglumine                     | 42461-84-7    | 0.0349 |
| Mizolastine                            | 108612-45-9   | 0.0365 |
| Lamivudine                             | 134678-17-4   | 0.0390 |
| Phenylpropanolamine hydrochloride      | 154-41-6      | 0.0410 |
| Dihydroergotamine tartrate             | 5989-77-5     | 0.0429 |
| Cefpodoxime proxetil                   | 87239-81-4    | 0.0442 |
| Glibenclamide                          | 10238-21-8    | 0.0449 |
| Phenylbutazone                         | 50-33-9       | 0.0460 |
| Mexiletine hydrochloride               | 1267397       | 0.0506 |
| Troleandomycin                         | 311074        | 0.0507 |
| Fenopropfen calcium salt dihydrate     | 53746-45-5    | 0.0507 |
| Diethylstilbestrol                     | 56-53-1       | 0.0547 |
| Dinoprost trometamol                   | 38362-01-5    | 0.0549 |
| Pipenzolate bromide                    | 125-51-9      | 0.0614 |
| Diosmin                                | 520-27-4      | 0.0628 |
| Benfluorex                             | 23602-78-0    | 0.0633 |
| Zimelidine dihydrochloride monohydrate | 61129-30-4    | 0.0650 |
| Trimeprazine tartrate                  | 4330-99-8     | 0.0727 |
| Primidone                              | 125-33-7      | 0.0728 |
| Alprostadil                            | 745-65-3      | 0.0733 |
| Tyloxapol                              | 25301-02-4    | 0.0741 |
| Mesna                                  | 19767-45-4    | 0.0746 |
| (+,-)-Synephrine                       | 94-07-5       | 0.0753 |
| Iodixanol                              | 92339-11-2    | 0.0754 |
| Ceforanide                             | 60925-61-3    | 0.0762 |
| Pinacidil                              | 85371-64-8    | 0.0765 |
| Gabexate mesilate                      | 56974-61-9    | 0.0775 |
| Nystatine                              | 1400-61-9     | 0.0806 |
| Famprofazone                           | 22881-35-2    | 0.0809 |
| Pyrvinium pamoate                      | 3546-41-6     | 0.0836 |
| Betazole hydrochloride                 | 138-92-1      | 0.0859 |
| Carteolol hydrochloride                | 51781-21-6    | 0.0890 |
| Chlorotrianisene                       | 569-57-3      | 0.0908 |
| Niacin                                 | 59-67-6       | 0.0926 |
| Sumatriptan succinate                  | 103628-48-4   | 0.0936 |
| Methazolamide                          | 554-57-4      | 0.0937 |
| Edrophonium chloride                   | 116-38-1      | 0.0946 |
| Cilnidipine                            | 132203-70-4   | 0.0981 |
| Sulfamerazine                          | 127-79-7      | 0.0982 |
| Terbinafine                            | 91161-71-6    | 0.0989 |
| Linezolid                              | 165800-03-3   | 0.0994 |
| Carbenoxolone disodium salt            | 7421-40-1     | 0.1003 |
| Pravastatin                            | 81093-37-0    | 0.1013 |
| Sildenafil                             | 139755-83-2   | 0.1036 |
| Eserine hemisulfate salt               | 64-47-1       | 0.1047 |
| Diatrizoic acid dihydrate              | 50978-11-5    | 0.1091 |
| Deflazacort                            | 14484-47-0    | 0.1106 |
| Ketorolac tromethamine                 | 74103-07-4    | 0.1118 |
| Tacrine hydrochloride                  | 1684-40-8     | 0.1137 |
| Diacerein                              | 13739-02-1    | 0.1149 |
| Tetrahydrozoline hydrochloride         | 522-48-5      | 0.1153 |
| Lorglumide sodium salt                 | 97964-56-2    | 0.1160 |
| Stavudine                              | 3056-17-5     | 0.1169 |
| Norgestimate                           | 35189-28-7    | 0.1174 |
| Monobenzene                            | 103-16-2      | 0.1204 |
| Olmecartan                             | 144689-63-4   | 0.1262 |
| Beclomethasone dipropionate            | 1327543       | 0.1271 |
| Raltitrexed                            | 112887-68-0   | 0.1309 |
| Sarafloxacin                           | 98105-99-8    | 0.1341 |
| Dantrolene sodium salt                 | 14663-23-1    | 0.1363 |
| Bromperidol                            | 10457-90-6    | 0.1378 |
| Carbimazole                            | 22232-54-8    | 0.1395 |

|                                  |                               |         |
|----------------------------------|-------------------------------|---------|
| OXACILLIN SODIUM                 | 7240-38-2, 1173-88-2 [anhy]   | -0.5487 |
| ACETOPHENAZINE MALEATE           | 5714-00-1                     | -0.5477 |
| AJMALINE                         | 4360-17-7                     | -0.5477 |
| GARDENIN B                       | 2798-20-1                     | -0.5462 |
| TRIMETHOBENZAMIDE HYDROCHLORIDE  | 554-92-7, 138-56-7 [trimeth]  | -0.5462 |
| 6,4'-DIMETHOXYFLAVONE            | 54401-47-7                    | -0.5457 |
| DIPYROCETYL                      | 486-79-3                      | -0.5438 |
| MERCAPTOPYRINE                   | 6112-76-1, 50-44-2 [anhydr]   | -0.5424 |
| PANTETHINE                       | 16816-67-4                    | -0.5418 |
| PIMPINELLIN                      | 131-12-4                      | -0.5405 |
| AVERMECTIN A1a                   | 71827-03-7                    | -0.5397 |
| SULFAMETHIZOLE                   | 144-82-1                      | -0.5394 |
| TIMOLOL MALEATE                  | 26921-17-5, 91524-16-2 [tir]  | -0.5360 |
| CEFTIBUTEN                       | 97519-39-6                    | -0.5347 |
| 7-METHOXYCHROMONE                |                               | -0.5337 |
| ROFLUMILAST                      | 162401-32-3                   | -0.5334 |
| AMYGDALIN                        | 29883-15-6                    | -0.5328 |
| SULFAMETHOXAZOLE                 | 723-46-6                      | -0.5308 |
| ESTRADIOL-3-SULFATE, SODIUM SALT | 4999-79-5                     | -0.5292 |
| MECLIZINE HYDROCHLORIDE          | 31884-77-2, 1104-22-9 [anf]   | -0.5275 |
| COSMOSIIN                        | 578-74-5                      | -0.5267 |
| 3-OXOURSAN(28-13)OLIDE           |                               | -0.5259 |
| CURCUMIN                         | 458-37-7                      | -0.5249 |
| DICHLOROEVERNIC ACID             |                               | -0.5244 |
| LACTULOSE                        | 4618-18-2                     | -0.5216 |
| TRETINOIN                        | 302-79-4                      | -0.5172 |
| DIFLORASONE DIACETATE            | 33564-31-7                    | -0.5139 |
| VALETHAMATE BROMIDE              | 90-22-2                       | -0.5137 |
| ACETANILIDE                      | 103-84-4                      | -0.5121 |
| GOSSYPIN                         | 652-78-8                      | -0.5099 |
| THEAFLAVIN                       | 1011850                       | -0.5099 |
| TRIPTOPHENOLIDE                  | 74285-86-2                    | -0.5097 |
| HARMALOL HYDROCHLORIDE DIHYDRATE | 1507909                       | -0.5090 |
| EFLOXATE                         | 119-41-5                      | -0.5042 |
| MEXICANOLIDE                     | 1915-67-9                     | -0.4998 |
| BIAPENEM                         | 120410-24-4                   | -0.4989 |
| CLOXACILLIN SODIUM               | 7081-44-9, 642-78-4 [anhyd]   | -0.4987 |
| PYRAZINAMIDE                     | 98-96-4                       | -0.4974 |
| AURIN TRICARBOXYLIC ACID         | 4431-00-9                     | -0.4966 |
| ROBENIDINE HYDROCHLORIDE         | 25875-50-7                    | -0.4956 |
| ADRENOSTERONE                    | 382-45-6                      | -0.4924 |
| EDARAVONE                        | 89-25-8                       | -0.4924 |
| ESTRIOL                          | 50-27-1, 514-68-1 [as, succi] | -0.4890 |
| APOMORPHINE HYDROCHLORIDE        | 41372-20-7, 314-19-2 [anhy]   | -0.4889 |
| 2',6'-DIMETHOXYACETOPHENONE      | 51228                         | -0.4884 |
| 4'-METHOXYFLAVONE                | 4143-74-2                     | -0.4853 |
| CHOLECALCIFEROL                  | 67-97-0                       | -0.4846 |
| IODOFORM                         | 75-47-8                       | -0.4845 |
| MYCLOBUTANIL                     | 88671-89-0                    | -0.4843 |
| 6-AZA-2-THIOTHYMIN               | 615-76-9                      | -0.4837 |
| VALPROATE SODIUM                 | 1069-66-5                     | -0.4830 |
| LAPACHOL METHYL ETHER            | 17241-45-1                    | -0.4824 |
| DACARBAZINE                      | 891986                        | -0.4821 |
| METHICILLIN SODIUM               | 7246-14-2, 132-92-3 [anhyd]   | -0.4800 |
| ISOSAFROLE                       | 120-58-1                      | -0.4798 |
| RHAMNETIN                        | 90-19-7                       | -0.4781 |
| SOLIFENACIN SUCCINATE            | 242478-37-1                   | -0.4775 |
| BALSALAZIDE DISODIUM             | 150399-21-6                   | -0.4775 |
| CAPSAICIN                        | 404-86-4                      | -0.4775 |
| CANDICIDIN                       | 1403-17-4                     | -0.4775 |
| 7,2'-DIMETHOXYFLAVONE            |                               | -0.4758 |
| FENIPENTOL                       | 583-03-9                      | -0.4751 |
| ISOPEONOL                        | 493-33-4                      | -0.4745 |
| METHYL GAMBOGINATE               |                               | -0.4743 |
| PHENTOLAMINE HYDROCHLORIDE       | 73-05-2, 50-60-2 [phentolar]  | -0.4742 |
| SPARASSOL                        | 520-43-4                      | -0.4726 |
| PIMOZIDE                         | 2062-78-4                     | -0.4714 |
| FENOTEROL HYDROBROMIDE           | 16409                         | -0.4709 |
| N-METHYL-L-ISOLEUCINE            | 5125-98-8                     | -0.4707 |
| LINALOOL (+)                     | 78-70-6                       | -0.4704 |
| SINAPIC ACID METHYL ETHER        | 90-50-6                       | -0.4698 |
| LEOIDIN DIMETHYL ETHER           |                               | -0.4693 |
| CINROMIDE                        | 58473-74-8                    | -0.4690 |
| ONDANSETRON HYDROCHLORIDE        | 99614-02-5                    | -0.4671 |
| METRONIDAZOLE                    | 443-48-1, 69198-10-3 [metr]   | -0.4637 |
| ANDROSTERONE                     | 53-41-8                       | -0.4627 |
| DABIGATRAN ETEXILATE MESYLATE    | 593282-20-3                   | -0.4624 |
| PURPUROGALLIN-4-CARBOXYLIC ACID  | 50mg                          | -0.4615 |
| DIMETHYLSULFONE                  | 67-71-0                       | -0.4608 |

|                                            |             |        |
|--------------------------------------------|-------------|--------|
| Dibucaine                                  | 85-79-0     | 0.1396 |
| Clenbuterol hydrochloride                  | 21898-19-1  | 0.1402 |
| Estropipate                                | 7280-37-7   | 0.1412 |
| Oxymetholone                               | 434-07-1    | 0.1472 |
| Cromolyn disodium salt                     | 15826-37-6  | 0.1523 |
| Decamethonium bromide                      | 541-22-0    | 0.1525 |
| Indomethacin                               | 53-86-1     | 0.1554 |
| R(-) Apomorphine hydrochloride hemihydrate | 41372-20-7  | 0.1557 |
| Mitotane                                   | 53-19-0     | 0.1560 |
| Thioguanosine                              | 85-31-4     | 0.1564 |
| Tulobuterol                                | 41570-61-0  | 0.1601 |
| Ivermectin                                 | 70288-86-7  | 0.1602 |
| Cloxacillin sodium salt                    | 642-78-4    | 0.1665 |
| Methylprednisolone, 6-alpha                | 83-43-2     | 0.1665 |
| Iodipamide                                 | 606-17-7    | 0.1677 |
| Melatonin                                  | 73-31-4     | 0.1682 |
| Spectinomycin dihydrochloride              | 21736-83-4  | 0.1688 |
| Levofloxacin                               | 100986-85-4 | 0.1694 |
| Rasagiline                                 | 136236-51-6 | 0.1711 |
| Meropenem                                  | 96036-03-2  | 0.1714 |
| Suprofen                                   | 40828-46-4  | 0.1721 |
| Pranoprofen                                | 52549-17-4  | 0.1736 |
| Tegafur                                    | 17902-23-7  | 0.1737 |
| Topiramate                                 | 97240-79-4  | 0.1743 |
| Levocabastine hydrochloride                | 79547-78-7  | 0.1751 |
| Zolmitriptan                               | 139264-17-8 | 0.1817 |
| Raclopride                                 | 84225-95-6  | 0.1818 |
| Lofexidine                                 | 31036-80-3  | 0.1818 |
| Paliperidone                               | 144598-75-4 | 0.1846 |
| Isoxicam                                   | 34552-84-6  | 0.1853 |
| Nalidixic acid sodium salt                 | 538497      | 0.1871 |
| Ipsapirone                                 | 95847-70-4  | 0.1879 |
| Mercaptopurine                             | 50-44-2     | 0.1887 |
| Hydrocortisone base                        | 50-23-7     | 0.1917 |
| Metoprolol(+,-) (+)-tartrate salt          | 56392-17-7  | 0.1926 |
| S(-)Eticlopride hydrochloride              | 97612-24-3  | 0.1926 |
| Propylthiouracil                           | 51-52-5     | 0.1948 |
| Darunavir                                  | 635728-49-3 | 0.1960 |
| Omeprazole                                 | 73590-58-6  | 0.1961 |
| Pyrrithyldione                             | 77-04-3     | 0.1965 |
| Venlafaxine                                | 93413-69-5  | 0.1981 |
| Acipimox                                   | 51037-30-0  | 0.1983 |
| Zalcitabine                                | 7481-89-2   | 0.1993 |
| Lymecycline                                | 992-21-2    | 0.1993 |
| Neostigmine bromide                        | 114-80-7    | 0.1998 |
| Fluorometholone                            | 426-13-1    | 0.2000 |
| Tenoxicam                                  | 59804-37-4  | 0.2048 |
| Diclofenac sodium                          | 15307-79-6  | 0.2062 |
| Chlortetracycline hydrochloride            | 64-72-2     | 0.2082 |
| Trimetazidine dihydrochloride              | 13171-25-0  | 0.2103 |
| Ethacrynic acid                            | 58-54-8     | 0.2111 |
| Butamben                                   | 94-25-7     | 0.2114 |
| Tenatoprazole                              | 113712-98-4 | 0.2142 |
| Bucladesine sodium salt                    | 16980-89-5  | 0.2192 |
| Serotonin hydrochloride                    | 153-98-0    | 0.2194 |
| Ethoxyquin                                 | 91-53-2     | 0.2204 |
| Antazoline hydrochloride                   | 2508-72-7   | 0.2214 |
| Aniracetam                                 | 72432-10-1  | 0.2218 |
| (+,-)-Octopamine hydrochloride             | 770-05-8    | 0.2229 |
| D,L-Penicillamine                          | 52-66-4     | 0.2234 |
| Acefylline                                 | 652-37-9    | 0.2235 |
| Buflomedil hydrochloride                   | 35543-24-9  | 0.2240 |
| Progesterone                               | 57-83-0     | 0.2246 |
| Ropivacaine hydrochloride                  | 84057-95-4  | 0.2246 |
| Methylatropine nitrate                     | 52-88-0     | 0.2252 |
| Praziquantel                               | 55268-74-1  | 0.2297 |
| Prothionamide                              | 14222-60-7  | 0.2307 |
| Irsogladine maleate                        | 84504-69-8  | 0.2308 |
| Ganciclovir                                | 82410-32-0  | 0.2310 |
| Cortisol acetate                           | 50-03-3     | 0.2354 |
| Olopatadine hydrochloride                  | 140462-76-6 | 0.2360 |
| Mephenytoin                                | 50-12-4     | 0.2371 |
| Cefsulodin sodium salt                     | 52152-93-9  | 0.2374 |
| Fluticasone propionate                     | 80474-14-2  | 0.2402 |
| Enoxacin                                   | 84294-96-2  | 0.2403 |
| Papaverine hydrochloride                   | 61-25-6     | 0.2418 |
| Tolcapone                                  | 134308-13-7 | 0.2460 |
| Albendazole                                | 54965-21-8  | 0.2470 |
| Aminocaproic acid                          | 60-32-2     | 0.2479 |

|                                                   |                               |         |
|---------------------------------------------------|-------------------------------|---------|
| CARAPIN-8(9)-ENE                                  |                               | -0.4587 |
| PENICILLIN V POTASSIUM                            | 132-98-9, 87-08-1 [penicillir | -0.4554 |
| 3-DESMETHYL-5-DESHYDROXYSCLEROIN                  |                               | -0.4551 |
| NEOHESPERIDIN DIHYDROCHALCONE                     | 20702-77-6                    | -0.4541 |
| CYSTEINE HYDROCHLORIDE                            | 1880366                       | -0.4533 |
| LEUCOVORIN CALCIUM                                | 1492-18-8                     | -0.4496 |
| MEPARFYLON                                        | 77-75-8                       | -0.4489 |
| SOLIDAGENONE                                      | 23534-56-7                    | -0.4484 |
| 4-METHYLDAPHNETIN                                 | 2107-77-9                     | -0.4471 |
| CEFORANIDE                                        | 60925-61-3                    | -0.4459 |
| ESCITALOPRAM OXALATE                              | 219861-08-2                   | -0.4455 |
| SYNEPHRINE TARTRATE                               | 16589-24-5                    | -0.4442 |
| EUDESMIC ACID                                     | 118-41-2                      | -0.4442 |
| MELEZITOSE                                        | 597-12-6                      | -0.4442 |
| HAEMATOXYLIN                                      | 517-28-2                      | -0.4419 |
| EPICATECHIN MONOGALLATE                           | 1257-08-5                     | -0.4414 |
| NORSTICTIC ACID                                   | 571-67-5                      | -0.4387 |
| GINKGOLIDE A                                      | 15291-75-5                    | -0.4373 |
| CAPECITABINE                                      | 154361-50-9                   | -0.4355 |
| ALANYL-DI-LEUCINE                                 |                               | -0.4350 |
| 3alpha-HYDROXY-4,4-BISNOR-8,11,13-PODOCARPATRIENE |                               | -0.4335 |
| CEFMETAZOLE SODIUM                                | 56796-39-5                    | -0.4333 |
| DIPHENYLUREA                                      | 102-07-8                      | -0.4326 |
| NOREPINEPHRINE TARTRATE                           | 69815-49-2, 51-41-2 [norep    | -0.4318 |
| CIMICIFUGOSIDE H1                                 | 163046-73-9                   | -0.4313 |
| GRANISETRON HYDROCHLORIDE                         | 107007-99-8                   | -0.4311 |
| CAMPTOTHECIN                                      | 2114454                       | -0.4304 |
| LEVULINIC ACID, 3-BENZYLIDENYL-                   |                               | -0.4298 |
| ARTEMETHER                                        | 71963-77-4                    | -0.4282 |
| TAZOBACTAM                                        | 89786-04-9                    | -0.4280 |
| HEMICHOLINIUM BROMIDE                             | 312-45-8                      | -0.4274 |
| LETROZOLE                                         | 112809-51-5                   | -0.4270 |
| BAICALIN                                          | 21967-41-9                    | -0.4244 |
| SALICYLANILIDE                                    | 87-17-2                       | -0.4242 |
| HAEMATOMMIC ACID, ETHYL ESTER                     | 39503-14-5                    | -0.4236 |
| METHYL PARABEN                                    | 99-76-3                       | -0.4232 |
| GLUCITOL-4-GLUCOPYANOSIDE                         |                               | -0.4214 |
| 7,3'-DIMETHOXYFLAVONE                             |                               | -0.4209 |
| CYANIDIN CHLORIDE                                 | 528-58-5                      | -0.4199 |
| MENTHONE                                          | 14073-97-3                    | -0.4155 |
| SALVINORIN A                                      | 83729-01-5                    | -0.4155 |
| METHAPYRILENE HYDROCHLORIDE                       | 135-23-9, 91-80-5 [methapy    | -0.4135 |
| POLYMYXIN B SULFATE                               | 1405-20-5, 1404-26-8 [poly    | -0.4126 |
| 3,4-DIDESMETHYL-5-DESHYDROXY-3'-ETHOXYSCLEROIN    |                               | -0.4119 |
| PIROXICAM                                         | 36322-90-4                    | -0.4114 |
| CEFUROXIME AXETIL                                 | 64544-07-6, 55268-75-2 [ce    | -0.4101 |
| METHAZOLAMIDE                                     | 554-57-4                      | -0.4101 |
| PIPERONAL                                         | 120-57-0                      | -0.4087 |
| ETHYL DICHLOROORSELLINATE                         |                               | -0.4072 |
| ISOTECTORIGENIN, 7-METHYL ETHER                   |                               | -0.4072 |
| TRYPTOPHAN (D)                                    | 153-94-6                      | -0.4033 |
| PALMATINE CHLORIDE                                | 10605-02-4                    | -0.4029 |
| DOCUSATE SODIUM                                   | 577-11-7                      | -0.4029 |
| AMINOPYRINE                                       | 58-15-1                       | -0.4026 |
| CYTISINE                                          | 485-35-8                      | -0.4004 |
| GLYCOCHOLIC ACID                                  | 475-31-0                      | -0.4004 |
| HYDROXYCHLOROQUINE SULFATE                        | 747-36-4, 118-42-3 [hydroxy   | -0.4004 |
| ISOBERGAPTEN                                      | 482-48-4                      | -0.4004 |
| ACETRIAZOIC ACID                                  | 85-36-9, 129-63-5 [acetriazo  | -0.3982 |
| DOCOSANOL                                         | 661-19-8                      | -0.3980 |
| ANTHRACENE-9-CARBOXYLIC ACID                      | 723-62-6                      | -0.3980 |
| TOLBUTAMIDE                                       | 64-77-7                       | -0.3979 |
| TRIMEDLURE                                        | 12002-53-8                    | -0.3978 |
| beta-SITOSTEROL                                   | 83-46-5                       | -0.3973 |
| 4-PHENYLBUTYRIC ACID                              | 1821-12-1, 1716-12-7 [sodi    | -0.3956 |
| SCLAREOL                                          | 515-03-7                      | -0.3954 |
| PRIMIDONE                                         | 125-33-7                      | -0.3950 |
| SULBACTAM                                         | 68373-14-8                    | -0.3934 |
| DEXAMETHASONE SODIUM PHOSPHATE                    | 2392-39-4, 312-93-6 [dexas    | -0.3932 |
| TOLAZOLINE HYDROCHLORIDE                          | 59-97-2, 59-98-3 [tolazoline  | -0.3914 |
| LEFLUNOMIDE                                       | 75706-12-6                    | -0.3894 |
| ACECLOFENAC                                       | 89796-99-6                    | -0.3890 |
| CARBETAPENTANE CITRATE                            | 23142-01-0, 77-23-6 [carbe    | -0.3856 |
| NONIC ACID                                        |                               | -0.3855 |
| QUERCETIN                                         | 117-39-5, 6151-25-3(hydrat    | -0.3851 |
| PHENOTHIN                                         | 26002-80-2                    | -0.3851 |
| LUPANINE PERCHLORATE                              | 550-90-3 (base)               | -0.3833 |
| 7-HYDROXY-2'-METHOXYISOFALVONE                    |                               | -0.3826 |
| ADIPHENINE HYDROCHLORIDE                          | 50-42-0, 64-95-9 [adiphenir   | -0.3826 |

|                                     |              |        |
|-------------------------------------|--------------|--------|
| Amikacin hydrate                    | 37517-28-5   | 0.2489 |
| N-Acetyl-L-leucine                  | 1188-21-2    | 0.2526 |
| Vigabatrin hydrochloride            | 1391054-02-6 | 0.2526 |
| Sulfathiazole                       | 72-14-0      | 0.2535 |
| Torse mide                          | 56211-40-6   | 0.2545 |
| Tirofiban hydrochloride             | 150915-40-5  | 0.2563 |
| Viloxazine hydrochloride            | 35604-67-2   | 0.2580 |
| Androsterone                        | 53-41-8      | 0.2581 |
| Etretinate                          | 54350-48-0   | 0.2582 |
| Quinidine hydrochloride monohydrate | 6151-40-2    | 0.2603 |
| Sparfloxacin                        | 110871-86-8  | 0.2667 |
| Sulfamethazine sodium salt          | 1981-58-4    | 0.2673 |
| Amprolium hydrochloride             | 137-88-2     | 0.2678 |
| Diclazuril                          | 101831-37-2  | 0.2709 |
| Adamantamine fumarate               | 80789-67-9   | 0.2721 |
| Valproic acid                       | 99-66-1      | 0.2755 |
| Acetazolamide                       | 59-66-5      | 0.2768 |
| Pireperone                          | 75444-65-4   | 0.2776 |
| Hydroxyzine dihydrochloride         | 2192-20-3    | 0.2786 |
| Trichlormethiazide                  | 133-67-5     | 0.2794 |
| 6-Furfurylaminopurine               | 525-79-1     | 0.2801 |
| Cefotiam hydrochloride              | 61622-34-2   | 0.2833 |
| Ioversol                            | 87771-40-2   | 0.2860 |
| Nadifloxacin                        | 124858-35-1  | 0.2873 |
| Cephalothin sodium salt             | 58-71-9      | 0.2902 |
| Naftifine hydrochloride             | 65473-14-5   | 0.2925 |
| Liothyronine                        | 1823692      | 0.2935 |
| Clemizole hydrochloride             | 1163-36-6    | 0.2936 |
| D-cycloserine                       | 68-41-7      | 0.2995 |
| Indoprofen                          | 31842-01-0   | 0.3031 |
| Amrinone                            | 60719-84-8   | 0.3064 |
| Balsalazide Sodium                  | 80573-04-2   | 0.3086 |
| Benzylpenicillin sodium             | 69-57-8      | 0.3087 |
| Sulfamethoxazole                    | 723-46-6     | 0.3101 |
| Secnidazole                         | 3366-95-8    | 0.3135 |
| Warfarin                            | 81-81-2      | 0.3141 |
| Methimazole                         | 60-56-0      | 0.3147 |
| Phenindione                         | 83-12-5      | 0.3165 |
| Tazobactam                          | 89786-04-9   | 0.3182 |
| Oxcarbazepine                       | 28721-07-5   | 0.3244 |
| Estriol                             | 50-27-1      | 0.3269 |
| Piromidic acid                      | 19562-30-2   | 0.3278 |
| Argatroban                          | 74863-84-6   | 0.3287 |
| Benzbromarone                       | 3562-84-3    | 0.3292 |
| (R) -Naproxen sodium salt           | 23979-41-1   | 0.3292 |
| Tylosin                             | 1401-69-0    | 0.3302 |
| Guaifenesin                         | 93-14-1      | 0.3305 |
| Telmisartan                         | 144701-48-4  | 0.3311 |
| Clobutinol hydrochloride            | 1215-83-4    | 0.3325 |
| Iocetamic acid                      | 16034-77-8   | 0.3326 |
| Pralidoxime chloride                | 51-15-0      | 0.3329 |
| Celiprolol hydrochloride            | 57470-78-7   | 0.3333 |
| Cefadroxil                          | 50370-12-2   | 0.3358 |
| Cortisone                           | 53-06-5      | 0.3364 |
| Capecitabine                        | 154361-50-9  | 0.3369 |
| Metolazone                          | 17560-51-9   | 0.3405 |
| Retinoic acid                       | 302-79-4     | 0.3412 |
| Temozolomide                        | 85622-93-1   | 0.3412 |
| Bemegride                           | 64-65-3      | 0.3416 |
| Iobenguane sulfate                  | 103346-16-3  | 0.3420 |
| Allopurinol                         | 315-30-0     | 0.3431 |
| Hexylcaine hydrochloride            | 532-76-3     | 0.3435 |
| Caffeine                            | 58-08-2      | 0.3458 |
| Demeclocycline hydrochloride        | 64-73-3      | 0.3460 |
| Phentolamine hydrochloride          | 73-05-2      | 0.3471 |
| Rebamipide                          | 90098-04-7   | 0.3493 |
| Theophylline monohydrate            | 5967-84-0    | 0.3516 |
| Aztreonam                           | 78110-38-0   | 0.3524 |
| Flubendazol                         | 31430-15-6   | 0.3540 |
| Betahistine mesylate                | 54856-23-4   | 0.3558 |
| Bisacodyl                           | 603-50-9     | 0.3565 |
| Mefexamide hydrochloride            | 3413-64-7    | 0.3571 |
| Dyclonine hydrochloride             | 536-43-6     | 0.3594 |
| Ketanserin tartrate hydrate         | 83846-83-7   | 0.3600 |
| Pepstatin A                         | 26305-03-3   | 0.3604 |
| Dexamethasone acetate               | 1177-87-3    | 0.3613 |
| Guanadrel sulfate                   | 22195-34-2   | 0.3636 |
| Domperidone                         | 57808-66-9   | 0.3644 |
| Roxatidine Acetate hydrochloride    | 93793-83-0   | 0.3658 |

|                                            |                             |         |
|--------------------------------------------|-----------------------------|---------|
| ZIDOVUDINE [AZT]                           | 30516-87-1                  | -0.3816 |
| BORNYL ACETATE                             | 76-49-3                     | -0.3815 |
| UMBELLIFERONE                              | 93-35-6                     | -0.3791 |
| FLUPIRTINE MALEATE                         | 75507-68-5                  | -0.3788 |
| TOTAROL                                    | 511-15-9                    | -0.3784 |
| METHYL PARATHIONE                          | 298-00-0                    | -0.3779 |
| FENDILINE HYDROCHLORIDE                    | 113042-18-7                 | -0.3770 |
| AMINOPHYLLINE                              | 317-34-0                    | -0.3754 |
| BENZETHONIUM CHLORIDE                      | 121-54-0                    | -0.3735 |
| TRIHXYPHENIDYL HYDROCHLORIDE               | 52-49-3                     | -0.3724 |
| SODIUM MONOFLUOROPHOSPHATE                 | 10163-15-2                  | -0.3717 |
| TETROQUINONE                               | 319-89-1                    | -0.3713 |
| ACETYLCARNITINE                            | 3040-38-8                   | -0.3702 |
| CYPROHEPTADINE HYDROCHLORIDE               | 969-33-5                    | -0.3701 |
| SPICULISPORIC ACID                         | 469-77-2                    | -0.3690 |
| PRILOCAINE HYDROCHLORIDE                   | 1786-81-8, 721-50-6 [priloc | -0.3674 |
| LEVETIRACETAM                              | 102767-28-2                 | -0.3664 |
| URACIL                                     | 66-22-8                     | -0.3660 |
| 3beta-HYDROXY-23,24-BISNORCHOL-5-ENIC ACID |                             | -0.3659 |
| ENOXOLONE                                  | 471-53-4                    | -0.3653 |
| PYRITHYLDIONE                              | 77-04-3                     | -0.3653 |
| NAFRONYL OXALATE                           | 3200-06-4, 31329-57-4 [naf  | -0.3648 |
| BACLOFEN HYDROCHLORIDE (+/-)               | 70206-22-3                  | -0.3629 |
| AZOBENZENE                                 | 103-33-3                    | -0.3625 |
| MORANTEL CITRATE                           | 26155-31-7, 20574-50-9 [m   | -0.3623 |
| PROXYPHYLLINE                              | 6003-00-9                   | -0.3603 |
| ROSUVASTATIN CALCIUM                       | 147098-20-2                 | -0.3597 |
| THEANINE POTASSIUM                         | 3081-61-6                   | -0.3579 |
| VERBENALIN                                 | 548-37-8                    | -0.3578 |
| LITHOCHOLIC ACID                           | 434-13-9                    | -0.3566 |
| DICYCLOHEXYLUREA                           | 2387-23-7                   | -0.3559 |
| MEFEXAMIDE HYDROCHLORIDE                   | 1227-61-8                   | -0.3558 |
| CATECHIN PENTAACETATE                      |                             | -0.3534 |
| KETOPROFEN                                 | 22071-15-4                  | -0.3518 |
| FISETIN                                    | 528-48-3                    | -0.3490 |
| NOVOBIOCIN SODIUM                          | 1476-53-5, 303-81-1 [novoc  | -0.3463 |
| CEFSULODIN SODIUM                          | 52152-93-9, 62587-73-9 [ce  | -0.3459 |
| TACROLIMUS                                 | 109581-93-3                 | -0.3458 |
| HECOGENIN                                  | 467-55-0                    | -0.3456 |
| XANTHYLETIN                                | 553-19-5                    | -0.3454 |
| CARBADOX                                   | 1791337                     | -0.3451 |
| CITIOLONE                                  | 1195-16-0                   | -0.3449 |
| SKATOLE                                    | 83-34-1                     | -0.3431 |
| RAMELTEON                                  | 196597-26-9                 | -0.3413 |
| NORCANTHARIDIN                             |                             | -0.3411 |
| BENZOYL PEROXIDE                           | 94-36-0                     | -0.3403 |
| TAGATOSE                                   | 87-81-0                     | -0.3386 |
| HYMECROMONE METHYL ETHER                   | 2555-28-4                   | -0.3383 |
| SR-2640                                    | 105350-26-3                 | -0.3379 |
| AMOROLFINE HYDROCHLORIDE                   | 78613-38-4                  | -0.3368 |
| CHRYSENEQUINONE                            | 100900-16-1                 | -0.3359 |
| FLUMETHAZONE PIVALATE                      | 2002-29-1, 2135-17-3 [flum  | -0.3354 |
| GENETICIN                                  | 49863-47-0, 108321-42-2 [st | -0.3350 |
| GARCINOLIC ACID                            | 91893-83-3                  | -0.3319 |
| QUINIDINE GLUCONATE                        | 7054-25-3                   | -0.3314 |
|                                            |                             | -0.3314 |
| PUERARIN                                   | 3681-99-0                   | -0.3310 |
| PIPERAZINE                                 | 110-85-0, 144-29-6 [anhydr  | -0.3310 |
| 7,8-DIHYDROXYFLAVONE                       | 38183-03-8                  | -0.3303 |
| IDRAMANTONE                                | 20098-14-0                  | -0.3291 |
| SULFANILAMIDE                              | 63-74-1                     | -0.3286 |
| METAMECONINE                               | 531-88-4                    | -0.3284 |
| TIRATRICOL                                 | 51-24-1                     | -0.3240 |
| ETHIONINE                                  | 67-21-0                     | -0.3234 |
| NORDEFRIN HYDROCHLORIDE                    | 138-61-4, 6539-57-7 [norde  | -0.3223 |
| METHYLPREDNISOLONE                         | 83-43-2                     | -0.3214 |
| CHENODIOL                                  | 474-25-9                    | -0.3195 |
| SODIUM SUCCINATE                           | 110-15-6                    | -0.3195 |
| CYTIDINE                                   | 65-46-3                     | -0.3189 |
| GALANGIN                                   | 548-83-4                    | -0.3189 |
| 5,2'-DIMETHOXYFLAVONE                      |                             | -0.3188 |
| DERRUSNIN                                  | 14736-62-0                  | -0.3183 |
| QUEBRACHITOL                               | 642-38-6                    | -0.3170 |
| KETOROLAC TROMETHAMINE                     | 74103-07-4                  | -0.3169 |
| CANTHAXANTHIN (euglenanone)                | 514-78-3                    | -0.3168 |
| DUARTIN, DIMETHYL ETHER                    |                             | -0.3167 |
| TORSEMIDE                                  | 56211-40-6                  | -0.3165 |
| CETILISAT                                  | 282526-98-1                 | -0.3154 |
| ZOLEDRONIC ACID                            | 165800-06-6                 | -0.3138 |

|                                   |             |        |
|-----------------------------------|-------------|--------|
| Prednisolone                      | 50-24-8     | 0.3659 |
| Troglitazone                      | 97322-87-7  | 0.3749 |
| Moxonidine                        | 75438-57-2  | 0.3768 |
| Sulfabenzamide                    | 127-71-9    | 0.3780 |
| Bifonazole                        | 60628-96-8  | 0.3782 |
| Naphazoline hydrochloride         | 550-99-2    | 0.3785 |
| Dienestrol                        | 84-17-3     | 0.3825 |
| Eprosartan mesylate               | 133040-01-4 | 0.3835 |
| Glimepiride                       | 93479-97-1  | 0.3846 |
| Moxalactam disodium salt          | 64953-12-4  | 0.3860 |
| Methoxamine hydrochloride         | 61-16-5     | 0.3873 |
| Letrozole                         | 112809-51-5 | 0.3903 |
| Dicloxacillin sodium salt hydrate | 13412-64-1  | 0.3918 |
| Sulbactam                         | 68373-14-8  | 0.3921 |
| Succinylsulfathiazole             | 116-43-8    | 0.3947 |
| Bimatoprost                       | 155206-00-1 | 0.3951 |
| Carprofen                         | 53716-49-7  | 0.3977 |
| Methenamine                       | 100-97-0    | 0.3978 |
| Picrotoxinin                      | 17617-45-7  | 0.3980 |
| Ceftazidime pentahydrate          | 78439-06-2  | 0.4008 |
| Sulfasalazine                     | 599-79-1    | 0.4060 |
| Azlocillin sodium salt            | 37091-65-9  | 0.4088 |
| Thyroxine (L)                     | 51-48-9     | 0.4088 |
| Dichlorphenamide                  | 120-97-8    | 0.4088 |
| Tiaprofenic acid                  | 33005-95-7  | 0.4171 |
| Oxantel pamoate                   | 68813-55-8  | 0.4173 |
| Mebeverine hydrochloride          | 2753-45-9   | 0.4181 |
| Dofetilide                        | 115256-11-6 | 0.4209 |
| Tiapride hydrochloride            | 51012-33-0  | 0.4228 |
| Testosterone propionate           | 57-85-2     | 0.4280 |
| Bufexamac                         | 2438-72-4   | 0.4285 |
| Adiphenine hydrochloride          | 50-42-0     | 0.4287 |
| Fipexide hydrochloride            | 34161-23-4  | 0.4337 |
| Niridazole                        | 61-57-4     | 0.4347 |
| Homatropine hydrobromide (R,S)    | 51-56-9     | 0.4400 |
| Camlylofine chlorhydrate          | 54-30-8     | 0.4446 |
| Cefixime                          | 79350-37-1  | 0.4460 |
| Lamotrigine                       | 84057-84-1  | 0.4474 |
| Metaraminol bitartrate            | 33402-03-8  | 0.4496 |
| Ropinirrole hydrochloride         | 91374-20-8  | 0.4529 |
| Amoxicillin                       | 26787-78-0  | 0.4540 |
| Trolox                            | 53188-07-1  | 0.4564 |
| Aminopurine, 6-benzyl             | 1214-39-7   | 0.4569 |
| Hydrochlorothiazide               | 58-93-5     | 0.4578 |
| Butylparaben                      | 94-26-8     | 0.4597 |
| Novobiocin sodium salt            | 1476-53-5   | 0.4634 |
| (R)-Propranolol hydrochloride     | 13071-11-9  | 0.4652 |
| Ibutilide fumarate                | 122647-32-9 | 0.4689 |
| Moxisylyte hydrochloride          | 964-52-3    | 0.4693 |
| Pyrimethamine                     | 58-14-0     | 0.4696 |
| Thiostrepton                      | 1393-48-2   | 0.4718 |
| Bosentan                          | 147536-97-8 | 0.4724 |
| Griseofulvin                      | 126-07-8    | 0.4736 |
| Trimethadione                     | 127-48-0    | 0.4736 |
| Tropicamide                       | 1508-75-4   | 0.4736 |
| Clinafloxacin                     | 105956-97-6 | 0.4749 |
| Piracetam                         | 7491-74-9   | 0.4757 |
| Pemirolast potassium              | 100299-08-9 | 0.4765 |
| Streptomycin sulfate              | 3810-74-0   | 0.4791 |
| Clioquinol                        | 130-26-7    | 0.4816 |
| Mephentermine hemisulfate         | 1212-72-2   | 0.4841 |
| Fenipentol                        | 583-03-9    | 0.4860 |
| Triamcinolone                     | 124-94-7    | 0.4939 |
| Epirizole                         | 18694-40-1  | 0.4947 |
| Streptozotocin                    | 18883-66-4  | 0.4973 |
| Tocainide hydrochloride           | 71395-14-7  | 0.4983 |
| Eszopiclone                       | 138729-47-2 | 0.5005 |
| Azacyclonol                       | 115-46-8    | 0.5062 |
| Gentamicine sulfate               | 1405-41-0   | 0.5115 |
| Butoconazole nitrate              | 32872-77-1  | 0.5122 |
| Emedastine                        | 87233-61-2  | 0.5135 |
| Piroxicam                         | 36322-90-4  | 0.5141 |
| Rabeprazole Sodium salt           | 117976-89-3 | 0.5180 |
| Glafelamine hydrochloride         | 65513-72-6  | 0.5219 |
| Scopolamine hydrochloride         | 55-16-3     | 0.5225 |
| Kanamycin A sulfate               | 25389-94-0  | 0.5261 |
| (S)-(-)-Cycloserine               | 339-72-0    | 0.5283 |
| Norgestrel-(-)-D                  | 797-63-7    | 0.5297 |
| Galanthamine hydrobromide         | 19453       | 0.5303 |

|                                          |                                                   |         |
|------------------------------------------|---------------------------------------------------|---------|
| OXYTHIAMINE CHLORIDE HYDROCHLORIDE       | 614-05-1                                          | -0.3113 |
| 21-ACETOXYPREGNENOLONE                   | 566-78-9                                          | -0.3107 |
| ANTHRAQUINONE                            | 84-65-1                                           | -0.3073 |
| ABRINE (L)                               | 526-31-8                                          | -0.3061 |
| INAMRINONE                               | 60719-84-8                                        | -0.3054 |
| NIKETHAMIDE                              | 59-26-7                                           | -0.3046 |
| SPIRAMYCIN                               | 8025-81-8                                         | -0.3032 |
| DIMPYLATE                                | 333-41-5                                          | -0.3012 |
| RETORSINE                                | 480-54-6                                          | -0.3010 |
| BACCATIN III                             | 27548-93-2                                        | -0.3010 |
| DICHLOROPROP                             | 120-36-5                                          | -0.3010 |
| KYNURENIC ACID                           | 492-27-3                                          | -0.3004 |
| BERGENIN                                 | 108032-11-7 (hydrate)                             | -0.3000 |
| PODOTOTARIN                              |                                                   | -0.3000 |
| DEHYDROROTENONE                          | 30990-44-4                                        | -0.2988 |
| AZACITIDINE                              | 320-67-2                                          | -0.2986 |
| APOCYNIN                                 | 498-02-2                                          | -0.2975 |
| TRIAMCINOLONE                            | 124-94-7                                          | -0.2974 |
| GALANGIN TRIMETHYL ETHER                 | 26964-29-4                                        | -0.2951 |
| THEAFLAVIN MONOGALLATES                  |                                                   | -0.2934 |
| L-PHENYLALANINOL                         | 3182-95-4                                         | -0.2934 |
| ETHOXYQUIN                               |                                                   | -0.2909 |
| STRYCHNINE SULFATE                       | 60-41-3                                           | -0.2904 |
| ADENOSINE 5-MONOPHOSPHATE                | 61-19-8                                           | -0.2888 |
| CLOFARABINE                              | 123318-82-1                                       | -0.2880 |
| FENBUFEN                                 | 36330-85-5                                        | -0.2852 |
| VANILLIN                                 | 121-33-5                                          | -0.2835 |
| RONIDAZOLE                               | 7681-76-7                                         | -0.2824 |
| BACAMPICILLIN HYDROCHLORIDE              | 37661-08-8, 50972-17-3 [base]                     | -0.2818 |
| TENIPOSIDE                               | 29767-20-2                                        | -0.2818 |
| CITRONELLAL (R+)                         | 2385-77-5                                         | -0.2801 |
| XYLOSE                                   | 58-86-6                                           | -0.2801 |
| IODIPAMIDE                               | 606-17-7, 2618-26-0 [iodipamide]                  | -0.2771 |
| FLUNISOLIDE                              | 77326-96-6, 3385-03-3                             | -0.2768 |
| DICLORALUREA                             | 116-52-9                                          | -0.2763 |
| METHSCOPOLAMINE BROMIDE                  | 155-41-9                                          | -0.2763 |
| MESNA                                    | 19767-45-4, 3375-50-6 [2-mercaptoethanesulfonate] | -0.2728 |
| 2-HYDROXY-4-METHOXY-BENZOPHENONE         | 131-57-7                                          | -0.2726 |
| DEMETHYLNIBILETIN                        | 2174-59-6                                         | -0.2724 |
| IOXILAN                                  | 107793-72-6                                       | -0.2724 |
| GLIMEPIRIDE                              | 93479-97-1                                        | -0.2720 |
| DIMETHYLFRAXETIN                         | 6035-49-0                                         | -0.2719 |
| LOSARTAN                                 | 124750-99-8, 114798-26-4                          | -0.2710 |
| L-LEUCYL-L-ALANINE                       | 7298-84-2                                         | -0.2710 |
| HETEROPEUCENIN, METHYL ETHER             | 26213-95-6                                        | -0.2700 |
| 3-HYDROXYBENZYLHYDRAZINE DIHYDROCHLORIDE | 81012-99-9                                        | -0.2687 |
| DONEPEZIL HYDROCHLORIDE                  | 142057-77-0                                       | -0.2686 |
| CITALOPRAM HYDROBROMIDE                  | 59729-33-8                                        | -0.2680 |
| 7-DESHYDROXYPYROGALLIN-4-CARBOXYLIC ACID |                                                   | -0.2674 |
| ACETYLGLUCOSAMINE                        |                                                   | -0.2671 |
| 3',6-DIHYDROXYFLAVONE                    | 71592-46-6                                        | -0.2664 |
| DICTAMNINE                               | 484-29-7                                          | -0.2658 |
| ZALTOPROFEN                              | 74711-43-6                                        | -0.2656 |
| D-ERYTHOBIC ACID                         | 89-65-6                                           | -0.2641 |
| ACEDAPSONE                               | 77-46-3                                           | -0.2630 |
| TIMONACIC                                | 444-27-9                                          | -0.2626 |
| SULFANITRAN                              | 122-16-7                                          | -0.2618 |
| PIRIBEDIL HYDROCHLORIDE                  | 622744                                            | -0.2616 |
| DILTIAZEM HYDROCHLORIDE                  | 33286-22-5, 42399-41-7 [diltiazem]                | -0.2609 |
| PYROCATECHUIC ACID                       | 303-38-8                                          | -0.2596 |
| APIGENIN DIMETHYL ETHER                  | 5728-44-9                                         | -0.2589 |
| RACTOPAMINE HYDROCHLORIDE                | 90274-24-1                                        | -0.2579 |
| NADIFLOXACIN                             | 124858-35-1                                       | -0.2576 |
| PRIDINOL METHANESULFONATE                | 511-45-5                                          | -0.2572 |
| ALVERINE CITRATE                         | 5560-59-8, 150-59-4 [alverine]                    | -0.2558 |
| MEPHENESIN                               | 59-47-2                                           | -0.2546 |
| DIHYDROATRANORIN                         | 69168-12-3                                        | -0.2472 |
| SKYRIN                                   | 602-06-2                                          | -0.2464 |
| PHLORACETOPHENONE                        | 480-66-0                                          | -0.2463 |
| PIMOBENDAN                               | 74150-27-9                                        | -0.2436 |
| CHLOROPYRAMINE HYDROCHLORIDE             | 6170-42-9, 59-32-5 (base)                         | -0.2422 |
| ETHOSUXIMIDE                             | 77-67-8                                           | -0.2372 |
| SPARTEINE SULFATE                        | 6160-12-9, 299-39-8 [anhydrous]                   | -0.2357 |
| SULPIRIDE (S [-])                        | 15676-16-1                                        | -0.2345 |
| DIODOTYROSINE DIHYDRATE                  | 18835-59-1                                        | -0.2345 |
| PROCAINE HYDROCHLORIDE                   | 51-05-8, 59-46-1 [procaine]                       | -0.2343 |
| ISOFLUPREDONE ACETATE                    | 338-98-7                                          | -0.2324 |
| ANABASAMINE HYDROCHLORIDE                | 20410-87-1(base)                                  | -0.2321 |
| MINAPRINE HYDROCHLORIDE                  | 25953-17-7                                        | -0.2309 |

|                                           |             |        |
|-------------------------------------------|-------------|--------|
| Vincamine                                 | 1617-90-9   | 0.5305 |
| Nadolol                                   | 42200-33-9  | 0.5332 |
| Flavoxate hydrochloride                   | 3717-88-2   | 0.5351 |
| Ambroxol hydrochloride                    | 23828-92-4  | 0.5353 |
| Lithocholic acid                          | 434-13-9    | 0.5378 |
| Clopidogrel                               | 113665-84-2 | 0.5381 |
| Sotalol hydrochloride                     | 959-24-0    | 0.5381 |
| Cefazolin sodium salt                     | 27164-46-1  | 0.5404 |
| Sisomicin sulfate                         | 53179-09-2  | 0.5413 |
| Homoveratrylamine                         | 120-20-7    | 0.5418 |
| Sulfamethizole                            | 144-82-1    | 0.5441 |
| Amyleine hydrochloride                    | 532-59-2    | 0.5465 |
| Sulfamonomethoxine                        | 1220-83-3   | 0.5475 |
| Butenafine Hydrochloride                  | 101828-21-1 | 0.5485 |
| Atropine sulfate monohydrate              | 5908-99-6   | 0.5490 |
| Tizanidine hydrochloride                  | 51322-75-9  | 0.5492 |
| Probenecid                                | 57-66-9     | 0.5507 |
| Acarbose                                  | 56180-94-0  | 0.5524 |
| Voriconazole                              | 137234-62-9 | 0.5528 |
| Pyridostigmine iodide                     | 1017265     | 0.5578 |
| Enalapril maleate                         | 76095-16-4  | 0.5632 |
| Tobramycin                                | 32986-56-4  | 0.5673 |
| Baclofen (R,S)                            | 1134-47-0   | 0.5692 |
| Merbromin                                 | 129-16-8    | 0.5703 |
| Ribostamycin sulfate salt                 | 53797-35-6  | 0.5730 |
| Tigecycline                               | 220620-09-7 | 0.5736 |
| Phenacetin                                | 62-44-2     | 0.5770 |
| Metirapone                                | 54-36-4     | 0.5781 |
| Naproxen                                  | 22204-53-1  | 0.5781 |
| Cefuroxime sodium salt                    | 56238-63-2  | 0.5786 |
| Levodopa                                  | 59-92-7     | 0.5787 |
| Tolmetin sodium salt dihydrate            | 64490-92-2  | 0.5806 |
| Fosfosal                                  | 6064-83-1   | 0.5877 |
| Modafinil                                 | 68693-11-8  | 0.5888 |
| Vancomycin hydrochloride                  | 1404-93-9   | 0.5910 |
| Sulindac                                  | 38194-50-2  | 0.5919 |
| Oxfendazol                                | 53716-50-0  | 0.5930 |
| Cladribine                                | 4291-63-8   | 0.5932 |
| Suxibuzone                                | 27470-51-5  | 0.5950 |
| Meclofenamic acid sodium salt monohydrate | 6385-02-0   | 0.5960 |
| Dehydroisoandrosterone 3-acetate          | 853-23-6    | 0.5981 |
| Altretamine                               | 645-05-6    | 0.5994 |
| Atovaquone                                | 95233-18-4  | 0.6001 |
| Metrizamide                               | 31112-62-6  | 0.6007 |
| Montelukast                               | 158966-92-8 | 0.6012 |
| Zaprinast                                 | 37762-06-4  | 0.6018 |
| Homosalate                                | 118-56-9    | 0.6041 |
| Ethambutol dihydrochloride                | 1070-11-7   | 0.6071 |
| Fosinopril                                | 98048-97-6  | 0.6081 |
| Acetaminophen                             | 103-90-2    | 0.6103 |
| Oxandrolone                               | 53-39-4     | 0.6193 |
| Ritodrine hydrochloride                   | 23239-51-2  | 0.6196 |
| Saquinavir mesylate                       | 149845-06-7 | 0.6197 |
| Ranitidine hydrochloride                  | 66357-59-3  | 0.6210 |
| Ozagrel hydrochloride                     | 78712-43-3  | 0.6234 |
| Benoxinate hydrochloride                  | 5987-82-6   | 0.6287 |
| Methylethergometrine maleate              | 57432-61-8  | 0.6290 |
| Droperidol                                | 548-73-2    | 0.6395 |
| Brinzolamide                              | 138890-62-7 | 0.6413 |
| Artemisinin                               | 63968-64-9  | 0.6438 |
| Finasteride                               | 98319-26-7  | 0.6558 |
| Erythromycin                              | 114-07-8    | 0.6564 |
| Dropropizine (R,S)                        | 17692-31-8  | 0.6576 |
| Meticrane                                 | 1084-65-7   | 0.6592 |
| Xylometazoline hydrochloride              | 1218-35-5   | 0.6617 |
| Oxytetracycline dihydrate                 | 6153-64-6   | 0.6641 |
| Morantel tartrate                         | 26155-31-7  | 0.6650 |
| Pregnenolone                              | 145-13-1    | 0.6656 |
| Diphenidol hydrochloride                  | 3254-89-5   | 0.6709 |
| Ritonavir                                 | 155213-67-5 | 0.6712 |
| Etofilline                                | 519-37-9    | 0.6714 |
| Practolol                                 | 6673-35-4   | 0.6741 |
| Proglumide                                | 6620-60-6   | 0.6769 |
| Fursultiamine Hydrochloride               | 2105-43-3   | 0.6785 |
| Esmolol hydrochloride                     | 81161-17-3  | 0.6813 |
| Sibutramine hydrochloride                 | 125494-59-9 | 0.6830 |
| Bendroflumethiazide                       | 73-48-3     | 0.6847 |
| Prednisone                                | 53-03-2     | 0.6858 |
| Adapalene                                 | 106685-40-9 | 0.6922 |

|                                      |                             |         |
|--------------------------------------|-----------------------------|---------|
| CINNAMIC ACID                        | 621-82-9                    | -0.2298 |
| METHYL ORSELLINATE                   | 3187-58-4                   | -0.2298 |
| ANTHRALIN                            | 480-22-8, 1143-38-0         | -0.2284 |
| EPICATECHIN PENTAACETATE             |                             | -0.2282 |
| HESPERETIN                           | 520-33-2                    | -0.2257 |
| FLUDROCORTISONE ACETATE              | 514-36-3, 127-31-1 [fludroc | -0.2247 |
| MOMETASONE FUROATE                   | 83919-23-7                  | -0.2243 |
| 6-AMINONICOTINAMIDE                  | 329-89-5                    | -0.2237 |
| ACACETIN                             | 480-44-4                    | -0.2237 |
| ELLAGIC ACID                         | 476-66-4                    | -0.2217 |
| MIMOSINE                             | 500-44-7                    | -0.2214 |
| AFALANINE                            | 2901-75-9                   | -0.2207 |
| 2-ACETILPYRROLE                      | 1072-83-9                   | -0.2193 |
| PYRVINIUM PAMOATE                    | 3546-41-6                   | -0.2188 |
| CHLORTHALIDONE                       | 77-36-1                     | -0.2175 |
| CARNOSINE                            | 305-84-0                    | -0.2155 |
| BUTAMBEN                             | 94-25-7                     | -0.2135 |
| PROBENECID                           | 57-66-9                     | -0.2133 |
| BARBITAL                             | 57-44-3                     | -0.2113 |
| OCTODRINE                            | 543-82-8                    | -0.2106 |
| N-METHYLBENZYLAMINE HYDROCHLORIDE    | 13426-94-3, 103-67-3(base)  | -0.2105 |
| SULFISOXAZOLE                        | 127-69-5                    | -0.2105 |
| 2-HYDROXY-3,4-DIMETHOXYBENZOIC ACID  | 5653-46-3                   | -0.2102 |
| KANAMYCIN A SULFATE                  | 25389-94-0, 133-92-6 [repla | -0.2102 |
| ISORESERPINE                         | 482-85-9                    | -0.2090 |
| BENZOCLIDINE                         | 16852-81-6                  | -0.2084 |
| SINOMENINE                           | 115-53-7                    | -0.2076 |
| 5alpha-CHOLESTAN-3beta-OL-6-ONE      |                             | -0.2048 |
| ACONITIC ACID                        | 585-84-2                    | -0.2028 |
| RHODOCLADONIC ACID                   | 26984-15-6                  | -0.2023 |
| EMODIN                               | 518-82-1                    | -0.1995 |
| TYRAMINE                             | 51-67-2                     | -0.1982 |
| RALOXIFENE HYDROCHLORIDE             | 82640-04-8                  | -0.1982 |
| O-BENZYL-L-SERINE                    |                             | -0.1970 |
| MONOCROTALINE                        | 315-22-0                    | -0.1968 |
| ROBUSTIC ACID                        | 5307-59-5                   | -0.1966 |
| 11a-ACETOXYPROGESTERONE              | 2268-98-6                   | -0.1963 |
| AMINOSALICYLATE SODIUM               | 6018-19-5                   | -0.1963 |
| 3-AMINO-1,2,4-TRIAZOLE               | 61-82-5                     | -0.1961 |
| QUINESTROL                           | 152-43-2                    | -0.1940 |
| SODIUM CYCLAMATE                     | 100-88-9(acid)              | -0.1936 |
| FOSCARNET SODIUM                     | 63585-09-1                  | -0.1931 |
| THIOSTREPTON                         | 1393-48-2                   | -0.1924 |
| 3-METHOXYCATECHOL                    | 934-00-9                    | -0.1912 |
| FLUCYTOSINE                          | 2022-85-7                   | -0.1906 |
| CINTRIAMIDE                          | 5588-21-6                   | -0.1893 |
| PYRIPROXYFEN                         | 95737-68-1                  | -0.1893 |
| GRAYANOTOXIN I                       | 1030234                     | -0.1888 |
| LUPANYL ACID HYDROCHLORIDE           |                             | -0.1886 |
| ETIDRONATE DISODIUM                  | 7414-83-7                   | -0.1867 |
| ACETYLTRYPTOPHAN                     | 1218-34-4                   | -0.1867 |
| CARBENOXOLONE SODIUM                 | 7421-40-1, 5697-56-3 [carb  | -0.1863 |
| TINIDAZOLE                           | 19387-91-8                  | -0.1853 |
| OLOPATADINE HYDROCHLORIDE            | 140462-76-6                 | -0.1850 |
| 3-NOR-3-OXOPANASINSAN-6-OL           |                             | -0.1838 |
| BIOCHANIN A                          | 491-80-5                    | -0.1838 |
| ALEURETIC ACID                       | 533-87-9                    | -0.1824 |
| RETINYL ACETATE                      | 127-47-9                    | -0.1820 |
| HEPARIN SODIUM                       | 2608411                     | -0.1817 |
| PALIPERIDONE                         | 144598-74-4                 | -0.1815 |
| TOSUFLOXACIN TOLUENESULFONATE HYDRA  | 115964-29-9                 | -0.1813 |
| GLYCYRRHIZIC ACID, AMMONIUM SALT     | 1405-86-3                   | -0.1806 |
| SULFAMETHOXYPYRIDAZINE               | 80-35-3                     | -0.1783 |
| TRANILAST                            | 53902-12-8                  | -0.1746 |
| DIHYDROSTREPTOMYCIN SESQUISULFATE [5 | 128-46-1                    | -0.1745 |
| ACETYL EVERNINIC ACID                |                             | -0.1741 |
| ISOKOBUSONE                          | 24173-72-6                  | -0.1738 |
| CHRYSANTHEMIC ACID, ETHYL ESTER      | 97-41-6                     | -0.1735 |
| TRIMETHOPRIM                         | 738-70-5                    | -0.1730 |
| EPIGALLOCATECHIN-3-MONOGALLATE       | 989-51-5                    | -0.1719 |
| THEOPHYLLINE                         | 5967-84-0                   | -0.1715 |
| PROADIFEN HYDROCHLORIDE              | 62-68-0                     | -0.1712 |
| MORIN                                | 480-16-0                    | -0.1699 |
| FENBENDAZOLE                         | 43210-67-9                  | -0.1698 |
| ENOXACIN                             | 74011-58-8                  | -0.1695 |
| LAGOCHILIN                           | 23554-81-6                  | -0.1689 |
| FTAXILIDE                            | 19368-18-4                  | -0.1682 |
| SILIBININ                            | 22888-70-6                  | -0.1675 |
| URSODIOL                             | 128-13-2                    | -0.1649 |



|                                           |             |        |
|-------------------------------------------|-------------|--------|
| Zopiclone                                 | 43200-80-2  | 0.6961 |
| Granisetron                               | 109889-09-0 | 0.6995 |
| Methocarbamol                             | 532-03-6    | 0.6995 |
| Ethotoin                                  | 86-35-1     | 0.7024 |
| Pergolide mesylate                        | 66104-23-2  | 0.7048 |
| Clorgyline hydrochloride                  | 17780-75-5  | 0.7060 |
| Besifloxacin hydrochloride                | 141388-76-3 | 0.7068 |
| Pipemidic acid                            | 51940-44-4  | 0.7073 |
| Terazosin hydrochloride                   | 63590-64-7  | 0.7095 |
| Metronidazole                             | 443-48-1    | 0.7115 |
| Chloroxine                                | 773-76-2    | 0.7124 |
| Ornidazole                                | 16773-42-5  | 0.7125 |
| Yohimbine hydrochloride                   | 65-19-0     | 0.7131 |
| Abacavir Sulfate                          | 188062-50-2 | 0.7141 |
| Trioxsalen                                | 3902-71-4   | 0.7161 |
| Mianserine hydrochloride                  | 21535-47-7  | 0.7168 |
| Sulfaguandinine                           | 57-67-0     | 0.7176 |
| Guanfacine hydrochloride                  | 29110-48-3  | 0.7176 |
| Acamprostate calcium                      | 77337-73-6  | 0.7199 |
| Metformin hydrochloride                   | 1115-70-4   | 0.7202 |
| Midodrine hydrochloride                   | 3092-17-9   | 0.7229 |
| Bupropion hydrochloride                   | 31677-93-7  | 0.7234 |
| Bretylium tosylate                        | 61-75-6     | 0.7351 |
| Sulfipyrazone                             | 57-96-5     | 0.7358 |
| Propidium iodide                          | 25535-16-4  | 0.7435 |
| Nitrofurazone                             | 59-87-0     | 0.7439 |
| Spiroonolactone                           | 52-01-7     | 0.7461 |
| Hydralazine hydrochloride                 | 304-20-1    | 0.7483 |
| Algestone acetophenide                    | 24356-94-3  | 0.7502 |
| Phenoxybenzamine hydrochloride            | 63-92-3     | 0.7544 |
| Rifaximin                                 | 80621-81-4  | 0.7562 |
| Naltrexone hydrochloride dihydrate        | 16676-29-2  | 0.7574 |
| Ethinodiol diacetate                      | 297-76-7    | 0.7614 |
| Demecarium bromide                        | 56-94-0     | 0.7654 |
| Tropisetron hydrochloride                 | 105826-92-4 | 0.7712 |
| Estrone                                   | 53-16-7     | 0.7717 |
| Indapamide                                | 26807-65-8  | 0.7720 |
| Sulfaquinoxaline sodium salt              | 967-80-6    | 0.7723 |
| Amfepramone hydrochloride                 | 90-84-6     | 0.7770 |
| Timolol maleate salt                      | 26921-17-5  | 0.7813 |
| Alverine citrate salt                     | 5560-59-8   | 0.7822 |
| Zonisamide                                | 68291-97-4  | 0.7822 |
| Ciprofloxacin hydrochloride monohydrate   | 93107-08-5  | 0.7853 |
| Tetraethylenepentamine pentahydrochloride | 4961-41-5   | 0.7869 |
| Piperacillin sodium salt                  | 59703-84-3  | 0.7876 |
| Benidipine hydrochloride                  | 91599-74-5  | 0.7899 |
| Liranaftate                               | 88678-31-3  | 0.7926 |
| Pyridoxine hydrochloride                  | 58-56-0     | 0.7963 |
| Chicago sky blue 6B                       | 259444      | 0.7998 |
| Furazolidone                              | 67-45-8     | 0.8098 |
| Acebutolol hydrochloride                  | 34381-68-5  | 0.8103 |
| Meloxicam                                 | 71125-38-7  | 0.8154 |
| Benzthiazide                              | 91-33-8     | 0.8172 |
| Pentoxifylline                            | 1677687     | 0.8197 |
| Alcuronium chloride                       | 15180-03-7  | 0.8242 |
| Moroxidine hydrochloride                  | 3160-91-6   | 0.8263 |
| Folinic acid calcium salt                 | 6035-45-6   | 0.8347 |
| Diflunisal                                | 22494-42-4  | 0.8357 |
| Estramustine                              | 2998-57-4   | 0.8367 |
| Gallamine triethiodide                    | 65-29-2     | 0.8367 |
| Ticlopidine hydrochloride                 | 53885-35-1  | 0.8396 |
| Tolazoline hydrochloride                  | 59-97-2     | 0.8401 |
| Procaine hydrochloride                    | 51-05-8     | 0.8419 |
| Carisoprodol                              | 78-44-4     | 0.8419 |
| Meclocycline sulfosalicylate              | 73816-42-9  | 0.8448 |
| Cimetidine                                | 51481-61-9  | 0.8459 |
| Etifenin                                  | 63245-28-3  | 0.8494 |
| Verapamil hydrochloride                   | 152-11-4    | 0.8518 |
| Ofloxacin                                 | 82419-36-1  | 0.8533 |
| Josamycin                                 | 16846-24-5  | 0.8558 |
| Buspirone hydrochloride                   | 33386-08-2  | 0.8577 |
| Leflunomide                               | 75706-12-6  | 0.8606 |
| Ziprasidone Hydrochloride                 | 138982-67-9 | 0.8650 |
| Clindamycin hydrochloride                 | 21462-39-5  | 0.8651 |
| Pranlukast                                | 103177-37-3 | 0.8673 |
| Proadifen hydrochloride                   | 62-68-0     | 0.8734 |
| Tetracycline hydrochloride                | 64-75-5     | 0.8761 |
| Idoxuridine                               | 54-42-2     | 0.8763 |
| Nefazodone hydrochloride                  | 82752-99-6  | 0.8770 |

|                                                        |                              |         |
|--------------------------------------------------------|------------------------------|---------|
| BRIMONIDINE                                            | 59803-98-4                   | -0.1643 |
| TRIPLENNAMINE CITRATE                                  | 6138-56-3, 91-81-6 [tripeler | -0.1643 |
| ISOXICAM                                               | 34552-84-6                   | -0.1637 |
| PIRACETAM                                              | 7491-74-9                    | -0.1633 |
| PENICILLAMINE METHYL ESTER HYDROCHLO                   | 34297-27-3                   | -0.1629 |
| DIACERIN                                               | 13739-02-1                   | -0.1624 |
| XANTHONE                                               | 90-47-1                      | -0.1620 |
| AMPHOTERICIN B                                         | 1397-89-3                    | -0.1620 |
| CEFAMANDOLE SODIUM                                     | 34444-01-4                   | -0.1620 |
| DIMETRIDAZOLE                                          | 551-92-8                     | -0.1613 |
| COUMARIN                                               | 91-64-5                      | -0.1609 |
| SANTONIN                                               | 481-06-1                     | -0.1606 |
| alpha-CYANO-4-HYDROXYCINNAMIC ACID                     | 28166-41-8                   | -0.1605 |
| 6,2'-DIHYDROXYFLAVONE                                  | 92439-20-8                   | -0.1603 |
| TERPENE HYDRATE                                        | 201256                       | -0.1600 |
| 2,2'-AZO-bis-2-AMINOPROPANE                            | 2997-92-4                    | -0.1596 |
| BATYL ALCOHOL                                          | 544-62-7                     | -0.1591 |
| SYRINGIC ACID                                          | 530-57-4                     | -0.1584 |
| ALLOPREGNANOLONE                                       | 516-54-1                     | -0.1583 |
| PERILLIC ACID (-)                                      | 7694-45-3                    | -0.1577 |
| HYDROXYTOLUIC ACID                                     | 83-40-9                      | -0.1553 |
| DIBUCAINE                                              | 85-79-0, 61-12-1 [hydrochl   | -0.1549 |
| SULFAMERAZINE                                          | 127-79-7                     | -0.1542 |
| ANETHOLE                                               | 4180-23-8                    | -0.1529 |
| 5-CHLOROINDOLE-2-CARBOXYLIC ACID                       | 10517-21-2                   | -0.1520 |
| GALLIC ACID                                            | 149-91-7                     | -0.1520 |
| FLEROXACIN                                             | 79660-72-3                   | -0.1512 |
| 2,3,4-TRIMETHOXYPHENYLACETIC ACID                      | 22480-91-7                   | -0.1510 |
| DROPERIDOL                                             | 548-73-2                     | -0.1510 |
| PHENAZOPYRIDINE HYDROCHLORIDE                          | 136-40-3, 94-78-0 [phenazo   | -0.1503 |
| HOMIDIUM BROMIDE                                       | 1239-45-8                    | -0.1501 |
| HYDROQUINIDINE                                         | 1435-55-8                    | -0.1479 |
| MECYSTEINE HYDROCHLORIDE                               | 2485-62-3, 18598-63-5 [hyd   | -0.1472 |
| CIPROFIBRATE                                           | 52214-84-3                   | -0.1467 |
| 12-HYDROXY-4,4-BISNOR-4,8,11,13-PODOCARPATETRAEN-3-ONE |                              | -0.1463 |
| STIGMASTA-4,22-DIEN-3-ONE                              | 20817-72-5                   | -0.1453 |
| DANTROLENE SODIUM                                      | 24868-20-0, 14663-23-1 [ar   | -0.1451 |
| EPIGALLOCATECHIN                                       | 970-74-1                     | -0.1448 |
| XANTHURENIC ACID                                       | 59-00-7                      | -0.1440 |
| DEXPROPRANOLOL HYDROCHLORIDE [R(+)]                    | 13071-11-9                   | -0.1428 |
| HYDROXYTACRINE MALEATE                                 | 118909-22-1                  | -0.1423 |
| TRIFLURIDINE                                           | 70-00-8                      | -0.1423 |
| DICUMAROL                                              | 66-76-2 (acid)               | -0.1421 |
| SUMATRIPTAN                                            | 103628-46-2                  | -0.1409 |
| LEVOTHYRAXINE SODIUM                                   | 51-48-9                      | -0.1400 |
| CICLOPIROX OLAMINE                                     | 41621-49-2                   | -0.1399 |
| CILOSTAZOL                                             | 73963-72-1                   | -0.1387 |
| ACEBUTOLOL HYDROCHLORIDE                               | 34381-68-5, 37517-30-9 [ac   | -0.1379 |
| HYDROQUININE HYDROBROMIDE HYDRATE                      | 207386-86-5                  | -0.1374 |
| STAVUDINE                                              | 3056-17-5                    | -0.1359 |
| PHYSOSTIGMINE SALICYLATE                               | 57-64-7                      | -0.1356 |
| DOXYLAMINE SUCCINATE                                   | 562-10-7, 469-21-6 [doxylar  | -0.1352 |
| TETRACYCLINE HYDROCHLORIDE                             | 64-75-5                      | -0.1351 |
| DEACETOXY-7-OXOGEDUNIN                                 | 13072-74-7                   | -0.1346 |
| YOHIMBIC ACID HYDRATE                                  | 522-87-2                     | -0.1332 |
| CLIDINIUM BROMIDE                                      | 3485-62-9                    | -0.1318 |
| NITARSONE                                              | 98-72-6                      | -0.1318 |
| CARMUSTINE                                             | 154-93-8                     | -0.1308 |
| MEBEVERINE HYDROCHLORIDE                               | 2753-45-9, 3625-06-7 [meb    | -0.1308 |
| ATRACURIUM BESYLATE                                    | 64228-81-5                   | -0.1292 |
| ARACHIDONIC ACID                                       | 506-32-1                     | -0.1290 |
| CLOSAATEL                                              | 57808-65-8                   | -0.1290 |
| 7,3'-DIHYDROXYFLAVONE                                  | 108238-40-0                  | -0.1281 |
| POTASSIUM p-AMINOBENZOATE                              | 150-13-0 (acid)              | -0.1277 |
| ACTARIT                                                | 18699-02-2                   | -0.1271 |
| CYPROTERONE                                            | 2098-66-0                    | -0.1255 |
| ZOLPIDEM                                               | 82626-48-0                   | -0.1254 |
| CHLORMADINONE ACETATE                                  | 302-22-7                     | -0.1251 |
| JASMONE                                                | 488-10-8                     | -0.1251 |
| TEBUCONAZOLE                                           | 107534-96-3                  | -0.1244 |
| HEXETIDINE                                             | 141-94-6                     | -0.1230 |
| CEAROIN 3-METHYL ETHER                                 |                              | -0.1225 |
| BENZYL ISOTHIOCYANATE                                  | 622-78-6                     | -0.1210 |
| FLUOROMETHOLONE                                        | 426-13-1                     | -0.1207 |
| POMIFERIN TRIMETHYL ETHER                              |                              | -0.1190 |
| CINCHONIDINE                                           | 485-71-2                     | -0.1174 |
| EPROBEMIDE                                             | 87940-60-1                   | -0.1171 |
| BUTYLATED HYDROXYANISOLE                               | 25013-16-5                   | -0.1147 |
| ACEGLUTAMIDE                                           | 2490-97-3 (acid)             | -0.1124 |

|                                        |             |        |
|----------------------------------------|-------------|--------|
| Perospirone                            | 150915-41-6 | 0.8910 |
| Chenodiol                              | 474-25-9    | 0.8923 |
| Khellin                                | 82-02-0     | 0.8925 |
| Methylhydantoin-5-(L)                  | 40856-73-3  | 0.8969 |
| Flufenamic acid                        | 530-78-9    | 0.8972 |
| Adenosine 5'-monophosphate monohydrate | 18422-05-4  | 0.8980 |
| Todalazine hydrochloride               | 3778-76-5   | 0.9016 |
| Meclozine dihydrochloride              | 1104-22-9   | 0.9047 |
| Diltiazem hydrochloride                | 33286-22-5  | 0.9062 |
| Triflusal                              | 322-79-2    | 0.9074 |
| Carbadox                               | 1791337     | 0.9093 |
| Glycopyrrolate                         | 596-51-0    | 0.9099 |
| Thalidomide                            | 50-35-1     | 0.9121 |
| (+) -Levobunolol hydrochloride         | 47141-41-3  | 0.9129 |
| Acyclovir                              | 59277-89-3  | 0.9221 |
| Aminophylline                          | 317-34-0    | 0.9221 |
| Dehydrocholic acid                     | 81-23-2     | 0.9221 |
| Fenbufen                               | 36330-85-5  | 0.9252 |
| Carmofur                               | 61422-45-5  | 0.9316 |
| Luteolin                               | 491-70-3    | 0.9318 |
| Tribenoside                            | 10310-32-4  | 0.9377 |
| Flunarizine dihydrochloride            | 30484-77-6  | 0.9421 |
| Nalbuphine hydrochloride               | 23277-43-2  | 0.9436 |
| Sertaconazole nitrate                  | 99592-39-9  | 0.9484 |
| Dimethadione                           | 695-53-4    | 0.9562 |
| Chlormezanone                          | 80-77-3     | 0.9570 |
| Hyoscyamine (L)                        | 101-31-5    | 0.9573 |
| Miglitol                               | 72432-03-2  | 0.9583 |
| Sulfacetamide sodic hydrate            | 6209-17-2   | 0.9593 |
| Acemetacin                             | 53164-05-9  | 0.9635 |
| Bumetanide                             | 28395-03-1  | 0.9647 |
| Fenofibrate                            | 49562-28-9  | 0.9680 |
| Adrenosterone                          | 382-45-6    | 0.9697 |
| Norethynodrel                          | 68-23-5     | 0.9784 |
| Pyrazinamide                           | 98-96-4     | 0.9790 |
| Bicalutamide                           | 90357-06-5  | 0.9793 |
| Bromocryptine mesylate                 | 22260-51-1  | 0.9806 |
| Gabapentin                             | 60142-96-3  | 0.9834 |
| Carbachol                              | 51-83-2     | 0.9882 |
| Trifluridine                           | 70-00-8     | 0.9887 |
| Ethisterone                            | 434-03-7    | 0.9889 |
| Disopyramide                           | 671200      | 0.9921 |
| Oxprenolol hydrochloride               | 6452-73-9   | 0.9922 |
| Ethamivan                              | 304-84-7    | 0.9933 |
| Antipyrine                             | 60-80-0     | 1.0002 |
| Aliskiren hemifumarate                 | 173334-57-1 | 1.0071 |
| Colistin sulfate                       | 1264-72-8   | 1.0093 |
| Pyrilamine maleate                     | 59-33-6     | 1.0163 |
| Irinotecan hydrochloride trihydrate    | 136572-09-3 | 1.0186 |
| Rifampicin                             | 13292-46-1  | 1.0275 |
| Tetramisole hydrochloride              | 5086-74-8   | 1.0336 |
| Lomefloxacin hydrochloride             | 98079-52-8  | 1.0368 |
| Fludrocortisone acetate                | 514-36-3    | 1.0425 |
| Chlorphenisn carbamate                 | 886-74-8    | 1.0459 |
| Ethosuximide                           | 77-67-8     | 1.0485 |
| Cefotetan                              | 69712-56-7  | 1.0495 |
| Glipizide                              | 29094-61-9  | 1.0505 |
| Tolvaptan                              | 150683-30-0 | 1.0662 |
| Isocarboxazid                          | 59-63-2     | 1.0670 |
| Minaprine dihydrochloride              | 25953-17-7  | 1.0679 |
| Pheniramine maleate                    | 132-20-7    | 1.0687 |
| Ethionamide                            | 536-33-4    | 1.0748 |
| Trimethobenzamide hydrochloride        | 554-92-7    | 1.0760 |
| Diphemanil methylsulfate               | 62-97-5     | 1.0769 |
| Sulfaphenazole                         | 526-08-9    | 1.0769 |
| Carbamazepine                          | 298-46-4    | 1.0930 |
| Picotamide monohydrate                 | 80530-63-8  | 1.0942 |
| Captopril                              | 62571-86-2  | 1.0972 |
| Lynestrenol                            | 52-76-6     | 1.0994 |
| Lacosamide                             | 175481-36-4 | 1.1042 |
| Azilsartan kamedoxomil                 | 863031-21-4 | 1.1085 |
| Valacyclovir hydrochloride             | 124832-27-5 | 1.1105 |
| Estradiol Valerate                     | 979-32-8    | 1.1121 |
| Trazodone hydrochloride                | 25332-39-2  | 1.1231 |
| Antipyrine, 4-hydroxy                  | 1672-63-5   | 1.1247 |
| Didanosine                             | 69655-05-6  | 1.1255 |
| Tioconazole                            | 65899-73-2  | 1.1276 |
| Norethindrone                          | 68-22-4     | 1.1330 |
| Mafenide hydrochloride                 | 138-37-4    | 1.1368 |

|                                        |                             |         |
|----------------------------------------|-----------------------------|---------|
| VALACYCLOVIR HYDROCHLORIDE             | 124832-27-5                 | -0.1121 |
| FROVATRIPTAN SUCCINATE                 | 158747-02-5                 | -0.1096 |
| FAMPROFAZONE                           | 22881-35-2                  | -0.1074 |
| THIABENDAZOLE                          | 148-79-8                    | -0.1071 |
| AMLEXANOX                              | 68302-57-8                  | -0.1065 |
| HYDRALAZINE HYDROCHLORIDE              | 86-54-4                     | -0.1063 |
| ORLISTAT                               | 96829-58-2                  | -0.1039 |
| VIDARABINE                             | 24356-66-9                  | -0.1026 |
| PENFLURIDOL                            | 26864-56-2                  | -0.1001 |
| 6-(3,4-METHYLENEDIOXYSTYRYL)-alpha-PYR | 1219-50-7                   | -0.0990 |
| EPIANDROSTERONE                        | 481-29-8                    | -0.0971 |
| PHENETHYLAMINE HYDROCHLORIDE           | 156-28-5, 64-04-0 (base)    | -0.0953 |
| CEFDINIR                               | 91832-40-5                  | -0.0946 |
| DIHYDROJASMONIC ACID, METHYL ESTER     | 24851-98-7                  | -0.0920 |
| NIMUSTINE HYDROCHLORIDE                | 55661-38-6                  | -0.0887 |
| ACESULFAME POTASSIUM                   | 55589-62-3                  | -0.0884 |
| ERYTHROMYCIN ETHYLSUCCINATE            | 1264-62-6, 114-07-8 [erythr | -0.0881 |
| AZTREONAM                              | 78110-38-0                  | -0.0874 |
| CINOCTRAMIDE                           | 28598-08-5                  | -0.0866 |
| 8-HYDROXYCARAPINIC ACID                |                             | -0.0863 |
| 1,2-DIMETHYLHYDRAZINE HYDROCHLORIDE    | 306-37-6                    | -0.0848 |
| BEZAFIBRATE                            | 41859-67-0                  | -0.0845 |
| HYDROCHLOROTHIAZIDE                    | 58-93-5                     | -0.0845 |
| TANNIC ACID                            | 1401-55-4                   | -0.0839 |
| CARMINIC ACID                          | 1260-17-9                   | -0.0835 |
| SODIUM PHENYLACETATE                   | 114-70-5                    | -0.0831 |
| LORNOXICAM                             | 70374-39-9                  | -0.0828 |
| DOXOFYLLINE                            | 69975-86-6                  | -0.0822 |
| ARTEPAULIN                             | 13902-54-0                  | -0.0820 |
| PURPUGOLLIN                            | 569-77-7                    | -0.0820 |
| TANGERITIN                             | 481-53-8                    | -0.0795 |
| BENACTYZINE HYDROCHLORIDE              | 57-37-4                     | -0.0792 |
| DEFERASIROX                            | 0201530-41-8                | -0.0777 |
| APIXABAN                               | 503612-47-3                 | -0.0777 |
| TEPOXALIN                              | 103475-41-8                 | -0.0760 |
| DEACETOXY(7)-7-OXOKHIVORINIC ACID      |                             | -0.0733 |
| SULFASALAZINE                          | 599-79-1                    | -0.0714 |
| THIOGUANINE                            | 154-42-7, 5580-03-0 [hemif  | -0.0707 |
| EUPARIN                                | 532-48-9                    | -0.0705 |
| PICEID                                 | 27208-80-6                  | -0.0696 |
| ETHISTERONE                            | 434-03-7                    | -0.0692 |
| BAMBUTEROL HYDROCHLORIDE               | 81732-46-9                  | -0.0678 |
| ELTROMBOPAG                            | 496775-61-2                 | -0.0664 |
| RETINOL                                | 68-26-8                     | -0.0659 |
| ATENOLOL                               | 29122-68-7                  | -0.0646 |
| APIOLE                                 | 523-80-8                    | -0.0644 |
| KINETIN                                | 525-79-1                    | -0.0620 |
| DEHYDROCHOLATE SODIUM                  | 145-41-5                    | -0.0618 |
| SULFAPYRIDINE                          | 144-83-2                    | -0.0617 |
| 4-HYDROXYBENZOIC ACID                  |                             | -0.0612 |
| HOMOPTEROCARPIN                        | 606-91-7                    | -0.0593 |
| RESORCINOL                             | 108-46-3                    | -0.0593 |
| DANTHRON                               | 117-10-2                    | -0.0567 |
| DESOGESTREL                            | 54024-22-5                  | -0.0548 |
| TOBRAMYCIN                             | 32986-56-4                  | -0.0545 |
| PHENACETIN                             | 62-44-2                     | -0.0542 |
| TROPISETRON HYDROCHLORIDE              | 105826-92-4                 | -0.0525 |
| GRISEOFULVIC ACID                      | 469-54-5                    | -0.0514 |
| 2-CARENE-3-ONE                         |                             | -0.0513 |
| NOCODAZOLE                             | 31430-18-9                  | -0.0503 |
| ARTEMOTIL                              | 75887-54-6                  | -0.0478 |
| OXIGLUTATIONE                          | 27025-41-8                  | -0.0471 |
| DIHYDROJASMONIC ACID                   | 98674-52-3                  | -0.0470 |
| GIBBERELLIC ACID                       | 77-06-5                     | -0.0467 |
| MECLOFENOXATE HYDROCHLORIDE            | 3685-84-5, 51-68-3(base)    | -0.0466 |
| IPRONIAZID PHOSPHATE                   | 305-33-9                    | -0.0454 |
| PAEONOL                                | 552-41-0                    | -0.0452 |
| 2,4-DIMETHOXY-2'-HYDROXYCHALCONE       | 32272-18-7                  | -0.0449 |
| ENILCONAZOLE SULFATE                   | 58594-72-2; 35554-44-0 [bc  | -0.0449 |
| L(-)-SORBOSE                           | 87-79-6                     | -0.0447 |
| ROXARSONE                              | 121-19-7                    | -0.0443 |
| TULOBUTEROL HYDROCHLORIDE              | 41570-61-0                  | -0.0402 |
| 4-HYDROXYANTIPYRINE                    | 1672-63-5                   | -0.0400 |
| DIAYERIDINE                            | 5355-16-18                  | -0.0400 |
| EPALRESTAT                             | 82159-09-9                  | -0.0393 |
| 7-AMINOCEPHALOSPORANIC ACID            | 957-68-6                    | -0.0387 |
| LACCAIC ACID A                         | 15979-35-8                  | -0.0380 |
| ALOIN                                  | 5133-19-7                   | -0.0372 |
| ISOVANILLIN                            | 621-59-0                    | -0.0370 |

|                                   |               |        |
|-----------------------------------|---------------|--------|
| Pilocarpine nitrate               | 148-72-1      | 1.1415 |
| Isoniazid                         | 54-85-3       | 1.1537 |
| Pirenzepine dihydrochloride       | 29868-97-1    | 1.1559 |
| Phenelzine sulfate                | 156-51-4      | 1.1566 |
| Iohexol                           | 66108-95-0    | 1.1579 |
| Tibolone                          | 5630-53-5     | 1.1590 |
| Nimesulide                        | 51803-78-2    | 1.1611 |
| Stanozolol                        | 10418-03-8    | 1.1624 |
| Isoflupredone acetate             | 338-98-7      | 1.1667 |
| Tolbutamide                       | 64-77-7       | 1.1722 |
| Mephenesin                        | 59-47-2       | 1.1783 |
| Pioglitazone                      | 111025-46-8   | 1.1809 |
| Danazol                           | 17230-88-5    | 1.1818 |
| Ampyrone                          | 83-07-8       | 1.1833 |
| Chlorzoxazone                     | 95-25-0       | 1.1919 |
| Chlorothiazide                    | 58-94-6       | 1.1994 |
| Tranlycypromine hydrochloride     | 1986-47-6     | 1.2054 |
| Canrenoic acid potassium salt     | 102731        | 1.2070 |
| Neomycin sulfate                  | 1405-10-3     | 1.2122 |
| Prilocaine hydrochloride          | 1786-81-8     | 1.2154 |
| Trihexyphenidyl-D,L Hydrochloride | 58947-95-8    | 1.2154 |
| Sulpiride                         | 15676-16-1    | 1.2220 |
| Acetylsalicylsalicylic acid       | 530-75-6      | 1.2272 |
| Tranexamic acid                   | 1197-18-8     | 1.2337 |
| Panthenol (D)                     | 81-13-0       | 1.2377 |
| Gatifloxacin                      | 112811-59-3   | 1.2453 |
| Aceclofenac                       | 89796-99-6    | 1.2531 |
| Heptaminol hydrochloride          | 543-15-7      | 1.2534 |
| Glutethimide, para-amino          | 125-84-8      | 1.2539 |
| Clotrimazole                      | 23593-75-1    | 1.2626 |
| Quetiapine hemifumarate           | 111974-72-2   | 1.2743 |
| Fenspiride hydrochloride          | 1151830       | 1.2782 |
| Oxolinic acid                     | 14698-29-4    | 1.2801 |
| Gemcitabine                       | 95058-81-4    | 1.2846 |
| Clonidine hydrochloride           | 4205-91-8     | 1.2874 |
| Bupivacaine hydrochloride         | 18010-40-7    | 1.3034 |
| Minoxidil                         | 38304-91-5    | 1.3090 |
| Tosufloxacin hydrochloride        | 100490-36-6   | 1.3125 |
| Busulfan                          | 55-98-1       | 1.3157 |
| Gemfibrozil                       | 25812-30-0    | 1.3206 |
| Triamterene                       | 396-01-0      | 1.3241 |
| Pentolinium bitartrate            | 52-62-0       | 1.3250 |
| Molsidomine                       | 25717-80-0    | 1.3308 |
| Nitrofurantoin                    | 67-20-9       | 1.3324 |
| Dicyclomine hydrochloride         | 67-92-5       | 1.3430 |
| Pyrantel tartrate                 | 33401-94-4    | 1.3476 |
| Diethylcarbamazine citrate        | 1642-54-2     | 1.3542 |
| Diazoxide                         | 364-98-7      | 1.3677 |
| Mupirocin                         | 12650-69-0    | 1.3753 |
| Nomifensine maleate               | 32795-47-4    | 1.3886 |
| Norfloxacin                       | 70458-96-7    | 1.3925 |
| Doxycycline hydrochloride         | 10592-13-9    | 1.3948 |
| Oxymetazoline hydrochloride       | 151615        | 1.4269 |
| Dapson                            | 80-08-0       | 1.4403 |
| Amidopyrine                       | 58-15-1       | 1.4539 |
| Oxiconazole Nitrate               | 64211-46-7    | 1.4651 |
| Oxybutynin chloride               | 1508-65-2     | 1.4671 |
| Sulfadiazine                      | 68-35-9       | 1.4690 |
| Fulvestrant                       | 129453-61-8   | 1.4722 |
| Pargyline hydrochloride           | 306-07-0      | 1.4900 |
| Isotretinoin                      | 4759-48-2     | 1.4922 |
| Haloperidol                       | 52-86-8       | 1.4934 |
| Metoclopramide monohydrochloride  | 7232-21-5     | 1.4937 |
| Pivampicillin                     | 33817-20-8    | 1.5129 |
| Hydroflumethiazide                | 135-09-1      | 1.5131 |
| Nelfinavir mesylate               | 159989-65-8   | 1.5172 |
| Acetohexamide                     | 968-81-0      | 1.5348 |
| Cefotaxime sodium salt            | 64485-93-4    | 1.5379 |
| Riluzole hydrochloride            | not available | 1.5381 |
| Benzonatate                       | 104-31-4      | 1.5415 |
| Ethaverine hydrochloride          | 985-13-7      | 1.5451 |
| Diprophylline                     | 479-18-5      | 1.5594 |
| Azathioprine                      | 446-86-6      | 1.5714 |
| Thiamphenicol                     | 15318-45-3    | 1.5773 |
| Fusidic acid sodium salt          | 751-94-0      | 1.5775 |
| Azaguanine-8                      | 134-58-7      | 1.5922 |
| Famotidine                        | 76824-35-6    | 1.6009 |
| Mefenamic acid                    | 61-68-7       | 1.6180 |
| Phenformin hydrochloride          | 834-28-6      | 1.6343 |

|                                                |                            |         |
|------------------------------------------------|----------------------------|---------|
| LEAD ACETATE                                   | 301-04-2                   | -0.0363 |
| ANISODAMINE HYDROBROMIDE (+/-)                 | 17659-49-3                 | -0.0344 |
| ISOOSAJIN                                      | 5745-54-0                  | -0.0330 |
| 3-AMINOPROPIONITRILE FUMARATE                  | 2079-89-2                  | -0.0329 |
| VESAMICOL HYDROCHLORIDE                        | 120447-62-3                | -0.0327 |
| MEXILETINE HYDROCHLORIDE                       | 5370-01-4, 31828-71-4 [me  | -0.0325 |
| OXIRACETAM                                     | 62613-82-5                 | -0.0323 |
| TODRALAZINE HYDROCHLORIDE                      | 14679-73-3                 | -0.0320 |
| CAPRYLIDENE                                    | 538-23-8                   | -0.0316 |
| 7-DEHYDROXYCHOL-8(14)-ENIC ACID                |                            | -0.0308 |
| BENFLUOREX HYDROCHLORIDE                       | 23602-78-0                 | -0.0308 |
| AZADIRACTIN                                    | 11141-17-6                 | -0.0304 |
| ROLIPRAM                                       | 61413-54-5                 | -0.0281 |
| DIFLOXACIN HYDROCHLORIDE                       | 91296-86-5                 | -0.0275 |
| CHRYSIN                                        | 480-40-0                   | -0.0267 |
| EFLORNITHINE HYDROCHLORIDE HYDRATE             | 96020-91-6                 | -0.0266 |
| VINCAMINE                                      | 1617-90-9                  | -0.0263 |
| THIAMINE HYDROCHLORIDE                         | 67-03-8                    | -0.0258 |
| CYSTAMINE DIHYDROCHLORIDE                      | 56-17-7                    | -0.0237 |
| LACTOBIONIC ACID                               | 96-82-2                    | -0.0229 |
| FLUFENAMIC ACID                                | 530-78-9                   | -0.0227 |
| AMINOCAPROIC ACID HYDROCHLORIDE                | 4321-58-8                  | -0.0227 |
| beta-AMYRIN BENZOATE                           | 3607-93-0                  | -0.0215 |
| 16(17)-EPOXY-21-ACETOXY-5-PREGNENOLONE         |                            | -0.0210 |
| PROPARGITE                                     | 2312-35-8                  | -0.0181 |
| MESTRANOL                                      | 72-33-3                    | -0.0169 |
| PHLORIDZIN                                     | 60-81-1                    | -0.0169 |
| EMTRICITABINE                                  | 143491-57-0                | -0.0159 |
| OXICONAZOLE NITRATE                            | 64211-46-7                 | -0.0151 |
| EPIESTRIOL                                     | 547-81-9                   | -0.0141 |
| EUGENYL BENZOATE                               | 531-26-0                   | -0.0139 |
| METHYL DEOXYCHOLATE                            | 3245-38-3                  | -0.0132 |
| 4-(3-BUTOXY-4-METHOXYBENZYL)IMIDAZOL           | 29925-17-5                 | -0.0125 |
| MENAQUINONE-4                                  |                            | -0.0116 |
| AZELAIC ACID                                   | 123-99-9                   | -0.0111 |
| 2-THIOURACIL                                   | 141-90-2                   | -0.0106 |
| 2',2'-BISEPIGALLOLATECHIN DIGALLATE            |                            | -0.0106 |
| HYDRASTININE HYDROCHLORIDE                     | 4884-68-8, 6592-85-4 [hydr | -0.0104 |
| GUAIAZULENE                                    | 489-84-9                   | -0.0094 |
| PISCIDIC ACID                                  | 35388-57-9                 | -0.0084 |
| FLUBENDAZOLE                                   | 31430-15-6                 | -0.0076 |
| DEHYDROACETIC ACID                             | 520-45-6                   | -0.0075 |
| MONTELUKAST SODIUM                             | 151767-02-1                | -0.0069 |
| ESTRIOL TRIPROPIONATE                          | 2236-31-9                  | -0.0065 |
| SEROTONIN HYDROCHLORIDE                        | 50-67-9                    | -0.0055 |
| SECNIDAZOLE                                    | 3366-95-8                  | -0.0046 |
| IMIQUIMOD HYDROCHLORIDE                        | 99011-02-6 (base)          | -0.0039 |
| CACODYLIC ACID                                 | 75-60-5                    | -0.0031 |
| CAPTAN                                         | 133-06-2                   | -0.0022 |
| PROCARBAZINE HYDROCHLORIDE                     | 671-16-9                   | -0.0019 |
| BEXAROTENE                                     | 153559-49-0                | -0.0017 |
| 3-BENZYLOXY-4,4-BISNOR-8,11,13-PODOCARPATRIENE |                            | -0.0017 |
| CINOXACIN                                      | 28657-80-9                 | -0.0013 |
| 2-MERCAPTOBENZOTHAZOLE                         | 149-30-4                   | -0.0012 |
| 2-HYDROXY-5 (6)EPOXY-TETRAHYDROCARYOPHYLLENE   |                            | 0.0020  |
| 7-DEACETYLKHIVORIN                             |                            | 0.0028  |
| MANGIFERIN                                     | 4773-96-0                  | 0.0046  |
| ASIATICOSIDE                                   | 16830-15-2                 | 0.0057  |
| CHOLINE CHLORIDE                               | 67-48-1, 62-49-7 [choline] | 0.0060  |
| ERYTHROMYCIN STEARATE                          | 643-22-1; 114-07-8(base)   | 0.0076  |
| LOMUSTINE                                      | 13010-47-4                 | 0.0081  |
| TRANDOLAPRIL                                   | 87679-37-6                 | 0.0087  |
| OLMESARTAN MEDOXOMIL                           | 144689-63-4                | 0.0088  |
| METHYL EUDESMATE                               | 1916-07-0                  | 0.0092  |
| SULFAGUANIDINE                                 | 57-67-0                    | 0.0105  |
| ESTRAGOLE                                      | 140-67-0                   | 0.0110  |
| GLAFENINE                                      | 3820-67-5                  | 0.0125  |
| CARYOPHYLLENE [t(-)]                           | 87-44-5                    | 0.0129  |
| TRIBROMOETHANOL                                | 75-80-9                    | 0.0129  |
| MENTHYL BENZOATE                               | 71617-14-6                 | 0.0134  |
| SALSOLINE                                      | 89-31-6                    | 0.0144  |
| 2,4-DINITROPHENOL                              | 51-28-5                    | 0.0166  |
| VISNAGIN                                       | 82-57-5                    | 0.0169  |
| 2',4-DIHYDROXYCHALCONE                         | 13323-66-5                 | 0.0178  |
| ISOROTENONE                                    | 549-22-4                   | 0.0194  |
| CHOLESTEROL                                    | 57-88-5                    | 0.0205  |
| FORMONONETIN                                   | 485-72-3                   | 0.0216  |
| PUROMYCIN DIHYDROCHLORIDE                      | 58-58-2, 53-79-2 [puromyci | 0.0222  |
| ISOPIMPINELLIN                                 | 482-27-9                   | 0.0227  |

|                                            |             |        |
|--------------------------------------------|-------------|--------|
| Cinnarizine                                | 298-57-7    | 1.6484 |
| Zafirlukast                                | 107753-78-6 | 1.6612 |
| Etodolac                                   | 41340-25-4  | 1.6676 |
| Nicardipine hydrochloride                  | 54527-84-3  | 1.6726 |
| Lincosamin hydrochloride                   | 859-18-7    | 1.6919 |
| Tiratricol, 3,3',5-triiodothyroacetic acid | 51-24-1     | 1.6975 |
| Nifedazone                                 | 2139-47-1   | 1.7108 |
| Pentylentetrazole                          | 54-95-5     | 1.7189 |
| Probuco                                    | 23288-49-5  | 1.7215 |
| Allantoin                                  | 97-59-6     | 1.7274 |
| Niflumic acid                              | 4394-00-7   | 1.7612 |
| Lidocaine hydrochloride                    | 73-78-9     | 1.7714 |
| Nicorandil                                 | 65141-46-0  | 1.7729 |
| Ketoprofen                                 | 22071-15-4  | 1.8368 |
| Scopolamin-N-oxide hydrobromide            | 6106-81-6   | 1.8380 |
| Lisinopril                                 | 83915-83-7  | 1.8482 |
| lproniazide phosphate                      | 305-33-9    | 1.8529 |
| Isoconazole                                | 27523-40-6  | 1.8837 |
| Etoposide                                  | 33419-42-0  | 1.9510 |
| Fludarabine                                | 21679-14-1  | 2.0521 |
| Chloramphenicol                            | 56-75-7     | 2.0603 |
| Tolfenamic acid                            | 13710-19-5  | 2.0621 |
| Antimycin A                                | 1397-94-0   | 2.0643 |
| Rifapentine                                | 61379-65-5  | 2.1022 |
| Flutamide                                  | 13311-84-7  | 2.1038 |
| Econazole nitrate                          | 24169-02-6  | 2.1245 |
| GBR 12909 dihydrochloride                  | 67469-78-7  | 2.1364 |
| Trimethoprim                               | 738-70-5    | 2.1401 |
| Sulconazole nitrate                        | 61318-91-0  | 2.1493 |
| Levamisole hydrochloride                   | 16595-80-5  | 2.3180 |
| Miconazole                                 | 22916-47-8  | 2.4545 |
| Tolnaftate                                 | 2398-96-1   | 2.4910 |
| Flumequine                                 | 42835-25-6  | 2.5415 |
| Fenbendazole                               | 43210-67-9  | 3.0018 |
| Mebendazole                                | 31431-39-7  | 3.7493 |
| (-)-Eseroline fumarate salt                | 104015-29-4 |        |
| 4-aminosalicylic acid                      | 65-49-6     |        |
| Alexidine dihydrochloride                  | 22573-93-9  |        |
| Aminacrine                                 | 90-45-9     |        |
| Apramycin                                  | 37321-09-8  |        |
| Auranofin                                  | 34031-32-8  |        |
| Bethanechol chloride                       | 590-63-6    |        |
| Clonixin Lysinate                          | 55837-30-4  |        |
| Colchicine                                 | 64-86-8     |        |
| Cyclopentiazide                            | 742-20-1    |        |
| Cytarabine                                 | 147-94-4    |        |
| Daurorubicin hydrochloride                 | 23541-50-6  |        |
| Deptropine citrate                         | 2169-75-7   |        |
| Digoxin                                    | 20830-75-5  |        |
| Docetaxel                                  | 114977-28-5 |        |
| Doxorubicin hydrochloride                  | 25316-40-9  |        |
| Epirubicin hydrochloride                   | 56390-09-1  |        |
| Ethamsylate                                | 2624-44-4   |        |
| Flucloxacillin sodium                      | 1847-24-1   |        |
| Fluvastatin sodium salt                    | 93957-55-2  |        |
| Fluvoxamine maleate                        | 61718-82-9  |        |
| Guaiacol                                   | 90-05-1     |        |
| Halofantrine hydrochloride                 | 36167-63-2  |        |
| Isometheptene mucate                       | 7492-31-1   |        |
| Isosorbide mononitrate                     | 16051-77-7  |        |
| Levalbuterol hydrochloride                 | 50293-90-8  |        |
| Levopropoxyphene napsylate                 | 5714-90-9   |        |
| Loperamide hydrochloride                   | 34552-83-5  |        |
| Lovastatin                                 | 75330-75-5  |        |
| Mecamylamine hydrochloride                 | 826-39-1    |        |
| Mefloquine hydrochloride                   | 51773-92-3  |        |
| Meprylcaine hydrochloride                  | 956-03-6    |        |
| Meptazinol hydrochloride                   | 59263-76-2  |        |
| Methiazole                                 | 108579-67-5 |        |
| Milrinone                                  | 78415-72-2  |        |
| Misoprostol                                | 59122-46-2  |        |
| Mitoxantrone dihydrochloride               | 70476-82-3  |        |
| Molindone hydrochloride                    | 15622-65-8  |        |
| Naftopidil dihydrochloride                 | 57149-08-3  |        |
| Nandrolone                                 | 434-22-0    |        |
| Nifurtimox                                 | 23256-30-6  |        |
| Nocodazole                                 | 31430-18-9  |        |
| Oxibendazol                                | 20559-55-1  |        |
| Paclitaxel                                 | 33069-62-4  |        |

|                                                                                     |                               |        |
|-------------------------------------------------------------------------------------|-------------------------------|--------|
| 7,4'-DIHYDROXYFLAVONE                                                               | 2196-14-7                     | 0.0230 |
| ASPARTAME                                                                           | 22839-47-0                    | 0.0235 |
| VILAZODONE HYDROCHLORIDE                                                            | 163521-12-8 (base)            | 0.0235 |
| 1R,2S-PHENYLPROPYLAMINE                                                             | 14838-15-4                    | 0.0247 |
| BACITRACIN                                                                          | 1405-87-4                     | 0.0257 |
| HEDERAGENIN                                                                         | 465-99-6                      | 0.0265 |
| 2,6-DIHYDROXY-4-METHOXYTOLUENE                                                      |                               | 0.0269 |
| 4-ANISALDEHYDE                                                                      | 123-11-5                      | 0.0289 |
| SODIUM PHENYLBUTYRATE                                                               | 1716-12-7                     | 0.0289 |
| HYPOXANTHINE                                                                        | 68-94-0                       | 0.0290 |
| CEFIXIME                                                                            | 79350-37-1                    | 0.0291 |
| OXEDRINE                                                                            | 94-07-5                       | 0.0293 |
| PRULIFLOXACIN                                                                       | 123447-62-1                   | 0.0293 |
| CEFEPIME HYDROCHLORIDE                                                              | 123171-59-5                   | 0.0323 |
| ETHIONAMIDE                                                                         | 536-33-4                      | 0.0323 |
| ALTHIAZIDE                                                                          | 5588-16-9                     | 0.0324 |
| 5,7-DIHYDROXY-4-METHYLCOUMARIN                                                      |                               | 0.0325 |
| SPHONDIN                                                                            | 483-66-9                      | 0.0325 |
| DEXLANSOPRAZOLE                                                                     | 138530-94-6                   | 0.0325 |
| KYNURENINE                                                                          | 343-65-7                      | 0.0344 |
| NONIVAMIDE                                                                          | 2444-46-4                     | 0.0350 |
| KARANJIN                                                                            | 521-88-0                      | 0.0356 |
| AMINOLEVULINIC ACID HYDROCHLORIDE                                                   | 1297222                       | 0.0357 |
| ESTRONE BENZOATE                                                                    | 2393-53-5                     | 0.0358 |
| LINACLOTIDE (1 mg/ml)                                                               | 851199-59-2                   | 0.0375 |
| ANASTROZOLE                                                                         | 120511-73-1                   | 0.0401 |
| RESERPINE                                                                           | 50-55-5                       | 0.0415 |
| BENFOTIAMINE                                                                        | 22457-89-2                    | 0.0428 |
| HYDRASTINE (1R, 9S)                                                                 | 118-08-1                      | 0.0435 |
| CHLOROCRESOL                                                                        | 59-50-7                       | 0.0447 |
| FEROUS FUMARATE                                                                     | 141-01-5                      | 0.0457 |
| MEROPENEM                                                                           | 96036-03-2                    | 0.0461 |
| DIFUCOL HEXAMETHYL ETHER                                                            | 14262-07-8                    | 0.0463 |
| METHYL GAMBOGATE METHYL ETHER                                                       |                               | 0.0469 |
| PAZUFLOXACIN MESYLATE                                                               | 163680-77-1                   | 0.0469 |
| VERATRINE HYDROCHLORIDE                                                             | 17666-25-0; 62-59-9(cevadil)  | 0.0470 |
| CARISOPRODOL                                                                        | 78-44-4                       | 0.0477 |
| CORYNANTHINE                                                                        | 123333-62-0                   | 0.0480 |
| NEROLIDOL                                                                           | 7212-44-4                     | 0.0485 |
| 6-HYDROXYFLAVONE                                                                    | 6665-83-4                     | 0.0499 |
| 3alpha-ACETOXYDIHYDRODEOXYGEDUNIN                                                   |                               | 0.0514 |
| EDOXABAN TOSYLATE HYDRATE                                                           | 480449-71-6                   | 0.0515 |
| RIVASTIGMINE TARTRATE                                                               | 123441-03-2                   | 0.0520 |
| NIMESULIDE                                                                          | 51803-78-2                    | 0.0528 |
| AMILORIDE HYDROCHLORIDE                                                             | 17440-83-4, 2016-88-8 [anf]   | 0.0538 |
| NICOPHOLINE                                                                         | 492-85-3                      | 0.0540 |
| GOSSYPETIN                                                                          | 489-35-0                      | 0.0551 |
| SALSOLIDINE                                                                         | 493-48-1                      | 0.0557 |
| BENZOCAINE                                                                          | 94-09-7                       | 0.0575 |
| 12a-HYDROXY-9-DEMETHYLMUNDUSERONE-8-CARBOXYLIC ACID                                 |                               | 0.0579 |
| PHYTONADIONE [5mM]                                                                  | 84-80-0                       | 0.0582 |
| 3,7-DIMETHOXYFLAVONE                                                                | 20950-52-1                    | 0.0607 |
| RILUZOLE                                                                            | 1744-22-5                     | 0.0613 |
| TIAPRIDE HYDROCHLORIDE                                                              | 51012-32-9                    | 0.0614 |
| 4-METHYLESCULETIN                                                                   | 529-84-0                      | 0.0647 |
| CYCLANDELATE                                                                        | 456-59-7                      | 0.0663 |
| GANGALEOIDIN                                                                        | 55365-63-4                    | 0.0673 |
| CHOLESTERYL ACETATE                                                                 | 604-35-3                      | 0.0688 |
| KUHLMANNIN                                                                          |                               | 0.0690 |
| 2-HYDROXY-4-BENZOYLOXYPROIOPHENONE                                                  |                               | 0.0697 |
| LOXOPROFEN                                                                          | 68767-14-6                    | 0.0697 |
| GLUCOSAMINIC ACID                                                                   | 3646-68-2                     | 0.0706 |
| CARGLUMIC ACID                                                                      | 1188-38-1                     | 0.0709 |
| SUCCINYLACETONE                                                                     | 51568-18-4                    | 0.0711 |
| EMPAGLIFLOZIN                                                                       | 864070-44-0                   | 0.0729 |
| DIHYDROGAMBOGIC ACID                                                                |                               | 0.0741 |
| alpha-TOCHOPHEROL                                                                   | 59-02-9                       | 0.0745 |
| PERSEITOL HEPTAACETATE                                                              | 19147-10-5                    | 0.0772 |
| DEMECLOCYCLINE HYDROCHLORIDE                                                        | 127-33-3                      | 0.0779 |
| LEVOSIMENDAN                                                                        | 141505-33-1                   | 0.0783 |
| ARECOLINE HYDROBROMIDE                                                              | 300-08-3, 63-75-2 [arecoline] | 0.0809 |
| SPERMINE                                                                            | 71-44-3                       | 0.0816 |
| SULFAMETHAZINE                                                                      | 57-68-1                       | 0.0826 |
| BETHANECHOL CHLORIDE                                                                | 590-63-6, 674-38-4 [bethan]   | 0.0829 |
| DERACOXIB                                                                           | 169590-41-4                   | 0.0836 |
| RITANSERIN                                                                          | 87051-43-2                    | 0.0837 |
| IBUPROFEN                                                                           | 15687-27-1                    | 0.0841 |
| 2-METHYLENE-5-(2,5-DIOXOTETRAHYDROFURAN-3-YL)-6-OXO--10,10-DIHYDRO-2H-PYRIDIN-2-ONE |                               | 0.0845 |
| EDOXUDINE                                                                           | 15176-29-1                    | 0.0848 |

|                                    |             |  |
|------------------------------------|-------------|--|
| Pancuronium bromide                | 15500-66-0  |  |
| Parbendazole                       | 14255-87-9  |  |
| Penbutolol sulfate                 | 38363-32-5  |  |
| Perhexiline maleate                | 6724-53-4   |  |
| Perindopril                        | 82834-16-0  |  |
| Piperidolate hydrochloride         | 129-77-1    |  |
| Pitavastatin calcium               | 147511-69-1 |  |
| Podophyllotoxin                    | 518-28-5    |  |
| Prazosin hydrochloride             | 19237-84-4  |  |
| Prednicarbate                      | 73771-04-7  |  |
| Pronethalol hydrochloride          | 51-02-5     |  |
| Quinacrine dihydrochloride hydrate | 69-05-6     |  |
| Ranolazine                         | 95635-55-5  |  |
| Remoxipride Hydrochloride          | 73220-03-8  |  |
| Ribavirin                          | 36791-04-5  |  |
| Sertraline                         | 79617-96-2  |  |
| Spaglumic acid                     | 3106-85-2   |  |
| Sulfadoxine                        | 2447-57-6   |  |
| Tegaserod maleate                  | 189188-57-6 |  |
| Terfenadine                        | 50679-08-8  |  |
| Verteporfin                        | 129497-78-5 |  |
| Viomycin sulfate                   | 37883-00-4  |  |
| Vorinostat                         | 149647-78-9 |  |

|                                     |                             |        |
|-------------------------------------|-----------------------------|--------|
| PIPOBROMAN                          | 54-91-1                     | 0.0864 |
| ACETYL-L-LEUCINE                    | 99-15-0                     | 0.0869 |
| MOGUISTEINE                         | 119637-67-1                 | 0.0869 |
| PROCAINAMIDE HYDROCHLORIDE          | 614-39-1                    | 0.0871 |
| DIMETHADIONE                        | 695-53-4                    | 0.0876 |
| CEFUROXIME SODIUM                   | 56238-63-2                  | 0.0890 |
| CINCHOPHEN                          | 132-60-5                    | 0.0892 |
| OLTIPRAZ                            | 64224-21-1                  | 0.0897 |
| RESVERATROL 4'-METHYL ETHER         | 33626-08-3                  | 0.0906 |
| SPECTINOMYCIN HYDROCHLORIDE         | 22189-32-8, 21736-83-4 [ar  | 0.0926 |
| ACETYLGUTAMIC ACID                  | 1430871                     | 0.0928 |
| GUANABENZ ACETATE                   | 23256-50-0                  | 0.0928 |
| MADECASSIC ACID                     | 18449-41-7                  | 0.0936 |
| LECANORIC ACID                      | 480-56-8                    | 0.0939 |
| NATEGLINIDE                         | 105816-04-4                 | 0.0944 |
| SORBITOL                            | 50-70-4                     | 0.0958 |
| ESZOPICLONE                         | 138729-47-2                 | 0.0979 |
| NIPECOTIC ACID                      | 498-95-3                    | 0.0998 |
| CHLORMIDAZOLE                       | 3689-76-7                   | 0.1004 |
| HYDROXYPROGESTERONE CAPROATE        | 630-56-8                    | 0.1004 |
| 7-DEACETOXY-7-OXOKHIVORIN           | 15004-51-0                  | 0.1011 |
| KASUGAMYCIN HYDROCHLORIDE           | 19408-46-9, 6980-18-3 (bas  | 0.1016 |
| ABAMECTIN (avermectin B1a shown)    | 71751-41-2                  | 0.1016 |
| PAROXETINE HYDROCHLORIDE            | 78246-49-8, 61869-08-7(ba   | 0.1027 |
| TRANLYCYPROMINE SULFATE             | 13492-01-8, 155-09-9 [tran  | 0.1027 |
| LOBARIC ACID                        | 522-53-2                    | 0.1027 |
| TOLFENAMIC ACID                     | 13710-19-5                  | 0.1030 |
| XYLOMETAZOLINE HYDROCHLORIDE        | 1218-35-5, 526-36-3 [xylom  | 0.1035 |
| 3-DEACETYLKHIVORIN                  |                             | 0.1037 |
| XANTHOXYLIN                         | 90-24-4                     | 0.1044 |
| CLINDAMYCIN HYDROCHLORIDE           | 21462-39-5, 58207-19-5 [m   | 0.1051 |
| 7-OXOCALLITRISIC ACID, METHYL ESTER | 155473-19-1 (acid)          | 0.1054 |
| CRYOFLURANE                         | 76-14-2                     | 0.1056 |
| RHOIFOLIN                           | 17306-46-6                  | 0.1061 |
| NABUMETONE                          | 42924-53-8                  | 0.1063 |
| CEPHALEXIN                          | 23325-78-2, 15686-71-2 [ar  | 0.1064 |
| DEHYDROCHOLIC ACID                  | 81-23-2                     | 0.1085 |
| MESOTRIONE                          | 104206-82-8                 | 0.1094 |
| PYRANTEL PAMOATE                    | 22204-24-6, 15686-83-6 [py  | 0.1096 |
| DIMETHYLCAFFEIC ACID                | 14737-89-4                  | 0.1099 |
| PIPERINE                            | 94-62-2                     | 0.1105 |
| CHLORALOSE                          | 15879-93-3                  | 0.1124 |
| PHENIRAMINE MALEATE                 | 132-20-7, 86-21-5 [phenirar | 0.1124 |
| DIOXYBENZONE                        | 131-53-3                    | 0.1127 |
| TOMATIDINE HYDROCHLORIDE            | 69004-03-1                  | 0.1127 |
| DEOXYKHIVORIN                       |                             | 0.1137 |
| ACETAMINOPHEN                       | 103-90-2                    | 0.1168 |
| FLAVANONE                           | 487-26-3                    | 0.1177 |
| LEVOCARNITINE PROPIONATE HYDROCHLOR | 119793-66-7                 | 0.1180 |
| MEXAMINE                            | 608-07-1                    | 0.1184 |
| IDAZOXAN HYDROCHLORIDE              | 79944-58-4                  | 0.1191 |
| DAPOXETINE HYDROCHLORIDE            | 1299938-20-1                | 0.1200 |
| HALOPERIDOL                         | 52-86-8                     | 0.1206 |
| CEFOPERAZONE                        | 62893-20-3                  | 0.1216 |
| ATROPINE OXIDE                      | 4438-22-6                   | 0.1219 |
| AMINOPTERIN                         | 54-62-6, 58602-66-7 [aminoc | 0.1221 |
| STIGMASTEROL                        | 83-48-7                     | 0.1224 |
| ALLANTOIN                           | 97-59-6                     | 0.1234 |
| PROPANTHELINE BROMIDE               | 50-34-0, 298-50-0 [propantl | 0.1237 |
| SULFABENZAMIDE                      | 127-71-9                    | 0.1251 |
| FIROCOXIB                           | 189954-96-9                 | 0.1252 |
| DIMETHICONE (1%/ DMSO)              | 9016-00-6                   | 0.1256 |
| FOSFOSAL                            | 6064-83-1                   | 0.1262 |
| 2-METHOXY-4,5-METHYLENEDIOXYBENZALD | 5780-00-7                   | 0.1264 |
| TUAMINOHEPTANE SULFATE              | 6411-75-2, 123-82-0 [tuami  | 0.1273 |
| IOVERSOL                            | 8771-40-2                   | 0.1274 |
| CYCLOTHIAZIDE                       | 2259-96-3                   | 0.1275 |
| AGARIC ACID                         | 666-99-9                    | 0.1286 |
| DIALLYL SULFIDE                     | 592-88-1                    | 0.1289 |
| CHLORTETRACYCLINE HYDROCHLORIDE     | 64-72-2                     | 0.1302 |
| HEXAMETHONIUM BROMIDE               | 55-97-0, 60-26-4 [hexameth  | 0.1302 |
| TREHALOSE DIHYDRATE                 | 6138-23-4                   | 0.1302 |
| QUININE ETHYL CARBONATE             | 83-75-0                     | 0.1314 |
| PROPOFOL                            | 2078-54-8                   | 0.1319 |
| VANCOMYCIN HYDROCHLORIDE            | 1404-93-9, 1404-90-6 [vanc  | 0.1344 |
| ACETOSYRINGONE                      | 2478-38-8                   | 0.1352 |
| PYRITINOL                           | 1098-97-1                   | 0.1354 |
| DIBEKACIN                           | 34493-98-6                  | 0.1378 |
| DIHYDRODEHYDROEROSONE               |                             | 0.1401 |

|                                     |                             |        |
|-------------------------------------|-----------------------------|--------|
| CLONIXIN                            | 17737-65-4                  | 0.1422 |
| IRBESARTAN                          | 138402-11-6                 | 0.1425 |
| OXONITINE                           |                             | 0.1427 |
| CEFOTETAN                           | 6971256-7                   | 0.1432 |
| OXYTETRACYCLINE                     | 6153-64-6, 79-57-2 [anhydr  | 0.1484 |
| FAST GREEN FCF                      | 2353-45-9                   | 0.1493 |
| FENCLONINE (+/-)                    | 7424-00-2(dl); 14173-39-8(l | 0.1493 |
| AMINOGLUANIDINE SULFATE             | 996-19-0                    | 0.1500 |
| ZOMEPIRAC SODIUM                    | 64092-49-5, 64092-48-4 [ar  | 0.1504 |
| HYDROCORTISONE BUTYRATE             | 13609-67-1                  | 0.1510 |
| CARZENIDE                           | 138-41-0                    | 0.1524 |
| PIRINIXIC ACID                      | 50892-23-4                  | 0.1535 |
| LINEZOLID                           | 165800-03-3                 | 0.1538 |
| PIROMIDIC ACID                      | 19562-30-2                  | 0.1543 |
| QUINOXYFEN                          | 124495-18-7                 | 0.1559 |
| MEFENAMIC ACID                      | 61-68-7                     | 0.1561 |
| ALBUTEROL                           | 18559-94-9                  | 0.1565 |
| FLOPROPIONE                         | 2295-58-1                   | 0.1571 |
| CANRENOIC ACID, POTASSIUM SALT      | 2181-04-6, 4138-96-9 [canr  | 0.1576 |
| NITENPYRAM                          | 150824-47-8                 | 0.1577 |
| DOXIFLURIDINE                       | 436349                      | 0.1578 |
| PROTOPORPHYRIN IX                   | 553-12-8                    | 0.1592 |
| 3-beta-ACETOXYALLOPREG-16-EN-20-ONE |                             | 0.1606 |
| CALCIUM CHLORIDE                    | 10043-52-4                  | 0.1618 |
| NEBIVOLOL HYDROCHLORIDE             | 99200-09-6                  | 0.1626 |
| PENTOXIFYLLINE                      | 1677687                     | 0.1630 |
| 1-MONOPALMITIN                      | 542-44-9                    | 0.1641 |
| CYROMAZINE                          | 66215-27-8                  | 0.1645 |
| DIMINAZENE ACETURATE                | 908-54-3                    | 0.1651 |
| HYDROXYPROGESTERONE                 | 463130                      | 0.1653 |
| CHLOROBUTANOL                       | 57-15-8                     | 0.1657 |
| TRIADIMEFON                         | 43121-43-3                  | 0.1660 |
| meta-CRESYL ACETATE                 | 122-46-3                    | 0.1664 |
| LACTOSE MONOHYDRATE                 | 62-42-3                     | 0.1698 |
| alpha-TOCHOPHERYL ACETATE           | 58-95-7                     | 0.1704 |
| OXCARBAZEPINE                       | 28721-07-5                  | 0.1725 |
| SULFAMONOMETHOXINE                  | 1220-83-3                   | 0.1731 |
| OLEANOLIC ACID                      | 508-02-1                    | 0.1755 |
| N-METHYL-D-ASPARTIC ACID            | 6384-92-5                   | 0.1760 |
| HOMATROPINE METHYLBROMIDE           | 80-49-9, 87-00-3 [homatrop  | 0.1764 |
| TENOXICAM                           | 59804-37-4                  | 0.1769 |
| THEOBROMINE                         | 83-67-0 [base]              | 0.1776 |
| NALED                               | 300-76-5                    | 0.1781 |
| NALOXONE HYDROCHLORIDE              | 357-08-4, 51481-60-8 [dihy  | 0.1784 |
| AMBROXIDE (-)                       | 6790-58-5                   | 0.1832 |
| CEFOXITIN SODIUM                    | 66309-69-1, 61622-34-2 [ce  | 0.1849 |
| PALMIDROL [5mM]                     | 544-31-0                    | 0.1853 |
| ASPIRIN                             | 50-78-2                     | 0.1856 |
| FEXOFENADINE HYDROCHLORIDE          | 138452-21-8                 | 0.1862 |
| BUPROPION                           | 31677-93-7                  | 0.1882 |
| PHYSCION                            | 521-61-9                    | 0.1885 |
| DALBERGIONE                         | 28396-75-0                  | 0.1892 |
| OXANTEL PAMOATE                     | 68813-55-8                  | 0.1892 |
| ERYTHROMYCIN                        | 114-07-8                    | 0.1904 |
| PIOGLITAZONE HYDROCHLORIDE          | 112529-15-4                 | 0.1904 |
| FENOFIBRATE                         | 49562-28-9                  | 0.1911 |
| ASTAXANTHIN                         | 71772-51-5                  | 0.1914 |
| LEVOMILNACIPRAN HYDROCHLORIDE       | 175131-60-9                 | 0.1918 |
| IOHEXOL                             | 66108-95-0                  | 0.1921 |
| TELITHROMYCIN                       | 191114-48-4                 | 0.1931 |
| AGELASINE                           |                             | 0.1949 |
| CLOFOCTOL                           | 37693-01-9                  | 0.1949 |
| ATOMOXETINE HYDROCHLORIDE           | 82248-59-7                  | 0.1956 |
| AMINOGLUTETHIMIDE                   | 125-84-8                    | 0.1966 |
| PROTAMINE SULFATE [10mg/ ml]        | 53597-25-4                  | 0.1975 |
| PTHALYLSULFACETAMIDE                | 131-69-1                    | 0.1988 |
| POMIFERIN DIMETHYL ETHER            |                             | 0.2003 |
| SPIRONOLACTONE                      | 52-01-7                     | 0.2007 |
| ALANYL-DI-PHENYLALANINE             |                             | 0.2016 |
| ARTEMISININ                         | 63968-64-9                  | 0.2029 |
| GOSSYPOL                            | 303-45-7                    | 0.2029 |
| CHRYSAROBIN                         | 491-58-7                    | 0.2031 |
| ANISINDIONE                         | 117-37-3                    | 0.2039 |
| RIBAVIRIN                           | 36791-04-5                  | 0.2051 |
| HYGROMYCIN B                        | 31282-04-9                  | 0.2067 |
| LORGLUMIDE SODIUM                   | 97964-56-2 (acid)           | 0.2090 |
| CEFDITORIN PIVOXIL                  | 117467-28-4                 | 0.2093 |
| ORNITHINE aKETOGLUTARATE            | 5191-97-9, 70-26-8 (base)   | 0.2098 |
| BERGAPTEN                           | 484-20-8                    | 0.2117 |

|                                                   |                             |        |
|---------------------------------------------------|-----------------------------|--------|
| OXETHAZAINE                                       | 126-27-2                    | 0.2136 |
| CEPHALOTHIN SODIUM                                | 58-71-9, 153-61-7 [cephalot | 0.2139 |
| ACYCLOVIR                                         | 59277-89-3                  | 0.2141 |
| MEVALONIC ACID LACTONE                            | 503-48-0                    | 0.2144 |
| FOSFOMYCIN CALCIUM                                | 26472-47-9, 23112-90-5(aci  | 0.2146 |
| GLUTATHIONE                                       | 70-18-8                     | 0.2176 |
| PARGYLINE HYDROCHLORIDE                           | 306-07-0                    | 0.2184 |
| PHYTOL                                            | 7541-49-3                   | 0.2189 |
| OCTOPAMINE HYDROCHLORIDE                          | 104-14-3                    | 0.2195 |
| AMINOHIPURIC ACID                                 | 61-78-9, 94-16-6 [aminohip  | 0.2209 |
| CEPHRADINE                                        | 38821-53-3 [anhydrous], 58  | 0.2232 |
| LANOSTEROL ACETATE                                | 2671-68-3                   | 0.2245 |
| SODIUM LACTATE                                    | 72-17-3                     | 0.2257 |
| DIBENZOTHIOPHENE                                  | 132-65-0                    | 0.2263 |
| AMEZINIUM METILSULFATE                            | 30578-37-1                  | 0.2266 |
| PHENACYLAMINE HYDROCHLORIDE                       | 5468-37-1, 613-89-8(base)   | 0.2272 |
| COTININE                                          | 486-56-6, 5695-98-7[fumara  | 0.2277 |
| CEFPROZIL                                         | 121123-17-9                 | 0.2297 |
| RESORCINOL MONOACETATE                            | 102-29-4                    | 0.2317 |
| LEVOMENTHOL                                       | 2216-51-5                   | 0.2328 |
| OZAGREL HYDROCHLORIDE                             | 82571-53-7                  | 0.2343 |
| NARINGIN                                          | 10236-47-2                  | 0.2352 |
| PROTIONAMIDE                                      | 14222-60-7                  | 0.2355 |
| FLUMETHASONE                                      | 2135-17-3                   | 0.2359 |
| PASINIAZID                                        | 2066-89-9                   | 0.2359 |
| ACTEIN                                            | 18642-44-9                  | 0.2377 |
| ACADESINE                                         | 2627-69-2                   | 0.2386 |
| TETRAHYDROZOLINE HYDROCHLORIDE                    | 522-48-5, 84-22-0 [tetrahyd | 0.2388 |
| 4,4'-DIMETHOXYDALBERGIONE                         |                             | 0.2394 |
| THIOTEPA                                          | 52-24-4                     | 0.2399 |
| VANITOLIIDE                                       | 17692-71-6                  | 0.2430 |
| OSELTAMIVIR PHOSPHATE                             | 204255-11-8                 | 0.2436 |
| TRIGONELLINE                                      | 535-83-1                    | 0.2448 |
| BUFLOMEDIL HYDROCHLORIDE                          | 35543-24-9, 55837-25-7(ba   | 0.2452 |
| PTAEROXYLIN                                       | 14729-11-4                  | 0.2453 |
| TRILOSTANE                                        | 13647-35-3                  | 0.2464 |
| METHYL 7-DESACETYLKHIVORINATE                     |                             | 0.2470 |
| SELENOMETHIONINE                                  | 1464-42-2                   | 0.2473 |
| CHICAGO SKY BLUE                                  | 259444                      | 0.2474 |
| 7,2'-DIHYDROXYFLAVONE                             | 77298-66-9                  | 0.2491 |
| ADENINE                                           | 73-24-5                     | 0.2508 |
| FENOPROFEN                                        | 31879-05-7                  | 0.2524 |
| SMILAGENIN                                        | 126-18-1                    | 0.2525 |
| CETIRIZINE HYDROCHLORIDE                          | 83881-52-1                  | 0.2532 |
| 3,4'-DIHYDROXYFLAVONE                             | 14919-49-4                  | 0.2536 |
| BENZYLHYDRAZINE HYDROCHLORIDE                     | 3287-99-8; 100-46-9(base)   | 0.2546 |
| SALSALATE                                         | 552-94-3                    | 0.2561 |
| NICOTINYL ALCOHOL TARTRATE                        | 100-55-0                    | 0.2568 |
| CYTIDINE TRIPHOSPHATE DISODIUM                    | 65-47-4                     | 0.2570 |
| IRETOL                                            | 487-71-8                    | 0.2573 |
| SOLASODINE                                        | 126-17-0                    | 0.2583 |
| NITROFURAZONE                                     | 59-87-0                     | 0.2597 |
| AMITRAZ                                           | 33089-61-1                  | 0.2607 |
| DYCLONINE HYDROCHLORIDE                           | 536-43-6                    | 0.2608 |
| DEHYDRODEGUELIN                                   | 3466-23-7                   | 0.2609 |
| CANDESARTAN                                       | 139481-59-7                 | 0.2610 |
| FERULIC ACID                                      | 1135-24-6                   | 0.2611 |
| ICARIIN                                           | 489-32-7                    | 0.2616 |
| DIFLUNISAL                                        | 22494-42-4                  | 0.2625 |
| 3-HYDROXYQUINOXALINE CARBOXYLIC ACID              | 1204-75-7                   | 0.2626 |
| CHLORINDIONE                                      | 1146-99-2                   | 0.2629 |
| SULFAPHENAZOLE                                    | 526-08-9                    | 0.2641 |
| METHYL MANDELATE                                  | 4358-87-6                   | 0.2659 |
| HAEMATOXYLIN PENTAACETATE                         |                             | 0.2664 |
| 3-HYDROXY-4-(SUCCIN-2-YL)-CARYOLANE delta-LACTONE |                             | 0.2668 |
| CHLOROXYLENOL                                     | 88-04-0                     | 0.2684 |
| GLAUCONIC ACID                                    | 745-10-8                    | 0.2691 |
| HYDROQUINONE                                      | 123-31-9                    | 0.2719 |
| TRICHLORMETHINE HYDROCHLORIDE                     | 555-77-1                    | 0.2737 |
| D-(+)-MALTOSE                                     | 69-79-4                     | 0.2748 |
| IRIGENOL HEXAACETATE                              |                             | 0.2753 |
| 4-METHYLIMIDAZOLE                                 | 822-36-6                    | 0.2762 |
| DJENKOLIC ACID                                    | 28052-93-9                  | 0.2767 |
| HARMALINE                                         | 304-21-2                    | 0.2791 |
| NEPAFENAC                                         | 78281-72-8                  | 0.2791 |
| MEBHYDROLIN                                       | 524-81-2                    | 0.2796 |
| GADODIAMIDE                                       | 131410-48-5                 | 0.2808 |
| NORETHINDRONE                                     | 68-22-4                     | 0.2812 |
| PIPERACILLIN SODIUM                               | 59703-84-3, 66258-76-2 [pi  | 0.2818 |

|                                     |                            |        |
|-------------------------------------|----------------------------|--------|
| CHRYSANTHEMIC ACID                  | 10453-89-1                 | 0.2830 |
| INDOLE-3-CARBINOL                   | 700-06-1                   | 0.2862 |
| TROXIPIDE                           | 30751-05-4, 99777-81-8     | 0.2863 |
| FOLIC ACID                          | 59-30-3                    | 0.2866 |
| DICHLORODIPHENYLTRICHLOROETHANE     | 50-29-3                    | 0.2868 |
| ETHYL ORSELLINATE                   | 2524-37-0                  | 0.2873 |
| ANAZOLENE SODIUM                    | 3861-73-2                  | 0.2893 |
| SURAMIN HEXASODIUM                  | 129-46-4, 145-63-1 [surami | 0.2904 |
| LINDANE                             | 58-89-9                    | 0.2906 |
| CEFAMANDOLE NAFATE                  | 42540-40-9, 34444-01-4 [ce | 0.2926 |
| DIETHYLCARBAMAZINE CITRATE          | 1642-54-2                  | 0.2930 |
| 3,7-EPOXYCARYOPHYLLAN-6-OL          |                            | 0.2950 |
| FENTHION                            | 55-38-9                    | 0.2954 |
| HARMOL                              |                            | 0.2961 |
| CHROMOCARB                          | 4940-39-0                  | 0.2965 |
| QUINIZARIN                          | 81-64-1                    | 0.2971 |
| HYDROLYSIS PRODUCT OF BUSSEIN       |                            | 0.2973 |
| FURAZOLIDONE                        | 67-45-8                    | 0.2985 |
| URIDINE                             | 58-96-8                    | 0.2995 |
| ACEDOBEN                            | 556-08-1                   | 0.2997 |
| BECLAMIDE                           | 501-68-8                   | 0.3017 |
| CEPHALOSPORIN C Zn                  | 61-24-5                    | 0.3027 |
| BUTACAINE SULFATE                   | 149-15-5; 149-16-6 (base)  | 0.3027 |
| ZONISAMIDE                          | 68291-97-4                 | 0.3034 |
| AMCINONIDE                          | 51022-69-6                 | 0.3037 |
| SEDANOIC ACID                       | 6697-07-0                  | 0.3040 |
| DIOSMIN                             | 520-27-4                   | 0.3048 |
| ANAGRELIDE HYDROCHLORIDE            | 58579-51-4                 | 0.3053 |
| OROTIC ACID                         | 65-86-1                    | 0.3070 |
| CARBOPLATIN                         | 41575-94-4                 | 0.3075 |
| FLURBIPROFEN                        | 5104-49-4                  | 0.3075 |
| MERBROMIN                           | 129-16-8                   | 0.3075 |
| CLOFIBRIC ACID                      | 882-09-7                   | 0.3076 |
| PREDNISOLONE SODIUM PHOSPHATE       | 125-02-0                   | 0.3090 |
| SULFANILATE ZINC                    | 31884-76-1                 | 0.3093 |
| EPIANDROSTERONE BENZOATE            |                            | 0.3098 |
| SHIKIMIC ACID                       | 138-59-0                   | 0.3107 |
| CYANOCOBALAMIN                      | 68-19-9                    | 0.3110 |
| CEFAZOLIN SODIUM                    | 27164-46-1, 25953-19-9 [ce | 0.3121 |
| CEFACLOR                            | 70356-03-5, 53994-73-3 [ar | 0.3123 |
| CHOLESTAN-3-ONE                     | 566-88-1                   | 0.3124 |
| ALRESTATIN                          | 51411-04-2, 51876-97-2 [al | 0.3129 |
| CLOPIDOL                            | 2971-90-6                  | 0.3130 |
| SALIDROSIDE                         | 10338-51-9                 | 0.3132 |
| ACETOXOLONE                         |                            | 0.3133 |
| CLINDAMYCIN PALMITATE HYDROCHLORIDE | 25507--04-4                | 0.3134 |
| BISACODYL                           | 603-50-9                   | 0.3144 |
| PROBUCOL                            | 23288-49-5                 | 0.3146 |
| SCLAREOLIDE                         | 564-20-5                   | 0.3147 |
| TROXERUTIN                          | 7085-55-4                  | 0.3148 |
| IRSOGLADINE MALEATE                 | 84504-69-8, 57381-26-1 (ba | 0.3150 |
| DIFLUBENZURON                       | 35367-38-7                 | 0.3156 |
| AGOMELATINE                         | 138112-76-2                | 0.3157 |
| MEPHENTERMINE SULFATE               | 1212-72-2                  | 0.3157 |
| SODIUM OXYBATE                      | 502-85-2                   | 0.3157 |
| FIPEXIDE HYDROCHLORIDE              | 34161-24-5                 | 0.3165 |
| IZALPININ                           | 480-14-4                   | 0.3165 |
| FORMESTANE                          | 566-48-3                   | 0.3170 |
| SUVOREXANT                          | 1030377-33-3               | 0.3183 |
| PRASTERONE ACETATE                  | 853-23-6                   | 0.3187 |
| PHENACEMIDE                         | 63-98-9                    | 0.3201 |
| DEXIBUPROFEN                        | 51146-56-6                 | 0.3230 |
| 10-HYDROXYCAMPTOTHECIN              | 19685-09-7                 | 0.3234 |
| TENYLIDONE                          | 893-01-6                   | 0.3252 |
| PAROXYPROPIONE                      | 70-70-2                    | 0.3256 |
| OZAGREL HYDROCHLORIDE               | 74003-18-2, 82571-53-7(ba  | 0.3267 |
| CELECOXIB                           | 169590-42-5                | 0.3284 |
| ERYTHRITOL                          | 149-32-6                   | 0.3294 |
| ETEBENECID                          | 1213-06-5                  | 0.3314 |
| CARBARIL                            | 63-25-2                    | 0.3343 |
| CELLOBIOSE (D[+])                   | 528-50-7                   | 0.3343 |
| ERYTHROSE                           | 583-50-6                   | 0.3343 |
| ROTENONE                            | 83-79-4                    | 0.3343 |
| DIMESNA                             | 16208-51-8                 | 0.3394 |
| FLUNARIZINE HYDROCHLORIDE           | 30484-77-6, 52468-60-7 [fl | 0.3401 |
| PROPOXYCAINE HYDROCHLORIDE          | 550-83-4                   | 0.3404 |
| AMYLENE HYDRATE                     | 75-85-4                    | 0.3421 |
| BIOTIN                              | 58-85-5                    | 0.3422 |
| LEVOCETIRIZINE DIHYDROCHLORIDE      | 130018-77-8 (base)         | 0.3428 |



|                                         |                               |        |
|-----------------------------------------|-------------------------------|--------|
| LEVAMISOLE HYDROCHLORIDE                | 16595-80-5, 14769-73-4 [le    | 0.3429 |
| VOGLIBOSE                               | 83480-29-9                    | 0.3439 |
| trans,trans-FARNESOL                    | 4602-84-0                     | 0.3446 |
| TOLNAFTATE                              | 2398-96-1                     | 0.3450 |
| 8beta-HYDROXYCARAPIN, 3,8-HEMIACETAL    |                               | 0.3451 |
| MEXENEONE                               | 1641-17-4                     | 0.3456 |
| CHLORAMINE-T                            | 127-65-1                      | 0.3465 |
| AZLOCILLIN SODIUM                       | 37091-66-0                    | 0.3482 |
| SCOPOLAMINE HYDROBROMIDE                | 6533-68-2, 114-49-8 [anhyd    | 0.3501 |
| RANITIDINE HYDROCHLORIDE                | 66357-59-3; 66357-35-5        | 0.3503 |
| DEOXYCHOLIC ACID                        | 88-44-3                       | 0.3545 |
| CIPROFLOXACIN                           | 85721-33-1                    | 0.3562 |
| BERBERINE CHLORIDE                      | 633-65-8, 2086-83-1           | 0.3567 |
| RETUSIN                                 | 1245-15-4                     | 0.3570 |
| METHYL 6-HYDROXYANGOLENSATE             |                               | 0.3572 |
| DIPYRONE                                | 5907-38-0                     | 0.3577 |
| ESTRONE                                 | 53-16-7                       | 0.3587 |
| PHENOTHIAZINE                           | 92-94-2                       | 0.3604 |
| PRASUGREL                               | 150322-43-3                   | 0.3617 |
| IVABRADINE HYDROCHLORIDE                | 148849-67-6                   | 0.3618 |
| METARAMINOL BITARTRATE                  | 33402-03-8                    | 0.3629 |
| 5,7,4'-TRIMETHOXYISOFLAVONE             | 1162-82-9                     | 0.3644 |
| CEFTEZOLE                               | 26973-24-0                    | 0.3646 |
| PRENYLETIN                              | 15870-91-4                    | 0.3659 |
| CORTISONE ACETATE                       | 50-04-4, 53-06-5 [cortisone   | 0.3661 |
| LUFENURON                               | 103055-07-8                   | 0.3687 |
| ASPARAGINE (L) HYDRATE                  | 5794-13-8                     | 0.3688 |
| ACETYLCHOLINE CHLORIDE                  | 60-31-1, 51-84-3 [acetylcho   | 0.3692 |
| ETHENZAMIDE                             | 938-73-8                      | 0.3694 |
| TAURINE                                 | 107-35-7                      | 0.3726 |
| METHYL 3-DEOXY-3beta-HYDROXYANGOLENSATE |                               | 0.3729 |
| CHLORPYRIFOS                            | 2921-88-2                     | 0.3740 |
| PTHALYLSULFATHIAZOLE                    | 85-73-4                       | 0.3747 |
| CIANIDANOL [+catechin]                  | 154-23-4                      | 0.3751 |
| PENICILLIN G POTASSIUM                  | 69-57-8, 61-33-6 [penicillin, | 0.3753 |
| MECLOCYCLINE SULFOSALICYLATE            | 73816-42-9                    | 0.3754 |
| UTILIN                                  | 31218-22-1                    | 0.3757 |
| EUPATORIOCHROMENE                       | 19013-03-7                    | 0.3757 |
| BEXAROTENE                              | 153559-49-0                   | 0.3773 |
| DANAZOL                                 | 17230-88-5                    | 0.3776 |
| EVANS BLUE                              | 314-13-6                      | 0.3785 |
| DIENESTROL                              | 84-17-3, 13029-44-2 [//E,E/   | 0.3798 |
| D-LACTITOL MONOHYDRATE                  | 81025-04-9, 585-86-4          | 0.3806 |
| DEXFOSFOSERINE HYDROCHLORIDE            | 407-41-0                      | 0.3818 |
| FLUOCINONIDE                            | 356-12-7                      | 0.3828 |
| STREPTOMYCIN SULFATE [5mM; 10% aq DM    | 3810-74-0                     | 0.3833 |
| SALICYL ALCOHOL                         | 90-01-7                       | 0.3868 |
| ARGININE HYDROCHLORIDE                  | 1119-34-2                     | 0.3875 |
| NORDIHYDROGUARETIC ACID                 | 500-38-9                      | 0.3885 |
| SODIUM TETRADECYL SULFATE               | 139-88-8                      | 0.3885 |
| N-BENZOYLPHthalimide                    | 4583-50-0                     | 0.3921 |
| SUCRALOSE                               | 56038-13-2                    | 0.3923 |
| TIZANIDINE HYDROCHLORIDE                | 64461-82-1                    | 0.3932 |
| OXYPHENCYCLIMINE HYDROCHLORIDE          | 125-52-0, 125-53-1 [oxyphe    | 0.3947 |
| SULFINPYRAZONE                          | 57-96-5                       | 0.3947 |
| OXTRIPHYLLINE                           | 4499-40-5                     | 0.3953 |
| AMPICILLIN SODIUM                       | 69-52-3, 69-53-4 [ampicillin  | 0.3956 |
| GLYCYL-L-LEUCYL-L-PHENYLALANINE         |                               | 0.3956 |
| TENATOPRAZOLE                           | 113712-98-4                   | 0.3959 |
| HESPERIDIN                              | 520-26-3                      | 0.3987 |
| MEGLUMINE                               | 6284-40-8                     | 0.3988 |
| ALGINIC ACID [Mol Wt ~200,000; monomers | 9005-32-7                     | 0.3995 |
| UBIDECARENONE                           | 303-98-0                      | 0.3995 |
| MEPRYLCAINE HYDROCHLORIDE               | 956-03-6                      | 0.4007 |
| LIMONIN                                 | 1180-71-8                     | 0.4019 |
| VULPINIC ACID                           | 521-52-8                      | 0.4022 |
| DIETHYLSTILBESTROL                      | 56-53-1                       | 0.4059 |
| PELLETIERINE HYDROCHLORIDE              | 5984-61-2                     | 0.4068 |
| SULFACETAMIDE                           | 144-80-9, 127-56-0 [anhydr    | 0.4072 |
| CISPLATIN                               | 15663-27-1                    | 0.4090 |
| ACETYSALICYLANILIDE                     | 87-17-2                       | 0.4097 |
| PERILLYL ALCOHOL                        | 536-59-4, 18457-55-1          | 0.4097 |
| CLOFIBRATE                              | 637-07-0                      | 0.4115 |
| THIOCTIC ACID                           | 1077-24-7                     | 0.4130 |
| TILMICOSIN                              | 108050-54-0                   | 0.4130 |
| IRINOTECAN HYDROCHLORIDE                | 136572-09-3                   | 0.4132 |
| MANNITOL                                | 69-65-8                       | 0.4137 |
| AMOXICILLIN                             | 61336-70-7, 26787-78-0 [ar    | 0.4144 |
| HYOSCYAMINE                             | 101-31-5                      | 0.4148 |

|                                 |                                      |        |
|---------------------------------|--------------------------------------|--------|
| PAROMOMYCIN SULFATE             | 1263-89-4, 7542-37-2 [paromomycin]   | 0.4150 |
| THREONINE (dl)                  | 924-49-2                             | 0.4155 |
| QUINETHAZONE                    | 73-49-2                              | 0.4163 |
| URSOLOLACTONE ACETATE           | 28290-51-9                           | 0.4170 |
| NIFUROXAZIDE                    | 965-52-6                             | 0.4172 |
| MONOBENZONE                     | 103-16-2                             | 0.4186 |
| PYRONARIDINE TETRAPHOSPHATE     | 76748-86-2                           | 0.4193 |
| PALMATINE                       | 3486-67-7                            | 0.4199 |
| AMIFOSTINE                      | 20537-88-6                           | 0.4220 |
| CLINAFOXACIN HYDROCHLORIDE      | 105956-99-8                          | 0.4229 |
| LITHIUM CITRATE HYDRATE         | 6080-58-6, 919-16-4 [anhydrous]      | 0.4232 |
| L-DEOXYALLIIN                   | 21593-77-1                           | 0.4236 |
| GLUTAMINE (D)                   | 1825942                              | 0.4237 |
| COTARNINE CHLORIDE              | 10018-19-6, 82-54-2 [cotarnine]      | 0.4240 |
| BILIRUBIN                       | 635-65-4                             | 0.4243 |
| ANTIPYRINE                      | 60-80-0                              | 0.4269 |
| DICHLORISONE ACETATE            | 79-61-8                              | 0.4276 |
| 16(17)-EPOXY-5-PREGNENOLONE     |                                      | 0.4284 |
| LARIXOL ACETATE                 |                                      | 0.4292 |
| DEXRAZOXANE                     | 24584-09-6                           | 0.4305 |
| NALTREXONE HYDROCHLORIDE        | 16676-29-2, 16590-41-3 [naltrexone]  | 0.4313 |
| QUININE                         | 130-95-0                             | 0.4324 |
| VALINE (L)                      | 72-18-4                              | 0.4332 |
| METHACYCLINE HYDROCHLORIDE      | 3963-95-9, 914-00-1 [methacycline]   | 0.4337 |
| MODAFINIL                       | 68693-11-8                           | 0.4339 |
| ACETYLSEROTONIN                 | 1210-83-9                            | 0.4341 |
| PIRENZEPINE HYDROCHLORIDE       | 29868-97-1, 28797-61-7 [pirenzepine] | 0.4341 |
| PHENELZINE SULFATE              | 156-51-4, 51-71-8 [phenelzine]       | 0.4341 |
| DEOXYADENOSINE                  | 16373-93-6                           | 0.4345 |
| FIPRONIL                        | 120068-37-3                          | 0.4348 |
| NARINGENIN                      | 480-41-1                             | 0.4351 |
| LIDOCAINE HYDROCHLORIDE         | 6108-05-0, 73-78-9 [anhydrous]       | 0.4362 |
| SEMUSTINE                       | 13909-09-6                           | 0.4367 |
| PROPIOLACTONE                   | 57-57-8                              | 0.4378 |
| DOMPERIDONE                     | 57808-66-9                           | 0.4383 |
| PICROTOXININ                    | 17617-45-7                           | 0.4417 |
| XYLAZINE                        | 23076-35-9, 7361-61-7 [xylazine]     | 0.4437 |
| DIPLOSALSALATE                  | 530-75-6                             | 0.4437 |
| PHENFORMIN HYDROCHLORIDE        | 834-28-6                             | 0.4440 |
| LAPACHENOL                      | 573-13-7                             | 0.4447 |
| DAIDZEIN                        | 486-66-8                             | 0.4456 |
| GRAMICIDIN (gramicidin A shown) | 1405-97-6                            | 0.4485 |
| MEPIVACAINE HYDROCHLORIDE       | 1722-62-9, 96-88-8 [mepivacaine]     | 0.4494 |
| INOSITOL                        | 87-89-8                              | 0.4506 |
| PROPOXUR                        | 114-26-1                             | 0.4526 |
| SODIUM SALICYLATE               | 54-21-7                              | 0.4534 |
| BUSSEIN                         | 41060-14-4                           | 0.4545 |
| SERINE (L)                      | 56-45-1                              | 0.4571 |
| BENDIOCARB                      | 22781-23-3                           | 0.4578 |
| MOEXIPRIL HYDROCHLORIDE         | 82586-52-5                           | 0.4582 |
| HECOGENIN ACETATE               | 915-35-5                             | 0.4620 |
| alpha-TOXICAROL (dl)            | 82-09-7                              | 0.4638 |
| BICUCULLINE (+)                 | 485-49-4                             | 0.4645 |
| CAFFEINE HYDROBROMIDE           | 5743-18-0                            | 0.4645 |
| FLUMEQUINE                      | 42835-25-6                           | 0.4651 |
| ONONETIN                        | 487-49-0                             | 0.4658 |
| CHOLESTERYL HEMISUCCINATE       | 1510-21-0                            | 0.4668 |
| ARMODAFINIL                     | 112111-43-0                          | 0.4671 |
| EVERNINIC ACID                  | 570-10-5                             | 0.4672 |
| ISOSORBIDE MONONITRATE          | 16051-77-7                           | 0.4679 |
| TRIFLUMURON                     | 64628-44-0                           | 0.4687 |
| ORBIFLOXACIN                    | 113617-63-3                          | 0.4699 |
| AMANTADINE HYDROCHLORIDE        | 665-66-7, 768-94-5 [amantadine]      | 0.4712 |
| D-PHENYLALANINE                 | 673-06-3                             | 0.4714 |
| EPIAFZELECHIN (2R,3R)(-)        | 24808-04-6                           | 0.4715 |
| TRIACETIN                       | 102-76-1                             | 0.4720 |
| TRIAMCINOLONE ACETONIDE         | 76-25-5                              | 0.4729 |
| 6,3'-DIMETHOXYFLAVONE           | 79786-40-6                           | 0.4730 |
| LEVOCARNITINE                   | 541-15-1                             | 0.4754 |
| HOMOSALATE                      | 118-56-9                             | 0.4755 |
| QUINAPRIL                       | 85441-61-8                           | 0.4763 |
| AMINOTHIAZOLE                   | 96-50-4                              | 0.4776 |
| SELAMECTIN                      | 165108-07-6                          | 0.4802 |
| THEAFLAVIN DIGALLATE            | 30462-35-2                           | 0.4803 |
| AGMATINE SULFATE                | 2482-00-0                            | 0.4811 |
| CREATININE                      | 60-27-5                              | 0.4813 |
| OXALIPLATIN                     | 61825-94-3                           | 0.4819 |
| PYRILAMINE MALEATE              | 59-33-6, 91-84-9 [pyrilamine]        | 0.4822 |
| ORNITHINE HYDROCHLORIDE         | 70-26-8                              | 0.4831 |

|                                       |                            |        |
|---------------------------------------|----------------------------|--------|
| ALLOPURINOL                           | 315-30-0                   | 0.4836 |
| SULBENTINE                            | 350-12-9                   | 0.4859 |
| d,l-threo-3-HYDROXYASPARTIC ACID      | 4294-45-5                  | 0.4875 |
| AKLOMIDE                              | 3011-89-0                  | 0.4879 |
| beta-CARYOPHYLLENE ALCOHOL            | 472-97-9                   | 0.4883 |
| BROMOCRIPTINE MESYLATE                | 22260-51-1, 25614-03-3 [br | 0.4884 |
| LEVOFLOXACIN                          | 138199-71-0                | 0.4884 |
| GOSSYPOL-ACETIC ACID COMPLEX          |                            | 0.4892 |
| SULFATHIAZOLE                         | 72-14-0                    | 0.4900 |
| INDOMETHACIN                          | 53-86-1                    | 0.4902 |
| THIAMPHENICOL                         | 15318-45-3                 | 0.4902 |
| 4-HYDROXYINDOLE                       | 2380-94-1                  | 0.4916 |
| NIFEDIPINE                            | 21829-25-4                 | 0.4941 |
| BUTENAFINE HYDROCHLORIDE              | 101827-46-7                | 0.4943 |
| CHOLIC ACID                           | 81-25-4                    | 0.4943 |
| DOPAMINE HYDROCHLORIDE                | 62-31-7, 51-61-6 [dopamine | 0.4946 |
| MIANSERIN HYDROCHLORIDE               | 21535-47-7, 24219-97-4 [m  | 0.4952 |
| CLIMBAZOLE                            | 38083-17-9                 | 0.4955 |
| AZILSARTAN MEDOXOMIL                  | 863031-24-7                | 0.4955 |
| ISOCONAZOLE NITRATE                   | 24168-96-5                 | 0.4976 |
| BENZANTHRONE                          | 82-05-3                    | 0.4977 |
| 3beta-HYDROXYDEOXODIHYDRODEOXYGEDUNIN |                            | 0.4998 |
| MITRAPHYLLINE                         | 509-80-8                   | 0.5001 |
| CHAULMOOGRIC ACID                     | 502-30-7                   | 0.5003 |
| KHAYASIN C                            |                            | 0.5019 |
| PERINDOPRIL ERBUMINE                  | 107133-36-8; 82834-16-0 (p | 0.5021 |
| FAMOTIDINE                            | 76824-35-6                 | 0.5046 |
| DOXAPRAM HYDROCHLORIDE                | 7081-53-0                  | 0.5050 |
| RIFAXIMIN                             | 80621-81-4                 | 0.5053 |
| ETHACRYNIC ACID                       | 58-54-8                    | 0.5064 |
| CEFADROXIL                            | 66592-87-8, 50370-12-2 [ar | 0.5098 |
| MELPERONE HYDROCHLORIDE               | 3575-80-2                  | 0.5123 |
| RIZATRIPTAN BENZOATE                  | 144034-80-0                | 0.5131 |
| 4-HYDROXYBENZYL ALCOHOL               | 623-05-2                   | 0.5152 |
| EPINASTINE HYDROCHLORIDE              | 80012-43-7                 | 0.5178 |
| BUSULFAN                              | 55-98-1                    | 0.5179 |
| ACEMETACIN                            | 53164-05-9                 | 0.5186 |
| MATRINE                               | 519-02-8                   | 0.5193 |
| 3beta-ACETOXYDEOXODIHYDROGEDUNIN      |                            | 0.5195 |
| DOBUTAMINE HYDROCHLORIDE              | 49745-95-1, 34368-04-2 [dc | 0.5197 |
| ACECAINIDE HYDROCHLORIDE              | 34118-92-8, 32795-44-1 [ac | 0.5214 |
| PANTOPRAZOLE                          | 102625-70-7                | 0.5222 |
| DINITOLMIDE                           | 148-01-6                   | 0.5234 |
| LABETALOL HYDROCHLORIDE               | 32780-64-6                 | 0.5244 |
| alpha-HYDROXYDEOXYCHOLIC ACID         | 83-49-8                    | 0.5257 |
| CYCLOSERINE (D)                       | 68-41-7                    | 0.5266 |
| PIPEMIDIC ACID                        | 51940-44-4 (acid)          | 0.5279 |
| AURAPTENE                             | 495-02-3                   | 0.5307 |
| FENOFIBRIC ACID                       | 42017-89-0                 | 0.5342 |
| CANDESARTAN CILEXTIL                  | 139481-59-7                | 0.5362 |
| PICONOL                               | 586-98-1                   | 0.5363 |
| NEFIRACETAM                           | 77191-36-7                 | 0.5381 |
| LAMIVUDINE                            | 134678-17-4                | 0.5411 |
| SALICYLIC ACID                        | 69-72-7                    | 0.5415 |
| BENSERAZIDE HYDROCHLORIDE             | 322-35-0                   | 0.5418 |
| FENSPIRIDE HYDROCHLORIDE              | 5053-08-7, 5053-06-5 [fens | 0.5432 |
| GUANFACINE HYDROCHLORIDE              | 29110-48-3                 | 0.5433 |
| ACEXAMIC ACID                         | 57-08-9                    | 0.5447 |
| SALICYLAMIDE                          | 65-45-2                    | 0.5448 |
| ESTRADIOL BENZOATE                    | 50-50-0                    | 0.5456 |
| EUPHOL                                | 514-47-6                   | 0.5457 |
| VERATRIC ACID                         | 93-07-2                    | 0.5459 |
| CHLORZOAZONE                          | 95-25-0                    | 0.5476 |
| SODIUM GLUCONATE                      | 527-07-1                   | 0.5488 |
| alpha-METHYL-L-TYROSINE               | 672-87-7                   | 0.5504 |
| LEVOSULPIRIDE                         | 23672-07-3                 | 0.5508 |
| RUTILANTINONE                         | 21288-61-9                 | 0.5533 |
| CARNITINE (di) HYDROCHLORIDE          | 461-06-3                   | 0.5534 |
| NORETHYNODREL                         | 68-23-5                    | 0.5534 |
| CEPHAPIRIN SODIUM                     | 24356-60-3, 21593-23-7 [ce | 0.5547 |
| GLYCYRRHIZIN                          | 1405-86-3                  | 0.5547 |
| OXYPHENONIUM BROMIDE                  | 50-10-2                    | 0.5547 |
| RAMIFENAZONE                          | 3615-24-5                  | 0.5547 |
| MALEIC ACID                           | 110-16-7                   | 0.5562 |
| MILNACIPRAN HYDROCHLORIDE             | 101152-94-7                | 0.5577 |
| SOLANESYL ACETATE                     | 56000-93-4                 | 0.5577 |
| TRIACETYLRRESVERATROL                 | 42206-94-0                 | 0.5580 |
| ROTENONIC ACID, METHYL ETHER          |                            | 0.5606 |
| CHLOROTHIAZIDE                        | 58-94-6                    | 0.5609 |

|                                       |                             |        |
|---------------------------------------|-----------------------------|--------|
| EZETIMIBE                             | 163222-33-1                 | 0.5638 |
| MARBOFLOXACIN                         | 115550-35-1                 | 0.5643 |
| TEPRENONE                             | 6809-52-5                   | 0.5645 |
| PIRFENIDONE                           | 53179-13-8                  | 0.5652 |
| CANRENONE                             | 976-71-6                    | 0.5657 |
| NIFENAZONE                            | 2139-47-1                   | 0.5658 |
| BICUCULLINE(-) METHIODIDE             | 55950-07-7                  | 0.5671 |
| ESCULIN MONOHYDRATE                   | 531-75-9                    | 0.5674 |
| CEFTAZIDIME                           | 72558-82-8                  | 0.5693 |
| EBSELEN                               | 60940-34-3                  | 0.5697 |
| STREPTOZOSIN                          | 18883-66-4                  | 0.5699 |
| THALIDOMIDE                           | 50-35-1                     | 0.5711 |
| METHIONINE (L)                        | 63-68-3                     | 0.5733 |
| TRICHLORMETHIAZIDE                    | 133-67-5                    | 0.5736 |
| TYROSINE HYDROCHLORIDE                | 60-18-4                     | 0.5754 |
| ISOTRETINON                           | 4759-48-2                   | 0.5757 |
| CEFCAPENE PIVOXIL HYDROCHLORIDE       | 147816-23-7                 | 0.5774 |
| CLOMIPHENE CITRATE                    | 50-41-9, 911-45-5 [clomiph  | 0.5775 |
| SUCRALFATE [5mM]                      | 54182-58-0 (free acid)      | 0.5794 |
| COLESEVALAM HYDROCHLORIDE (high mol v | 182815-44-7                 | 0.5809 |
| ISOPROPAMIDE IODIDE                   | 71-81-8, 7492-32-2 [isoprop | 0.5820 |
| GUAIFENESIN                           | 93-14-1                     | 0.5830 |
| BUTOCONAZOLE                          | 64872-77-1, 64872-76-0 [bu  | 0.5832 |
| 4-HYDROXY-6-METHYLPYRAN-2-ONE         | 675-10-5                    | 0.5844 |
| ETHACRIDINE LACTATE                   | 1837-57-6; 6402-23-9 (hydr  | 0.5845 |
| OCTINOXATE                            | 5466-77-3                   | 0.5860 |
| CHLORAMPHENICOL                       | 56-75-7                     | 0.5863 |
| MOXISYLYTE HYDROCHLORIDE              | 54-32-0                     | 0.5895 |
| PEMIROLAST POTASSIUM                  | 100299-08-9                 | 0.5906 |
| METHOPRENE (S)                        | 40596-69-8                  | 0.5915 |
| DICLOFENAC SODIUM                     | 15307-79-6                  | 0.5920 |
| TRICLABENDAZOLE                       | 68786-66-3                  | 0.5955 |
| KOPARIN 2,3-DIMETHYL ETHER            |                             | 0.5972 |
| CARBAMAZEPINE                         | 298-46-4                    | 0.5981 |
| OSAJIN                                | 482-53-1                    | 0.5989 |
| FLOXURIDINE                           | 50-91-9                     | 0.5995 |
| ETODOLAC                              | 41340-25-4                  | 0.5998 |
| KAWAIN                                | 3155-48-4                   | 0.6026 |
| PEUCENIN                              | 578-72-3                    | 0.6032 |
| TIOPRONIN                             | 19392                       | 0.6035 |
| CAPTOPRIL                             | 62571-86-2                  | 0.6060 |
| FISSINOLIDE                           | 1915-69-1                   | 0.6060 |
| SUCCIMER                              | 304-55-2                    | 0.6067 |
| URAPIDIL HYDROCHLORIDE                | 34661-75-1                  | 0.6068 |
| QUININE HDROCHLORIDE                  | 6119-47-7                   | 0.6084 |
| CYACETACIDE                           | 140-87-4                    | 0.6096 |
| DIBUTYL SUBERATE                      | 16090-77-0                  | 0.6148 |
| OXFENDAZOLE                           | 53716-50-0                  | 0.6161 |
| BEKANAMYCIN SULFATE                   | 4696-76-8 (base)            | 0.6180 |
| RANOLAZINE DIHYDROCHLORIDE            | 95635-55-5                  | 0.6180 |
| TRYPTOPHAN (L)                        | 73-22-3                     | 0.6195 |
| EPLERENONE                            | 107724-20-9                 | 0.6204 |
| PENCICLOVIR                           | 39809-25-1                  | 0.6218 |
| ALENDRONATE SODIUM TRIHYDRATE         | 121268-17-5                 | 0.6225 |
| TENOFOVIR                             | 206184-49-8 (acid)          | 0.6232 |
| TRIMETOZINE                           | 635-41-6                    | 0.6232 |
| BETAINE HYDROCHLORIDE                 | 590-46-5                    | 0.6233 |
| ADENOSINE TRIPHOSPHATE DISODIUM       | 34369-07-8                  | 0.6236 |
| NAFTOPIDIL                            | 57149-07-2                  | 0.6238 |
| METAXALONE                            | 1665-48-1                   | 0.6244 |
| GENTISIC ACID                         | 490-79-9                    | 0.6245 |
| RAFOXANIDE                            | 22662-39-1                  | 0.6250 |
| IMIDACLOPRID                          | 13826-41-3                  | 0.6251 |
| CEFTIOFUR HYDROCHLORIDE               | 80370-57-6                  | 0.6265 |
| ASTRAGALOSIDE IV                      | 84687-43-4                  | 0.6274 |
| MINOCYCLINE HYDROCHLORIDE             | 13614-98-7, 10118-90-8 [m   | 0.6291 |
| 4-TRIFLUOROMETHYLPHENYLACETIC ACID    | 32857-62-8                  | 0.6293 |
| ARIPRAZOLE                            | 129722-12-9                 | 0.6310 |
| CIMETIDINE                            | 51481-61-9                  | 0.6322 |
| ESTRADIOL CYPIONATE                   | 313-06-4                    | 0.6365 |
| DAPAGLIFLOZIN                         | 461432-26-8                 | 0.6366 |
| BETAMETHASONE SODIUM PHOSPHATE        | 151-73-5                    | 0.6373 |
| ALBENDAZOLE                           | 54965-21-8                  | 0.6375 |
| ROCELLIC ACID                         | 22139-54-4                  | 0.6377 |
| HARMANE                               | 486-84-0                    | 0.6396 |
| RIBOFLAVIN                            | 83-88-5                     | 0.6413 |
| BIOCHANIN A DIACETATE                 | 54443-59-3                  | 0.6418 |
| FAMCICLOVIR                           | 104227-87-4                 | 0.6431 |
| PENTYLENETETRAZOL                     | 54-95-5                     | 0.6441 |

|                                 |                             |        |
|---------------------------------|-----------------------------|--------|
| 8-CYCLOPENTYLTHEOPHYLLINE       | 35873-49-5                  | 0.6443 |
| METHYLTHIOURACIL                | 56-04-2                     | 0.6443 |
| FENACLON                        | 306-20-7                    | 0.6457 |
| ETHYL EVERNINATE                | 6110-36-7                   | 0.6482 |
| QUINIC ACID                     | 77-95-2                     | 0.6488 |
| ISONIAZID                       | 54-85-3                     | 0.6500 |
| PEONOL METHYL ETHER             | 829-20-9                    | 0.6505 |
| JOSAMYCIN                       | 56689-45-3                  | 0.6519 |
| SILDENAFIL CITRATE              | 139755-83-2                 | 0.6531 |
| OXAPROZIN                       | 21256-18-8                  | 0.6539 |
| CARBARSONE                      | 121-59-5                    | 0.6551 |
| ETHION                          | 563-12-2                    | 0.6552 |
| SACCHARIN                       | 81-07-2                     | 0.6568 |
| NEOSTIGMINE BROMIDE             | 114-80-7                    | 0.6589 |
| AMPIROXICAM                     | 99464-64-9                  | 0.6607 |
| GRISEOFULVIN                    | 126-07-8                    | 0.6613 |
| SITOSTERYL ACETATE              | 915-05-9                    | 0.6651 |
|                                 |                             | 0.6663 |
| SARAFLOXACIN HYDROCHLORIDE      | 91296-87-6                  | 0.6710 |
| DICYCLOMINE HYDROCHLORIDE       | 67-92-5, 77-19-0 [dicyclomi | 0.6717 |
| DICLOXACILLIN SODIUM            | 13412-64-1, 343-55-5 [anhy  | 0.6745 |
| SODIUM THIOGLYCOLATE            | 367-51-1                    | 0.6747 |
| CYCLOVERATRYLENE                |                             | 0.6749 |
| THIODIGLYCOL                    | 111-48-8                    | 0.6759 |
| YOHIMBINE HYDROCHLORIDE         | 65-19-0                     | 0.6778 |
| DELAPRIL HYDROCHLORIDE          | 83435-67-0                  | 0.6809 |
| SULFADIMETHOXINE                | 122-11-2                    | 0.6811 |
| RESVERATROL                     | 501-36-0                    | 0.6827 |
| ARTESUNATE                      | 182824-33-5                 | 0.6835 |
| 7,8-DIMETHOXYFLAVONE            |                             | 0.6877 |
| NITROMIDE                       | 121-81-3                    | 0.6890 |
| RITONAVIR                       | 155213-67-5                 | 0.6890 |
| LINAGLIPTIN                     | 668270-12-0                 | 0.6926 |
| MINOXIDIL                       | 38304-91-5 (base)           | 0.6933 |
| FUMARPROTOCETRARIC ACID         | 489-50-9                    | 0.6976 |
| N-METHYL (-)JEPHEDRINE [1R,2S]  | 552-79-4                    | 0.6981 |
| 5alpha-ANDROSTAN-3,17-DIONE     | 846-46-8                    | 0.6986 |
| ABIETIC ACID                    | 514-10-3                    | 0.6989 |
| PIPENZOLATE BROMIDE             | 125-51-9, 13473-38-6 [pipe  | 0.7014 |
| CANAVANINE                      | 543-38-4                    | 0.7015 |
| CEFTRIAZONE SODIUM TRIHYDRATE   | 104376-79-6, 73384-59-5 [c  | 0.7025 |
| TEGASEROD MALEATE               | 189188-57-6                 | 0.7031 |
| ADAPALENE                       | 106685-40-9                 | 0.7044 |
| ROXITHROMYCIN                   | 80214-83-1                  | 0.7060 |
| ERGOSTEROL ACETATE              | 2418-45-3                   | 0.7074 |
| METHYLXANTHOXYLIN               | 23121-32-6                  | 0.7089 |
| CARAZOLOL                       | 57775-29-8                  | 0.7095 |
| NORFLOXACIN                     | 70458-96-7                  | 0.7104 |
| DYPHYLLINE                      | 479-18-5                    | 0.7108 |
| PECTOLINARIN                    | 28978-02-1                  | 0.7108 |
| TEMOZOLOMIDE                    | 85622-93-1                  | 0.7139 |
| PIDOLIC ACID                    | 98-79-3                     | 0.7164 |
| ALLOXAN                         | 125952                      | 0.7170 |
| MOXALACTAM DISODIUM             | 64953-12-4                  | 0.7200 |
| ETHYLENEDIAMINE TETRACETIC ACID | 60-00-4                     | 0.7207 |
| PROGLUMIDE SODIUM               | 6620-60-6                   | 0.7207 |
| FOMEPIZOLE                      | 7554-65-6                   | 0.7221 |
| SPARFLOXACIN                    | 110871-86-8                 | 0.7237 |
| BETAHISTINE DIHYDROCHLORIDE     | 5579-84-0, 5638-76-6 [beta  | 0.7241 |
| METICRANE                       | 1084-65-7                   | 0.7250 |
| METHYL CAFFEATE                 | 3843-74-1                   | 0.7271 |
| NICARDIPINE HYDROCHLORIDE       | 54527-84-3, 55985-32-5 [ni  | 0.7289 |
| GRAMINE                         | 87-52-5                     | 0.7375 |
| METACRESOL                      | 108-39-4                    | 0.7394 |
| ESTRADIOL VALERATE              | 979-32-8                    | 0.7401 |
| MALATHION                       | 121-75-5                    | 0.7415 |
| DIMETHYL GAMBOGINATE            |                             | 0.7420 |
| MIRTAZAPINE                     | 61337-67-5                  | 0.7422 |
| HEXYLENE GLYCOL                 | 107-41-5                    | 0.7437 |
| QUASSIN                         | 76-78-8                     | 0.7461 |
| DOCONEXENT                      | 6217-54-5                   | 0.7464 |
| beta-AMYRIN                     | 559-70-6                    | 0.7501 |
| JUAREZIC ACID                   | 1552-94-9                   | 0.7501 |
| PSEUDOEPHEDRINE HYDROCHLORIDE   | 345-78-8                    | 0.7501 |
| GUAIACOL                        | 90-05-1                     | 0.7519 |
| ARTHONOIC ACID                  | 25556-24-5                  | 0.7521 |
| BENZONATATE                     | 104-31-4                    | 0.7528 |
| LOMERIZINE HYDROCHLORIDE        | 101477-55-8                 | 0.7543 |
| VALGANCICLOVIR HYDROCHLORIDE    | 175865-59-5                 | 0.7548 |

|                                    |                             |        |
|------------------------------------|-----------------------------|--------|
| D-ARABITOL                         | 488-82-4                    | 0.7555 |
| CAMPHOR                            | 464-49-3; 76-22-2           | 0.7568 |
| CINCHONINE                         | 118-10-5                    | 0.7576 |
| BENZYL ALCOHOL                     | 100-51-6                    | 0.7580 |
| LUMEFANTRINE                       | 82186-77-4                  | 0.7619 |
| ISOBUTYLMETHYLXANTHINE             |                             | 0.7626 |
| LYSINE (L) HYDROCHLORIDE           | 657-27-2                    | 0.7656 |
| URSOCHOLANIC ACID                  | 546-18-9                    | 0.7688 |
| SUCCINYL-SULFATHIAZOLE             | 116-43-8                    | 0.7695 |
| RUTIN                              | 153-18-4                    | 0.7701 |
| BETAMETHASONE VALERATE             | 2152-44-5                   | 0.7721 |
| OXINIC ACID                        | 2398-81-4                   | 0.7731 |
| PROTRYPTILINE HYDROCHLORIDE        | 1225-55-4                   | 0.7736 |
| TRIMETAZIDINE DIHYDROCHLORIDE      | 5011-34-7                   | 0.7755 |
| RISEDRONATE SODIUM                 | 115436-72-1                 | 0.7756 |
| LAPACHOL                           | 84-79-7                     | 0.7785 |
| CARBACHOL                          | 51-83-2                     | 0.7790 |
| SAXAGLIPTIN                        | 945667-22-1                 | 0.7803 |
| RIBOSTAMYCIN SULFATE               | 25546-65-0                  | 0.7804 |
| THONZYLAMINE HYDROCHLORIDE         | 63-56-9, 91-85-0 [thonzylan | 0.7818 |
| GUANIDINE HYDROCHLORIDE            | 50-01-1                     | 0.7841 |
| KETANSERIN                         | 83846-83-7, 74050-98-9(ba   | 0.7900 |
| BUTYLATED HYDROXYTOLUENE           | 128-37-0                    | 0.7935 |
| INDINAVIR SULFATE                  | 0157810-81-6                | 0.7935 |
| DESOXYCORTICOSTERONE ACETATE       | 56-47-3                     | 0.7966 |
| d-LIMONENE                         | 138-86-7                    | 0.7985 |
| RUFLOXACIN HYDROCHLORIDE           | 106017-08-7, 101363-10-4    | 0.7994 |
| ACARBOSE                           | 56180-94-0                  | 0.7995 |
| VORICONAZOLE                       | 137234-62-9                 | 0.8053 |
| SULFACARBAMIDE                     | 547-44-4                    | 0.8061 |
| 2,5-DI-t-BUTYL-4-HYDROXYANISOLE    | 1991-52-2                   | 0.8063 |
| 4-FLUOROPHENYLACETIC ACID          | 156-06-9                    | 0.8078 |
| AMISULPRIDE                        | 71675-85-9                  | 0.8102 |
| CADAVERINE TARTRATE                | 462-94-2(base)              | 0.8105 |
| MOROXYDINE HYDROCHLORIDE           | 3731-59-7                   | 0.8105 |
| CYSTEAMINE HYDROCHLORIDE           | 60-23-1                     | 0.8120 |
| NALIDIXIC ACID                     | 389-08-2, 3374-05-8 [anhyd  | 0.8120 |
| TROMETHAMINE                       | 77-86-1                     | 0.8129 |
| EUCALYPTOL                         | 470-82-6                    | 0.8141 |
| S-CARBAMOYL-L-CYSTEINE             | 2072-71-1                   | 0.8152 |
| AVOBENZONE                         | 70356-09-1                  | 0.8164 |
| QUETIAPINE FUMARATE                | 111974-69-7                 | 0.8246 |
| SULFAQUINOXALINE SODIUM            | 59-40-5                     | 0.8284 |
| SULFISOMIDINE                      | 515-64-0                    | 0.8291 |
| BISOPROLOL FUMARATE                | 104344-23-2                 | 0.8376 |
| FUROSEMIDE                         | 54-31-9                     | 0.8396 |
| NAFTIFINE HYDROCHLORIDE            | 65473-14-5                  | 0.8428 |
| LACITOL                            | 585-86-4, 81025-04-9        | 0.8443 |
| IPRIFLAVONE                        | 35212-22-7                  | 0.8446 |
| DEOXYPEGANINE HYDROCHLORIDE        | 61939-05-7                  | 0.8490 |
| BENZTHIAZIDE                       | 91-33-8                     | 0.8493 |
| 2-METHOXYRESORCINOL                | 29267-67-2                  | 0.8521 |
| GLIQUIDONE                         | 33342-05-1                  | 0.8630 |
| TRICAINES MESYLATE                 | 886-86-2                    | 0.8651 |
| NORGESTIMATE                       | 35189-28-7                  | 0.8682 |
| FLUOCINOLONE ACETONIDE             | 67-73-2                     | 0.8689 |
| QUINOLINIC ACID                    | 89-00-9                     | 0.8690 |
| BROMOPRIDE                         | 4093-35-0                   | 0.8736 |
| NAFCILLIN SODIUM                   | 7177-50-6, 985-16-0 [anhyd  | 0.8767 |
| SPERMIDINE TRIHYDROCHLORIDE        | 334-50-9                    | 0.8776 |
| ACETOHYDROXAMIC ACID               | 546-88-3                    | 0.8780 |
| GLYCERIN                           | 56-81-5                     | 0.8789 |
| ETHYL VANILLIN                     | 121-32-4                    | 0.8890 |
| DAUNORUBICIN HYDROCHLORIDE         | 20830-81-3                  | 0.8898 |
| VIOMYCIN SULFATE                   | 37883-00-4                  | 0.8908 |
| TRAZODONE HYDROCHLORIDE            | 25332-39-2, 19794-93-5 [tra | 0.8916 |
| WILFORLIDE A                       | 84104-71-2                  | 0.8947 |
| BETA-AMINOALANINE HYDROCHLORIDE    | 54897-59-5                  | 0.8960 |
| 11(12)-EPOXY-URSOLOLACTONE ACETATE |                             | 0.8971 |
| NILUTAMIDE                         | 63612-50-0                  | 0.8983 |
| MOLINDONE HYDROCHLORIDE            | 15622-65-8                  | 0.9005 |
| TRIMEBUTINE MALEATE                | 34140-59-5(base)            | 0.9017 |
| MIGLITOL                           | 72432-03-2                  | 0.9025 |
| DETOMIDINE HYDROCHLORIDE           | 90038-01-1                  | 0.9049 |
| CHLORAMPHENICOL SODIUM SUCCINATE   | 982-57-0, 56-75-7 [chloram  | 0.9051 |
| NIALAMIDE                          | 51-12-7                     | 0.9059 |
| URSOLIC ACID                       | 77-52-1                     | 0.9062 |
| ASTEMIZOLE                         | 68844-77-9                  | 0.9109 |
| SULFADIAZINE                       | 68-35-9                     | 0.9119 |

|                                                    |                                        |        |
|----------------------------------------------------|----------------------------------------|--------|
| BENDROFLUMETHIAZIDE                                | 73-48-3                                | 0.9129 |
| DIOSGENIN                                          | 512-04-9                               | 0.9142 |
| BECLOMETHASONE DIPROPIONATE                        | 5534-09-8, 4419-39-0 [beclomethasone]  | 0.9142 |
| COLISTIMETHATE SODIUM                              | 8068-28-8, 21362-08-3 [colistimethate] | 0.9145 |
| QUIPAZINE MALEATE                                  | 5786-68-5, 4774-24-7 [quipazine]       | 0.9172 |
| LENALIDOMIDE                                       | 191732-72-6                            | 0.9183 |
| DROPROPIZINE                                       | 17692-31-8                             | 0.9185 |
| SUPLATAST TOSYLATE                                 | 94055-76-2                             | 0.9191 |
| ACETYL-DIHYDRO-7-EPIKHIVORIN                       |                                        | 0.9197 |
| AZATHIOPRINE                                       | 446-86-6                               | 0.9221 |
| NITHIAMIDE                                         | 140-40-9                               | 0.9231 |
| HMECHROME                                          | 90-33-5                                | 0.9245 |
| ALLYLESTRENOL                                      | 432-60-0                               | 0.9252 |
| THREONINE (L)                                      | 72-19-5                                | 0.9260 |
| DEHYDROVARIABILIN                                  |                                        | 0.9263 |
| PRAZOSIN HYDROCHLORIDE                             | 19237-84-4, 19216-56-9 [prazosin]      | 0.9290 |
| PRALIDOXIME MESYLATE                               | 154-97-2                               | 0.9300 |
| DIATRIZOIC ACID                                    | 117-96-4                               | 0.9308 |
| INOSINE                                            | 58-63-9                                | 0.9309 |
| HALAZONE                                           | 80-13-7                                | 0.9318 |
| NEVIRAPINE                                         | 129618-40-2                            | 0.9336 |
| NETILMICIN SULFATE                                 | 56391-56-1                             | 0.9351 |
| BIFONAZOLE                                         | 60628-96-8                             | 0.9391 |
| VENLAFAXINE HYDROCHLORIDE                          | 99300-78-4, 93413-69-5 [venlafaxine]   | 0.9405 |
| HETACILLIN POTASSIUM                               | 5321-32-4, 3511-16-8 [hetacillin]      | 0.9413 |
| BENDAMUSTINE HYDROCHLORIDE                         | 3543-75-7                              | 0.9439 |
| DIACETAMATE                                        | 2623-33-8                              | 0.9469 |
| MIDODRINE HYDROCHLORIDE                            | 3092-17-9, 42794-76-3 [midodrine]      | 0.9477 |
| MELOXICAM                                          | 71125-38-7                             | 0.9500 |
| HOMATROPINE HYDROBROMIDE                           | 51-56-9, 87-00-3 [homatropine]         | 0.9506 |
| METACETAMOL                                        | 621-42-1                               | 0.9522 |
| PHYSOSTIGMINE                                      | 57-47-6                                | 0.9524 |
| BISABOLOL                                          | 515-69-5                               | 0.9534 |
| FENOLDOPAM MESYLATE                                | 67227-57-0                             | 0.9539 |
| HEPTAMINOL HYDROCHLORIDE                           | 543-15-7, 372-66-7 [heptaminol]        | 0.9552 |
| DIHYDROGEDUNIN                                     |                                        | 0.9574 |
| AZAPERONE                                          | 1649-18-9                              | 0.9591 |
| TOLTRAZURIL                                        | 69004-03-1                             | 0.9591 |
| TIOCONAZOLE                                        | 65899-73-2                             | 0.9619 |
| ETHAMBUTOL HYDROCHLORIDE                           | 1070-11-7, 74-55-5 [ethambutol]        | 0.9641 |
| MELENGESTROL ACETATE                               | 2919-66-6                              | 0.9660 |
| PICROTIN                                           | 21416-53-5                             | 0.9667 |
| GUANETHIDINE MONOSULFATE                           | 55-65-2                                | 0.9675 |
| CLONIDINE HYDROCHLORIDE                            | 4205-91-8, 4205-90-7 [clonidine]       | 0.9695 |
| TILETAMINE HYDROCHLORIDE                           | 14176-50-2                             | 0.9703 |
| NANOFIN                                            | 504-03-0                               | 0.9704 |
| MILRINONE                                          | 78415-72-2                             | 0.9716 |
| 3alpha-HYDROXY-3-DEOXYANGOLENSIC ACID METHYL ESTER |                                        | 0.9757 |
| TAPENTADOL HYDROCHLORIDE                           | 175591-23-8                            | 0.9792 |
| PREGNENOLONE                                       | 145-13-1, 4598-67-8 [pregnenolone]     | 0.9817 |
| ACETARSOL                                          | 97-44-9                                | 0.9841 |
| ROPINIROLE HYDROCHLORIDE                           | 91374-21-9                             | 0.9861 |
| METHOXYVONE                                        | 82517-12-2                             | 0.9877 |
| ABIRATERONE                                        | 154229-18-2                            | 0.9882 |
| SULFAMETER                                         | 651-06-9                               | 0.9888 |
| BETULINIC ACID                                     | 472-15-1                               | 0.9936 |
| DIRITHROMYCIN                                      | 62013-04-1                             | 0.9958 |
| AMMONIUM LACTATE                                   | 52003-58-4                             | 0.9962 |
| MUSCAMONE                                          | 27519-02-4                             | 0.9963 |
| DEXPANTHENOL                                       | 81-13-0                                | 1.0012 |
| DIMETHYL FUMARATE                                  | 624-49-7                               | 1.0018 |
| BEMOTRIZINOL                                       | 187393-00-6                            | 1.0023 |
| FLECAINIDE ACETATE                                 | 54143-56-5                             | 1.0062 |
| ATROPINE SULFATE                                   | 51-55-8, 5908-99-6 [atropine]          | 1.0090 |
| PRAZIQUANTEL                                       | 55268-74-1                             | 1.0112 |
| BROMHEXINE HYDROCHLORIDE                           | 611-75-6, 3572-43-8 [bromhexine]       | 1.0118 |
| IBANDRONATE SODIUM                                 | 138926-19-9                            | 1.0151 |
| ACAMPROSATE CALCIUM                                | 77337-73-6                             | 1.0197 |
| ERGOCALCIFEROL                                     | 50-14-6                                | 1.0198 |
| CEFOTAXIME SODIUM                                  | 64485-93-4, 63527-52-6 [cefotaxime]    | 1.0253 |
| ADIPIC ACID                                        | 124-04-9                               | 1.0316 |
| MEPIROXOL                                          | 6968-72-5                              | 1.0317 |
| ATOVAQUONE                                         | 95233-18-4                             | 1.0337 |
| NAPROXEN                                           | 22204-53-1                             | 1.0349 |
| SULFAMOXAOLE                                       | 729-99-7                               | 1.0370 |
| CRESOL                                             | 1319-77-3                              | 1.0381 |
| NEFAZODONE HYDROCHLORIDE                           | 82752-99-6                             | 1.0394 |
| CINACALCET HYDROCHLORIDE                           | 364782-34-3                            | 1.0395 |
| RAMIPRIL                                           | 87333-19-5                             | 1.0397 |

|                                                  |                             |        |
|--------------------------------------------------|-----------------------------|--------|
| TRICHLORFON                                      | 52-68-6                     | 1.0401 |
| ROSIGLITAZONE MALEATE                            | 122320-73-4                 | 1.0423 |
| NEROL                                            | 106-25-2                    | 1.0454 |
| ACIPIMOX                                         | 51037-30-0                  | 1.0457 |
| BUCLADESINE SODIUM                               | 16980-89-5, 362-74-3(acid)  | 1.0466 |
| ELETRIPTAN HYDROBROMIDE                          | 177834-92-3, 143322-58-1(   | 1.0482 |
| ACETAMINOSALOL                                   | 118-57-0                    | 1.0516 |
| APRAMYCIN SULFATE                                | 65710-07-8                  | 1.0546 |
| GUANIDINE CARBONATE                              | 593-85-1                    | 1.0614 |
| ENTACAPONE                                       | 116314-67-1                 | 1.0652 |
| ALTRENOGEST                                      | 850-52-2                    | 1.0670 |
| ERYTHROSINE SODIUM                               | 16423-68-0                  | 1.0673 |
| GANCICLOVIR HYDRATE                              | 82410-32-0                  | 1.0680 |
| ENALAPRILAT                                      | 84680-54-6                  | 1.0691 |
| ALLYLTHIOUREA                                    | 109-57-9                    | 1.0718 |
| 1,2-EPOXY-3,18-DIDEOXY-3beta,18-DIACETOXYGEDUNIN |                             | 1.0740 |
| DRONEDARONE HYDROCHLORIDE                        | 141625-93-6                 | 1.0747 |
| 2,3-DIHYDROXY-4-METHOXY-4'-ETHOXYBENZOPHENONE    |                             | 1.0816 |
| HISTAMINE DIHYDROCHLORIDE                        | 51-45-6 [histamine]         | 1.0854 |
| TRIOXSALEN                                       | 3902-71-4                   | 1.0858 |
| TELMISARTAN                                      | 144701-48-4                 | 1.0863 |
| TESTOSTERONE                                     | 58-22-0                     | 1.0947 |
| EPRODISATE DISODIUM                              | 36589-58-9                  | 1.0965 |
| SIROLIMUS                                        | 53123-88-9                  | 1.0977 |
| GLUCONOLACTONE                                   | 90-80-2                     | 1.0991 |
| PIPERONYL BUTOXIDE                               | 51-03-6                     | 1.1006 |
| OCTISALATE                                       | 118-60-5                    | 1.1017 |
| DESVENLAFAXINE SUCCINATE                         | 93413-62-8                  | 1.1107 |
| EMEDASTINE DIFUMARATE                            | 87233-62-3                  | 1.1107 |
| DESONIDE                                         | 638-94-8                    | 1.1114 |
| TRIENTINE HYDROCHLORIDE                          | 38260-01-4                  | 1.1119 |
| BISSALICYL FUMARATE                              |                             | 1.1119 |
| LAMOTRIGINE                                      | 84057-84-1                  | 1.1122 |
| SODIUM NITROPRUSSIDE DIHYDRATE                   | 13755-38-9                  | 1.1172 |
| ACETAZOLAMIDE                                    | 59-66-5                     | 1.1250 |
| PRAXADINE HYDROCHLORIDE                          | 4023-02-3, 4023-00-1 (base  | 1.1321 |
| DOXYCYCLINE HYDROCHLORIDE                        | 17086-28-1, 564-25-0 [anhy  | 1.1328 |
| DIBUTYL PHTHALATE                                | 84-74-2                     | 1.1330 |
| INDOPROFEN                                       | 31842-01-0                  | 1.1334 |
| ALTRETAMINE                                      | 645-05-6                    | 1.1377 |
| SAFROLE                                          | 94-59-7                     | 1.1423 |
| PIRENPERONE                                      | 75444-65-4                  | 1.1447 |
| OLSALAZINE SODIUM                                | 6054-98-4                   | 1.1456 |
| ZALCITABINE                                      | 7481-89-2                   | 1.1468 |
| BENZBROMARONE                                    | 3562-84-3                   | 1.1512 |
| TICLOPIDINE HYDROCHLORIDE                        | 53885-35-1                  | 1.1515 |
| CROTAMITON                                       | 483-63-6                    | 1.1535 |
| ENTANDROPHRAGMIN                                 | 11013-05-1                  | 1.1566 |
| COLCHICINE                                       | 64-86-8                     | 1.1625 |
| PERINDOPRILAT                                    | 95153-31-4                  | 1.1661 |
| LYNESTRENOL                                      | 52-76-6                     | 1.1662 |
| CYSTINE                                          | 56-89-3                     | 1.1666 |
| CASANTHRANOL [cascaroside A shown]               | 8024-48-4                   | 1.1669 |
| ISOGUVACINE HYDROCHLORIDE                        | 68547-87-7                  | 1.1717 |
| TETRABENAZINE                                    | 58-46-8                     | 1.1747 |
| APHYLIC ACID                                     | 642-67-1                    | 1.1832 |
| GALANGIN 3-O-METHYL ETHER                        | 6665-74-3                   | 1.1890 |
| NICORANDIL                                       | 65141-46-0                  | 1.1950 |
| IFOSFAMIDE                                       | 3778-73-2                   | 1.1954 |
| FURALTADONE                                      | 139-91-3                    | 1.2067 |
| PHENYLETHYL ALCOHOL                              | 60-12-8                     | 1.2079 |
| DEFEROXAMINE MESYLATE                            | 138-14-7, 70-51-9 [deferoxa | 1.2085 |
| PUTRESCINE DIHYDROCHLORIDE                       | 333-93-7                    | 1.2176 |
| ANTIMYCIN A (A1 shown)                           | 1397-94-0                   | 1.2207 |
| PEMETREXED                                       | 137281-23-3                 | 1.2213 |
| GESTODENE                                        | 60282-87-3                  | 1.2229 |
| USNIC ACID                                       | 125-46-2                    | 1.2275 |
| MENBUTONE                                        | 3562-99-0                   | 1.2276 |
| 5alpha-CHOLESTANOL                               | 80-97-7                     | 1.2278 |
| EBASTINE                                         | 90729-43-4                  | 1.2296 |
| GEMFIBROZIL                                      | 25812-30-0                  | 1.2403 |
| GABOXADOL HYDROCHLORIDE                          | 64603-91-4                  | 1.2421 |
| MEQUINOL                                         | 150-76-5                    | 1.2435 |
| DEXAMETHASONE ACETATE                            | 55812-90-3, 1177-87-3 [anf  | 1.2472 |
| PYRETHRINS                                       | 121-21-1                    | 1.2537 |
| 16beta-METHYL-16(17)-EPOXY-5-PREGNENOLONE        |                             | 1.2580 |
| TOLAZAMIDE                                       | 1156-19-0                   | 1.2635 |
| CEFPYRAMIDE                                      | 70797-11-4                  | 1.2700 |
| RIFAMPIN                                         | 13292-46-1                  | 1.2719 |



|                               |                             |        |
|-------------------------------|-----------------------------|--------|
| DIPTERYXIN                    | 53948-01-9                  | 1.2812 |
| 4-ACETOXYPHENOL               | 3233-32-7                   | 1.2839 |
| BRUCINE                       | 4845-99-2, 357-57-3 [brucir | 1.2857 |
| NIACINAMIDE                   | 98-92-0                     | 1.2863 |
| CARSALAM                      | 2037-95-8                   | 1.2933 |
| CORTISONE                     | 53-06-5                     | 1.2953 |
| MICONAZOLE NITRATE            | 22832-87-7, 22916-47-8 [m   | 1.2973 |
| LOBELINE HYDROCHLORIDE        | 90-69-7                     | 1.2994 |
| CYCLAMIC ACID                 | 100-88-9                    | 1.3018 |
| EDITOL                        | 102-60-3                    | 1.3057 |
| CYCLOSERINE (L)               | 339-72-0                    | 1.3085 |
| CHLOROGUANIDE HYDROCHLORIDE   | 637-32-1                    | 1.3090 |
| CARPROFEN                     | 53716-49-7                  | 1.3234 |
| CILNIDIPINE                   | 132203-70-4                 | 1.3263 |
| VALSARTAN                     | 137862-53-4                 | 1.3330 |
| SULFADOXINE                   | 2447-57-6                   | 1.3331 |
| FUSIDIC ACID                  | 1859240                     | 1.3362 |
| FIUMAZENIL                    | 78755-81-4                  | 1.3416 |
| ACETOHEXAMIDE                 | 968-81-0                    | 1.3426 |
| CLOBETASOL PROPIONATE         | 25122-46-7, 25122-41-2 [ck  | 1.3434 |
| ETHYL PARABEN                 | 120-47-8                    | 1.3458 |
| CHLORPROPAMIDE                | 94-20-2                     | 1.3515 |
| ERDOSTEINE                    | 84611-23-4                  | 1.3562 |
| NITROFURANTOIN                | 67-20-9                     | 1.3646 |
| PICROPODOPHYLLIN              | 477-47-4                    | 1.3657 |
| PHENYLPIRUVIC ACID            | 156-06-9                    | 1.3709 |
| COUMOPHOS                     | 56-72-4                     | 1.3828 |
| BISOCTRIZOLE                  | 103597-45-1                 | 1.3907 |
| PREGNENOLONE SUCCINATE        | 4598-67-8                   | 1.4012 |
| NADIDE                        | 53-84-9                     | 1.4037 |
| PEMPIDINE TARTRATE            | 546-48-5                    | 1.4041 |
| NAPHAZOLINE HYDROCHLORIDE     | 550-99-2, 835-31-4 [naphaz  | 1.4122 |
| GALLAMINE TRIETHIODIDE        | 65-29-2, 153-76-4 [gallamin | 1.4160 |
| LUPEOL                        | 545-47-1                    | 1.4244 |
| CITRIC ACID                   | 77-92-9                     | 1.4313 |
| ETOMIDATE                     | 33125-97-2                  | 1.4339 |
| DIDANOSINE                    | 69655-05-6                  | 1.4390 |
| CARBENICILLIN DISODIUM        | 4800-94-6, 4697-36-3 [carb  | 1.4486 |
| ACEFYLLINE                    | 652-37-9                    | 1.4664 |
| PRALIDOXIME CHLORIDE          | 51-15-0                     | 1.4671 |
| 4-NAPHTHALIMIDOBUTYRIC ACID   | 88909-96-0                  | 1.4675 |
| ENROFLOXACIN                  | 93106-60-6                  | 1.4701 |
| KOPARIN                       | 65048-75-1                  | 1.4732 |
| BROMPERIDOL                   | 10457-90-6                  | 1.4817 |
| METYRAPONE                    | 54-36-4                     | 1.4818 |
| EXEMESTANE                    | 107868-30-4                 | 1.4944 |
| DORAMECTIN                    | 117704-25-3                 | 1.4954 |
| PANTOTHENIC ACID(d) Na salt   | 63409-48-3                  | 1.4967 |
| AMIODARONE HYDROCHLORIDE      | 1951-25-3                   | 1.4996 |
| NADOLOL                       | 42200-33-9                  | 1.5056 |
| EDROPHONIUM CHLORIDE          | 116-38-1, 312-48-1 [edroph  | 1.5099 |
| CHLORQUINALDOL                | 72-80-0                     | 1.5290 |
| TESTOSTERONE PROPIONATE       | 57-85-2                     | 1.5339 |
| ZANAMIVIR                     | 139110-80-8                 | 1.5344 |
| RIBOFLAVIN 5-PHOSPHATE SODIUM | 130-40-5                    | 1.5369 |
| ACITRETIN                     | 55079-83-9                  | 1.5407 |
| CEFPODOXIME PROXETIL          | 87239-81-4                  | 1.5508 |
| BENZYL BENZOATE               | 120-51-4                    | 1.5525 |
| CHLORAMPHENICOL PALMITATE     | 530-43-8                    | 1.5570 |
| PENTETIC ACID                 | 67-43-6                     | 1.5675 |
| CHLORAMBUCIL                  | 305-03-3                    | 1.5757 |
| ESTROPIPATE                   | 7280-37-7                   | 1.5828 |
| CLOPIDOGREL SULFATE           | 113665-84-2                 | 1.5909 |
| EQUILIN                       | 474-86-2                    | 1.5946 |
| ACTINOQUINOL SODIUM           | 1952772                     | 1.5969 |
| GATIFLOXACIN                  | 160738-57-8                 | 1.6041 |
| ACETYLCYSTEINE                | 616-91-1                    | 1.6051 |
| METHYLCLOTHIAZIDE             | 135-07-9                    | 1.6083 |
| ANCITABINE HYDROCHLORIDE      | 10212-25-6                  | 1.6092 |
| CAFFEINE                      | 58-08-2                     | 1.6130 |
| SELEGILINE HYDROCHLORIDE      | 14611-52-0                  | 1.6194 |
| BICALUTAMIDE                  | 90357-06-5                  | 1.6326 |
| VECURONIUM BROMIDE            | 50700-72-6                  | 1.6326 |
| ADEFOVIR DIPIVOXYL            | 142340-99-6                 | 1.6361 |
| HALCINONIDE                   | 3093-35-4                   | 1.6611 |
| NIACIN                        | 59-67-6                     | 1.6624 |
| THIAMYLAL SODIUM              | 337-47-3, 77-27-0 [thiamyla | 1.6811 |
| PHLORETIN                     | 60-82-2                     | 1.6826 |
| PREGABALIN                    | 148553-50-8                 | 1.6941 |

|                                    |                                     |        |
|------------------------------------|-------------------------------------|--------|
| TRIMETHADIONE                      | 127-48-0                            | 1.6946 |
| NEOSTIGMINE METHYLSULFATE          | 51-60-5                             | 1.6991 |
| PHENOXYBENZAMINE HYDROCHLORIDE     | 63-92-3, 59-96-1 [phenoxyb          | 1.7027 |
| PYRIDOSTIGMINE BROMIDE             | 101-26-8, 155-97-5 [pyridos         | 1.7208 |
| URETHANE                           | 51-79-6                             | 1.7227 |
| GENTAMICIN SULFATE                 | 1403-66-3                           | 1.7231 |
| DIETHYLTOLUAMIDE                   | 134-62-3                            | 1.7257 |
| NATAMYCIN                          | 7681-93-8                           | 1.7439 |
| ITRACONAZOLE HYDROCHLORIDE         | 84625-61-6                          | 1.7523 |
| CLOTRIMAZOLE                       | 23593-75-1                          | 1.7525 |
| DIAZOXIDE                          | 364-98-7                            | 1.7582 |
| SENNOSIDE A                        | 81-27-6                             | 1.7648 |
| MECHLORETHAMINE                    | 55-86-7, 51-75-2 [mechlore          | 1.7798 |
| NORETHINDRONE ACETATE              | 51-98-9                             | 1.7803 |
| HYCANTHONE                         | 3105-97-3                           | 1.7992 |
| GEMCITABINE HYDROCHLORIDE          | 122111-03-9                         | 1.8281 |
| BETAZOLE HYDROCHLORIDE             | 138-92-1                            | 1.8374 |
| IVERMECTIN                         | 70288-86-7                          | 1.8501 |
| MEGLUTOL                           | 503-49-1                            | 1.8507 |
| TRANEXAMIC ACID                    | 1197-18-8 (acid)                    | 1.8691 |
| BEPRIDIL HYDROCHLORIDE             | 74764-40-2                          | 1.8717 |
| DEBRISOQUIN SULFATE                | 581-88-4                            | 1.8810 |
| MELPHALAN                          | 148-82-3                            | 1.8922 |
| ISAXONINE                          | 4214-72-6                           | 1.8976 |
| OXOLINIC ACID                      | 14698-29-4 (acid)                   | 1.8990 |
| MOXIFLOXACIN HYDROCHLORIDE         | 186826-86-8                         | 1.8995 |
| ACETYLPHENYLALANINE                |                                     | 1.9141 |
| BLEOMYCIN (bleomycin B2 shown)     | 9041-93-4, 11056-06-7 [ble          | 1.9157 |
| ETHAVERINE HYDROCHLORIDE           | 985-13-7, 486-47-5 [base]           | 1.9229 |
| CYTARABINE                         | 147-94-4                            | 1.9266 |
| OLEIC ACID                         | 112-80-1                            | 1.9433 |
| METFORMIN HYDROCHLORIDE            | 1115-70-4                           | 1.9459 |
| BUTYL PARABEN                      | 94-26-8                             | 1.9463 |
| TICARCILLIN DISODIUM               | 4697-14-7                           | 1.9537 |
| DIFFRACTAIC ACID                   | 436-32-8                            | 1.9676 |
| HALOTHANE                          | 151-67-7                            | 1.9691 |
| MITOMYCIN                          | 50-07-7                             | 1.9791 |
| NISOLDIPINE                        | 63675-72-9                          | 1.9796 |
| PHENOBARBITAL                      | 50-06-6                             | 1.9835 |
| FINASTERIDE                        | 98319-26-7                          | 2.0011 |
| NEOMYCIN TRISULFATE                | 1405-10-3, 1404-04-2 [neor          | 2.0379 |
| RIVAROXABAN                        | 366789-02-8                         | 2.0403 |
| ARISTOLOCHIC ACID                  | 313-67-7                            | 2.0454 |
| CALCIUM GLUCEPTATE                 | 29039-00-7                          | 2.0527 |
| PENICILLAMINE ETHANOLAMINE SALT    | 52-67-5 (acid)                      | 2.0548 |
| ETHOPABATE                         | 59-06-3                             | 2.0788 |
| CAPOBENIC ACID                     | 21434-91-3                          | 2.0932 |
| REPAGLINIDE                        | 135062-02-1                         | 2.1228 |
| TROSPIUM CHLORIDE                  | 10405-02-4                          | 2.1321 |
| RHETSININE                         | 526-43-2                            | 2.1369 |
| PTEROSTILBENE                      | 537-42-8                            | 2.1467 |
| BEPHENIUM HYDROXYNAPHTHOATE        | 3818-50-6                           | 2.1567 |
| CLORSULON                          | 60200-06-8                          | 2.1997 |
| LANOSTEROL                         | 79-63-0                             | 2.2003 |
| GLUCOSAMINE HYDROCHLORIDE          | 3416-24-8                           | 2.2186 |
| OMEPRAZOLE                         | 73590-58-6                          | 2.2188 |
| MELATONIN                          | 73-31-4                             | 2.2535 |
| GLUTAMINE (L) HYDROCHLORIDE        | 56-85-9                             | 2.2689 |
| CARMOFUR                           | 61422-45-5                          | 2.2806 |
| GEMIFLOXACIN MESYLATE              | 204519-65-3                         | 2.2870 |
| AMIKACIN HYDRATE                   | 37517-28-5                          | 2.3226 |
| RABEPRAZOLE SODIUM                 | 117976-90-6                         | 2.3396 |
| EPIRUBICIN HYDROCHLORIDE           | 56390-09-1                          | 2.3457 |
| PROFLAVINE HEMISULFATE             | 553-30-0, 1811-28-5                 | 2.6002 |
| ECONAZOLE NITRATE                  | 68797-31-9, 27220-47-9 [ec          | 2.9186 |
| PODOFILOX                          | 518-28-5                            | 3.5794 |
| PHENSUCCIMIDE                      | 86-34-0                             | 4.2399 |
| TUBOCURARINE CHLORIDE PENTAHYDRATE | 6989-98-6, 57-94-3 [anhydrous], 413 |        |
| FLUTAMIDE                          | 13311-84-7                          |        |
| RETINYL PALMITATE                  | 79-81-2                             |        |
| CREATINE HYDRATE                   | 6020-87-7                           |        |
| FELODIPINE                         | 72509-76-3                          |        |
| RONNEL                             | 299-84-3                            |        |
| CHLOROPHYLLIDE Cu COMPLEX Na SALT  | 11006-34-1                          |        |
| CITICOLINE                         | 987-78-0                            |        |
| OMEGA-3-ACID ESTERS (EPA shown)    | 86227-47-6                          |        |
| SULCONAZOLE NITRATE                | 61318-91-0, 61318-90-9 [sulconazole |        |
| TETRAMIZOLE HYDROCHLORIDE          | 5086-74-8                           |        |
| OXYBUTYNIN CHLORIDE                | 1508-65-2                           |        |

|                                        |                                     |  |
|----------------------------------------|-------------------------------------|--|
| ADENOSINE                              | 58-61-7                             |  |
| VINCRIStINE SULFATE                    | 2068-78-2                           |  |
| TYLOXAPOL                              | 25301-02-4                          |  |
| PEFLOXACIN MESYLATE                    | 149676-40-4                         |  |
| TADALAFIL                              | 171596-29-5                         |  |
| OCTOCRYLENE                            | 6197-30-4                           |  |
| ALISKIREN HEMIFUMARATE                 | 173334-57-1                         |  |
| COLISTIN SULFATE                       | 1264-72-8                           |  |
| FLUDARABINE PHOSPHATE                  | 75607-67-9                          |  |
| ATAZANAVIR SULFATE                     | 229975-97-7                         |  |
| RIFAPENTINE                            | 61379-65-5                          |  |
| 1,4-NAPHTHOQUINONE                     | 130-15-4                            |  |
| 18-AMINOABIETA-8,11,13-TRIENE SULFATE  |                                     |  |
| ADRENALONE HYDROCHLORIDE               | 62-13-5                             |  |
| ALLYLSIStHIOCYANATE                    | 57-06-7                             |  |
| AMINACRINE                             | 90-45-9, 134-50-9 [aminacrine hydro |  |
| AMLODIPINE BESYLATE                    | 111470-99-6                         |  |
| AMOXAPINE                              | 14028-44-5                          |  |
| AMPYZINE SULFATE                       | 7082-29-3                           |  |
| AMSACRINE                              | 51264-14-3                          |  |
| ANDROGRAPHOLIDE                        | 5508-58-7                           |  |
| ANIRACETAM                             | 72432-10-1                          |  |
| ANTHOTHECOL                            | 10410-83-0                          |  |
| ANTIMONY POTASSIUM TARTRATE TRIHYDRATE | 28300-74-5                          |  |
| ARSANILIC ACID                         | 98-50-0                             |  |
| ARSENIC TRIOXIDE DIETHANOLAMINE SALT   | 1327-53-3                           |  |
| ASCORBYL PALMITATE                     | 137-66-6                            |  |
| ASPARTIC ACID (L)                      | 1825910                             |  |
| ATROPINE                               | 51-55-8                             |  |
| BENAZEPRIL HYDROCHLORIDE               | 86541-74-4                          |  |
| BENZAZAC                               | 20187-55-7                          |  |
| BENOXINATE HYDROCHLORIDE               | 5987-82-6                           |  |
| BENURESTAT                             | 38274-54-3                          |  |
| BENZALKONIUM CHLORIDE HYDRATE          | 8001-54-5                           |  |
| BENZOXIQUINE                           | 86-75-9                             |  |
| BENZOYLPAS                             | 13898-58-3                          |  |
| BETAMETHASONE ACETATE                  | 987-24-6                            |  |
| BISMUTH SUBSALICYLATE                  | 14882-18-9                          |  |
| BROMINDIONE                            | 1146-98-1                           |  |
| BRONOPOL                               | 52-51-7                             |  |
| BURAMATE                               | 4663-83-6                           |  |
| BUSPIRONE HYDROCHLORIDE                | 33386-08-2                          |  |
| CABAZITAXEL                            | 183133-96-2                         |  |
| CANTHARIDIN                            | 56-25-7                             |  |
| CAPECITABINE                           | 154361-50-9                         |  |
| CAPSAZEPINE                            | 138977-28-3                         |  |
| CAPTAMINE                              | 108-02-1                            |  |
| CARBIMAZOLE                            | 22232-54-8                          |  |
| CARTEOLOL HYDROCHLORIDE                | 51781-21-6                          |  |
| CEFONICID SODIUM                       | 71420-79-6                          |  |
| CELASTROL                              | 34157-83-0                          |  |
| CETRIMONIUM BROMIDE                    | 57-09-0, 6899-10-1 [cetrimonium]    |  |
| CETYLPYRIDINIUM CHLORIDE               | 6004-24-6, 123-03-5 [anhydrous]     |  |
| CHLORMEZANONE                          | 80-77-3                             |  |
| CLEROCIDIN                             |                                     |  |
| CLOFAZIMINE                            | 2030-63-9                           |  |
| CLOMIPRAMINE HYDROCHLORIDE             | 17321-77-6, 303-49-1 [clomipramine] |  |
| CLOZAPINE                              | 5786-21-0                           |  |
| CROMOLYN SODIUM                        | 15826-37-6                          |  |
| CYCLIZINE                              | 82-92-8                             |  |
| D-SERINE                               | 312-84-5                            |  |
| DARIFENACIN HYDROBROMIDE               | 133099-07-7                         |  |
| DECAMETHONIUM BROMIDE                  | 541-22-0                            |  |
| DECOQUINATE [5mM]                      | 18507-89-6                          |  |
| DENATONIUM BENZOATE                    | 3734-33-6                           |  |
| DESLO RATIDINE                         | 100643-71-8                         |  |
| DESOXYMETASONE                         | 382-67-2                            |  |
| DIHYDROCELAStRYL DIACETATE             |                                     |  |
| DIHYDROROTENONE                        | 6659-45-6                           |  |
| DILOXANIDE FUROATE                     | 3736-81-0                           |  |
| DISOPYRAMIDE PHOSPHATE                 | 22059-60-5                          |  |
| DOCETAXEL                              | 148408-66-6                         |  |
| DORZOLAMIDE                            | 130693-82-2                         |  |
| DOXAZOSIN MESYLATE                     | 77883-43-3                          |  |
| DOXORUBICIN                            | 23214-92-8                          |  |
| DROXYDOPA                              | 23651-95-8                          |  |
| EDETATE DISODIUM                       | 60-00-4(acid)                       |  |
| ESTRAMUSTINE                           | 2998-57-4                           |  |
| ETHAMIVAN                              | 304-84-7                            |  |

|                                     |                                    |  |
|-------------------------------------|------------------------------------|--|
| ETHANOLAMINE OLEATE                 | 136185                             |  |
| ETHOXZOLAMIDE                       | 452-35-7                           |  |
| ETHYNODIOL DIACETATE                | 297-76-7                           |  |
| FAMPRIDINE                          | 504-24-5                           |  |
| FEBUXOSTAT                          | 144060-53-7                        |  |
| FELBINAC                            | 5728-52-9                          |  |
| FESOTERODINE FUMARATE               | 286930-03-8                        |  |
| FLORFENICOL                         | 76639-94-6                         |  |
| FLUNIXIN MEGLUMINE                  | 42461-84-7                         |  |
| FLUORESCHEIN                        | 153954                             |  |
| FLUOROURACIL                        | 51-21-8                            |  |
| FLUTICASONE PROPIONATE              | 80474-14-2                         |  |
| FLUVOXAMINE MALEATE                 | 61718-82-9                         |  |
| FOMEPIZOLE HYDROCHLORIDE            | 56010-88-8                         |  |
| GABAPENTIN                          | 60142-96-3                         |  |
| GAMBOGIC ACID                       | 2752-65-0                          |  |
| GENTIAN VIOLET                      | 548-62-9                           |  |
| GLIPIZIDE                           | 29094-61-9                         |  |
| GLYBURIDE                           | 10238-21-8                         |  |
| GLYCOPYRROLATE                      | 596-51-0                           |  |
| HELENINE                            | 546-43-0                           |  |
| HYDROCORTISONE VALERATE             | 57524-89-7                         |  |
| IMEXON                              | 59643-91-3                         |  |
| INDOXYL ACETATE                     |                                    |  |
| IDOQUINOL                           | 83-73-8                            |  |
| IOPANIC ACID                        | 96-83-3                            |  |
| ISOETHARINE MESYLATE                | 7279-75-6                          |  |
| ISOVALERAMIDE                       | 541-46-8                           |  |
| L-GLUTAMIC ACID                     | 56-86-0                            |  |
| LANATOSIDE C                        | 17575-22-3                         |  |
| LIOTHYRONINE (L- isomer) SODIUM     | 55-06-1, 6893-02-3 [liothyronine]  |  |
| LOBENDAZOLE                         | 6306-71-4                          |  |
| MANIDIPINE HYDROCHLORIDE            | 89226-75-5                         |  |
| MEBENDAZOLE                         | 31431-39-7                         |  |
| MEFLOQUINE HYDROCHLORIDE            | 53230-10-7                         |  |
| MENADIONE                           | 58-27-5                            |  |
| MESALAMINE                          | 89-57-6                            |  |
| METHSUXIMIDE                        | 77-41-8                            |  |
| METHYLATROPINE NITRATE              | 52-88-0                            |  |
| METHYLENE BLUE                      | 7220-79-3                          |  |
| METHYLPHENIDATE HYDROCHLORIDE       | 298-59-9, 113-45-1(base)           |  |
| METHYLPREDNISOLONE SODIUM SUCCINATE | 173553                             |  |
| METOLAZONE                          | 17560-51-9                         |  |
| MITOTANE                            | 53-19-0                            |  |
| MITOXANTRONE HYDROCHLORIDE          | 70476-82-3, 65271-80-9 [base]      |  |
| MODALINE SULFATE                    | 2856-75-9                          |  |
| MOLSIDOMINE                         | 25717-80-0                         |  |
| MOXIDECTIN                          | 113507-06-5                        |  |
| MUPIROCIN                           | 12650-69-0                         |  |
| NICOTINE BITARTRATE                 | 65-31-6                            |  |
| NIZATIDINE                          | 76963-41-2                         |  |
| NOSCAPINE HYDROCHLORIDE             | 912-60-7, 128-62-1 [noscapine]     |  |
| OLANZAPINE                          | 132539-06-1                        |  |
| ORNIDAZOLE                          | 16773-42-5                         |  |
| OXIBENDAZOLE                        | 20559-55-1                         |  |
| OXYPHENBUTAZONE                     | 7081-38-1, 129-20-4 [anhydrous]    |  |
| OXYQUINOLINE HEMISULFATE            | 134-31-6                           |  |
| PACLITAXEL                          | 33069-62-4                         |  |
| PAMABROM                            | 606-04-2                           |  |
| PANCURONIUM BROMIDE                 | 15500-66-0                         |  |
| PANTHENOL (dl)                      | 16485-10-2                         |  |
| PARAMETHADIONE                      | 115-67-3                           |  |
| PARTHENOLIDE                        | 20554-84-1                         |  |
| PATULIN                             | 149-29-1                           |  |
| PENBUTOLOL SULFATE                  | 38363-32-5                         |  |
| PENTAGASTRIN                        | 5534-95-2                          |  |
| PEONIFLORIN                         | 23180-57-6                         |  |
| PERHEXILINE MALEATE                 | 6724-53-4, 6621-47-2 [perhexiline] |  |
| PERMETHRIN                          | 52341-33-0, 52645-53-1             |  |
| PHENYLMERCURIC ACETATE              | 62-38-4                            |  |
| PHYSOSTIGMINE SULFATE               | 64-47-1                            |  |
| PICROPODOPHYLLIN ACETATE            |                                    |  |
| PIMAGEDINE HYDROCHLORIDE            | 1937-19-5                          |  |
| PIPAMPERONE                         | 1893-33-0                          |  |
| PIPLARTINE                          | 20069-09-4                         |  |
| PLUMBAGIN                           | 481-42-5                           |  |
| PODOPHYLLIN ACETATE                 | 1180-34-3                          |  |
| PRAMIPEXOLE DIHYDROCHLORIDE         | 104632-26-0                        |  |
| PRAVASTATIN SODIUM                  | 81131-70-6                         |  |

|                            |                                   |  |
|----------------------------|-----------------------------------|--|
| PREDNISOLONE HEMISUCCINATE | 2920-86-7                         |  |
| PYRIDOXINE HYDROCHLORIDE   | 65-23-6                           |  |
| PYRITHIONE ZINC            | 13463-41-7                        |  |
| PYRRROMYCIN                | 668-17-7                          |  |
| QUINAPRILAT                | 85441-60-7                        |  |
| RIMANTADINE HYDROCHLORIDE  | 1501-84-4                         |  |
| RISPERIDONE                | 106266-06-2                       |  |
| ROCURONIUM BROMIDE         | 119302-91-9                       |  |
| RUFINAMIDE                 | 106308-44-5                       |  |
| SANGUINARIUM CHLORIDE      | 5578-73-4                         |  |
| SAPPANONE A DIMETHYL ETHER |                                   |  |
| SECURININE                 | 5610-40-2                         |  |
| SITAGLIPTIN PHOSPHATE      | 486460-32-6                       |  |
| SOTALOL HYDROCHLORIDE      | 959-24-0                          |  |
| SULFISOXAZOLE ACETYL       | 80-74-0                           |  |
| SULISOBENZONE              | 4065-45-6                         |  |
| SYMCLOSENE                 | 87-90-1                           |  |
| TACRINE HYDROCHLORIDE      | 1684-40-8                         |  |
| TEICOPLANIN [A(2-1) shown] | 61036-62-2                        |  |
| TEMAZEPAM                  | 846-50-4                          |  |
| TERAZOSIN HYDROCHLORIDE    | 70024-40-7                        |  |
| TERBINAFINE HYDROCHLORIDE  | 78628-80-5                        |  |
| THIMEROSAL                 | 54-64-8                           |  |
| THIOPENTAL SODIUM          | 71-73-8, 76-75-5 [thiopental]     |  |
| THIRAM                     | 137-26-8                          |  |
| TILORONE                   | 27591-69-1, 27591-97-5 [tilorone] |  |
| TOPIRAMATE                 | 97240-79-4                        |  |
| TRAMADOL HYDROCHLORIDE     | 36282-47-0                        |  |
| TROCLOSENE SODIUM          | 2893-78-9                         |  |
| UNDECYLENIC ACID           | 112-38-9                          |  |
| VERAPAMIL HYDROCHLORIDE    | 152-11-4, 52-53-9 [verapamil]     |  |
| VINBLASTINE SULFATE        | 143-67-9, 865-21-4 [vinblastine]  |  |
| VORINOSTAT                 | 149647-78-9                       |  |
| VORTIOXETINE HYDROBROMIDE  | 508233-74-7                       |  |
| ZALEPLON                   | 151319-34-5                       |  |
| ZILEUTON                   | 111406-87-2                       |  |
| ZINC UNDECYLENATE [4mM]    | 557-08-4                          |  |
| ZOLMITRIPTAN               | 139264-17-8                       |  |

**Supplementary Information Table 3. List of primers used in the study.**

| <b>Green monkey (<i>Chlorocebus sabaeus</i>)</b> |                        |                        |
|--------------------------------------------------|------------------------|------------------------|
| Genes                                            | Forward primer (5'-3') | Reverse primer (5'-3') |
| CsACE2_1                                         | GTCCACACTTGCCCAAATGT   | CTGAGAGCACTGAAGACCCA   |
| CsACE2_2                                         | TTCAAGGAGGCCGAGAAGTT   | GGGGTGGCAGACTACTTTCT   |
| CsTMPRSS2                                        | GGACAGTGTGCACCTCAAAG   | CACTTGCTGCCCATGAACTT   |
| CsTMEM16A                                        | TTTGTGACAAGACCTGCAGC   | CAGAGGGCCATGAAGACAGA   |
| CsTMEM16B                                        | GTTGGGGAAGCAGTTGATCC   | TCGAATGGGCAGAGTCAGTT   |
| CsTMEM16C                                        | GTGAGCTTGGCATGGGAAAA   | AGGCCAATCTAGCAGCAAGA   |
| CsTMEM16D                                        | TTTTGACAACGGAGCCACTG   | TCTTCCTCCTCTTCCTCCCA   |
| CsTMEM16E                                        | TGTCAAGATCCATGCCCTT    | AGTTTGCTTAGGTCGGGGAA   |
| CsTMEM16F_1                                      | ACAGCCTCCATCATCAGCTT   | AATCAGTCTGGGTCCTGGG    |
| CsTMEM16F_2                                      | AGGAGAGGGAGGTGATTTGC   | GAGTTTCCCGTTGCTGCTAG   |
| CsTMEM16G                                        | TTGAGATGTGCCACTTTGC    | ACAGTGCCATGAACAAGCTG   |
| CsTMEM16H                                        | GATGACCACACGCTGCTATG   | AGTAGGCTCTCATACGTGGC   |
| CsTMEM16J                                        | CGTGAGAAGATGTGGCATGG   | TGGCACTGAAGATGGAGGTT   |
| CsTMEM16K                                        | CCCTGCCATTTGTATGCCTC   | CACATACAACAGGACGCTGG   |
| CsXkr8                                           | GCAGTCAGTCTTCAGGCCTA   | GAACCCTCCCGTCACCTAAA   |
| <b>Human</b>                                     |                        |                        |
| ACE2                                             | TGCTTGGTGATATGTGGGGT   | AACTTCTCGGCCTCCTTGAA   |
| TMPRSS2                                          | GGACAGTGTGCACCTCAAAG   | CACTTGCTGCCCATGAACTT   |
| TMEM16A                                          | AGCTGACATGGAGAGATCGG   | TAGATGATGACGCCGAGGAC   |
| TMEM16B                                          | CGATATACCCCTGCTCCCTG   | CTGGCATCTTGAGACTGC     |
| TMEM16C                                          | AACCACATCAGCCTTCCTCA   | CCACAACCTCAAACACTGCA   |
| TMEM16D                                          | AGCCGATGAATGCCTATGGA   | CAGAAGTGGTGTAGGGGAA    |
| TMEM16E                                          | TTCGAGTGGATGCCTGGAAA   | TTGCAACAGAAAGGACAGCC   |
| TMEM16F                                          | GGACCACACTTCCTACACCA   | CCAGGTCAGAGTACGGGTTT   |
| TMEM16G                                          | TTGAACCCCTCCCTCATT     | GTAAAGCGGCACTGTCAGAG   |
| TMEM16H                                          | GATGACCACACGCTGCTATG   | CGGTGACAAAGAAGGCGTAG   |
| TMEM16J                                          | CGTGAGAAGATGTGGCATGG   | CTCCTGGCACTGAAGATGGA   |
| TMEM16K                                          | ATTTACCTGGTCTCCCTGCC   | ATGTAGACCCAAGGCCCAA    |
| Xkr8                                             | CGCATGACCCATTTAGCACA   | CTGGGTCTGATCCTGCTTCA   |
| GAPDH                                            | CCAAGGAGTAAGACCCCTGG   | AGGGGAGATTCAGTGTGGTG   |

Extended Data Figure 7b

Extended Data Figure 8b

Extended Data Figure 8c

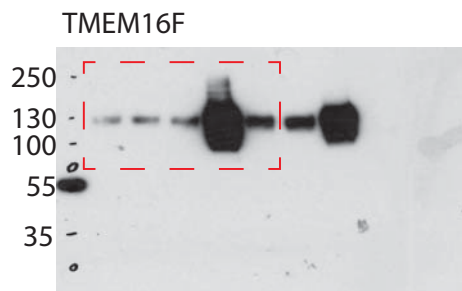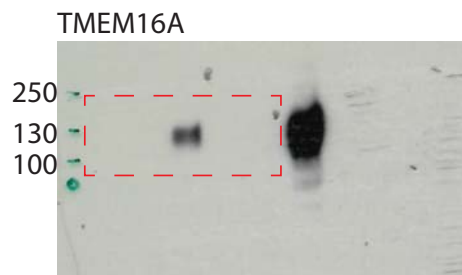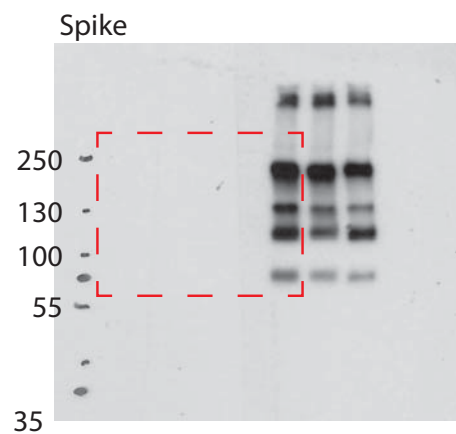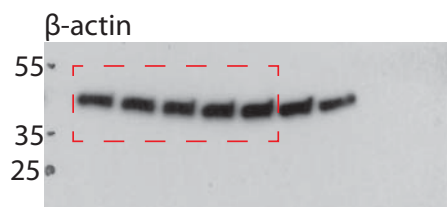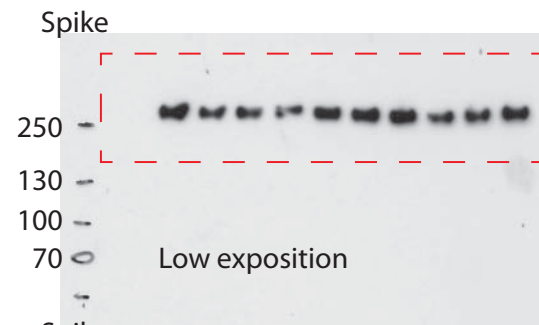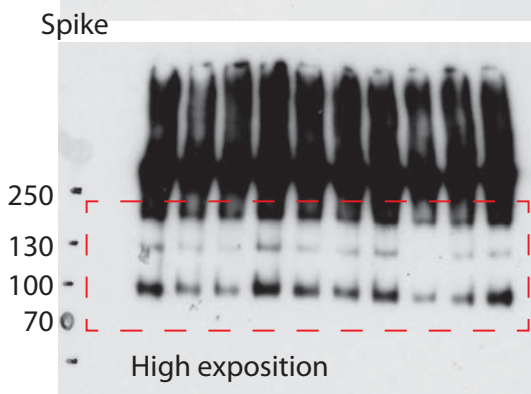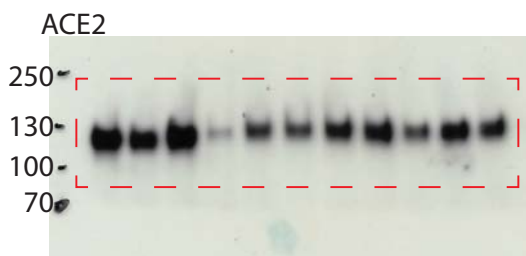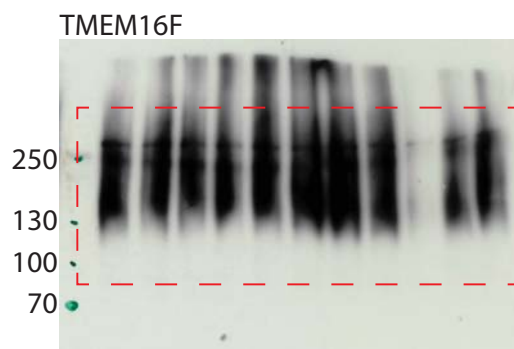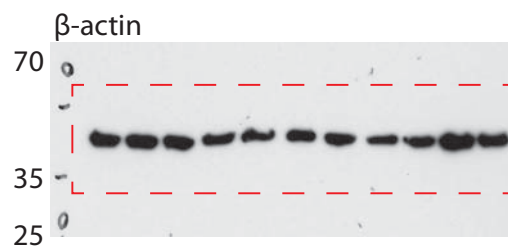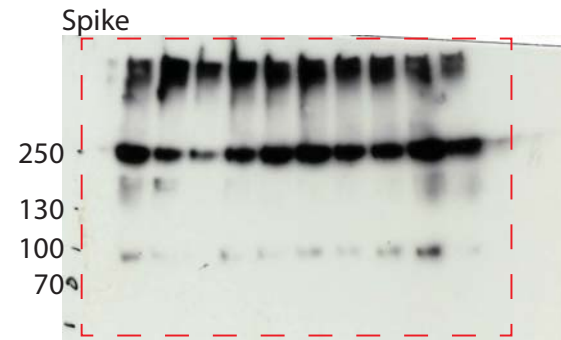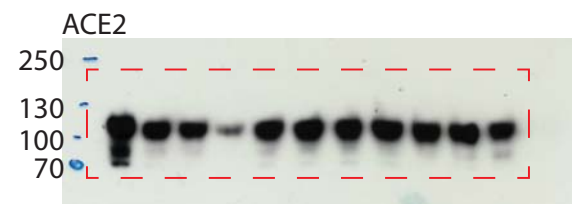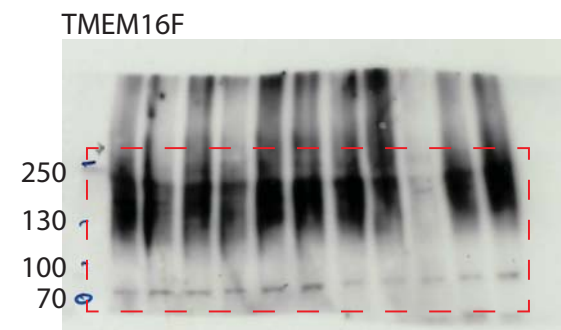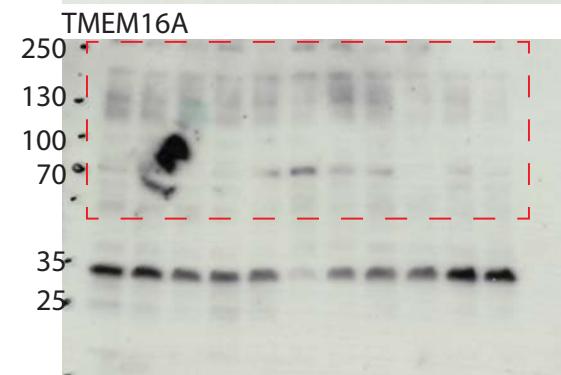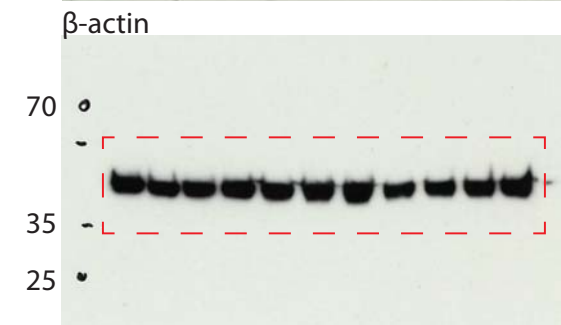

**Supplementary Information Figure 1.** Original blots relative to Extended Data Figs. 7b and 8b and 8c. Boxes with red dotted lines are the regions used in the figures.
